# Supplementary material for: A DNA methylation haplotype block landscape in human tissues and preimplantation embryos reveals regulatory elements defined by comethylation patterns
Source: HighWire-hosted journal article supplement (doi:10.1101/gr.278146.123), 2023-11-08
Supplement: Supplemental_Table_S1.xlsx [file Supplemental_Table_S1.xlsx]

## Sheet: README
Supplemental Table S1: Data source
Sheet	Description
WGBS for discovery	WGBS samples for identification of MHBs in 17 somatic normal tissues. Metadata and quality control metrics were shown.
WGBS for validation	WGBS samples for the validation of MHBs (Fig. 1F). Metadata and quality control metrics were shown.
Open chromatin regions	ATAC-seq samples to define open chromatin regions and Nucleosome-free regions (Fig. 2A-B).
Enhancers	ChIP-seq peaks	ChIP-seq of histone modifications, including H3K4me3, H3K27ac, H3k4me1,H3K36me3, H3K27me3, H3K9me3 and H3K9ac (Fig. 2B, 2E).
	EnhA1 regions	Enhancers (EnhA1) defined by ChromHMM (Fig. 2F). Data was downloaded from http://compbio.mit.edu/epimap/.
	Super-enhancers	Super-enhancers downloaded from public database (http://www.licpathway.net/sedb/index.php) and converted the genomic coordinates to hg19 using the UCSC liftOver tool(Fig. 2H).
ChIP-seq of TFs	ChIP-seq samples of TFs were downloaded from GEO (Fig. 3E-F). When applicable, the genomic coordinates were converted to hg19.
preimplantation embryos	Single-cell BS-seq	Processed data was downloaded from scMethBank (https://ngdc.cncb.ac.cn/methbank/scm) and converted to mHap format files using mHapSuite (Fig. 5B).
	Bulk BS-seq	Raw data was downloaded from NCBI GEO and aligned to human genome hg19 using BSMAP (Fig. 5A).
	GCH	Raw data was downloaded from NCBI GEO (Fig. 5D).
Other datasets	ChIA-PET	Raw data from ENCODE (Fig.2C). When applicable, the genomic coordinates were converted to hg19.
	RNA-seq (Tissue)	Raw data was downloaded from GEO (Fig. 4A, 4B).
	WGBS (T-cell, B-cell)	Raw data was downloaded from GEO (Fig. 4D).
	RNA-seq (T-cell, B-cell)	Raw data was downloaded from GEO (Fig. 4D).
	scRNA-seq	Raw data was downloaded from GEO (Fig. 5H).

## Sheet: WGBS for discovery
GSE	GSM	SRA	Tissue	total_read_pairs	unique pairs	mapping_ratio	COV_CGI_N_5x	COV_CGI_N_10x	COV_CGI_median	COV_CGI_mean	COV_nonCGI_N_5x	COV_nonCGI_N_10x	COV_nonCGI_median	COV_nonCGI_mean	CpG_CGI_methylation	CpG_nonCGI_methylatoin	CHG_CGI_methylation	CHG_nonCGI_methylation	CHH_CGI_methylation	CHH_nonCGI_methylation
GSE29069	GSM721195	SRX062004	Breast	925913953	778637482	0.841	1943303	1776164	18	18.53	24484833	23447837	24	25.93	0	0.8947	0.005217	0.005195	0.00464	0.004702
GSE70090	GSM1716957	SRX1069706	Liver	426229836	309014755	0.725	1954886	1861302	24	24.2	21904551	16599208	13	14.28	0.025	0.8	0.01467	0.01712	0.007324	0.00858
GSE70090	GSM1716961	SRX1069710	Liver	398123550	285785149	0.718	1954191	1843806	23	23.25	21904237	16307295	13	13.78	0	0.8	0.01408	0.01626	0.006719	0.007685
GSE70090	GSM1716973	SRX1069722	Lung	622435062	443488102	0.713	1977951	1930841	34	33.8	23732681	20786372	19	20.77	0.02083	0.8056	0.01345	0.01547	0.006588	0.00746
GSE70090	GSM1716977	SRX1069726	Lung	440985487	317707933	0.72	1960162	1879955	25	25.18	22163286	17070654	13	14.7	0	0.8	0.01399	0.01598	0.006346	0.007774
GSE79215	GSM2088202	SRX1631736	Colon	26648944	17526103	0.658	4370	155	1	1.456	204725	6317	1	1.739	0	0.8	0.005634	0.006879	0.005072	0.006324
GSE79215	GSM2088208	SRX1631742	Pancreas	30357957	23586044	0.777	466	79	1	1.197	580516	10722	2	1.993	0.2929	0.8	0.006228	0.008021	0.006202	0.007979
GSE86340	GSM2103002	SRX1648319	T-cell	492408223	468386049	0.951	1770518	1126904	10	11.14	24962679	23859187	26	28.6	0	0.9091	0.004071	0.00421	0.003801	0.003884
GSE86340	GSM2103003	SRX1648432	T-cell	294612442	277222792	0.941	1477765	523548	7	7.398	24328625	20635037	16	17.5	0	0.9062	0.006265	0.005773	0.006348	0.005606
GSE86340	GSM2103006	SRX1648565	T-cell	310159245	291714232	0.941	1441843	507532	7	7.291	24357880	20885211	17	18.06	0	0.8929	0.007084	0.006171	0.006792	0.005852
GSE86340	GSM2103007	SRX1648566	T-cell	402477317	382662883	0.951	1682107	878125	9	9.417	24812065	23056573	22	23.37	0	0.881	0.004544	0.004257	0.003921	0.003873
GSE79799	GSM2103014	SRX1649893	Lung	239374566	217224512	0.907	1907016	1694233	18	18.57	19750157	12440325	10	10.72	0	0.8	0.001517	0.001862	0.001557	0.002243
GSE39775	GSM978964	SRX172462	Placenta	111732876	88458555	0.792	628370	29120	4	3.871	5411955	211121	3	3.477	0	0.8	0.004405	0.005534	0.004499	0.005183
GSE16256	GSM983650	SRX175353	Heart	2904274027	2504379027	0.862	1980574	1957686	44	47.65	25018020	24860450	73	82.6	0	0.9041	0.004933	0.005557	0.004746	0.005369
GSE16256	GSM983651	SRX175354	Pancreas	2919409801	2473687952	0.847	1980103	1954046	43	46.4	25007199	24832589	69	76.07	0	0.8333	0.004898	0.005012	0.004662	0.004981
GSE16256	GSM983652	SRX175355	Spleen	2720802871	2358289902	0.867	1982252	1961684	49	52.8	25016290	24851440	70	76.99	0	0.8936	0.004767	0.004778	0.004164	0.004378
GSE16256	GSM1010978	SRX190150	Heart	2269927051	1958763496	0.863	1961405	1844245	21	22.56	24945464	24654341	48	54.25	0	0.9135	0.004839	0.005536	0.004831	0.005677
GSE16256	GSM1010979	SRX190151	Thymus	2543156123	2212853536	0.87	1972743	1915188	26	27.69	24997940	24791408	58	62.67	0	0.9579	0.004677	0.004558	0.004034	0.004133
GSE16256	GSM1010980	SRX190152	Ovary	2602702297	2278647210	0.875	1968127	1888504	23	25.09	24899953	24699770	58	64.41	0	0.8958	0.004568	0.004669	0.004247	0.004515
GSE16256	GSM1010981	SRX190153	Adrenal gland	1864098382	1644706540	0.882	1942395	1719549	17	18.56	24898977	24496451	40	45.83	0	0.8824	0.004755	0.004645	0.004059	0.004277
GSE16256	GSM1010983	SRX190155	Adipose	1980699624	1722319163	0.87	1937030	1706223	17	18.74	24893149	24512356	42	47.41	0	0.9074	0.004744	0.004572	0.00416	0.004222
GSE16256	GSM1010984	SRX190156	Stomach	2257339465	1948965686	0.863	1955376	1807015	20	21.77	24939949	24658175	49	54.35	0	0.907	0.004537	0.004513	0.003893	0.004251
GSE16256	GSM1010989	SRX190161	Colon	2797837684	2422889947	0.866	1984549	1973308	57	58.28	25036040	24899884	77	79.7	0.01	0.914	0.004533	0.004556	0.003932	0.004114
GSE86732	GSM2308567	SRX2156984	Breast	581384437	355627191	0.612	800409	116942	4	4.551	22812386	15477512	11	12.34	0	0.8846	0.01134	0.01094	0.01065	0.009972
GSE39775	GSM1083880	SRX237631	Placenta	143602735	117994256	0.822	482999	23968	3	3.491	8508793	509204	4	4.198	0	0.8	0.003178	0.004671	0.003817	0.004162
GSE39775	GSM1083881	SRX237632	Placenta	124985627	99000537	0.792	432950	20539	3	3.35	6359761	311277	3	3.739	0	0.8	0.003226	0.0045	0.003222	0.003887
GSE16256	GSM1120319	SRX263875	Heart	416050318	355023688	0.853	627405	50355	3	3.927	20806394	10964852	9	9.969	0	0.9	0.005066	0.006049	0.005177	0.005943
GSE16256	GSM1120322	SRX263878	Thymus	171714651	145223423	0.846	87269	1329	2	2.153	8811444	742209	4	4.257	0	1	0.005583	0.004781	0.004261	0.00433
GSE16256	GSM1120323	SRX263879	Ovary	177259419	149978718	0.846	75375	1192	2	2.093	9085484	795039	4	4.386	0	0.8571	0.005199	0.005295	0.004552	0.005082
GSE16256	GSM1120324	SRX263880	Adrenal gland	414174261	349508639	0.844	396850	22976	3	3.255	18962642	9118278	8	9.124	0	0.875	0.00515	0.005341	0.004695	0.004803
GSE16256	GSM1120330	SRX263886	Adipose	427453609	356832954	0.835	468310	30605	3	3.474	19949256	9960223	8	9.44	0	0.9	0.005252	0.005062	0.005059	0.004598
GSE46698	GSM1134682	SRX275731	Placenta	445013381	338606116	0.761	1980009	1936492	46	46.53	22370672	19543081	22	27.47	0	0.775	0.00152	0.002814	0.00168	0.002818
GSE17312	GSM1186665	SRX323156	Placenta	370424759	319334256	0.862	1994270	1972043	49	48.74	24035178	21919561	25	26.78	0	0.7419	0.001799	0.002588	0.001893	0.002525
GSE49627	GSM1202806	SRX332378	B-cell	186399024	122519687	0.657	186734	4571	2	2.538	13112555	2248738	5	5.391	0	1	0.01445	0.01572	0.01363	0.01569
GSE49627	GSM1202807	SRX332379	B-cell	173305136	118736086	0.685	143667	3462	2	2.373	12294690	2179901	5	5.237	0	1	0.0151	0.02071	0.01507	0.02034
GSE46644	GSM1204466	SRX332737	Colon	521835098	406951035	0.78	1999921	1981637	68	67.77	22819546	20689429	31	37.35	0.01429	0.8462	0.001105	0.001601	0.001045	0.001394
GSE52272	GSM1279519	SRX381553	Colon	603089698	459898166	0.763	1990949	1964585	62	63.11	22890841	21002997	35	40.94	0.009091	0.8333	0.0013	0.001964	0.001266	0.001688
GSE52272	GSM1279517	SRX381631	Breast	597238078	499766718	0.837	1975744	1921017	30	30.91	24828101	23828788	30	31.85	0	0.8696	0.001209	0.00247	0.001259	0.002393
GSE52272		SRX381671	Liver	994453627	826244501	0.831	1992297	1966964	50	50.88	24954689	24324378	49	52.08	0.01538	0.8667	0.00311	0.004106	0.003192	0.004142
GSE52272		SRX381710	Placenta	445013381	338605827	0.761	1980004	1936488	46	46.53	22370256	19542984	22	27.47	0	0.775	0.00152	0.002814	0.00168	0.002817
GSE52272	GSM1279527	SRX381713	Lung	333324511	258827953	0.777	1848164	1426963	13	13.8	24299803	20180420	15	16.18	0	0.875	0.003198	0.003798	0.003006	0.003569
GSE52272	GSM1279518	SRX381725	B-cell	318707620	219692614	0.689	1838458	1411568	13	13.71	23739824	17778648	13	13.95	0	0.8947	0.003267	0.003533	0.00306	0.00323
GSE16256	GSM1282348	SRX388732	Adipose	1156039422	993276928	0.859	1675893	875201	9	9.669	24549747	23024210	24	26.94	0	0.8824	0.004961	0.00557	0.005122	0.005872
GSE16256	GSM1282349	SRX388733	Stomach	1344797795	1148467700	0.854	1762641	1072450	10	11.08	24701895	23724386	28	31.05	0	0.9	0.004719	0.00509	0.004418	0.004978
GSE16256	GSM1282350	SRX388734	Lung	1166424902	1001756331	0.859	1631039	816196	8	9.349	24605331	23235275	25	27.49	0	0.9259	0.004435	0.004586	0.004113	0.004329
GSE16256	GSM1282353	SRX388737	Spleen	1319925609	1143623009	0.866	1760298	1075046	10	11.1	24706738	23724031	28	30.9	0	0.931	0.005394	0.005009	0.004794	0.004721
GSE16256	GSM1282354	SRX388738	Adrenal gland	1400555399	1207273707	0.862	1843425	1268185	11	12.44	24668043	23881733	29	33.33	0	0.8947	0.004454	0.005186	0.004435	0.004959
GSE16256	GSM1282357	SRX388741	Adipose	1281704350	1110404739	0.866	1779498	1078861	10	11.04	24620959	23683311	27	30.73	0	0.9032	0.004906	0.004784	0.004234	0.004532
GSE16256	GSM1282358	SRX388742	Stomach	1432873518	1230389935	0.859	1745538	1058559	10	11.03	24634536	23818997	30	33.29	0	0.9	0.00478	0.004759	0.004275	0.004571
GSE16256	GSM1282359	SRX388743	Pancreas	1197510639	1031769392	0.862	1601257	755532	8	8.969	24501038	23134632	24	27.84	0	0.8824	0.005095	0.005128	0.004957	0.005322
GSE16256	GSM1282362	SRX388746	Spleen	1453081779	1253868690	0.863	1823419	1237935	11	12.3	24675303	23974687	31	33.97	0	0.907	0.00488	0.004968	0.004496	0.004639
GSE127299	GSM3633630	SRX5457072	Adrenal gland	897319304	703138010	0.784	953876	226352	4	5.442	24343402	20922727	19	23.96	0	0.8667	0.005871	0.005887	0.005648	0.005409
GSE127284	GSM3633633	SRX5457075	Liver	332845853	257761513	0.774	156082	14347	2	2.419	19189779	11585720	9	11.79	0	0.8333	0.006783	0.006125	0.006454	0.005551
GSE127284	GSM3633634	SRX5457076	Liver	559925231	442486350	0.79	849786	170741	4	4.889	24080372	20306743	17	20	0	0.8571	0.006467	0.005686	0.00532	0.005291
GSE127292	GSM3633683	SRX5457083	Stomach	876037614	707858024	0.808	1218876	393151	6	6.56	24694096	21881420	19	20.99	0	0.875	0.006041	0.005437	0.00515	0.005047
GSE127293	GSM3633684	SRX5457084	Ovary	906959618	734585080	0.81	1622150	783068	8	9.097	25086223	24031906	27	30.23	0	0.8974	0.00547	0.005563	0.005526	0.005222
GSE127294	GSM3633685	SRX5457085	Heart	943918976	750414450	0.795	1299290	390460	6	6.888	24741050	22388642	23	28.34	0	0.8929	0.005979	0.006485	0.005643	0.006289
GSE127295	GSM3633686	SRX5457086	Pancreas	808781652	639677967	0.791	677774	162250	3	4.55	23826020	19899402	18	21.84	0	0.8571	0.006146	0.005868	0.006141	0.00556
GSE127299	GSM3633921	SRX5457089	Thyroid gland	904125917	735488817	0.813	1005591	335270	5	6.204	24756648	22792372	27	33.62	0	0.92	0.006016	0.005662	0.00557	0.005405
GSE127302	GSM3633945	SRX5457092	Esophagus	543839220	397390241	0.731	395253	61246	3	3.401	22168606	15961243	12	14.67	0.08333	0.8571	0.005744	0.005707	0.0061	0.005202
GSE127303	GSM3633946	SRX5457093	Stomach	432256149	327903532	0.759	257760	33513	2	2.874	20571999	12880721	10	11.94	0	0.8824	0.006583	0.005846	0.006252	0.005318
GSE127306	GSM3633950	SRX5457097	Thyroid gland	926761796	751364373	0.811	895276	250855	4	5.535	24472535	21818985	24	29.86	0	0.9118	0.006343	0.005558	0.005517	0.005294
GSE127299	GSM3633956	SRX5457103	Adrenal gland	898068332	694222695	0.773	759678	164254	4	4.712	23922218	20041138	17	19.68	0	0.8788	0.006256	0.006113	0.005695	0.005706
GSE127312	GSM3633957	SRX5457104	Spleen	939281495	773557817	0.824	1213886	368355	5	6.697	24605785	22151918	23	27.96	0	0.8723	0.006037	0.005496	0.00526	0.004982
GSE127315	GSM3633974	SRX5457106	Spleen	833527785	688424647	0.826	1235225	356465	6	6.606	24639540	21901594	21	25.55	0	0.9	0.005629	0.005373	0.004985	0.004849
GSE127320	GSM3633985	SRX5457111	Ovary	866648284	713302101	0.823	1456558	638091	7	8.398	25029551	23901101	29	32.84	0	0.9048	0.005951	0.005664	0.005258	0.005361
GSE127323	GSM3633989	SRX5457113	Stomach	297918656	228662530	0.768	176869	8840	2	2.508	17213120	6705516	7	7.629	0	0.8824	0.005603	0.005951	0.006084	0.005249
GSE127325	GSM3633991	SRX5457115	Esophagus	838435838	678896773	0.81	882750	193561	4	5.116	24151699	20340867	17	20.53	0	0.8947	0.005929	0.005816	0.00552	0.005413
GSE149608	GSM4505856	SRX8208802	Esophagus	378997097	305608674	0.806	1723998	955749	9	9.728	24348823	21435402	17	17.82	0	0.8621	0.004789	0.005152	0.004495	0.004712
GSE149608	GSM4505857	SRX8208803	Esophagus	369755701	297912828	0.806	1730884	956798	9	9.74	24195881	21111625	16	16.73	0	0.85	0.004996	0.005647	0.004582	0.005188
GSE116229	GSM4914800	SRX9531756	B-cell	280322051	260422060	0.929	1669715	1104199	11	12.34	24523080	21901471	21	23.24	0	0.9412	0.01552	0.01337	0.01619	0.01336
GSE116229	GSM4914801	SRX9531757	B-cell	302958811	280199294	0.925	1904725	1597511	15	16.11	24863083	23117777	23	23.05	0	0.9333	0.009743	0.00935	0.009788	0.00895

## Sheet: WGBS for validation
GSE	GSM	SRA	Tissue	total_read_pairs	unique pairs	mapping_ratio	COV_CGI_N_5x	COV_CGI_N_10x	COV_CGI_median	COV_CGI_mean	COV_nonCGI_N_5x	COV_nonCGI_N_10x	COV_nonCGI_median	COV_nonCGI_mean	CpG_CGI_methylation	CpG_nonCGI_methylatoin	CHG_CGI_methylation	CHG_nonCGI_methylation	CHH_CGI_methylation	CHH_nonCGI_methylation
GSE70090	GSM1716965	SRX1069714	liver	449248262	326124361	0.726	1957553	1870210	24	24.57	22426715	17679382	14	15.18	0.02381	0.7857	0.01432	0.01625	0.006535	0.007652
GSE70090	GSM1716969	SRX1069718	liver	399327411	278486672	0.697	1944638	1784604	19	19.41	20594008	13598879	10	11.44	0	0.8182	0.01325	0.01592	0.006941	0.01215
GSE70090	GSM1716981	SRX1069730	lung	411049367	291280131	0.709	1964360	1873122	24	23.96	22213711	16809956	13	14.11	0	0.8333	0.01139	0.0137	0.005187	0.008482
GSE79799	GSM2103008	SRX1648637	liver	289431699	264129881	0.913	1949188	1848657	26	26.41	21473047	16050645	13	14.31	0	0.8	0.008142	0.00919	0.004302	0.004902
GSE79799	GSM2103010	SRX1649880	liver	159787502	146601296	0.917	1849529	1422540	13	13.5	16331623	7225363	7	7.619	0	0.8	0.005607	0.006986	0.003635	0.007415
GSE79799	GSM2103016	SRX1651655	lung	264052288	242684963	0.919	1944564	1841372	23	23.26	21228842	15275039	12	13.25	0	0.8	0.0135	0.01536	0.006039	0.006799
GSE79799	GSM2103018	SRX1651658	lung	156140197	143053084	0.916	1841160	1405385	13	13.43	16138638	7010450	7	7.487	0	0.8182	0.00135	0.001962	0.00129	0.003568
GSE16256	GSM1010988	SRX190160	heart	1882238808	1636904206	0.87	1946840	1744745	18	18.89	24902183	24533677	41	46.58	0	0.9	0.005288	0.005503	0.004713	0.005358
GSE16256	GSM1120337	SRX263893	heart	426546126	366726190	0.86	569220	44006	3	3.779	20723893	11047461	9	10.28	0	0.9	0.004851	0.005782	0.005286	0.00542
GSE111445	GSM3030954	SRX3766941	Adipose	503927883	488810716	0.97	1971212	1923102	26	25.69	24875922	24275568	27	26.83	0	0.8788	0.004249	0.004515	0.003177	0.004105
GSE111445	GSM3030955	SRX3766942	Adipose	393884651	381582167	0.969	1944790	1750055	16	16.09	24783027	23698208	20	20.62	0	0.8889	0.01272	0.009858	0.009872	0.008542
GSE111445	GSM3030956	SRX3766943	Adipose	407618506	394892282	0.969	1957132	1826004	18	17.68	24812105	23879108	21	21.07	0	0.875	0.0139	0.0111	0.01039	0.009825
GSE111445	GSM3030957	SRX3766944	Adipose	501963330	488178445	0.973	1954852	1835694	18	18.04	24693486	23761414	22	21.79	0	0.8889	0.01337	0.0105	0.009517	0.009061
GSE16256	GSM1282352	SRX388736	heart	1343903289	1147518143	0.854	1762096	1105622	10	11.31	24716501	23821247	28	32.02	0	0.913	0.005032	0.006113	0.005097	0.006291
GSE127316	GSM3633975	SRX5457107	heart	919831066	726112996	0.789	1137287	301723	5	6.175	24546567	21818844	22	27.17	0	0.8929	0.005683	0.006345	0.005734	0.005977

## Sheet: open chromatin regions
Tissue	SRX	GSM	Assay
Adipose	SRX10660811	GSM5258540	ATAC-seq
Adipose	SRX10660834	GSM5258563	ATAC-seq
Adrenal gland	SRX10475832	GSM5214659	ATAC-seq
Adrenal gland	SRX10477189	GSM5215060	ATAC-seq
Adrenal gland	SRX10661472	GSM5259141	ATAC-seq
B-cell	SRX13339528	GSM5720221	ATAC-seq
B-cell	SRX13339529	GSM5720222	ATAC-seq
B-cell	SRX13339534	GSM5720227	ATAC-seq
Breast	SRX10660969	GSM5259007	ATAC-seq
Breast	SRX10661497	GSM5259170	ATAC-seq
Breast	SRX7089299	GSM4146514	ATAC-seq
Colon	SRX10474959	GSM5213857	ATAC-seq
Colon	SRX10475824	GSM5214651	ATAC-seq
Colon	SRX10475825	GSM5214652	ATAC-seq
Colon	SRX7089381	GSM4146596	ATAC-seq
Esophagus	SRX10661008	GSM5258748	ATAC-seq
Esophagus	SRX10661227	GSM5258778	ATAC-seq
Heart	SRX10474969	GSM5213866	ATAC-seq
Heart	SRX10474968	GSM5213867	ATAC-seq
Heart	SRX10476626	GSM5214858	ATAC-seq
Heart	SRX10476627	GSM5214859	ATAC-seq
Liver	SRX10476603	GSM5214835	ATAC-seq
Liver	SRX10478233	GSM5215381	ATAC-seq
Liver	SRX10478520	GSM5215646	ATAC-seq
Liver	SRX10478521	GSM5215647	ATAC-seq
Lung	SRX10478051	GSM5215222	ATAC-seq
Lung	SRX10478461	GSM5215587	ATAC-seq
Lung	SRX10478623	GSM5215744	ATAC-seq
Lung	SRX10478624	GSM5215745	ATAC-seq
Ovary	SRX10475104	GSM5213982	ATAC-seq
Ovary	SRX10478472	GSM5213983	ATAC-seq
Ovary	SRX10478473	GSM5215598	ATAC-seq
Pancreas	SRX10475361	GSM5215599	ATAC-seq
Pancreas	SRX10660752	GSM5258361	ATAC-seq
Pancreas	SRX10661334	GSM5214950	ATAC-seq
Placenta	SRX6696979	GSM5215147	ATAC-seq
Placenta	SRX6696980	GSM5258434	ATAC-seq
Spleen	SRX10660896	GSM5258439	ATAC-seq
Stomach	SRX10476630	GSM5258904	ATAC-seq
Stomach	SRX10478609	GSM4026150	ATAC-seq
Stomach	SRX10661263	GSM4026151	ATAC-seq
T-cell	SRX9040273	GSM5258660	ATAC-seq
T-cell	SRX9040274	GSM5214862	ATAC-seq
T-cell	SRX9040275	GSM5215731	ATAC-seq
T-cell	SRX9040276	GSM5258813	ATAC-seq
Thymus	SRX8383201	GSM4756917	ATAC-seq
Thymus	SRX8383203	GSM4756918	ATAC-seq
Thymus	SRX8383205	GSM4756919	ATAC-seq
Thyroid gland	SRX10474882	GSM4756920	ATAC-seq
Thyroid gland	SRX10475618	GSM4756921	ATAC-seq
Thyroid gland	SRX10661381	GSM4756922	ATAC-seq

## Sheet: Enhancers
ChIP-seq peaks				EnhA1 regions			Super-enhancers
Sample name	tissue	type	data source	Sample name	tissue	data source	Sample name	tissue	data source
E063	Adipose	H3K4me1	Roadmap	BSS00038	Adipose	Epimap	SE_00_0001	Adipose	SEdb 2.0
E063	Adipose	H3K4me3	Roadmap	BSS00043	Adipose	Epimap	SE_02_0465	Adipose	SEdb 2.0
E063	Adipose	H3K9ac	Roadmap	BSS01665	Adipose	Epimap	SE_02_0466	Adipose	SEdb 2.0
E063	Adipose	H3K9me3	Roadmap	BSS01666	Adipose	Epimap	SE_02_1122	Adipose	SEdb 2.0
E063	Adipose	H3K27ac	Roadmap	BSS01668	Adipose	Epimap	SE_02_1123	Adipose	SEdb 2.0
E063	Adipose	H3K27me3	Roadmap	BSS01669	Adipose	Epimap	SE_02_1125	Adipose	SEdb 2.0
E063	Adipose	H3K36me3	Roadmap	BSS01667	Adipose	Epimap	SE_02_1128	Adipose	SEdb 2.0
E080	Adrenal gland	H3K4me1	Roadmap	BSS01394	Adipose	Epimap	SE_02_1129	Adipose	SEdb 2.0
E080	Adrenal gland	H3K4me3	Roadmap	BSS01393	Adipose	Epimap	SE_00_0051	Adrenal gland	SEdb 2.0
E080	Adrenal gland	H3K9me3	Roadmap	BSS00052	Adrenal gland	Epimap	SE_01_0069	Adrenal gland	SEdb 2.0
E080	Adrenal gland	H3K27ac	Roadmap	BSS00057	Adrenal gland	Epimap	SE_01_0106	Adrenal gland	SEdb 2.0
E080	Adrenal gland	H3K27me3	Roadmap	BSS00058	Adrenal gland	Epimap	SE_01_0108	Adrenal gland	SEdb 2.0
E080	Adrenal gland	H3K36me3	Roadmap	BSS00045	Adrenal gland	Epimap	SE_00_0005	B-cell	SEdb 2.0
E026	B-cell	H3K4me1	Roadmap	BSS00046	Adrenal gland	Epimap	SE_02_0390	B-cell	SEdb 2.0
E026	B-cell	H3K4me3	Roadmap	BSS00047	Adrenal gland	Epimap	SE_01_0020	B-cell	SEdb 2.0
E026	B-cell	H3K9ac	Roadmap	BSS00048	Adrenal gland	Epimap	SE_01_0072	Breast	SEdb 2.0
E026	B-cell	H3K9me3	Roadmap	BSS00054	Adrenal gland	Epimap	SE_00_0035	Colon	SEdb 2.0
104023;42278;44037;45182;48284	B-cell	H3K27ac	CistromeDB	BSS00060	Adrenal gland	Epimap	SE_00_0056	Colon	SEdb 2.0
E026	B-cell	H3K27me3	Roadmap	BSS00055	Adrenal gland	Epimap	SE_01_0099	Colon	SEdb 2.0
E026	B-cell	H3K36me3	Roadmap	BSS00056	Adrenal gland	Epimap	SE_01_0109	Colon	SEdb 2.0
E027	Breast	H3K4me1	Roadmap	BSS00050	Adrenal gland	Epimap	SE_02_0477	Colon	SEdb 2.0
E027	Breast	H3K4me3	Roadmap	BSS00051	Adrenal gland	Epimap	SE_02_0478	Colon	SEdb 2.0
E027	Breast	H3K9me3	Roadmap	BSS00059	Adrenal gland	Epimap	SE_00_0011	Esophagus	SEdb 2.0
E027	Breast	H3K9ac	Roadmap	BSS00097	B-cell	Epimap	SE_00_0050	Esophagus	SEdb 2.0
E027	Breast	H3K27me3	Roadmap	BSS01345	B-cell	Epimap	SE_01_0107	Esophagus	SEdb 2.0
E027	Breast	H3K36me3	Roadmap	BSS00098	B-cell	Epimap	SE_01_0074	Esophagus	SEdb 2.0
105307;105309	Breast	H3K27ac	CistromeDB	BSS00093	B-cell	Epimap	SE_01_0075	Esophagus	SEdb 2.0
E106	Colon	H3K4me1	Roadmap	BSS00096	B-cell	Epimap	SE_00_0046	Heart	SEdb 2.0
E106	Colon	H3K4me3	Roadmap	BSS00100	B-cell	Epimap	SE_00_0052	Heart	SEdb 2.0
E106	Colon	H3K9me3	Roadmap	BSS00101	B-cell	Epimap	SE_00_0057	Heart	SEdb 2.0
E106	Colon	H3K27ac	Roadmap	BSS00095	B-cell	Epimap	SE_02_0887	Heart	SEdb 2.0
E106	Colon	H3K27me3	Roadmap	BSS01217	Breast	Epimap	SE_02_0888	Heart	SEdb 2.0
E106	Colon	H3K36me3	Roadmap	BSS00145	Breast	Epimap	SE_02_0889	Heart	SEdb 2.0
E079	Esophagus	H3K4me1	Roadmap	BSS00146	Breast	Epimap	SE_02_0890	Heart	SEdb 2.0
E079	Esophagus	H3K4me3	Roadmap	BSS00332	Breast	Epimap	SE_02_0891	Heart	SEdb 2.0
E079	Esophagus	H3K9me3	Roadmap	BSS00333	Breast	Epimap	SE_02_0325	Liver	SEdb 2.0
E079	Esophagus	H3K27ac	Roadmap	BSS00343	Breast	Epimap	SE_02_0326	Liver	SEdb 2.0
E079	Esophagus	H3K27me3	Roadmap	BSS01224	Breast	Epimap	SE_02_0327	Liver	SEdb 2.0
E079	Esophagus	H3K36me3	Roadmap	BSS01225	Breast	Epimap	SE_02_1133	Liver	SEdb 2.0
E083	Heart	H3K4me1	Roadmap	BSS01209	Breast	Epimap	SE_02_1299	Liver	SEdb 2.0
E083	Heart	H3K4me3	Roadmap	BSS01211	Breast	Epimap	SE_00_0021	Lung	SEdb 2.0
E083	Heart	H3K9me3	Roadmap	BSS01213	Breast	Epimap	SE_00_0022	Lung	SEdb 2.0
1038400;1038420	Heart	H3K27ac	CistromeDB	BSS01185	Breast	Epimap	SE_01_0029	Lung	SEdb 2.0
E083	Heart	H3K27me3	Roadmap	BSS01340	Breast	Epimap	SE_01_0104	Lung	SEdb 2.0
E083	Heart	H3K36me3	Roadmap	BSS01341	Breast	Epimap	SE_01_0117	Lung	SEdb 2.0
E083	Heart	H3K9ac	Encode	BSS01285	Colon	Epimap	SE_00_0029	Ovary	SEdb 2.0
E066	Liver	H3K4me1	Roadmap	BSS01848	Colon	Epimap	SE_00_0030	Pancreas	SEdb 2.0
E066	Liver	H3K4me3	Roadmap	BSS01851	Colon	Epimap	SE_00_0054	Pancreas	SEdb 2.0
E066	Liver	H3K9ac	Roadmap	BSS00223	Colon	Epimap	SE_01_0101	Pancreas	SEdb 2.0
E066	Liver	H3K9me3	Roadmap	BSS01849	Colon	Epimap	SE_01_0103	Pancreas	SEdb 2.0
E066	Liver	H3K27ac	Roadmap	BSS01850	Colon	Epimap	SE_02_0032	Pancreas	SEdb 2.0
E066	Liver	H3K27me3	Roadmap	BSS01286	Colon	Epimap	SE_02_0033	Pancreas	SEdb 2.0
E066	Liver	H3K36me3	Roadmap	BSS01288	Colon	Epimap	SE_00_0031	Placenta	SEdb 2.0
E096	Lung	H3K4me1	Roadmap	BSS01287	Colon	Epimap	SE_00_0039	Spleen	SEdb 2.0
E096	Lung	H3K4me3	Roadmap	BSS01542	Colon	Epimap	SE_00_0040	Spleen	SEdb 2.0
E096	Lung	H3K9me3	Roadmap	BSS01547	Colon	Epimap	SE_00_0055	Spleen	SEdb 2.0
E096	Lung	H3K27ac	Roadmap	BSS01548	Colon	Epimap	SE_01_0084	Spleen	SEdb 2.0
E096	Lung	H3K27me3	Roadmap	BSS01545	Colon	Epimap	SE_00_0041	Stomach	SEdb 2.0
E096	Lung	H3K36me3	Roadmap	BSS01543	Colon	Epimap	SE_00_0042	Stomach	SEdb 2.0
E097	Ovary	H3K4me1	Roadmap	BSS00316	Esophagus	Epimap	SE_00_0043	Stomach	SEdb 2.0
E097	Ovary	H3K4me3	Roadmap	BSS00307	Esophagus	Epimap	SE_00_0058	Stomach	SEdb 2.0
E097	Ovary	H3K9me3	Roadmap	BSS00318	Esophagus	Epimap	SE_01_0085	Stomach	SEdb 2.0
E097	Ovary	H3K27ac	Roadmap	BSS00326	Esophagus	Epimap	SE_02_0827	Stomach	SEdb 2.0
E097	Ovary	H3K27me3	Roadmap	BSS00325	Esophagus	Epimap	SE_00_0045	Thymus	SEdb 2.0
E097	Ovary	H3K36me3	Roadmap	BSS00381	Esophagus	Epimap	SE_01_0087	Thyroid	SEdb 2.0
E098	Pancreas	H3K4me1	Roadmap	BSS00505	Heart	Epimap	SE_01_0100	Thyroid	SEdb 2.0
E098	Pancreas	H3K4me3	Roadmap	BSS00518	Heart	Epimap	SE_01_0105	Thyroid	SEdb 2.0
E098	Pancreas	H3K9me3	Roadmap	BSS00519	Heart	Epimap	SE_00_0008	T-cell	SEdb 2.0
E098	Pancreas	H3K27ac	Roadmap	BSS00514	Heart	Epimap	SE_00_0009	T-cell	SEdb 2.0
E098	Pancreas	H3K27me3	Roadmap	BSS00520	Heart	Epimap	SE_00_0044	T-cell	SEdb 2.0
E098	Pancreas	H3K36me3	Roadmap	BSS00495	Heart	Epimap	SE_02_0147	T-cell	SEdb 2.0
ENCFF186SGV	Placenta	H3K4me1	ENCODE	BSS00496	Heart	Epimap	SE_02_1270	T-cell	SEdb 2.0
ENCFF103HKS	Placenta	H3K4me3	ENCODE	BSS00494	Heart	Epimap
ENCFF924UHU	Placenta	H3K9me3	ENCODE	BSS00521	Heart	Epimap
ENCFF018QRH	Placenta	H3K27ac	ENCODE	BSS00517	Heart	Epimap
ENCFF752WHR	Placenta	H3K27me3	ENCODE	BSS00493	Heart	Epimap
ENCFF298RQD	Placenta	H3K36me3	ENCODE	BSS00498	Heart	Epimap
E113	Spleen	H3K4me1	Roadmap	BSS01127	Heart	Epimap
E113	Spleen	H3K4me3	Roadmap	BSS01506	Heart	Epimap
E113	Spleen	H3K9me3	Roadmap	BSS01508	Heart	Epimap
E113	Spleen	H3K27ac	Roadmap	BSS01507	Heart	Epimap
E113	Spleen	H3K27me3	Roadmap	BSS00499	Heart	Epimap
E113	Spleen	H3K36me3	Roadmap	BSS00500	Heart	Epimap
E092	Stomach	H3K4me1	Roadmap	BSS00502	Heart	Epimap
E092	Stomach	H3K4me3	Roadmap	BSS00503	Heart	Epimap
E092	Stomach	H3K9me3	Roadmap	BSS00501	Heart	Epimap
E092	Stomach	H3K27ac	Roadmap	BSS00516	Heart	Epimap
E092	Stomach	H3K27me3	Roadmap	BSS00522	Heart	Epimap
E092	Stomach	H3K36me3	Roadmap	BSS01519	Liver	Epimap
E038	T-cell	H3K4me1	Roadmap	BSS01158	Liver	Epimap
E038	T-cell	H3K4me3	Roadmap	BSS00553	Liver	Epimap
E038	T-cell	H3K9ac	Roadmap	BSS00554	Liver	Epimap
E038	T-cell	H3K9me3	Roadmap	BSS00511	Liver	Epimap
E038	T-cell	H3K27ac	Roadmap	BSS01164	Liver	Epimap
E038	T-cell	H3K27me3	Roadmap	BSS01170	Liver	Epimap
E038	T-cell	H3K36me3	Roadmap	BSS01169	Liver	Epimap
E112	Thymus	H3K4me1	Roadmap	BSS01159	Liver	Epimap
E112	Thymus	H3K4me3	Roadmap	BSS01168	Liver	Epimap
E112	Thymus	H3K9me3	Roadmap	BSS01138	Lung	Epimap
E112	Thymus	H3K27ac	Roadmap	BSS01521	Lung	Epimap
E112	Thymus	H3K27me3	Roadmap	BSS01139	Lung	Epimap
E112	Thymus	H3K36me3	Roadmap	BSS01192	Lung	Epimap
ENCFF889HRY	Thyroid gland	H3K4me1	ENCODE	BSS01522	Lung	Epimap
ENCFF874DLO	Thyroid gland	H3K4me3	ENCODE	BSS01140	Lung	Epimap
ENCFF003DBJ	Thyroid gland	H3K9me3	ENCODE	BSS01523	Lung	Epimap
ENCFF234MNW	Thyroid gland	H3K27ac	ENCODE	BSS01141	Lung	Epimap
ENCFF166QLV	Thyroid gland	H3K27me3	ENCODE	BSS01524	Lung	Epimap
ENCFF921WSE	Thyroid gland	H3K36me3	ENCODE	BSS01205	Lung	Epimap
				BSS01147	Lung	Epimap
				BSS01529	Lung	Epimap
				BSS01148	Lung	Epimap
				BSS01149	Lung	Epimap
				BSS01530	Lung	Epimap
				BSS01202	Lung	Epimap
				BSS01144	Lung	Epimap
				BSS01527	Lung	Epimap
				BSS01203	Lung	Epimap
				BSS01145	Lung	Epimap
				BSS01195	Lung	Epimap
				BSS01146	Lung	Epimap
				BSS01528	Lung	Epimap
				BSS01204	Lung	Epimap
				BSS01189	Lung	Epimap
				BSS01188	Lung	Epimap
				BSS01187	Lung	Epimap
				BSS01198	Lung	Epimap
				BSS01186	Lung	Epimap
				BSS01869	Lung	Epimap
				BSS01196	Lung	Epimap
				BSS01142	Lung	Epimap
				BSS01197	Lung	Epimap
				BSS01871	Lung	Epimap
				BSS01201	Lung	Epimap
				BSS01190	Lung	Epimap
				BSS01870	Lung	Epimap
				BSS01193	Lung	Epimap
				BSS01525	Lung	Epimap
				BSS01143	Lung	Epimap
				BSS01526	Lung	Epimap
				BSS01137	Lung	Epimap
				BSS01520	Lung	Epimap
				BSS01403	Ovary	Epimap
				BSS01401	Ovary	Epimap
				BSS01402	Ovary	Epimap
				BSS01399	Ovary	Epimap
				BSS00121	Pancreas	Epimap
				BSS00282	Pancreas	Epimap
				BSS00703	Pancreas	Epimap
				BSS00283	Pancreas	Epimap
				BSS00122	Pancreas	Epimap
				BSS00284	Pancreas	Epimap
				BSS00281	Pancreas	Epimap
				BSS00123	Pancreas	Epimap
				BSS00124	Pancreas	Epimap
				BSS00758	Pancreas	Epimap
				BSS01406	Pancreas	Epimap
				BSS01407	Pancreas	Epimap
				BSS01440	Placenta	Epimap
				BSS01448	Placenta	Epimap
				BSS01446	Placenta	Epimap
				BSS01441	Placenta	Epimap
				BSS01431	Placenta	Epimap
				BSS01438	Placenta	Epimap
				BSS00714	Placenta	Epimap
				BSS01856	Placenta	Epimap
				BSS01853	Placenta	Epimap
				BSS01855	Placenta	Epimap
				BSS01852	Placenta	Epimap
				BSS01436	Placenta	Epimap
				BSS01859	Placenta	Epimap
				BSS01860	Placenta	Epimap
				BSS01437	Placenta	Epimap
				BSS01435	Placenta	Epimap
				BSS01443	Placenta	Epimap
				BSS01444	Placenta	Epimap
				BSS01433	Placenta	Epimap
				BSS01432	Placenta	Epimap
				BSS01430	Placenta	Epimap
				BSS01625	Spleen	Epimap
				BSS01628	Spleen	Epimap
				BSS01633	Spleen	Epimap
				BSS01634	Spleen	Epimap
				BSS01631	Spleen	Epimap
				BSS01630	Spleen	Epimap
				BSS01660	Stomach	Epimap
				BSS01649	Stomach	Epimap
				BSS01654	Stomach	Epimap
				BSS01651	Stomach	Epimap
				BSS01639	Stomach	Epimap
				BSS01642	Stomach	Epimap
				BSS01643	Stomach	Epimap
				BSS01644	Stomach	Epimap
				BSS01646	Stomach	Epimap
				BSS01647	Stomach	Epimap
				BSS01641	Stomach	Epimap
				BSS01659	Stomach	Epimap
				BSS01658	Stomach	Epimap
				BSS01655	Stomach	Epimap
				BSS01637	Stomach	Epimap
				BSS01656	Stomach	Epimap
				BSS01657	Stomach	Epimap
				BSS01636	Stomach	Epimap
				BSS01638	Stomach	Epimap
				BSS01650	Stomach	Epimap
				BSS01653	Stomach	Epimap
				BSS00188	T-cell	Epimap
				BSS01687	T-cell	Epimap
				BSS01689	T-cell	Epimap
				BSS00185	T-cell	Epimap
				BSS01684	T-cell	Epimap
				BSS01691	T-cell	Epimap
				BSS01692	T-cell	Epimap
				BSS01690	T-cell	Epimap
				BSS01693	T-cell	Epimap
				BSS01694	T-cell	Epimap
				BSS01695	T-cell	Epimap
				BSS00195	T-cell	Epimap
				BSS01697	T-cell	Epimap
				BSS01698	T-cell	Epimap
				BSS01696	T-cell	Epimap
				BSS00189	T-cell	Epimap
				BSS00190	T-cell	Epimap
				BSS00183	T-cell	Epimap
				BSS00186	T-cell	Epimap
				BSS00191	T-cell	Epimap
				BSS00192	T-cell	Epimap
				BSS00274	T-cell	Epimap
				BSS00196	T-cell	Epimap
				BSS01347	T-cell	Epimap
				BSS01348	T-cell	Epimap
				BSS01346	T-cell	Epimap
				BSS00198	T-cell	Epimap
				BSS00200	T-cell	Epimap
				BSS00193	T-cell	Epimap
				BSS00194	T-cell	Epimap
				BSS00197	T-cell	Epimap
				BSS01688	T-cell	Epimap
				BSS01824	Thymus	Epimap
				BSS01820	Thymus	Epimap
				BSS01825	Thymus	Epimap
				BSS01819	Thymus	Epimap
				BSS01821	Thymus	Epimap
				BSS01823	Thymus	Epimap
				BSS01818	Thymus	Epimap
				BSS01826	Thymus	Epimap
				BSS01827	Thymus	Epimap
				BSS01828	Thymus	Epimap
				BSS01829	Thymus	Epimap
				BSS01831	Thyroid gland	Epimap
				BSS01834	Thyroid gland	Epimap
				BSS01832	Thyroid gland	Epimap
				BSS01835	Thyroid gland	Epimap

## Sheet: TF ChIP-seq
Tissue	TF	GEO
Adipose	CTCF	GSM2828883
Adrenal gland	POLR2A	GSM2825408
Adrenal gland	CTCF	GSM2828999
B-celll	CTCF	GSE208512
Breast	POLR2A	GSM2826022
Breast	CTCF	GSM2827153
Colon	CTCF	GSM2825505
Colon	EP300	GSM2827193
Colon	POLR2A	GSM2828536
Esophagus	POLR2A	GSM2825487
Esophagus	CTCF	GSM2828903
Heart	POLR2A	GSM2827253
Heart	CTCF	GSM3634158
Liver	HNF4G	GSE105440
Liver	FOX2	GSE105487
Liver	EGR1	GSE127464
Liver	GABPA	GSE95893
Liver	YY1	GSE96146
Liver	ATF3	GSE96190
Liver	ZBTB3	GSE96207
Liver	MAX	GSE96215
Liver	HNF4A	GSE96260
Liver	FOX1	GSE96344
Liver	JUND	GSE96409
Liver	RAD21	GSE96469
Liver	REST	GSM2828987
Liver	NR2F2	GSE96124
Lung	POLR2A	GSM2825421
Lung	EP300	GSM2828636
Lung	CTCF	GSM2828718
Ovary	EP300	GSM2827525
Ovary	CTCF	GSM2827573
Ovary	POLR2A	GSM2828850
Pancreas	CTCF	GSM2827130
Pancreas	POLR2A	GSM2827194
Placenta	CTCF	GSE209109
Spleen	CTCF	GSE142933
Spleen	PLOR2A	GSM2825958
Stomach	POLR2A	GSM2825446
Stomach	EP300	GSM2827476
Stomach	CTCF	GSM2827524
T-cell	CTCF	GSE209390
Thyroid	POLR2A	GSM2827286
Thyroid	CTCF	GSM2827572

## Sheet: preimplantation embryos
Single-cell BS-seq			Bulk BS-seq			GCH methylation
GSM	Stage	Data source	Sample name	SRX	Stage	GSM	Stage
GSM2481535	2-cell	scMethBank	GSM1207801	SRX334140	2-cell	GSM2676907	Sperm
GSM2833024	2-cell	scMethBank	GSM1207802	SRX334141	2-cell	GSM2676908	Sperm
GSM2833025	2-cell	scMethBank	GSM1207803	SRX334142	4-cell	GSM2676909	Sperm
GSM2833026	2-cell	scMethBank	GSM1207804	SRX334143	4-cell	GSM2741038	Sperm
GSM2833027	2-cell	scMethBank	GSM1207805	SRX334144	8-cell	GSM2741039	Sperm
GSM2833028	2-cell	scMethBank	GSM1207806	SRX334145	8-cell	GSM2741040	Sperm
GSM2833029	2-cell	scMethBank	GSM1207807	SRX334146	8-cell	GSM2741041	Sperm
GSM2833030	2-cell	scMethBank	GSM1207808	SRX334147	8-cell	GSM2741042	Sperm
GSM2833031	2-cell	scMethBank	GSM1207809	SRX334148	8-cell	GSM2741043	Sperm
GSM2833032	2-cell	scMethBank	GSM1207810	SRX334149	8-cell	GSM2741044	Sperm
GSM2833033	2-cell	scMethBank	GSM1207838	SRX334175	Zygote	GSM2741045	Sperm
GSM2833034	2-cell	scMethBank	GSM1207839	SRX334176	Zygote	GSM2741046	Sperm
GSM2833035	2-cell	scMethBank	GSM1207817	SRX334156	Morula	GSM2741047	Sperm
GSM2833036	2-cell	scMethBank	GSM1207818	SRX334157	Morula	GSM2833005	Oocyte
GSM2833037	2-cell	scMethBank	GSM1207819	SRX334158	Morula	GSM2833006	Oocyte
GSM2986343	2-cell	scMethBank	GSM1207820	SRX334159	Morula	GSM2833007	Oocyte
GSM2986344	2-cell	scMethBank	GSM1207821	SRX334134	Morula	GSM2833008	Oocyte
GSM2986345	2-cell	scMethBank	GSM1207822	SRX334135	Morula	GSM2833009	Oocyte
GSM2986346	2-cell	scMethBank	GSM1207829	SRX334166	Sperm	GSM2833010	Oocyte
GSM2986347	2-cell	scMethBank	GSM1207830	SRX334167	Sperm	GSM2833011	Oocyte
GSM2986348	2-cell	scMethBank	GSM1207831	SRX334168	Sperm	GSM2833012	Oocyte
GSM2986349	2-cell	scMethBank	GSM1207832	SRX334169	Sperm	GSM2833013	Oocyte
GSM2986350	2-cell	scMethBank	GSM1207811	SRX334150	ICM	GSM2833014	Zygote
GSM2986351	2-cell	scMethBank	GSM1207812	SRX334151	ICM	GSM2833015	Zygote
GSM2986352	2-cell	scMethBank	GSM1207813	SRX334152	ICM	GSM2833016	Zygote
GSM2986353	2-cell	scMethBank	GSM1207814	SRX334153	ICM	GSM2833017	Zygote
GSM2986354	2-cell	scMethBank	GSM1207815	SRX334154	Oocyte	GSM2833018	Zygote
GSM2986355	2-cell	scMethBank	GSM1207816	SRX334155	Oocyte	GSM2833019	Zygote
GSM2986356	2-cell	scMethBank	GSM1207833	SRX334170	TE	GSM2833020	Zygote
GSM2986357	2-cell	scMethBank	GSM1207834	SRX334171	TE	GSM2833021	Zygote
GSM2986358	2-cell	scMethBank	GSM1207835	SRX334172	TE	GSM2833022	Zygote
GSM2986359	2-cell	scMethBank	GSM1207836	SRX334173	TE	GSM2833023	Zygote
GSM2481536	4-cell	scMethBank	GSM1207837	SRX334174	TE	GSM2833024	2-cell
GSM2481537	4-cell	scMethBank	GSM1207823	SRX334160	postimplantation embryo	GSM2833025	2-cell
GSM2481538	4-cell	scMethBank	GSM1207824	SRX334161	postimplantation embryo	GSM2833026	2-cell
GSM2481539	4-cell	scMethBank	GSM1207825	SRX334162	postimplantation embryo	GSM2833027	2-cell
GSM2481540	4-cell	scMethBank	GSM1207826	SRX334163	postimplantation embryo	GSM2833028	2-cell
GSM2481541	4-cell	scMethBank	GSM1207827	SRX334164	postimplantation embryo	GSM2833029	2-cell
GSM2481542	4-cell	scMethBank	GSM1207828	SRX334165	postimplantation embryo	GSM2833030	2-cell
GSM2481543	4-cell	scMethBank				GSM2833031	2-cell
GSM2481544	4-cell	scMethBank				GSM2833032	2-cell
GSM2481545	4-cell	scMethBank				GSM2833033	2-cell
GSM2481546	4-cell	scMethBank				GSM2833034	2-cell
GSM2481547	4-cell	scMethBank				GSM2833035	2-cell
GSM2481548	4-cell	scMethBank				GSM2833036	2-cell
GSM2481549	4-cell	scMethBank				GSM2833037	2-cell
GSM2481550	4-cell	scMethBank				GSM2833102	8-cell
GSM2481551	4-cell	scMethBank				GSM2833103	8-cell
GSM2481552	4-cell	scMethBank				GSM2833104	8-cell
GSM2833038	4-cell	scMethBank				GSM2833105	8-cell
GSM2833039	4-cell	scMethBank				GSM2833106	8-cell
GSM2833040	4-cell	scMethBank				GSM2833107	8-cell
GSM2833041	4-cell	scMethBank				GSM2833108	8-cell
GSM2833042	4-cell	scMethBank				GSM2833109	8-cell
GSM2833043	4-cell	scMethBank				GSM2833110	8-cell
GSM2833044	4-cell	scMethBank				GSM2833111	8-cell
GSM2833045	4-cell	scMethBank				GSM2833098	8-cell
GSM2833046	4-cell	scMethBank				GSM2833099	8-cell
GSM2833047	4-cell	scMethBank				GSM2833100	8-cell
GSM2833048	4-cell	scMethBank				GSM2833101	8-cell
GSM2833049	4-cell	scMethBank				GSM2833187	TE
GSM2833050	4-cell	scMethBank				GSM2833188	TE
GSM2833051	4-cell	scMethBank				GSM2833189	TE
GSM2833052	4-cell	scMethBank				GSM2833190	TE
GSM2833053	4-cell	scMethBank				GSM2833191	TE
GSM2833054	4-cell	scMethBank				GSM2833192	TE
GSM2833055	4-cell	scMethBank				GSM2833193	TE
GSM2833056	4-cell	scMethBank				GSM2833194	TE
GSM2833057	4-cell	scMethBank				GSM2833195	TE
GSM2833058	4-cell	scMethBank				GSM2833196	TE
GSM2833059	4-cell	scMethBank				GSM2833197	TE
GSM2833060	4-cell	scMethBank				GSM2833198	TE
GSM2833061	4-cell	scMethBank				GSM2833199	TE
GSM2833062	4-cell	scMethBank				GSM2833200	TE
GSM2833063	4-cell	scMethBank				GSM2833201	TE
GSM2986360	4-cell	scMethBank				GSM2833202	TE
GSM2986361	4-cell	scMethBank				GSM2833203	TE
GSM2986362	4-cell	scMethBank				GSM2833204	TE
GSM2986363	4-cell	scMethBank				GSM2833205	TE
GSM2986365	4-cell	scMethBank				GSM2833206	TE
GSM2481618	8-cell	scMethBank				GSM2833207	TE
GSM2481619	8-cell	scMethBank				GSM2833208	TE
GSM2481620	8-cell	scMethBank				GSM2833209	TE
GSM2481621	8-cell	scMethBank				GSM2833210	TE
GSM2481622	8-cell	scMethBank				GSM2833211	TE
GSM2481623	8-cell	scMethBank				GSM2833212	TE
GSM2481624	8-cell	scMethBank				GSM2833213	TE
GSM2481625	8-cell	scMethBank				GSM2833214	TE
GSM2481626	8-cell	scMethBank				GSM2833215	TE
GSM2481627	8-cell	scMethBank				GSM2833216	TE
GSM2481628	8-cell	scMethBank				GSM2833217	TE
GSM2481629	8-cell	scMethBank				GSM2833218	TE
GSM2481630	8-cell	scMethBank				GSM2833219	TE
GSM2481631	8-cell	scMethBank				GSM2833220	TE
GSM2481632	8-cell	scMethBank				GSM2833221	TE
GSM2481633	8-cell	scMethBank				GSM2833222	TE
GSM2481634	8-cell	scMethBank				GSM2833223	TE
GSM2481635	8-cell	scMethBank				GSM2833224	TE
GSM2481636	8-cell	scMethBank				GSM2833225	TE
GSM2481637	8-cell	scMethBank				GSM2833226	TE
GSM2481638	8-cell	scMethBank				GSM2833227	TE
GSM2481639	8-cell	scMethBank				GSM2833228	TE
GSM2481640	8-cell	scMethBank				GSM2833229	TE
GSM2481641	8-cell	scMethBank				GSM2833230	TE
GSM2481642	8-cell	scMethBank				GSM2833231	TE
GSM2481643	8-cell	scMethBank				GSM2833232	TE
GSM2833064	8-cell	scMethBank				GSM2833233	TE
GSM2833065	8-cell	scMethBank				GSM2833234	TE
GSM2833066	8-cell	scMethBank				GSM2833038	4-cell
GSM2833067	8-cell	scMethBank				GSM2833039	4-cell
GSM2833068	8-cell	scMethBank				GSM2833040	4-cell
GSM2833069	8-cell	scMethBank				GSM2833041	4-cell
GSM2833070	8-cell	scMethBank				GSM2833042	4-cell
GSM2833071	8-cell	scMethBank				GSM2833043	4-cell
GSM2833072	8-cell	scMethBank				GSM2833044	4-cell
GSM2833073	8-cell	scMethBank				GSM2833045	4-cell
GSM2833074	8-cell	scMethBank				GSM2833046	4-cell
GSM2833075	8-cell	scMethBank				GSM2833047	4-cell
GSM2833076	8-cell	scMethBank				GSM2833048	4-cell
GSM2833077	8-cell	scMethBank				GSM2833049	4-cell
GSM2833078	8-cell	scMethBank				GSM2833050	4-cell
GSM2833079	8-cell	scMethBank				GSM2833051	4-cell
GSM2833080	8-cell	scMethBank				GSM2833052	4-cell
GSM2833081	8-cell	scMethBank				GSM2833053	4-cell
GSM2833082	8-cell	scMethBank				GSM2833054	4-cell
GSM2833083	8-cell	scMethBank				GSM2833055	4-cell
GSM2833084	8-cell	scMethBank				GSM2833056	4-cell
GSM2833085	8-cell	scMethBank				GSM2833057	4-cell
GSM2833086	8-cell	scMethBank				GSM2833058	4-cell
GSM2833087	8-cell	scMethBank				GSM2833059	4-cell
GSM2833088	8-cell	scMethBank				GSM2833060	4-cell
GSM2833089	8-cell	scMethBank				GSM2833061	4-cell
GSM2833090	8-cell	scMethBank				GSM2833062	4-cell
GSM2833091	8-cell	scMethBank				GSM2833063	4-cell
GSM2833092	8-cell	scMethBank				GSM2833064	8-cell
GSM2833093	8-cell	scMethBank				GSM2833065	8-cell
GSM2833094	8-cell	scMethBank				GSM2833066	8-cell
GSM2833095	8-cell	scMethBank				GSM2833067	8-cell
GSM2833096	8-cell	scMethBank				GSM2833068	8-cell
GSM2833097	8-cell	scMethBank				GSM2833069	8-cell
GSM2833098	8-cell	scMethBank				GSM2833070	8-cell
GSM2833099	8-cell	scMethBank				GSM2833071	8-cell
GSM2833100	8-cell	scMethBank				GSM2833072	8-cell
GSM2833101	8-cell	scMethBank				GSM2833073	8-cell
GSM2833102	8-cell	scMethBank				GSM2833074	8-cell
GSM2833103	8-cell	scMethBank				GSM2833075	8-cell
GSM2833104	8-cell	scMethBank				GSM2833076	8-cell
GSM2833105	8-cell	scMethBank				GSM2833077	8-cell
GSM2833106	8-cell	scMethBank				GSM2833078	8-cell
GSM2833107	8-cell	scMethBank				GSM2833079	8-cell
GSM2833108	8-cell	scMethBank				GSM2833080	8-cell
GSM2833109	8-cell	scMethBank				GSM2833081	8-cell
GSM2833110	8-cell	scMethBank				GSM2833082	8-cell
GSM2833111	8-cell	scMethBank				GSM2833083	8-cell
GSM2986368	8-cell	scMethBank				GSM2833084	8-cell
GSM2986369	8-cell	scMethBank				GSM2833085	8-cell
GSM2986370	8-cell	scMethBank				GSM2833086	8-cell
GSM2986371	8-cell	scMethBank				GSM2833087	8-cell
GSM2986372	8-cell	scMethBank				GSM2833088	8-cell
GSM2986373	8-cell	scMethBank				GSM2833089	8-cell
GSM2986374	8-cell	scMethBank				GSM2833090	8-cell
GSM2986375	8-cell	scMethBank				GSM2833091	8-cell
GSM2986376	8-cell	scMethBank				GSM2833092	8-cell
GSM2986377	8-cell	scMethBank				GSM2833093	8-cell
GSM2986378	8-cell	scMethBank				GSM2833094	8-cell
GSM2986379	8-cell	scMethBank				GSM2833095	8-cell
GSM2986380	8-cell	scMethBank				GSM2833096	8-cell
GSM2986381	8-cell	scMethBank				GSM2833097	8-cell
GSM2986382	8-cell	scMethBank				GSM2833112	Morula
GSM2986383	8-cell	scMethBank				GSM2833113	Morula
GSM2986384	8-cell	scMethBank				GSM2833114	Morula
GSM2986385	8-cell	scMethBank				GSM2833115	Morula
GSM2986386	8-cell	scMethBank				GSM2833116	Morula
GSM2986387	8-cell	scMethBank				GSM2833117	Morula
GSM2986388	8-cell	scMethBank				GSM2833118	Morula
GSM2986389	8-cell	scMethBank				GSM2833119	Morula
GSM2991554	8-cell	scMethBank				GSM2833120	Morula
GSM2991555	8-cell	scMethBank				GSM2833121	Morula
GSM2991556	8-cell	scMethBank				GSM2833122	Morula
GSM2991557	8-cell	scMethBank				GSM2833123	Morula
GSM2991558	8-cell	scMethBank				GSM2833124	Morula
GSM2991559	8-cell	scMethBank				GSM2833125	Morula
GSM2991560	8-cell	scMethBank				GSM2833126	Morula
GSM2991561	8-cell	scMethBank				GSM2833127	Morula
GSM2991562	8-cell	scMethBank				GSM2833128	Morula
GSM2991563	8-cell	scMethBank				GSM2833129	Morula
GSM2991564	8-cell	scMethBank				GSM2833130	Morula
GSM2991565	8-cell	scMethBank				GSM2833131	Morula
GSM2991566	8-cell	scMethBank				GSM2833132	Morula
GSM2991567	8-cell	scMethBank				GSM2833133	Morula
GSM2991568	8-cell	scMethBank				GSM2833134	Morula
GSM2991569	8-cell	scMethBank				GSM2833135	Morula
GSM2991570	8-cell	scMethBank				GSM2833136	Morula
GSM2991571	8-cell	scMethBank				GSM2833137	ICM
GSM2991572	8-cell	scMethBank				GSM2833138	ICM
GSM2481597	ICM	scMethBank				GSM2833139	ICM
GSM2481598	ICM	scMethBank				GSM2833140	ICM
GSM2481599	ICM	scMethBank				GSM2833141	ICM
GSM2481600	ICM	scMethBank				GSM2833142	ICM
GSM2481601	ICM	scMethBank				GSM2833143	ICM
GSM2481603	ICM	scMethBank				GSM2833144	ICM
GSM2481604	ICM	scMethBank				GSM2833145	ICM
GSM2481605	ICM	scMethBank				GSM2833146	ICM
GSM2481606	ICM	scMethBank				GSM2833147	ICM
GSM2481607	ICM	scMethBank				GSM2833148	ICM
GSM2773567	ICM	scMethBank				GSM2833149	ICM
GSM2773568	ICM	scMethBank				GSM2833150	ICM
GSM2773569	ICM	scMethBank				GSM2833151	ICM
GSM2773570	ICM	scMethBank				GSM2833152	ICM
GSM2773571	ICM	scMethBank				GSM2833153	ICM
GSM2773572	ICM	scMethBank				GSM2833154	ICM
GSM2773573	ICM	scMethBank				GSM2833155	ICM
GSM2773574	ICM	scMethBank				GSM2833156	ICM
GSM2773575	ICM	scMethBank				GSM2833157	ICM
GSM2773576	ICM	scMethBank				GSM2833158	ICM
GSM2773579	ICM	scMethBank				GSM2833159	ICM
GSM2773580	ICM	scMethBank				GSM2833160	ICM
GSM2773581	ICM	scMethBank				GSM2833161	ICM
GSM2773582	ICM	scMethBank				GSM2833162	ICM
GSM2773583	ICM	scMethBank				GSM2833163	ICM
GSM2773584	ICM	scMethBank				GSM2833164	ICM
GSM2773585	ICM	scMethBank				GSM2833165	ICM
GSM2773587	ICM	scMethBank				GSM2833166	ICM
GSM2773588	ICM	scMethBank				GSM2833167	ICM
GSM2773589	ICM	scMethBank				GSM2833168	ICM
GSM2773590	ICM	scMethBank				GSM2833169	ICM
GSM2773591	ICM	scMethBank				GSM2833170	ICM
GSM2773592	ICM	scMethBank				GSM2833171	ICM
GSM2773593	ICM	scMethBank				GSM2833172	ICM
GSM2773596	ICM	scMethBank				GSM2833173	ICM
GSM2773597	ICM	scMethBank				GSM2833174	ICM
GSM2773598	ICM	scMethBank				GSM2833175	ICM
GSM2773599	ICM	scMethBank				GSM2833176	ICM
GSM2773602	ICM	scMethBank				GSM2833177	ICM
GSM2773603	ICM	scMethBank				GSM2833178	ICM
GSM2773604	ICM	scMethBank				GSM2833179	ICM
GSM2773605	ICM	scMethBank				GSM2833180	ICM
GSM2773606	ICM	scMethBank				GSM2833181	ICM
GSM2773607	ICM	scMethBank				GSM2833182	ICM
GSM2773608	ICM	scMethBank				GSM2833183	ICM
GSM2773609	ICM	scMethBank				GSM2833185	ICM
GSM2773610	ICM	scMethBank				GSM2833184	ICM
GSM2773611	ICM	scMethBank				GSM2833186	ICM
GSM2773612	ICM	scMethBank
GSM2773613	ICM	scMethBank
GSM2773614	ICM	scMethBank
GSM2773615	ICM	scMethBank
GSM2773616	ICM	scMethBank
GSM2773617	ICM	scMethBank
GSM2773618	ICM	scMethBank
GSM2773619	ICM	scMethBank
GSM2773620	ICM	scMethBank
GSM2773621	ICM	scMethBank
GSM2773622	ICM	scMethBank
GSM2773623	ICM	scMethBank
GSM2773624	ICM	scMethBank
GSM2773625	ICM	scMethBank
GSM2773626	ICM	scMethBank
GSM2773627	ICM	scMethBank
GSM2773628	ICM	scMethBank
GSM2773629	ICM	scMethBank
GSM2773630	ICM	scMethBank
GSM2773631	ICM	scMethBank
GSM2773632	ICM	scMethBank
GSM2773633	ICM	scMethBank
GSM2773634	ICM	scMethBank
GSM2773635	ICM	scMethBank
GSM2773636	ICM	scMethBank
GSM2773637	ICM	scMethBank
GSM2773638	ICM	scMethBank
GSM2773639	ICM	scMethBank
GSM2773640	ICM	scMethBank
GSM2773641	ICM	scMethBank
GSM2773642	ICM	scMethBank
GSM2773643	ICM	scMethBank
GSM2773644	ICM	scMethBank
GSM2773645	ICM	scMethBank
GSM2773646	ICM	scMethBank
GSM2773647	ICM	scMethBank
GSM2773648	ICM	scMethBank
GSM2773649	ICM	scMethBank
GSM2773650	ICM	scMethBank
GSM2773653	ICM	scMethBank
GSM2773654	ICM	scMethBank
GSM2773655	ICM	scMethBank
GSM2773658	ICM	scMethBank
GSM2773659	ICM	scMethBank
GSM2773660	ICM	scMethBank
GSM2773661	ICM	scMethBank
GSM2833137	ICM	scMethBank
GSM2833138	ICM	scMethBank
GSM2833139	ICM	scMethBank
GSM2833140	ICM	scMethBank
GSM2833142	ICM	scMethBank
GSM2833143	ICM	scMethBank
GSM2833144	ICM	scMethBank
GSM2833145	ICM	scMethBank
GSM2833146	ICM	scMethBank
GSM2833147	ICM	scMethBank
GSM2833148	ICM	scMethBank
GSM2833149	ICM	scMethBank
GSM2833150	ICM	scMethBank
GSM2833151	ICM	scMethBank
GSM2833154	ICM	scMethBank
GSM2833155	ICM	scMethBank
GSM2833156	ICM	scMethBank
GSM2833157	ICM	scMethBank
GSM2833158	ICM	scMethBank
GSM2833159	ICM	scMethBank
GSM2833160	ICM	scMethBank
GSM2833161	ICM	scMethBank
GSM2833162	ICM	scMethBank
GSM2833163	ICM	scMethBank
GSM2833164	ICM	scMethBank
GSM2833165	ICM	scMethBank
GSM2833166	ICM	scMethBank
GSM2833167	ICM	scMethBank
GSM2833168	ICM	scMethBank
GSM2833169	ICM	scMethBank
GSM2833170	ICM	scMethBank
GSM2833171	ICM	scMethBank
GSM2833172	ICM	scMethBank
GSM2833173	ICM	scMethBank
GSM2833174	ICM	scMethBank
GSM2833175	ICM	scMethBank
GSM2833176	ICM	scMethBank
GSM2833177	ICM	scMethBank
GSM2833178	ICM	scMethBank
GSM2833179	ICM	scMethBank
GSM2833180	ICM	scMethBank
GSM2833181	ICM	scMethBank
GSM2833182	ICM	scMethBank
GSM2833183	ICM	scMethBank
GSM2833184	ICM	scMethBank
GSM2833185	ICM	scMethBank
GSM2833186	ICM	scMethBank
GSM2986396	ICM	scMethBank
GSM2986397	ICM	scMethBank
GSM2986398	ICM	scMethBank
GSM2986399	ICM	scMethBank
GSM2986400	ICM	scMethBank
GSM2146951	Oocyte	scMethBank
GSM2146952	Oocyte	scMethBank
GSM2146953	Oocyte	scMethBank
GSM2146954	Oocyte	scMethBank
GSM2481556	Oocyte	scMethBank
GSM2481557	Oocyte	scMethBank
GSM2481570	Oocyte	scMethBank
GSM2481581	Oocyte	scMethBank
GSM2481586	Oocyte	scMethBank
GSM2481587	Oocyte	scMethBank
GSM2481588	Oocyte	scMethBank
GSM2481589	Oocyte	scMethBank
GSM2481590	Oocyte	scMethBank
GSM2481591	Oocyte	scMethBank
GSM2481614	Oocyte	scMethBank
GSM2481615	Oocyte	scMethBank
GSM2833005	Oocyte	scMethBank
GSM2833006	Oocyte	scMethBank
GSM2833007	Oocyte	scMethBank
GSM2833008	Oocyte	scMethBank
GSM2833009	Oocyte	scMethBank
GSM2833010	Oocyte	scMethBank
GSM2833011	Oocyte	scMethBank
GSM2833012	Oocyte	scMethBank
GSM2833013	Oocyte	scMethBank
GSM2986307	Oocyte	scMethBank
GSM2986308	Oocyte	scMethBank
GSM2986309	Oocyte	scMethBank
GSM2986310	Oocyte	scMethBank
GSM2986311	Oocyte	scMethBank
GSM2986312	Oocyte	scMethBank
GSM2986313	Oocyte	scMethBank
GSM2986314	Oocyte	scMethBank
GSM2986315	Oocyte	scMethBank
GSM2986316	Oocyte	scMethBank
GSM2986317	Oocyte	scMethBank
GSM2986318	Oocyte	scMethBank
GSM2986319	Oocyte	scMethBank
GSM2986320	Oocyte	scMethBank
GSM2986321	Oocyte	scMethBank
GSM2986322	Oocyte	scMethBank
GSM2986323	Oocyte	scMethBank
GSM2986324	Oocyte	scMethBank
GSM2986325	Oocyte	scMethBank
GSM2986326	Oocyte	scMethBank
GSM2481644	Morula	scMethBank
GSM2481645	Morula	scMethBank
GSM2481646	Morula	scMethBank
GSM2481647	Morula	scMethBank
GSM2481648	Morula	scMethBank
GSM2481649	Morula	scMethBank
GSM2773514	Morula	scMethBank
GSM2773515	Morula	scMethBank
GSM2773516	Morula	scMethBank
GSM2773517	Morula	scMethBank
GSM2773518	Morula	scMethBank
GSM2773519	Morula	scMethBank
GSM2773520	Morula	scMethBank
GSM2773521	Morula	scMethBank
GSM2773522	Morula	scMethBank
GSM2773523	Morula	scMethBank
GSM2773524	Morula	scMethBank
GSM2773525	Morula	scMethBank
GSM2773526	Morula	scMethBank
GSM2773527	Morula	scMethBank
GSM2773528	Morula	scMethBank
GSM2773529	Morula	scMethBank
GSM2773530	Morula	scMethBank
GSM2773532	Morula	scMethBank
GSM2773533	Morula	scMethBank
GSM2773534	Morula	scMethBank
GSM2773535	Morula	scMethBank
GSM2773536	Morula	scMethBank
GSM2773537	Morula	scMethBank
GSM2773538	Morula	scMethBank
GSM2773539	Morula	scMethBank
GSM2773540	Morula	scMethBank
GSM2773541	Morula	scMethBank
GSM2773542	Morula	scMethBank
GSM2773543	Morula	scMethBank
GSM2773544	Morula	scMethBank
GSM2773545	Morula	scMethBank
GSM2773546	Morula	scMethBank
GSM2773547	Morula	scMethBank
GSM2481579	Sperm	scMethBank
GSM2481580	Sperm	scMethBank
GSM2481616	Sperm	scMethBank
GSM2481617	Sperm	scMethBank
GSM2481652	Sperm	scMethBank
GSM2481653	Sperm	scMethBank
GSM2481654	Sperm	scMethBank
GSM2481655	Sperm	scMethBank
GSM2481656	Sperm	scMethBank
GSM2481657	Sperm	scMethBank
GSM2481658	Sperm	scMethBank
GSM2481659	Sperm	scMethBank
GSM2481660	Sperm	scMethBank
GSM2481661	Sperm	scMethBank
GSM2481662	Sperm	scMethBank
GSM2481663	Sperm	scMethBank
GSM2481664	Sperm	scMethBank
GSM2481665	Sperm	scMethBank
GSM2481666	Sperm	scMethBank
GSM2481667	Sperm	scMethBank
GSM2676907	Sperm	scMethBank
GSM2676908	Sperm	scMethBank
GSM2676909	Sperm	scMethBank
GSM2741038	Sperm	scMethBank
GSM2741039	Sperm	scMethBank
GSM2741040	Sperm	scMethBank
GSM2741041	Sperm	scMethBank
GSM2741042	Sperm	scMethBank
GSM2741043	Sperm	scMethBank
GSM2741044	Sperm	scMethBank
GSM2741045	Sperm	scMethBank
GSM2741046	Sperm	scMethBank
GSM2741047	Sperm	scMethBank
GSM2986299	Sperm	scMethBank
GSM2986300	Sperm	scMethBank
GSM2986301	Sperm	scMethBank
GSM2481609	TE	scMethBank
GSM2481610	TE	scMethBank
GSM2481611	TE	scMethBank
GSM2481612	TE	scMethBank
GSM2481613	TE	scMethBank
GSM2773663	TE	scMethBank
GSM2773664	TE	scMethBank
GSM2773665	TE	scMethBank
GSM2773666	TE	scMethBank
GSM2773667	TE	scMethBank
GSM2773668	TE	scMethBank
GSM2773670	TE	scMethBank
GSM2773671	TE	scMethBank
GSM2773672	TE	scMethBank
GSM2773673	TE	scMethBank
GSM2773674	TE	scMethBank
GSM2773675	TE	scMethBank
GSM2773676	TE	scMethBank
GSM2773677	TE	scMethBank
GSM2773678	TE	scMethBank
GSM2773681	TE	scMethBank
GSM2773682	TE	scMethBank
GSM2773683	TE	scMethBank
GSM2773684	TE	scMethBank
GSM2773685	TE	scMethBank
GSM2773686	TE	scMethBank
GSM2773687	TE	scMethBank
GSM2773688	TE	scMethBank
GSM2773689	TE	scMethBank
GSM2773691	TE	scMethBank
GSM2773692	TE	scMethBank
GSM2773693	TE	scMethBank
GSM2773694	TE	scMethBank
GSM2773695	TE	scMethBank
GSM2773696	TE	scMethBank
GSM2773699	TE	scMethBank
GSM2773700	TE	scMethBank
GSM2773701	TE	scMethBank
GSM2773702	TE	scMethBank
GSM2773703	TE	scMethBank
GSM2773704	TE	scMethBank
GSM2773705	TE	scMethBank
GSM2773706	TE	scMethBank
GSM2773707	TE	scMethBank
GSM2773708	TE	scMethBank
GSM2773709	TE	scMethBank
GSM2773710	TE	scMethBank
GSM2773711	TE	scMethBank
GSM2773712	TE	scMethBank
GSM2773713	TE	scMethBank
GSM2773714	TE	scMethBank
GSM2773715	TE	scMethBank
GSM2773716	TE	scMethBank
GSM2773717	TE	scMethBank
GSM2773718	TE	scMethBank
GSM2773719	TE	scMethBank
GSM2773720	TE	scMethBank
GSM2773721	TE	scMethBank
GSM2773722	TE	scMethBank
GSM2773723	TE	scMethBank
GSM2773724	TE	scMethBank
GSM2773725	TE	scMethBank
GSM2773726	TE	scMethBank
GSM2773727	TE	scMethBank
GSM2773728	TE	scMethBank
GSM2773729	TE	scMethBank
GSM2773730	TE	scMethBank
GSM2773731	TE	scMethBank
GSM2773732	TE	scMethBank
GSM2773733	TE	scMethBank
GSM2773734	TE	scMethBank
GSM2773735	TE	scMethBank
GSM2773736	TE	scMethBank
GSM2773737	TE	scMethBank
GSM2773738	TE	scMethBank
GSM2773739	TE	scMethBank
GSM2773740	TE	scMethBank
GSM2773741	TE	scMethBank
GSM2773742	TE	scMethBank
GSM2773743	TE	scMethBank
GSM2773744	TE	scMethBank
GSM2773745	TE	scMethBank
GSM2773746	TE	scMethBank
GSM2773748	TE	scMethBank
GSM2773750	TE	scMethBank
GSM2773751	TE	scMethBank
GSM2773752	TE	scMethBank
GSM2833187	TE	scMethBank
GSM2833188	TE	scMethBank
GSM2833189	TE	scMethBank
GSM2833190	TE	scMethBank
GSM2833191	TE	scMethBank
GSM2833192	TE	scMethBank
GSM2833193	TE	scMethBank
GSM2833194	TE	scMethBank
GSM2833195	TE	scMethBank
GSM2833196	TE	scMethBank
GSM2833197	TE	scMethBank
GSM2833198	TE	scMethBank
GSM2833199	TE	scMethBank
GSM2833200	TE	scMethBank
GSM2833201	TE	scMethBank
GSM2833202	TE	scMethBank
GSM2833203	TE	scMethBank
GSM2833204	TE	scMethBank
GSM2833205	TE	scMethBank
GSM2833206	TE	scMethBank
GSM2833207	TE	scMethBank
GSM2833208	TE	scMethBank
GSM2833209	TE	scMethBank
GSM2833210	TE	scMethBank
GSM2833211	TE	scMethBank
GSM2833212	TE	scMethBank
GSM2833213	TE	scMethBank
GSM2833214	TE	scMethBank
GSM2833215	TE	scMethBank
GSM2833216	TE	scMethBank
GSM2833217	TE	scMethBank
GSM2833218	TE	scMethBank
GSM2833219	TE	scMethBank
GSM2833220	TE	scMethBank
GSM2833221	TE	scMethBank
GSM2833222	TE	scMethBank
GSM2833223	TE	scMethBank
GSM2833224	TE	scMethBank
GSM2833225	TE	scMethBank
GSM2833226	TE	scMethBank
GSM2833227	TE	scMethBank
GSM2833228	TE	scMethBank
GSM2833229	TE	scMethBank
GSM2833230	TE	scMethBank
GSM2833231	TE	scMethBank
GSM2833232	TE	scMethBank
GSM2833233	TE	scMethBank
GSM2833234	TE	scMethBank
GSM2986402	TE	scMethBank
GSM2986403	TE	scMethBank
GSM2986404	TE	scMethBank
GSM2986405	TE	scMethBank
GSM2986406	TE	scMethBank
GSM2481554	Zygote	scMethBank
GSM2481555	Zygote	scMethBank
GSM2481558	Zygote	scMethBank
GSM2481559	Zygote	scMethBank
GSM2481560	Zygote	scMethBank
GSM2481561	Zygote	scMethBank
GSM2481562	Zygote	scMethBank
GSM2481563	Zygote	scMethBank
GSM2481564	Zygote	scMethBank
GSM2481565	Zygote	scMethBank
GSM2481566	Zygote	scMethBank
GSM2481567	Zygote	scMethBank
GSM2481571	Zygote	scMethBank
GSM2481572	Zygote	scMethBank
GSM2481573	Zygote	scMethBank
GSM2481574	Zygote	scMethBank
GSM2481575	Zygote	scMethBank
GSM2481576	Zygote	scMethBank
GSM2481577	Zygote	scMethBank
GSM2481578	Zygote	scMethBank
GSM2833014	Zygote	scMethBank
GSM2833015	Zygote	scMethBank
GSM2833016	Zygote	scMethBank
GSM2833017	Zygote	scMethBank
GSM2833018	Zygote	scMethBank
GSM2833019	Zygote	scMethBank
GSM2833020	Zygote	scMethBank
GSM2833021	Zygote	scMethBank
GSM2833022	Zygote	scMethBank
GSM2833023	Zygote	scMethBank
GSM2986327	Zygote	scMethBank
GSM2986328	Zygote	scMethBank
GSM2986329	Zygote	scMethBank
GSM2986330	Zygote	scMethBank
GSM2986331	Zygote	scMethBank
GSM2986332	Zygote	scMethBank
GSM2986333	Zygote	scMethBank
GSM2986334	Zygote	scMethBank
GSM2986335	Zygote	scMethBank
GSM2986336	Zygote	scMethBank

## Sheet: Other datasets
ChIA-PET		RNA-seq (Tissue)			WGBS (T-cell, B-cell)			RNA-seq (T-cell, B-cell)			scRNA-seq
Sample name	data source	Sample name	tissue	data source	GSM	SRX	tissue	GSM	SRX	tissue	GSM	SRX	tissue
ENCFF507KYL	ENCODE	BSS00043	Adipose	Epimap	GSM4090910	SRX6890834	T-cell	GSM4042517	SRX6763340	T-cell	GSM1833279	SRX1120836	Oocyte
		BSS00045	Adrenal gland	Epimap	GSM4090911	SRX6890835	T-cell	GSM4042518	SRX6763341	T-cell	GSM1833280	SRX1120837	Oocyte
		BSS00096	B-cell	Epimap	GSM4090921	SRX6890845	T-cell	GSM4042519	SRX6763342	T-cell	GSM1833281	SRX1120838	Oocyte
		BSS00145	Breast	Epimap	GSM4090922	SRX6890846	T-cell	GSM4042520	SRX6763343	T-cell	GSM1833283	SRX1120840	Zygote
		BSS01542	Colon	Epimap	GSM4090923	SRX6890847	T-cell	GSM4042527	SRX6763350	T-cell	GSM1833284	SRX1120841	Zygote
		BSS00316	Esophagus	Epimap	GSM4090924	SRX6890848	T-cell	GSM4042528	SRX6763351	T-cell	GSM1833285	SRX1120842	Zygote
		BSS00079	Heart	Epimap	GSM4090925	SRX6890849	T-cell	GSM4042529	SRX6763352	T-cell	GSM1833292	SRX1120849	4 cell
		BSS01519	Liver	Epimap	GSM4090868	SRX6890792	B-cell	GSM4042530	SRX6763353	T-cell	GSM1833294	SRX1120850	4 cell
		BSS01190	Lung	Epimap	GSM4090869	SRX6890793	B-cell	GSM4042537	SRX6763360	B-cell	GSM1833295	SRX1120851	4 cell
		BSS01399	Ovary	Epimap	GSM4090870	SRX6890794	B-cell	GSM4042538	SRX6763361	B-cell	GSM1833297	SRX1120853	8 cell
		BSS00121	Pancreas	Epimap	GSM4090871	SRX6890795	B-cell	GSM4042539	SRX6763362	B-cell	GSM1833298	SRX1120854	8 cell
		BSS00211	Placenta	Epimap	GSM4090872	SRX6890796	B-cell	GSM4042540	SRX6763363	B-cell	GSM1833300	SRX1120855	8 cell
		BSS01628	Spleen	Epimap	GSM4090917	SRX6890841	B-cell				GSM1833307	SRX1120858	Morula
		BSS01637	Stomach	Epimap	GSM4090939	SRX6890863	B-cell				GSM1833309	SRX1120859	Morula
		BSS00189	T-cell	Epimap							GSM1833312	SRX1120860	Morula
		BSS01821	Thymus	Epimap							GSM1833329	SRX1120871	ICM
		BSS01831	Thyroid gland	Epimap							GSM1833330	SRX1120872	ICM
											GSM1833331	SRX1120873	ICM
											GSM1833334	SRX1120876	TE
											GSM1833332	SRX1120874	TE
											GSM1833333	SRX1120875	TE
