# Supplementary material for: A DNA methylation haplotype block landscape in human tissues and preimplantation embryos reveals regulatory elements defined by comethylation patterns
Source: HighWire-hosted journal article supplement (doi:10.1101/gr.278146.123), 2023-11-08
Supplement: Supplemental_Table_S2.xlsx [file Supplemental_Table_S2.xlsx]

## Sheet: table S2
Supplemental Table S2: Code and data availability
Group	Description	File name	Data availability
MHAPs	MHAP files generated in this study	-	https://jiantaoshi.github.io/normalmhaps/mHaps.html
Code	mHapSuite package	mHapSuite-2.0-jar-with-dependencies.jar	Supplemental Code
Code	Region-set enrichment analysis using LOLA	LOLA.html
Code	Enrichment analysis of tissue-specific genes in MHBs	rGREAT.html
Code	Genome segmentation by methylation patterns	Segment_discovery.html
Code	Enrichment of MHBs in open chromatin regions	In_house.html
MHB	Normal tissue (discovery set)	Adipose_MHB.bed	Supplemental Table S3
MHB	Normal tissue (discovery set)	Adrenal_MHB.bed
MHB	Normal tissue (discovery set)	B-cell_MHB.bed
MHB	Normal tissue (discovery set)	Breast_MHB.bed
MHB	Normal tissue (discovery set)	Colon_MHB.bed
MHB	Normal tissue (discovery set)	Esophagus_MHB.bed
MHB	Normal tissue (discovery set)	Heart_MHB.bed
MHB	Normal tissue (discovery set)	Liver_MHB.bed
MHB	Normal tissue (discovery set)	Lung_MHB.bed
MHB	Normal tissue (discovery set)	Ovary_MHB.bed
MHB	Normal tissue (discovery set)	Pancreas_MHB.bed
MHB	Normal tissue (discovery set)	Placenta_MHB.bed
MHB	Normal tissue (discovery set)	Spleen_MHB.bed
MHB	Normal tissue (discovery set)	Stomach_MHB.bed
MHB	Normal tissue (discovery set)	T-cell_MHB.bed
MHB	Normal tissue (discovery set)	Thymus_MHB.bed
MHB	Normal tissue (discovery set)	Thyroid_MHB.bed
MHB	Normal tissue (validation set)	Adipose_val_MHB.bed
MHB	Normal tissue (validation set)	Heart_val_MHB.bed
MHB	Normal tissue (validation set)	Liver_val_MHB.bed
MHB	Normal tissue (validation set)	Lung_val_MHB.bed
MHB	Early human embryos	Sperm_MHB.bed
MHB	Early human embryos	Oocyte_MHB.bed
MHB	Early human embryos	Zygote_MHB.bed
MHB	Early human embryos	2-cell_MHB.bed
MHB	Early human embryos	4-cell_MHB.bed
MHB	Early human embryos	8-cell_MHB.bed
MHB	Early human embryos	Morula_MHB.bed
MHB	Early human embryos	ICM_MHB.bed
MHB	Early human embryos	TE_MHB.bed
MHB	Early human embryos	Post-implantation_MHB.bed
Genome segmentation	UMR	Tissue_UMR.gz	https://doi.org/10.6084/m9.figshare.24062127
Genome segmentation	LMR	Tissue_LMR.gz
Genome segmentation	PMD	Tissue_PMD.gz
Genome segmentation	HMR	Tissue_HMR.gz
Open chromatin regions	Normal tissue	Adipose_ATAC.bed	https://doi.org/10.6084/m9.figshare.24062154
Open chromatin regions	Normal tissue	Adrenal_ATAC.bed
Open chromatin regions	Normal tissue	B-cell_ATAC.bed
Open chromatin regions	Normal tissue	Breast_ATAC.bed
Open chromatin regions	Normal tissue	Colon_ATAC.bed
Open chromatin regions	Normal tissue	Esophagus_ATAC.bed
Open chromatin regions	Normal tissue	Heart_ATAC.bed
Open chromatin regions	Normal tissue	Liver_ATAC.bed
Open chromatin regions	Normal tissue	Lung_ATAC.bed
Open chromatin regions	Normal tissue	Ovary_ATAC.bed
Open chromatin regions	Normal tissue	Pancreas_ATAC.bed
Open chromatin regions	Normal tissue	Placenta_ATAC.bed
Open chromatin regions	Normal tissue	Spleen_ATAC.bed
Open chromatin regions	Normal tissue	Stomach_ATAC.bed
Open chromatin regions	Normal tissue	T-cell_ATAC.bed
Open chromatin regions	Normal tissue	Thymus_ATAC.bed
Open chromatin regions	Normal tissue	Thyroid_ATAC.bed
Gene expression	Gene expression of normal tissues (bulk RNA-seq)	Tissue_Exp.tar.gz	https://doi.org/10.6084/m9.figshare.24062277
Gene expression	Gene expression of preimplantation embryos (scRNA-seq)	Stage_Exp.tar.gz	https://doi.org/10.6084/m9.figshare.24062277
Gene expression	Gene expression of T-cells (scRNA-seq)	T-cell_Exp.RData	https://doi.org/10.6084/m9.figshare.24062277
Motif	Motifs enriched in MHBs	-	Supplemental Table S4
Gene expression	Differentially expressed genes between B-cell and T-cell (bulk RNA-seq)	-	Supplemental Table S5
Gene expression	Tissue-specific genes	-	Supplemental Table S6
Gene expression	Genes with high methylation in promoters in human preimplantation embryos (scRNA-seq)	-	Supplemental Table S7
Gene expression	Stage-specific genes of human preimplantation embryos (scRNA-seq)	-	Supplemental Table S8
