# Supplementary material for: A DNA methylation haplotype block landscape in human tissues and preimplantation embryos reveals regulatory elements defined by comethylation patterns
Source: HighWire-hosted journal article supplement (doi:10.1101/gr.278146.123), 2023-11-08
Supplement: Supplemental_Table_S4.xlsx [file Supplemental_Table_S4.xlsx]

## Sheet: README
Supplemental Table S4: Motifs identified by HOMER in MHB regions.
Column names	Description
Motif consensus	Motif consensus
P-value	Enrichment P-value
% of Targets	Percentage of foreground regions with motifs
% of Background	Percentage of background regions with motifs
Best Match/Details	Motif annotation
Tissue	Tissue type

## Sheet: Motifs
Motif consensus	P-value	% of Targets	% of Background	STD(Bg STD)	Best Match/Details	Tissue
TTACTCGAGG	1e-06	0.0072	0.0003	11.6bp (91.1bp)	XBP1(MacIsaac)/Yeast(0.797)	Adipose
CCACCGGGAGGA	1e-05	0.0093	0.0011	13.8bp (207.1bp)	SRSF1(RRM)/Homo_sapiens-RNCMPT00107-PBM/HughesRNA(0.711)	Adipose
NYCAAGGHCA	1e-43	0.0896	0.0281	29.8bp (98.8bp)	Nr5a2(NR)/mES-Nr5a2-ChIP-Seq(GSE19019)/Homer(0.949)	Adrenal gland
RTGASTCABS	1e-18	0.0502	0.0189	30.0bp (62.2bp)	Atf3(bZIP)/GBM-ATF3-ChIP-Seq(GSE33912)/Homer(0.969)	Adrenal gland
CGAATGACGAAT	1e-07	0.0065	0.0009	35.0bp (126.6bp)	PB0108.1_Atf1_2/Jaspar(0.767)	Adrenal gland
CGAGACTCTC	1e-05	0.005	0.0006	12.4bp (86.7bp)	PB0203.1_Zfp691_2/Jaspar(0.684)	B-cell
AGGCAGCGCGTT	1e-07	0.0039	0.0001	36.0bp (59.0bp)	ZC3H10(Znf)/Homo_sapiens-RNCMPT00085-PBM/HughesRNA(0.706)	Breast
CCTTCCTCGAGT	1e-05	0.0034	0.0003	13.9bp (78.7bp)	XBP1(MacIsaac)/Yeast(0.705)	Breast
AGCCGAGGRCTC	1e-05	0.0043	0.0005	17.9bp (130.0bp)	Zfx/MA0146.2/Jaspar(0.711)	Breast
GTGCGTGGGCTC	0.0001	0.0212	0.011	18.5bp (132.5bp)	ZNF519(Zf)/HEK293-ZNF519.GFP-ChIP-Seq(GSE58341)/Homer(0.721)	Breast
GCAGACCCTCGC	1e-06	0.0286	0.0054	20.2bp (116.1bp)	HINFP/MA0131.2/Jaspar(0.670)	T-cell
GCAGGCTCTGCC	1e-06	0.0214	0.0033	17.0bp (82.7bp)	Sp5(Zf)/mES-Sp5.Flag-ChIP-Seq(GSE72989)/Homer(0.610)	T-cell
GTTTGTDCCTTC	1e-05	0.025	0.0052	27.6bp (79.3bp)	RBM5(Znf)/Homo_sapiens-RNCMPT00055-PBM/HughesRNA(0.747)	T-cell
TGCTCAGGVGAA	0.0001	0.0089	0.0005	46.4bp (71.2bp)	ZNF416(Zf)/HEK293-ZNF416.GFP-ChIP-Seq(GSE58341)/Homer(0.680)	T-cell
TTTGAGGT	0.001	0.0946	0.0562	24.8bp (121.5bp)	RUNX3/MA0684.1/Jaspar(0.759)	T-cell
GATTACAGGCGT	1e-08	0.0617	0.0444	32.5bp (47.9bp)	PB0180.1_Sp4_2/Jaspar(0.648)	Colon
TTTATGAC	0.0001	0.013	0.0079	44.0bp (107.0bp)	Cdx2(Homeobox)/mES-Cdx2-ChIP-Seq(GSE14586)/Homer(0.926)	Colon
TGGGATTA	0.001	0.0843	0.0713	31.2bp (57.6bp)	PITX3/MA0714.1/Jaspar(0.898)	Colon
KBGCAATGST	0.001	0.02	0.014	37.9bp (100.4bp)	RXR(NR),DR1/3T3L1-RXR-ChIP-Seq(GSE13511)/Homer(0.628)	Colon
RTGAGTSATC	1e-10	0.0105	0.0024	33.8bp (131.1bp)	NFE2/MA0841.1/Jaspar(0.802)	Esophagus
GCTCCTAACC	1e-08	0.0066	0.0012	33.2bp (96.7bp)	SRSF9(RRM)/Homo_sapiens-RNCMPT00074-PBM/HughesRNA(0.703)	Esophagus
AGCCTCGGGCTC	1e-07	0.0057	0.001	40.6bp (48.4bp)	TFAP2B(var.2)/MA0812.1/Jaspar(0.801)	Esophagus
CTMGTCTSCA	1e-06	0.0108	0.0038	36.4bp (83.1bp)	ARF1(ABI3/VP1)/Arabidopsis thaliana/AthaMap(0.697)	Esophagus
AAGGATTCCT	1e-05	0.0039	0.0007	22.5bp (64.5bp)	TEAD4(TEA)/Tropoblast-Tead4-ChIP-Seq(GSE37350)/Homer(0.701)	Esophagus
GCCACGCAGCCC	1e-05	0.0072	0.0022	27.2bp (97.9bp)	Ahr::Arnt/MA0006.1/Jaspar(0.651)	Heart
GTGATTCTGCCC	0.0001	0.0063	0.0019	32.6bp (76.2bp)	THAP1/MA0597.1/Jaspar(0.642)	Heart
CCGTCTGTCC	0.0001	0.0161	0.0084	18.4bp (85.5bp)	CNOT4(RRM)/Homo_sapiens-RNCMPT00156-PBM/HughesRNA(0.693)	Heart
CAGGAGACCAGA	0.001	0.0036	0.0008	26.5bp (70.2bp)	SRSF1(RRM)/Homo_sapiens-RNCMPT00110-PBM/HughesRNA(0.636)	Heart
GGTCAGAAGT	1e-18	0.0611	0.0317	53.7bp (99.3bp)	NR2C2/MA0504.1/Jaspar(0.780)	Liver
TATTGATY	1e-08	0.0515	0.033	37.8bp (95.1bp)	HNF6(Homeobox)/Liver-Hnf6-ChIP-Seq(ERP000394)/Homer(0.905)	Liver
AGTCCGAAGTCC	1e-07	0.006	0.0014	28.5bp (57.2bp)	HNF4G/MA0484.1/Jaspar(0.746)	Liver
TGGACYTT	1e-07	0.0241	0.013	40.0bp (95.1bp)	PB0134.1_Hnf4a_2/Jaspar(0.901)	Liver
MCTRTAACCYCA	1e-06	0.1147	0.0899	36.6bp (66.0bp)	HAP1(MacIsaac)/Yeast(0.695)	Liver
CAACCYYGGC	1e-06	0.1336	0.1075	45.5bp (81.7bp)	Gfi1b(Zf)/HPC7-Gfi1b-ChIP-Seq(GSE22178)/Homer(0.692)	Liver
GACGATCAGCDT	1e-06	0.0137	0.0004	19.2bp (26.4bp)	Dux/MA0611.1/Jaspar(0.653)	Lung
ACGGAGCCCMGG	0.0001	0.0355	0.0079	11.9bp (146.7bp)	POL013.1_MED-1/Jaspar(0.682)	Lung
GCGAGCGCTC	0.001	0.0219	0.0038	10.9bp (123.7bp)	PB0095.1_Zfp161_1/Jaspar(0.662)	Lung
GTCGCGAC	0.001	0.0273	0.0076	12.6bp (159.9bp)	ZBED1/MA0749.1/Jaspar(0.780)	Lung
CGAGCCCTGGTG	1e-07	0.0083	0.0005	25.1bp (119.9bp)	BORIS(Zf)/K562-CTCFL-ChIP-Seq(GSE32465)/Homer(0.612)	Ovary
GAGCTCCCRGAA	1e-05	0.0186	0.0049	22.2bp (106.0bp)	POL013.1_MED-1/Jaspar(0.630)	Ovary
GGTTGTTT	0.0001	0.0869	0.0531	38.5bp (92.1bp)	HuR(RRM)/Homo_sapiens-RNCMPT00112-PBM/HughesRNA(0.765)	Ovary
ACAYGGAGGSAT	0.001	0.0124	0.0034	22.7bp (58.3bp)	LIN28A(CSD)/Homo_sapiens-RNCMPT00162-PBM/HughesRNA(0.733)	Ovary
GTCCGAGACCTG	1e-05	0.0038	0.0003	9.1bp (46.9bp)	RTG3/Literature(Harbison)/Yeast(0.633)	Pancreas
TTCTCCCAACCC	0.001	0.0027	0.0002	23.2bp (59.9bp)	HNRNPK(KH)/Homo_sapiens-RNCMPT00026-PBM/HughesRNA(0.784)	Pancreas
GGGCGACAGA	1e-69	0.1236	0.0687	56.8bp (78.6bp)	CNOT4(RRM)/Homo_sapiens-RNCMPT00156-PBM/HughesRNA(0.713)	Placenta
TAGCTGGG	1e-50	0.1224	0.0751	46.4bp (82.8bp)	ACE2/MA0267.1/Jaspar(0.719)	Placenta
CACTGCAAKC	1e-48	0.1506	0.0987	47.2bp (68.0bp)	PB0091.1_Zbtb3_1/Jaspar(0.882)	Placenta
GCCTCAGCCT	1e-44	0.1717	0.1188	45.2bp (63.5bp)	TFAP2C(var.2)/MA0814.1/Jaspar(0.772)	Placenta
GCTGGMCTGTAC	1e-08	0.0076	0.0003	44.5bp (56.5bp)	SAMD4A(SAM)/Homo_sapiens-RNCMPT00063-PBM/HughesRNA(0.674)	Thyroid gland
TGGGYARCAGAG	1e-06	0.0704	0.0378	40.8bp (95.1bp)	Spz1/MA0111.1/Jaspar(0.641)	Thyroid gland
GAAGTGGAGG	1e-06	0.0891	0.0534	30.1bp (79.9bp)	ZNF354C/MA0130.1/Jaspar(0.718)	Thyroid gland
CACAGCTGYGGT	1e-05	0.0453	0.0099	10.2bp (110.1bp)	Tcf12(bHLH)/GM12878-Tcf12-ChIP-Seq(GSE32465)/Homer(0.795)	Thymus
CATCTTCA	0.001	0.0518	0.0183	15.0bp (105.7bp)	ZML2(C2C2gata)/col-ZML2-DAP-Seq(GSE60143)/Homer(0.759)	Thymus
AGGCACACGCAG	0.001	0.0129	0.0011	17.6bp (45.2bp)	Ahr::Arnt/MA0006.1/Jaspar(0.682)	Thymus
CAGCCGTCCC	0.0001	0.0136	0.0047	20.9bp (136.4bp)	Myod1/MA0499.1/Jaspar(0.717)	Stomach
CTTGTGTTCT	0.001	0.0296	0.0176	23.1bp (92.7bp)	HNRNPL(RRM)/Homo_sapiens-RNCMPT00091-PBM/HughesRNA(0.742)	Stomach
CTTCCTCTTT	1e-07	0.0135	0.0033	27.0bp (102.0bp)	SPIC/MA0687.1/Jaspar(0.869)	Spleen
AATTKCTTGA	0.001	0.0336	0.0198	23.0bp (64.3bp)	PH0009.1_Bsx/Jaspar(0.741)	Spleen
