# Supplementary material for: A DNA methylation haplotype block landscape in human tissues and preimplantation embryos reveals regulatory elements defined by comethylation patterns
Source: HighWire-hosted journal article supplement (doi:10.1101/gr.278146.123), 2023-11-08
Supplement: Supplemental_Table_S5.xlsx [file Supplemental_Table_S5.xlsx]

## Sheet: README
Supplemental Table S5: Differentially expressed gene with almost identical mean methylation in promoters in T and B cells.
Column names	Description
Gene	Gene symbol
B1 - B4	Gene expression in B cell samples (log2 TPM)
T1 - T8	Gene expression in T cell samples (log2 TPM)
log FC	Log2 Fold-change
P value	Rank sum test P values
Q value	Adjusted P values
DEG	Differential expression group
MHB (T cell)	Presence of MHBs in T cells
MHB (B cell)	Presence of MHBs in B cells

## Sheet: table S5
Gene	B1	B2	B3	B4	T1	T2	T3	T4	T5	T6	T7	T8	log FC	P value	Q value	DEG	MHB (T cell)	MHB (B cell)
A2M-AS1	2.091	1.002	1.071	0.3431	5.25	4.579	4.897	3.691	6.617	5.724	6.342	5.76	5.08737	0.0040404	0.035	Up	No	No
ADAM22	1.66	1.954	1.777	1.121	3.125	2.243	2.431	2.523	3.983	2.962	3.111	2.819	1.69427	0.0040404	0.035	Up	No	Yes
ADAMTS16	1.111	1.219	1.334	0.9183	2.428	1.864	2.149	1.521	1.729	1.612	1.45	1.704	1.07836	0.0040404	0.035	Up	No	No
ALCAM	4.127	4.744	4.857	4.103	2.656	2.558	2.902	2.497	2.259	2.304	2.43	2.605	-2.16639	0.0040404	0.035	Down	No	No
AMFR	6.551	5.728	6.274	5.452	5.185	4.553	4.575	4.12	4.867	4.516	3.645	3.826	-1.61918	0.0040404	0.035	Down	No	No
ANO10	1.583	1.492	1.897	1.662	3.266	3.466	3.408	1.928	2.821	2.897	3.086	1.963	1.63414	0.0040404	0.035	Up	No	No
ARHGAP11A	1.214	1.028	1.357	1.367	1.681	1.416	2.174	1.891	2.721	1.737	2.042	2.656	1.26549	0.0040404	0.035	Up	Yes	Yes
ARHGEF6	4.214	4.572	4.759	4.623	5.757	5.745	5.735	5.783	5.357	5.566	5.553	5.442	1.10264	0.0040404	0.035	Up	Yes	Yes
ARRB2	4.251	3.876	4.039	4.128	5.701	5.477	5.052	5.75	6.187	5.329	5.291	4.962	1.49555	0.0040404	0.035	Up	Yes	No
ATG4C	2.919	4.063	4.31	3.22	2.488	2.608	2.119	1.722	2.517	2.575	1.245	1.914	-1.76088	0.0040404	0.035	Down	No	No
BLCAP	5.367	5.543	5.774	5.828	4.465	4.419	4.444	4.477	4.87	4.227	4.108	4.349	-1.24321	0.0040404	0.035	Down	No	No
BTN2A2	4.202	4.599	4.533	4.94	3.015	2.607	2.829	2.364	3.917	2.878	3.137	2.711	-1.71788	0.0040404	0.035	Down	No	No
BTNL9	2.569	3.105	1.827	2.352	0.7186	1.095	1.077	0.5882	0.9762	0.6649	1.405	0.725	-2.40468	0.0040404	0.035	Down	No	Yes
C12orf57	3.275	3.555	3.043	3.522	4.733	4.779	4.681	5.366	3.841	4.165	4.092	4.497	1.31438	0.0040404	0.035	Up	No	Yes
CDC14A	4.475	3.654	3.458	3.875	7.067	6.403	6.427	6.166	5.97	5.724	5.424	6.407	2.43725	0.0040404	0.035	Up	No	Yes
CHCHD10	4.362	4.087	4.193	3.01	2.421	2.382	2.576	2.927	2.309	1.681	1.782	2.602	-1.82527	0.0040404	0.035	Down	No	No
CITED2	3.045	2.211	2.816	2.162	4.105	3.775	4.088	4.311	3.62	3.588	3.438	3.701	1.40321	0.0040404	0.035	Up	No	Yes
COBLL1	7.644	7.52	7.912	6.51	0.02059	0.6229	0.01849	0.6756	0.2736	0.4428	0.5348	0.4144	-9.14482	0.0040404	0.035	Down	No	No
COPRS	1.587	1.377	2.683	2.362	0.5996	0.8672	0.5218	0.8081	1.297	0.7528	1.123	0.3239	-2.11022	0.0040404	0.035	Down	No	No
CTSW	2.677	1.208	1.916	0.8218	4.87	4.32	4.828	4.223	8.076	5.86	7.642	6.54	5.11258	0.0040404	0.035	Up	No	No
CYP4V2	3.971	3.794	3.757	3.067	4.723	4.644	4.754	4.866	4.729	4.252	4.632	4.601	1.03294	0.0040404	0.035	Up	Yes	Yes
DDAH2	3.524	3.427	3.439	3.186	1.443	1.217	1.7	1.161	1.98	1.172	1.088	2.005	-2.3617	0.0040404	0.035	Down	No	No
DGKH	0.8055	0.8627	1.284	0.6367	3.922	3.228	4.128	2.68	4.838	4.223	3.646	2.514	3.89663	0.0040404	0.035	Up	No	Yes
DLG3	1.57	0.9995	1.654	0.8357	3.218	2.458	2.346	2.012	4.016	2.779	3.366	2.595	2.22876	0.0040404	0.035	Up	Yes	Yes
DOCK8-AS1	3.374	2.883	3.248	1.703	1.016	0.8864	1.163	0.2588	1.246	1.183	1.441	0.6142	-2.69327	0.0040404	0.035	Down	No	No
DSE	3.728	3.622	3.839	4.24	1.145	2.523	2.423	2.365	2.066	1.972	2.238	1.7	-2.04463	0.0040404	0.035	Down	No	Yes
DTX4	5.211	5.059	4.869	4.835	0.6906	1.356	1.011	1.19	1.931	0.8233	1.374	0.5127	-4.62357	0.0040404	0.035	Down	No	No
EIF2AK3	6.341	5.881	5.873	5.665	4.521	3.821	3.871	3.375	4.503	4.147	3.782	3.677	-2.01936	0.0040404	0.035	Down	No	No
EIF4EBP1	2.137	1.768	1.588	1.434	0.3566	0.5828	0.8022	0.2145	1.092	0.8758	0.7983	1.171	-1.75422	0.0040404	0.035	Down	No	No
ENOSF1	3.488	2.966	3.481	3.098	6.246	4.911	5.221	5.687	5.641	5.282	4.621	5.307	2.28913	0.0040404	0.035	Up	No	Yes
EPB41L2	5.304	5.697	5.284	5.523	3.566	3.302	3.411	3.035	2.675	3.192	2.732	2.269	-2.5335	0.0040404	0.035	Down	No	No
FAAHP1	0.3017	0.5867	0.3232	0.1624	3.287	2.417	2.602	0.8793	1.578	1.968	2.321	2.983	3.97796	0.0040404	0.035	Up	No	No
FMO5	2.956	3.452	3.429	3.349	2.178	1.927	2.015	1.285	2.706	2.305	1.731	2.303	-1.42693	0.0040404	0.035	Down	No	No
FNBP1L	2.617	2.234	3.019	2.49	1.565	0.9746	1.395	1.238	0.1631	0.7775	0.1506	0.64	-2.47159	0.0040404	0.035	Down	No	No
GALT	2.895	2.772	2.968	3.006	4.951	4.276	3.736	4.077	4.389	3.775	3.552	3.379	1.3069	0.0040404	0.035	Up	No	No
GAPDH	6.012	6.018	5.866	5.982	7.014	7.187	7.465	7.629	7.079	6.81	7.536	7.102	1.29555	0.0040404	0.035	Up	Yes	No
GEN1	4.912	4.704	5.264	3.841	2.665	1.843	3.02	1.783	3.271	1.996	2.626	1.891	-2.50351	0.0040404	0.035	Down	No	No
GLYATL1	4.375	4.359	4.112	4.233	1.013	1.411	2.036	0.651	1.693	1.883	1.115	1.667	-3.32798	0.0040404	0.035	Down	No	No
GOLGA7	3.069	4.485	4.207	4.746	5.555	5.851	5.695	5.799	5.916	5.377	5.848	5.467	1.50068	0.0040404	0.035	Up	No	Yes
GSTZ1	1.076	2.066	1.451	1.42	0.611	0.8486	0.9995	0.9946	0.9359	0.7054	0.8745	0.8884	-1.23477	0.0040404	0.035	Down	No	Yes
HCK	2.381	2.696	3.158	2.218	0.7371	1.026	0.9496	0.7	1.038	0.9406	1.305	0.4499	-2.58916	0.0040404	0.035	Down	No	No
HPSE	0.5402	0.8785	1.081	0.7313	1.804	1.696	1.657	1.936	2.378	1.427	1.925	1.368	1.70287	0.0040404	0.035	Up	No	No
IRS1	1.745	2.557	2.365	2.137	1.63	1.34	1.504	0.2081	0.3013	0.7815	0.1846	1.112	-1.91038	0.0040404	0.035	Down	No	No
KCNIP2	3.479	3.792	2.953	4.04	1.055	0.5651	0.6901	1.382	0.8614	1.348	0.2449	1.304	-3.53585	0.0040404	0.035	Down	No	Yes
KIAA0895L	0.7272	0.2547	0.5507	0.5695	1.692	0.8917	1.42	0.8308	1.789	1.835	1.077	1.454	1.89979	0.0040404	0.035	Up	No	Yes
KLHL5	4.791	4.488	4.524	4.262	3.592	3.279	3.243	3.01	2.713	2.546	2.586	2.037	-1.71526	0.0040404	0.035	Down	No	No
KYAT1	1.957	1.932	1.902	1.568	1.431	0.9676	1.221	0.9231	1.146	1.163	1.138	1.29	-1.05993	0.0040404	0.035	Down	No	No
LAMA5	2.872	2.475	2.478	1.917	0.7188	0.4097	0.5235	0.5454	0.5693	0.2864	0.4917	0.6407	-3.36448	0.0040404	0.035	Down	No	No
LGALS3	0.1399	1.048	1.323	0.1898	2.202	2.122	1.806	1.49	2.072	2.178	1.738	2.304	2.10915	0.0040404	0.035	Up	No	No
LIMK2	2.857	2.541	3.133	2.858	4.516	3.895	4.11	4.366	3.287	3.358	3.434	3.831	1.16741	0.0040404	0.035	Up	No	No
LINC01004	3.688	3.635	3.835	3.396	2.308	2.158	2.185	1.441	3.037	1.812	1.933	2.24	-1.67206	0.0040404	0.035	Down	No	No
MAP2	2.939	2.78	3.395	2.133	0.1858	0.2781	0.2936	0.03356	0	0.617	0.02207	0.1343	-5.35198	0.0040404	0.035	Down	No	No
MARF1	6.222	6.062	6.476	6.196	5.563	5.013	4.965	4.849	5.504	5.249	4.682	4.931	-1.14457	0.0040404	0.035	Down	No	No
MBNL1-AS1	3.971	4.163	4.112	3.823	5.513	6.028	5.799	4.465	4.665	5.91	5.86	5.002	1.54529	0.0040404	0.035	Up	No	No
MCTS1	4.835	4.38	4.549	4.437	2.832	2.866	3.022	2.373	2.937	2.939	2.989	2.967	-1.83204	0.0040404	0.035	Down	No	Yes
MLLT3	2.413	2.679	2.364	2.454	5.712	5.342	5.615	5.62	5.262	5.154	4.698	4.902	3.09175	0.0040404	0.035	Up	No	Yes
MOB3B	2.74	3.331	3.098	3.301	0.3884	0.654	0.373	0.1283	0.5597	0.2563	0.5349	0.4279	-4.51123	0.0040404	0.035	Down	No	No
NAA80	1.027	0.9601	1.24	0.9783	2.244	1.435	2.007	1.762	1.808	1.409	1.587	1.437	1.1171	0.0040404	0.035	Up	No	No
NEO1	1.188	1.687	1.884	0.4957	2.751	3.01	2.979	2.506	3.114	2.59	2.139	3.089	1.86101	0.0040404	0.035	Up	No	No
NFKBIE	1.808	1.997	1.988	2.479	0.4237	0.8764	1.21	1.1	1.27	0.6338	0.5859	0.5285	-1.99489	0.0040404	0.035	Down	No	No
NHSL2	0.9247	0.8338	0.9959	0.7941	2.901	2.504	3.019	1.811	2.252	2.886	3.105	2.872	2.71729	0.0040404	0.035	Up	No	Yes
NIPAL2	4.181	5.521	5.319	4.58	2.629	2.75	2.816	0.9504	3.484	2.892	2.767	1.893	-2.526	0.0040404	0.035	Down	No	No
NQO2	2.242	2.396	2.684	2.579	3.44	2.964	4.017	2.694	3.637	2.786	3.693	3.057	1.00641	0.0040404	0.035	Up	No	No
NREP	4.502	4.634	4.251	4.432	3.017	3.573	2.774	2.285	2.711	3.484	2.917	2.659	-1.60469	0.0040404	0.035	Down	No	No
NUBPL	5.041	4.781	4.731	4.766	4.063	3.713	3.535	3.602	4.423	4.122	3.564	3.22	-1.06168	0.0040404	0.035	Down	No	No
PARP8	6.197	6.65	6.8	6.425	7.794	7.837	7.907	7.266	8.627	8.361	8.363	8.253	1.57978	0.0040404	0.035	Up	Yes	No
PCNX2	4.096	3.798	4.752	2.67	5.561	5.453	5.285	5.071	5.742	5.584	4.93	5.049	1.41047	0.0040404	0.035	Up	No	No
PDE3B	2.486	2.417	1.604	1.242	5.941	5.938	5.851	5.318	5.172	6.497	5.059	5.632	4.09372	0.0040404	0.035	Up	Yes	No
PIGF	4.813	5.21	5.457	5.037	3.919	3.272	3.733	3.469	4.532	4.31	3.972	3.852	-1.27112	0.0040404	0.035	Down	No	No
PLCD1	0.7815	1.732	1.833	0.7378	2.723	2.432	2.702	2.016	2.672	2.052	2.295	1.951	1.4321	0.0040404	0.035	Up	No	No
PTPN7	2.174	2.239	2.671	2.583	3.926	3.469	3.667	3.376	4.614	3.372	3.925	3.181	1.51343	0.0040404	0.035	Up	No	No
RBL2	5.527	5.959	5.863	5.6	7.546	7.402	7.377	6.779	7.249	7.635	7.394	6.995	1.59017	0.0040404	0.035	Up	Yes	No
RFLNB	0.9915	0.3709	0.7365	0.2442	3.504	3.072	3.126	3.349	2.33	3.112	2.687	3.045	3.79146	0.0040404	0.035	Up	No	No
RFX5	4.467	4.899	4.484	4.712	3.457	3.16	2.94	2.687	3.638	3.432	3.691	3.427	-1.40427	0.0040404	0.035	Down	No	No
RGL4	0.9243	1.675	2.073	2.378	2.92	3.594	3.471	4.068	3.272	3.723	2.736	2.996	1.8751	0.0040404	0.035	Up	No	No
S1PR5	0.7234	0.6041	0.7515	0.3135	0.8792	1.578	2.483	0.8957	6.699	3.178	5.14	4.098	5.33749	0.0040404	0.035	Up	Yes	No
SIGLEC14	2.789	2.716	3.956	2.519	0.3049	0.5966	0.4891	0.182	0.5197	0.3707	1.164	0.08562	-4.21313	0.0040404	0.035	Down	No	No
SLC26A11	1.225	0.7447	0.6301	0.9192	2.511	2.602	2.497	2.048	2.433	2.15	1.372	2.293	2.16117	0.0040404	0.035	Up	No	No
SLC38A11	5.169	6.346	5.731	6.527	0.5627	1.039	0.7415	0.8735	1.033	0.631	0.6249	0.667	-6.48866	0.0040404	0.035	Down	No	No
SLC39A8	1.403	1.769	1.907	1.469	3.182	3.727	3.229	2.932	3.293	3.503	3.371	3.096	2.05754	0.0040404	0.035	Up	No	No
SNX2	8.089	8.051	8.506	8.557	5.406	5.273	5.424	5.695	5.631	5.191	5.093	4.992	-2.99356	0.0040404	0.035	Down	No	No
SPN	0.9977	1.193	1.514	0.9106	3.964	3.985	3.813	3.515	5.102	3.792	4.562	3.972	3.76471	0.0040404	0.035	Up	No	Yes
SUV39H1	0.6619	0.8055	0.8465	1.206	1.826	1.754	1.278	1.86	1.633	1.581	1.517	1.288	1.25273	0.0040404	0.035	Up	Yes	Yes
SYTL2	1.325	1.991	0.6332	0.4629	5.79	5.991	5.614	5.466	7.025	6.417	6.689	6.647	5.84797	0.0040404	0.035	Up	No	No
TCOF1	4.2	3.739	3.98	3.736	2.758	2.33	2.457	2.211	3.054	2.278	2.219	2.323	-1.62991	0.0040404	0.035	Down	No	No
TDRKH	1.216	1.692	1.264	1.287	3.264	3.019	2.75	2.061	2.336	2.446	2.332	2.56	1.71664	0.0040404	0.035	Up	No	No
TENM1	0.2581	0.08027	0.02269	0.02214	3.117	2.443	2.635	2.491	4.589	3.178	3.843	3.075	7.0202	0.0040404	0.035	Up	No	No
TESK1	4.808	3.61	3.687	4.187	3.039	3.005	3.313	2.424	3.473	2.905	2.607	2.747	-1.2928	0.0040404	0.035	Down	No	Yes
TFEC	4.145	4.67	5.418	3.907	0.1125	0.7747	0.1716	0.1498	0.3653	1.787	1.667	0.5708	-4.9142	0.0040404	0.035	Down	No	No
THEM5	0.0967	0.08596	0.1837	0	1.925	2.274	2.127	1.989	0.7818	2.353	0.8872	1.852	5.31776	0.0040404	0.035	Up	No	No
TIFA	3.367	4.154	4.096	3.733	2.681	2.782	3.27	2.354	3.185	2.769	3.296	2.279	-1.10655	0.0040404	0.035	Down	No	No
TIMP1	1.547	1.135	1.523	1.037	4.267	3.97	4.751	5.112	2.488	3.489	3.503	4.73	3.56583	0.0040404	0.035	Up	No	No
TMEM106A	4.162	4.443	4.525	4.31	3.034	1.787	2.433	2.574	3.919	2.774	2.877	2.721	-1.62515	0.0040404	0.035	Down	No	No
TMEM50A	3.858	4.534	4.429	4.439	5.311	5.091	5.241	5.028	6.045	4.887	5.687	5.341	1.07449	0.0040404	0.035	Up	No	No
TPM2	0.4473	0.283	0.3102	0.3782	3.046	3.882	2.722	2.639	3.154	3.043	2.267	1.284	4.54331	0.0040404	0.035	Up	No	No
TRIM34	3.772	4.116	4.161	4.223	3.277	3.118	3.127	3.491	3.083	2.952	2.946	2.805	-1.05324	0.0040404	0.035	Down	No	No
TSPAN2	0	0.02776	0.06046	0.1153	0.6619	0.9491	2.521	0.2169	2.569	1.495	2.193	1.471	5.99204	0.0040404	0.035	Up	No	No
UPP2	1.959	1.853	2.152	1.462	1.106	0.4904	0.8448	0.2061	0.8374	0.8777	0.8282	0.6963	-1.95302	0.0040404	0.035	Down	No	No
USP40	4.971	4.671	5.284	4.988	4.027	4.196	3.866	3.6	4.21	4.119	4.078	3.893	-1.03033	0.0040404	0.035	Down	No	No
WHAMMP2	1.416	1.676	1.505	1.602	2.645	2.584	2.688	2.414	2.652	2.935	2.37	2.509	1.39927	0.0040404	0.035	Up	No	No
WIPI1	2.928	2.616	3.044	2.659	4	3.422	3.372	3.175	4.828	3.975	4.312	3.843	1.26034	0.0040404	0.035	Up	No	No
WSB2	1.983	2.315	2.347	2.071	2.792	3.093	3.223	2.644	3.786	3.294	3.51	3.035	1.21988	0.0040404	0.035	Up	No	No
ZCCHC18	3.24	3.635	3.922	3.7	2.196	1.719	0.7032	1.809	2.723	1.728	1.117	1.885	-2.14697	0.0040404	0.035	Down	No	No
ZEB1-AS1	3.337	2.53	2.915	2.317	1.928	1.31	1.723	1.945	1.821	2.015	1.618	2.179	-1.24394	0.0040404	0.035	Down	No	No
ZNF204P	1.474	0.952	1.339	0.8085	2.394	1.895	2.275	2.308	1.629	2.363	1.603	2.197	1.41477	0.0040404	0.035	Up	No	No
ZNF415	2.771	2.582	2.46	2.22	1.968	1.818	1.945	1.63	1.718	0.5012	0.9934	1.938	-1.16607	0.0040404	0.035	Down	No	No
ZNF439	3.339	3.915	4.204	3.627	3.224	3.042	2.188	2.268	2.981	2.568	1.632	1.691	-1.41078	0.0040404	0.035	Down	No	Yes
ZNF502	3.212	1.739	2.191	1.572	1.167	1.426	1.412	0.6314	0.128	1.51	0.6644	1.2	-1.84848	0.0040404	0.035	Down	No	No
ZNF763	3.182	2.615	2.391	2.996	1.662	2.374	1.631	2.15	1.859	1.839	1.844	2.22	-1.06567	0.0040404	0.035	Down	No	Yes
ZNF792	1.426	1.599	1.939	1.538	2.737	2.538	2.788	2.589	2.781	2.601	2.321	2.497	1.27712	0.0040404	0.035	Up	No	No
