# Supplementary material for: A DNA methylation haplotype block landscape in human tissues and preimplantation embryos reveals regulatory elements defined by comethylation patterns
Source: HighWire-hosted journal article supplement (doi:10.1101/gr.278146.123), 2023-11-08
Supplement: Supplemental_Table_S6.xlsx [file Supplemental_Table_S6.xlsx]

## Sheet: Tissue specific genes
Supplemental Table S6: Tissue-specific genes
Gene	Adipose	Adrenal Gland	Breast	Colon	Esophagus	Heart	Liver	Lung	Ovary	Pancreas	Placenta	Spleen	Stomach	Thyroid Gland
ABCD2	Yes	No	No	No	No	No	No	No	No	No	No	No	No	No
ABLIM3	Yes	No	No	No	No	No	No	No	No	No	No	No	No	No
ACACB	Yes	No	No	No	No	No	No	No	No	No	No	No	No	No
ACVR1C	Yes	No	No	No	No	No	No	No	No	No	No	No	No	No
ADAMTS15	Yes	No	No	No	No	No	No	No	No	No	Yes	No	No	No
ADAMTS4	Yes	No	No	No	No	No	No	No	No	No	No	No	No	No
ADH1B	Yes	No	No	No	No	No	Yes	No	No	No	No	No	No	No
ADIPOQ	Yes	No	No	No	No	No	No	No	No	No	No	No	No	No
ADIRF	Yes	No	No	No	No	No	No	No	No	No	No	No	No	No
ADRA1A	Yes	No	No	No	No	No	Yes	No	No	No	No	No	No	No
AIFM2	Yes	No	No	No	No	No	No	No	No	No	No	No	No	No
AKR1C2	Yes	No	Yes	No	Yes	No	Yes	No	No	No	No	No	Yes	No
ANGPTL4	Yes	No	No	No	No	No	No	No	No	No	No	No	No	No
AOC2	Yes	No	No	No	No	No	No	No	No	No	No	No	No	No
AOC3	Yes	No	No	No	No	No	No	No	No	No	No	No	No	No
APOLD1	Yes	No	No	No	No	No	No	No	No	No	No	No	No	No
AQP7	Yes	No	No	No	No	No	No	No	No	No	No	No	No	No
ARC	Yes	Yes	No	No	No	No	No	No	No	No	No	No	No	No
ARHGEF15	Yes	No	No	No	No	No	No	No	No	No	No	No	No	No
ATOH8	Yes	No	No	No	No	No	No	No	No	No	No	No	No	No
AVPR2	Yes	No	No	No	No	No	No	No	No	No	No	No	No	No
BOK	Yes	No	No	No	No	No	No	No	No	No	No	No	No	No
BTNL9	Yes	No	No	No	No	No	No	No	No	No	No	No	No	No
C11ORF91	Yes	No	No	No	No	No	No	No	No	No	No	No	No	No
C14ORF180	Yes	No	No	No	No	Yes	No	No	No	No	No	No	No	No
C1QTNF1	Yes	No	No	No	No	No	No	No	No	No	No	No	No	No
C2CD4B	Yes	No	No	No	No	No	No	No	No	No	No	No	No	No
C2CD4C	Yes	No	No	No	No	No	No	No	No	No	No	No	No	No
C2ORF66	Yes	Yes	No	No	No	No	No	No	No	No	No	No	No	No
CALB2	Yes	No	No	No	No	No	No	No	No	No	No	No	No	No
CCL18	Yes	No	No	No	No	No	No	Yes	No	No	No	No	No	No
CCL19	Yes	No	No	No	No	No	No	No	No	No	No	No	No	No
CD209	Yes	No	No	No	No	No	No	No	No	No	No	No	No	No
CD248	Yes	No	No	No	No	No	No	No	No	No	No	No	No	No
CD300LG	Yes	No	No	No	No	No	No	No	No	No	Yes	No	No	No
CDO1	Yes	No	No	No	No	No	Yes	No	No	No	No	No	No	No
CETP	Yes	No	No	No	No	No	Yes	No	No	No	Yes	Yes	No	No
CFD	Yes	No	No	No	No	No	No	No	No	No	No	No	No	No
CIDEA	Yes	No	No	No	No	No	No	No	No	No	No	No	No	No
CIDEC	Yes	No	No	No	No	No	No	No	No	No	No	No	No	No
CLDN5	Yes	No	No	No	No	No	No	No	No	No	No	No	No	No
CLEC4G	Yes	No	No	No	No	No	Yes	No	No	No	No	No	No	No
CNTFR	Yes	No	No	No	No	No	No	No	No	No	No	No	No	No
CPM	Yes	No	No	No	No	No	No	No	No	No	No	No	No	No
CXCL3	Yes	No	No	No	No	No	No	No	No	No	No	No	No	No
DEFB132	Yes	No	No	No	No	No	No	No	No	No	No	No	No	No
DGAT2	Yes	No	No	No	No	No	Yes	No	No	No	No	No	No	No
EBF1	Yes	No	No	No	No	No	No	No	No	No	No	No	No	No
EBF2	Yes	No	No	No	No	No	No	No	No	No	No	No	No	No
EBF3	Yes	No	No	No	No	No	No	No	No	No	No	No	No	No
EHD2	Yes	No	No	No	No	No	No	No	No	No	No	No	No	No
ELOVL3	Yes	No	Yes	No	No	No	No	No	No	No	No	No	No	No
EN1	Yes	No	Yes	No	No	No	No	No	No	No	No	No	No	No
FABP4	Yes	No	No	No	No	No	No	No	No	No	No	No	No	No
FFAR3	Yes	No	No	No	No	No	No	No	No	No	No	No	No	No
FGFBP2	Yes	No	Yes	No	No	No	No	Yes	No	No	No	Yes	No	No
FMO2	Yes	No	No	No	Yes	No	No	Yes	No	No	No	No	No	No
FOSL1	Yes	No	No	No	No	No	No	No	No	No	No	No	No	No
FZD4	Yes	No	No	No	No	No	No	No	No	No	No	No	No	No
G0S2	Yes	No	No	No	No	No	No	No	No	No	No	No	No	No
GABRE	Yes	No	No	No	No	No	No	No	No	No	No	No	No	No
GALNT15	Yes	No	No	No	No	No	No	No	No	No	Yes	No	No	No
GFPT2	Yes	No	No	No	No	No	No	No	No	No	No	No	No	No
GHR	Yes	No	No	No	No	No	Yes	No	No	No	No	No	No	No
GPD1	Yes	No	No	No	No	No	No	No	No	No	No	No	No	No
GPIHBP1	Yes	No	No	No	No	No	No	Yes	No	No	No	No	No	No
GSC	Yes	No	Yes	No	No	No	No	No	No	No	No	No	No	No
GYG2	Yes	No	No	No	No	No	No	No	No	No	No	No	No	No
HAS1	Yes	No	No	No	No	No	No	No	No	No	No	No	No	No
HAS2	Yes	No	No	No	No	No	No	No	No	No	No	No	No	No
HRCT1	Yes	No	No	No	No	No	No	No	No	No	No	No	No	No
IGFBP6	Yes	No	No	No	No	No	No	No	No	No	No	No	No	No
IL2RA	Yes	No	No	No	No	No	No	No	No	No	No	No	No	No
IL6	Yes	No	No	No	No	No	No	No	No	No	No	No	No	No
INHBB	Yes	No	No	No	No	No	No	No	No	No	No	No	No	No
IRX6	Yes	No	No	No	No	Yes	No	No	No	No	No	No	No	No
ITGA7	Yes	No	No	No	No	No	No	No	No	No	No	No	No	No
KANK4	Yes	No	No	No	No	No	No	No	No	No	Yes	No	No	No
KCNIP2	Yes	No	No	No	No	Yes	No	No	No	No	No	No	No	No
KIF25	Yes	No	No	No	No	No	No	No	No	No	No	No	No	No
KLB	Yes	No	No	No	No	No	Yes	No	No	No	No	No	No	No
LBP	Yes	No	No	No	No	No	Yes	No	No	No	No	No	No	No
LEP	Yes	No	No	No	No	No	No	No	No	No	No	No	No	No
LGALS12	Yes	No	No	No	No	No	No	No	No	No	No	No	No	No
LHCGR	Yes	Yes	No	No	No	No	No	No	Yes	No	No	No	No	Yes
LILRA6	Yes	No	No	No	No	No	No	No	No	No	No	Yes	No	No
LILRB3	Yes	No	No	No	No	No	No	Yes	No	No	No	Yes	No	No
LIPE	Yes	No	No	No	No	No	No	No	No	No	No	No	No	No
LPL	Yes	No	No	No	No	Yes	No	No	No	No	No	No	No	No
MCAM	Yes	No	No	No	No	No	No	No	No	No	No	No	No	No
MDFI	Yes	No	No	No	No	No	No	No	No	No	No	No	No	No
MEDAG	Yes	No	No	No	No	No	No	No	No	No	No	No	No	No
MEOX1	Yes	No	No	No	No	No	No	No	No	No	No	No	No	No
MESP1	Yes	No	No	No	No	No	No	No	No	No	No	No	No	No
MLXIPL	Yes	No	No	No	No	No	Yes	No	No	No	No	No	No	No
MMD	Yes	No	No	No	No	No	No	No	No	No	No	No	No	No
MMP19	Yes	No	No	No	No	No	No	No	No	No	No	No	No	No
MRAP	Yes	Yes	No	No	No	No	No	No	No	No	No	No	No	No
MT1A	Yes	No	No	No	No	No	No	No	No	No	No	No	No	No
MT1M	Yes	No	No	No	No	No	No	No	No	No	No	No	No	No
MXRA8	Yes	No	No	No	No	No	No	No	No	No	No	No	No	No
MYOC	Yes	No	No	No	No	No	No	No	No	No	No	No	No	No
NoT8L	Yes	No	No	No	No	No	No	No	No	No	No	No	No	No
NMB	Yes	No	No	No	No	No	No	No	No	No	No	No	No	No
NPR1	Yes	No	No	No	No	No	No	No	No	No	No	No	No	No
NXNL1	Yes	No	No	No	No	No	No	No	No	No	No	No	No	No
OR51E1	Yes	No	No	No	No	No	No	No	No	No	Yes	No	No	No
PALM2-AKAP2	Yes	No	No	No	No	No	No	No	No	No	No	No	No	No
PALMD	Yes	No	No	No	No	No	No	No	No	No	No	No	No	No
PCOLCE2	Yes	No	No	No	No	No	No	No	No	No	Yes	No	No	No
PDE3B	Yes	No	No	No	No	No	No	No	No	No	No	No	No	No
PFKFB1	Yes	No	No	No	No	No	Yes	No	No	No	No	No	No	No
PITX3	Yes	No	No	No	No	No	No	No	No	No	No	No	No	No
PLAC9	Yes	No	No	No	No	No	No	No	No	No	No	No	No	No
PLIN1	Yes	No	No	No	No	No	No	No	No	No	No	No	No	No
PLIN4	Yes	No	No	No	No	No	No	No	No	No	No	No	No	No
PLIN5	Yes	No	No	No	No	No	No	No	Yes	No	No	No	No	No
PLXNo4	Yes	No	No	No	No	No	No	No	No	No	No	No	No	No
PNPLA2	Yes	No	No	No	No	No	No	No	No	No	No	No	No	No
POLN	Yes	No	No	No	No	No	No	No	No	No	No	No	No	No
PPARG	Yes	No	No	No	No	No	No	No	No	No	No	No	No	No
PPP1R1A	Yes	No	No	No	No	No	No	No	No	No	No	No	No	No
PRKAR2B	Yes	No	No	No	No	No	No	No	No	No	No	No	No	No
PROKR1	Yes	Yes	No	No	No	No	No	No	No	No	No	No	No	No
PRRT4	Yes	No	No	No	No	No	No	No	No	No	No	No	No	No
PTGER3	Yes	No	No	No	No	No	No	No	No	No	No	No	No	No
PTX3	Yes	No	No	No	No	No	No	No	No	No	No	No	No	No
RASL10B	Yes	No	No	No	No	No	No	No	No	No	No	No	No	No
RBP7	Yes	No	No	No	No	No	No	No	No	No	No	No	No	No
RDH5	Yes	No	No	No	No	No	No	No	No	No	No	No	No	No
S100B	Yes	No	No	No	No	No	No	No	No	No	No	No	No	No
SAA1	Yes	No	No	No	No	No	Yes	No	No	No	No	No	No	No
SAA2	Yes	No	No	No	No	No	Yes	No	No	No	No	No	No	No
SCN4A	Yes	No	No	No	No	No	No	No	No	No	No	No	No	No
SCN4B	Yes	No	No	No	No	No	No	No	No	No	No	No	No	No
SEMA3G	Yes	No	No	No	No	No	No	No	No	No	No	No	No	No
SHOX2	Yes	No	No	No	No	No	No	No	No	No	No	No	No	No
SLC19A3	Yes	No	No	No	No	No	No	No	No	No	Yes	No	No	No
SLC29A4	Yes	No	No	No	No	No	No	No	No	No	No	No	No	No
SLC7A10	Yes	No	No	No	No	No	No	No	No	No	No	No	No	No
SOD3	Yes	No	No	No	No	No	No	No	No	No	No	No	No	No
SOX18	Yes	No	No	No	No	No	No	No	No	No	No	No	No	No
SRPX	Yes	No	No	No	No	No	No	No	No	No	No	No	No	No
TBX15	Yes	No	Yes	No	No	No	Yes	No	No	No	No	No	No	No
TCF15	Yes	No	No	No	No	Yes	No	No	No	No	Yes	No	No	No
THBS4	Yes	No	No	No	No	Yes	No	No	No	No	No	No	No	No
THRSP	Yes	No	No	No	No	No	Yes	No	No	No	No	No	No	No
THSD7B	Yes	No	No	No	No	No	No	No	No	No	No	No	No	No
TIMP4	Yes	No	No	No	No	No	No	No	No	No	No	No	No	No
TMEM132C	Yes	No	No	No	No	No	No	No	No	No	No	No	No	No
TNFRSF4	Yes	No	No	No	No	No	No	No	No	No	No	No	No	No
TNMD	Yes	No	No	No	No	No	No	No	No	No	No	No	No	No
TNN	Yes	No	No	No	No	No	No	No	No	No	No	No	No	No
TUSC5	Yes	No	No	No	No	No	No	No	No	No	No	No	No	No
TWIST1	Yes	No	No	No	No	No	No	No	No	No	No	No	No	No
VWF	Yes	No	No	No	No	No	No	No	No	No	No	No	No	No
WNT11	Yes	Yes	No	No	No	No	No	No	No	No	No	No	No	No
AADAC	No	Yes	No	No	No	No	Yes	No	No	No	No	No	No	No
ABCB1	No	Yes	No	No	No	No	No	No	No	No	No	No	No	No
ADAMTSL2	No	Yes	No	No	No	No	No	No	No	No	No	No	No	No
AGRP	No	Yes	No	No	No	No	No	Yes	No	No	No	No	No	No
AKR1B1	No	Yes	No	No	No	No	No	No	No	No	No	No	No	No
AMHR2	No	Yes	No	No	No	No	No	No	Yes	No	No	No	No	No
ANO4	No	Yes	No	No	No	No	No	No	Yes	No	No	No	No	No
AOX1	No	Yes	No	No	No	No	Yes	No	No	No	No	No	No	No
ARHGAP36	No	Yes	No	No	No	No	No	No	No	No	No	No	No	No
ARSF	No	Yes	No	No	Yes	No	No	No	No	No	No	No	No	No
AS3MT	No	Yes	No	No	No	No	No	No	No	No	No	No	No	No
ASB4	No	Yes	No	No	No	No	No	No	No	No	No	No	No	No
ASTN1	No	Yes	No	No	No	No	No	No	No	No	No	No	No	No
ATP2B3	No	Yes	No	No	No	No	No	No	No	No	No	No	No	No
AVPR1A	No	Yes	No	No	No	No	No	No	No	No	No	No	No	No
BAIAP3	No	Yes	No	No	No	No	No	No	No	No	No	No	No	No
BRINP2	No	Yes	No	No	No	No	No	No	No	No	No	No	No	No
C2CD2	No	Yes	No	No	No	No	No	No	No	No	No	No	No	No
C4B	No	Yes	No	No	No	No	Yes	No	No	No	No	No	No	No
C7	No	Yes	No	No	No	No	No	No	No	No	No	No	No	No
C9ORF47	No	Yes	No	No	No	No	No	No	No	No	No	No	No	No
CABP7	No	Yes	No	No	No	No	No	No	No	No	No	No	No	No
CACNo1B	No	Yes	No	No	No	No	No	No	No	No	No	No	No	No
CADPS	No	Yes	No	No	No	No	No	No	No	No	No	No	No	No
CALN1	No	Yes	No	No	No	No	No	No	No	No	No	No	No	No
CALY	No	Yes	No	No	No	No	No	No	No	No	No	No	No	No
CAMK2N2	No	Yes	No	No	No	No	No	No	No	No	No	No	No	No
CARTPT	No	Yes	No	No	No	No	No	No	No	No	No	No	No	No
CBLN4	No	Yes	No	No	No	No	No	No	No	No	No	No	No	No
CBWD6	No	Yes	No	No	No	No	No	No	No	No	No	No	No	No
CDH18	No	Yes	No	No	No	No	No	No	No	No	No	No	No	No
CDH2	No	Yes	No	No	No	Yes	No	No	No	No	No	No	No	No
CELA1	No	Yes	No	No	No	No	No	No	No	Yes	No	No	No	No
CELF3	No	Yes	No	No	No	No	No	No	No	No	No	No	No	No
CELSR3	No	Yes	No	No	No	No	No	No	No	No	No	No	No	No
CHGA	No	Yes	No	No	No	No	No	No	No	No	No	No	No	No
CHGB	No	Yes	No	No	No	No	No	No	No	No	No	No	No	No
CHRNo3	No	Yes	No	No	No	No	No	No	No	No	No	No	No	No
CHRNo7	No	Yes	No	No	No	No	No	No	No	No	No	No	No	No
CHRNB4	No	Yes	No	No	No	No	No	No	No	No	No	No	No	No
CLRN1	No	Yes	No	No	No	No	No	No	No	No	No	No	No	No
CNGB1	No	Yes	No	No	No	No	No	No	No	No	No	No	No	No
COL22A1	No	Yes	No	No	No	No	No	No	No	No	No	No	No	No
CRYBA2	No	Yes	No	No	No	No	No	No	No	No	No	No	Yes	No
CSDC2	No	Yes	No	No	No	No	No	No	Yes	No	No	No	No	No
CYP11A1	No	Yes	No	No	No	No	No	No	No	No	No	No	No	No
CYP11B1	No	Yes	No	No	No	No	No	No	No	No	No	No	No	No
CYP11B2	No	Yes	No	No	No	No	No	No	No	No	No	No	No	No
CYP17A1	No	Yes	No	No	No	No	No	No	No	No	No	No	No	No
CYP21A2	No	Yes	No	No	No	No	No	No	No	No	No	No	No	No
CYP2W1	No	Yes	No	No	No	No	No	No	No	No	No	No	No	No
DBH	No	Yes	No	No	No	No	No	No	No	No	No	No	No	No
DLK1	No	Yes	No	No	No	No	No	No	No	No	Yes	No	No	No
DLX1	No	Yes	No	No	No	No	No	No	No	No	No	No	No	No
DNoJC12	No	Yes	No	No	No	No	No	No	No	No	No	No	No	No
DNER	No	Yes	No	No	No	No	No	No	No	No	No	No	No	No
DPP10	No	Yes	No	No	No	No	No	No	No	No	No	No	No	No
DRD2	No	Yes	No	No	No	No	No	No	No	No	No	No	No	No
DRGX	No	Yes	No	No	No	No	No	No	No	No	No	No	No	No
ELAVL4	No	Yes	No	No	No	No	No	No	No	No	No	No	No	No
EPHA8	No	Yes	No	No	No	No	No	No	No	No	No	Yes	No	No
EVX1	No	Yes	No	No	No	No	No	No	No	No	No	No	No	No
FAM131C	No	Yes	No	No	No	No	No	No	No	No	No	No	No	No
FAM135B	No	Yes	No	No	No	No	No	No	No	No	No	No	No	No
FAM163A	No	Yes	No	No	No	No	No	No	No	No	No	No	No	No
FAM19A3	No	Yes	No	No	No	No	No	No	No	No	No	No	No	No
FAM19A4	No	Yes	No	No	No	No	No	No	No	No	No	No	No	No
FDX1	No	Yes	No	No	No	No	No	No	No	No	No	No	No	No
FDXR	No	Yes	No	No	No	No	No	No	No	No	No	No	No	No
FEV	No	Yes	No	No	No	No	No	No	No	No	No	No	Yes	No
FGF11	No	Yes	No	No	No	No	No	No	No	No	No	No	No	No
FGF12	No	Yes	No	No	No	Yes	No	No	No	No	No	No	No	No
FGF17	No	Yes	No	No	No	No	No	No	No	No	No	No	No	No
FIBCD1	No	Yes	No	No	No	No	No	No	No	No	No	No	No	No
FLRT1	No	Yes	No	No	No	No	No	No	No	No	No	No	No	No
FNDC4	No	Yes	No	No	No	No	No	No	No	No	No	No	No	No
FNDC9	No	Yes	No	No	No	No	No	No	No	No	No	No	No	No
FSTL5	No	Yes	No	No	No	No	No	No	No	No	No	No	No	No
GALNT13	No	Yes	No	No	No	No	No	No	No	No	No	No	No	No
GALR1	No	Yes	No	No	No	No	No	No	No	No	No	No	No	No
GCGR	No	Yes	No	No	No	No	Yes	No	No	No	No	No	No	No
GHRH	No	Yes	No	No	No	No	No	No	No	No	No	No	No	No
GJD2	No	Yes	No	No	No	No	No	No	No	No	No	No	No	No
GML	No	Yes	No	No	No	No	No	No	No	No	No	No	No	No
GNG8	No	Yes	No	No	No	No	No	No	No	No	No	No	No	No
GNRHR	No	Yes	No	No	No	No	No	No	No	No	No	No	No	No
GPR22	No	Yes	No	No	No	Yes	No	No	No	No	No	No	No	No
GPR61	No	Yes	No	No	No	No	No	No	No	No	No	No	No	Yes
GRAMD1B	No	Yes	No	No	No	No	No	No	No	No	No	No	No	No
GRIK1	No	Yes	No	No	No	No	No	No	No	No	No	No	No	No
GSTA1	No	Yes	No	No	No	No	Yes	No	No	No	No	No	No	No
GSTA3	No	Yes	No	No	No	No	No	No	No	No	No	No	No	No
HCRTR1	No	Yes	No	No	No	No	No	No	No	No	No	No	No	No
HIST2H3PS2	No	Yes	No	No	No	No	No	No	No	No	No	Yes	No	No
HIST3H2A	No	Yes	No	No	No	No	No	No	No	No	No	No	No	No
HOXA5	No	Yes	No	No	No	No	No	No	No	No	No	No	No	No
HSD3B2	No	Yes	No	No	No	No	No	No	No	No	No	No	No	No
HSPA1B	No	Yes	No	No	No	No	No	No	No	No	No	No	No	No
IFITM10	No	Yes	No	No	No	No	No	No	No	No	No	No	No	No
IGLON5	No	Yes	No	No	No	No	No	No	No	No	No	No	No	No
IL1RAPL2	No	Yes	No	No	No	No	No	No	No	No	No	No	No	No
IL23R	No	Yes	No	No	No	No	No	No	No	No	No	No	No	No
INHA	No	Yes	No	No	No	No	No	No	Yes	No	No	No	No	No
INSM1	No	Yes	No	No	No	No	No	No	No	No	No	No	Yes	No
INSRR	No	Yes	No	No	No	No	No	No	No	No	No	No	No	No
KCNo4	No	Yes	No	No	No	No	No	No	No	No	No	No	No	No
KCNG3	No	Yes	No	No	No	No	No	No	No	No	No	No	No	No
KCNH5	No	Yes	No	No	No	No	No	No	No	No	No	No	No	No
KCNJ5	No	Yes	No	No	No	No	No	No	No	No	No	No	No	No
KCNK2	No	Yes	No	No	No	No	No	No	No	No	No	No	No	No
KCNK3	No	Yes	No	No	No	No	No	No	No	No	Yes	No	No	No
KCNK9	No	Yes	No	No	No	No	No	No	No	No	No	No	No	No
KCNMB4	No	Yes	No	No	No	No	No	No	No	No	No	No	No	No
KCNN2	No	Yes	No	No	No	No	No	No	No	No	No	No	No	No
KCNQ1	No	Yes	No	No	No	No	No	No	No	No	No	No	No	Yes
KIAA1024	No	Yes	No	No	No	No	No	No	No	No	No	No	No	No
KLHL4	No	Yes	No	No	No	No	No	No	No	No	No	No	No	No
L1CAM	No	Yes	No	No	No	No	No	No	No	No	No	No	No	No
LINGO4	No	Yes	No	No	No	No	No	No	No	No	No	No	No	No
LONRF2	No	Yes	No	No	No	No	No	No	No	No	No	No	No	No
LRRC38	No	Yes	No	No	No	No	No	No	No	No	No	No	No	No
LRRN3	No	Yes	No	No	No	No	No	No	No	No	No	No	No	Yes
LUZP2	No	Yes	No	No	No	No	No	No	No	No	No	No	No	No
MAB21L1	No	Yes	Yes	No	No	No	No	No	No	No	No	No	No	No
MAMSTR	No	Yes	No	No	No	No	No	No	No	No	No	No	No	No
MAP3K15	No	Yes	No	No	No	No	No	No	No	No	No	No	No	No
MAPK4	No	Yes	No	No	No	No	No	No	No	No	No	No	No	No
MC2R	No	Yes	No	No	No	No	No	No	No	No	No	No	No	No
MCF2	No	Yes	No	No	No	No	No	No	Yes	No	No	No	No	No
MCF2L2	No	Yes	No	No	No	No	No	No	No	No	No	Yes	No	No
MCOLN3	No	Yes	No	No	No	No	No	No	No	No	No	No	No	No
MGARP	No	Yes	No	No	No	No	No	No	No	No	No	No	No	No
MYO7A	No	Yes	No	No	No	No	No	No	No	No	No	No	No	No
MYT1	No	Yes	No	No	No	No	No	No	No	No	No	No	No	No
NCBP2L	No	Yes	No	No	No	No	No	No	No	No	No	No	No	No
NDRG4	No	Yes	No	No	No	Yes	No	No	No	No	No	No	No	No
NEUROD4	No	Yes	No	No	No	No	No	No	No	No	No	No	No	No
NGB	No	Yes	No	No	No	No	No	No	No	No	No	No	No	No
NGEF	No	Yes	No	No	No	No	No	No	No	No	No	No	No	No
NKAIN1	No	Yes	No	No	No	No	No	No	No	No	No	No	No	No
NOV	No	Yes	No	No	No	No	No	No	No	No	No	No	No	No
NPTX2	No	Yes	No	No	No	No	No	No	No	No	No	No	No	No
NPY	No	Yes	No	No	No	No	No	No	No	No	No	No	No	No
NR0B1	No	Yes	No	No	No	No	No	No	No	No	No	No	No	No
NR4A2	No	Yes	No	No	No	No	No	No	No	No	No	No	No	No
NR4A3	No	Yes	No	No	No	No	No	No	No	No	No	No	No	No
NR5A1	No	Yes	No	No	No	No	No	No	Yes	No	No	Yes	No	No
NRCAM	No	Yes	No	No	No	No	No	No	No	No	No	No	No	No
NTRK1	No	Yes	No	No	No	No	No	No	No	No	No	No	No	No
NXPH1	No	Yes	No	No	No	No	No	No	No	No	No	No	No	No
PABPC1L2A	No	Yes	No	No	No	No	No	No	No	No	No	No	No	No
PABPN1L	No	Yes	No	No	No	No	No	No	No	No	No	No	No	No
PCDH15	No	Yes	No	No	No	No	No	No	No	No	No	No	No	No
PCSK1N	No	Yes	No	No	No	No	No	No	No	No	No	No	Yes	No
PCSK2	No	Yes	No	No	No	No	No	No	No	No	No	No	No	No
PDGFD	No	Yes	No	No	No	No	No	No	No	No	No	No	No	No
PEG10	No	Yes	No	No	No	No	No	No	No	No	Yes	No	No	No
PENK	No	Yes	No	No	No	No	No	No	No	No	No	No	No	No
PHOX2A	No	Yes	No	No	No	No	No	No	No	No	No	No	No	No
PHOX2B	No	Yes	No	No	No	No	No	No	No	No	No	No	No	No
PIRT	No	Yes	No	No	No	No	No	No	No	No	No	No	No	No
PNMT	No	Yes	No	No	No	No	No	No	No	No	No	No	No	No
PPM1E	No	Yes	No	No	No	No	No	No	No	No	No	No	No	No
PPP1R17	No	Yes	No	No	No	No	No	No	No	No	No	No	No	No
PRLHR	No	Yes	No	No	No	No	No	No	No	No	No	No	No	No
PRPH	No	Yes	No	No	No	No	No	No	No	No	No	No	No	No
QPCT	No	Yes	No	No	No	No	No	No	No	No	No	No	No	No
RAB3C	No	Yes	No	No	No	No	No	No	No	No	No	No	No	No
RAET1G	No	Yes	No	No	Yes	No	No	No	No	No	No	No	No	No
RALYL	No	Yes	No	No	No	No	No	No	No	No	No	No	No	No
RAPGEF4	No	Yes	No	No	No	No	No	No	No	No	No	No	No	No
RARRES2	No	Yes	No	No	No	No	No	No	No	No	No	No	No	No
RBKS	No	Yes	No	No	No	No	No	No	No	No	No	No	No	No
REEP6	No	Yes	No	No	No	No	Yes	No	No	No	No	No	No	No
RET	No	Yes	No	No	No	No	No	No	No	No	No	No	No	No
RFX6	No	Yes	No	No	No	No	No	No	No	No	No	No	Yes	No
RGN	No	Yes	No	No	No	No	Yes	No	No	No	No	No	No	No
RGS7	No	Yes	No	No	No	No	No	No	No	No	No	No	No	No
RIMBP2	No	Yes	No	No	No	No	No	No	No	No	No	No	No	No
RIMS2	No	Yes	No	No	No	No	No	No	No	No	No	No	No	No
RTBDN	No	Yes	No	No	No	No	No	No	No	No	No	No	No	No
RTL1	No	Yes	No	No	No	No	No	No	No	No	Yes	No	No	No
SCARB1	No	Yes	No	No	No	No	No	No	No	No	Yes	No	No	No
SCD5	No	Yes	No	No	No	No	No	No	No	No	No	No	No	No
SCG2	No	Yes	No	No	No	No	No	No	No	No	No	No	No	No
SCG5	No	Yes	No	No	No	No	No	No	No	No	No	No	No	No
SEPT4	No	Yes	No	No	No	No	No	No	No	No	No	No	No	No
SERPINo5	No	Yes	No	No	No	No	Yes	No	No	No	No	No	No	No
SHH	No	Yes	No	No	No	No	No	No	No	No	No	No	Yes	No
SHISA8	No	Yes	No	No	No	No	No	No	No	No	No	No	No	No
SLC10A4	No	Yes	No	No	No	No	No	No	No	No	No	No	No	No
SLC16A9	No	Yes	No	No	No	No	No	No	No	No	No	No	No	No
SLC18A1	No	Yes	No	No	No	No	No	No	No	No	No	No	No	No
SLC27A6	No	Yes	No	No	No	No	No	No	No	No	No	No	No	No
SLC35D3	No	Yes	No	No	No	No	No	No	No	No	No	No	No	No
SLC47A1	No	Yes	No	No	No	No	No	No	No	No	No	No	No	No
SLC6A2	No	Yes	No	No	No	No	No	No	No	No	Yes	No	No	No
SLITRK4	No	Yes	No	No	No	No	No	No	No	No	No	No	No	No
SNCG	No	Yes	No	No	No	No	No	No	No	No	No	No	No	No
SOAT1	No	Yes	No	No	No	No	No	No	No	No	No	No	No	No
SSTR5	No	Yes	No	No	No	No	No	No	No	No	No	No	No	No
ST8SIA5	No	Yes	No	No	No	No	No	No	No	No	No	No	No	No
STAR	No	Yes	No	No	No	No	No	No	No	No	No	No	No	No
STK32A	No	Yes	No	No	No	No	No	No	No	No	No	No	No	Yes
SULT2A1	No	Yes	No	No	No	No	Yes	No	No	No	No	No	No	No
SV2C	No	Yes	No	No	No	No	No	No	No	No	No	No	No	No
SYT2	No	Yes	No	No	No	No	No	No	No	No	No	No	No	No
SYT4	No	Yes	No	No	No	No	No	No	No	No	No	No	No	No
TBX3	No	Yes	No	No	No	No	No	No	No	No	No	No	No	No
TCEAL6	No	Yes	No	No	No	No	No	No	No	No	No	No	No	No
TH	No	Yes	No	No	No	No	No	No	No	No	No	No	No	No
TLX2	No	Yes	No	No	No	No	No	No	No	No	No	No	No	No
TMEM130	No	Yes	No	No	No	No	No	No	No	No	No	No	No	No
TMEM179	No	Yes	No	No	No	No	No	No	No	No	No	No	No	No
TMEM200C	No	Yes	No	No	No	No	No	No	No	No	No	No	No	No
TMEM63C	No	Yes	No	No	No	No	No	No	No	No	No	No	No	No
TMIE	No	Yes	No	No	No	No	No	No	No	No	No	No	No	No
TNXB	No	Yes	No	No	No	No	No	No	No	No	No	No	No	No
TPBGL	No	Yes	No	No	No	No	No	No	No	No	No	No	No	No
TPD52L1	No	Yes	No	No	No	No	No	No	No	No	No	No	No	No
TUBB4A	No	Yes	No	No	No	No	No	No	No	No	No	No	No	No
UCP1	No	Yes	No	No	No	No	No	No	No	No	No	No	No	No
UNC5A	No	Yes	No	No	No	No	No	No	No	No	No	No	No	No
UNC80	No	Yes	No	No	No	No	No	No	No	No	No	No	No	No
UTS2	No	Yes	No	No	No	No	No	No	No	No	No	No	No	No
VAT1L	No	Yes	No	No	No	No	No	No	No	No	No	No	No	No
VEPH1	No	Yes	No	No	No	No	No	Yes	No	No	No	No	No	No
VSTM2A	No	Yes	No	No	No	No	No	No	No	No	No	No	No	No
WDR63	No	Yes	No	No	No	No	No	No	No	No	No	No	No	No
WNT8B	No	Yes	No	No	No	No	No	No	No	No	No	No	No	No
ZFR2	No	Yes	No	No	No	No	No	No	No	No	No	No	No	No
ZIM2	No	Yes	No	No	No	No	No	No	Yes	No	Yes	No	No	No
ABCA12	No	No	Yes	No	No	No	No	No	No	No	No	No	No	No
ABCC11	No	No	Yes	No	No	No	No	No	No	No	No	No	No	No
ACSM1	No	No	Yes	No	No	No	No	No	No	No	No	No	No	No
AKR1B15	No	No	Yes	No	No	No	No	No	No	No	No	No	No	No
ALDH3B2	No	No	Yes	No	Yes	No	No	No	No	No	No	No	No	No
ALOX15B	No	No	Yes	No	No	No	No	No	No	No	No	No	No	No
ALX4	No	No	Yes	No	No	No	No	No	No	No	No	No	No	No
ANGPTL5	No	No	Yes	No	No	No	No	No	Yes	No	No	No	No	No
ANKRD30A	No	No	Yes	No	No	No	No	No	No	No	No	No	No	No
APCDD1L	No	No	Yes	No	No	No	No	No	No	No	No	No	No	No
APOD	No	No	Yes	No	No	No	No	No	No	No	No	No	No	No
ARHGAP40	No	No	Yes	No	Yes	No	No	No	No	No	No	No	No	No
ARHGEF38	No	No	Yes	No	No	No	No	No	No	No	No	No	No	No
ATP13A5	No	No	Yes	No	No	No	No	No	No	No	No	No	No	No
ATP6V1B1	No	No	Yes	No	No	No	No	No	No	No	Yes	No	No	No
AWAT2	No	No	Yes	No	No	No	No	No	No	No	No	No	No	No
AZGP1	No	No	Yes	No	No	No	Yes	No	No	No	No	No	No	No
BTN1A1	No	No	Yes	No	No	No	No	No	No	No	No	No	No	No
C10ORF90	No	No	Yes	No	No	No	No	No	No	No	No	No	No	No
C2ORF82	No	No	Yes	No	No	No	No	No	No	No	No	No	No	No
C5ORF46	No	No	Yes	No	No	No	No	No	No	No	No	No	No	No
CARD18	No	No	Yes	No	No	No	No	No	No	No	No	No	No	No
CCL28	No	No	Yes	No	No	No	No	No	No	No	No	No	No	No
CHIT1	No	No	Yes	No	No	No	No	Yes	No	No	No	No	No	No
CLDN8	No	No	Yes	No	No	No	No	No	No	No	No	No	No	No
CLEC3A	No	No	Yes	No	No	No	No	No	No	No	No	No	No	No
CLPSL1	No	No	Yes	No	No	No	No	No	No	Yes	No	No	No	No
CMA1	No	No	Yes	No	No	No	No	No	No	No	No	No	No	No
CSN1S1	No	No	Yes	No	No	No	No	No	No	No	No	No	No	No
CSN2	No	No	Yes	No	No	No	No	No	No	No	No	No	No	No
CSN3	No	No	Yes	No	No	No	No	No	No	No	No	No	No	No
CST9	No	No	Yes	No	No	No	No	No	No	No	No	No	No	No
CYP4Z1	No	No	Yes	No	No	No	No	No	No	No	No	No	No	No
DCD	No	No	Yes	No	No	No	No	No	No	No	No	No	No	No
DGAT2L6	No	No	Yes	No	No	No	No	No	No	No	No	No	No	No
DHRS2	No	No	Yes	No	No	No	No	No	No	No	No	No	No	No
EFHD1	No	No	Yes	No	No	No	No	No	No	No	No	No	No	No
ELF5	No	No	Yes	No	No	No	No	No	No	No	No	No	No	No
ESR1	No	No	Yes	No	No	No	No	No	No	No	No	No	No	No
FABP7	No	No	Yes	No	No	No	No	No	No	No	No	No	No	No
FABP9	No	No	Yes	No	No	No	No	No	No	No	No	No	No	No
FAM180B	No	No	Yes	No	No	No	No	No	No	No	No	No	No	No
FOXI1	No	No	Yes	No	No	No	No	No	No	No	No	No	No	No
GJC3	No	No	Yes	No	No	No	No	No	No	No	No	No	No	No
GLRA3	No	No	Yes	No	No	No	No	No	No	No	No	No	No	No
GLYATL2	No	No	Yes	No	No	No	No	No	No	No	No	No	No	No
GPR88	No	No	Yes	No	No	No	Yes	No	Yes	No	No	Yes	No	No
GRPR	No	No	Yes	No	No	No	No	No	No	Yes	No	No	No	No
GSTM5	No	No	Yes	No	No	No	No	No	Yes	No	No	No	No	No
GSTT2B	No	No	Yes	No	No	No	No	No	No	No	No	No	No	No
HCAR1	No	No	Yes	No	No	No	No	No	No	No	No	No	No	No
HIST1H2AE	No	No	Yes	No	No	No	No	No	No	No	No	No	No	No
HIST1H2BF	No	No	Yes	No	Yes	No	No	No	No	No	No	No	No	No
HIST1H2BG	No	No	Yes	No	No	No	No	No	No	No	No	No	No	No
HIST1H4H	No	No	Yes	No	No	No	No	No	No	No	No	No	No	No
IL17B	No	No	Yes	No	No	No	No	No	No	No	No	No	No	No
IL22RA2	No	No	Yes	No	No	No	No	No	No	No	No	No	No	No
IRX1	No	No	Yes	No	No	No	No	No	No	No	No	No	No	No
IRX2	No	No	Yes	No	No	No	No	Yes	No	No	No	No	No	No
IRX3	No	No	Yes	No	No	No	No	No	No	No	No	No	No	No
IRX5	No	No	Yes	No	No	No	No	Yes	No	No	No	No	No	No
KIT	No	No	Yes	No	No	No	No	No	No	No	No	No	No	No
KLRG2	No	No	Yes	No	Yes	No	No	Yes	No	No	No	No	No	Yes
KRT15	No	No	Yes	No	Yes	No	No	No	No	No	No	No	No	No
KRT17	No	No	Yes	No	No	No	No	No	No	No	No	No	No	No
KRT25	No	No	Yes	No	No	No	No	No	No	No	No	No	No	No
KRT27	No	No	Yes	No	No	No	No	No	No	No	No	No	No	No
KRT28	No	No	Yes	No	No	No	No	No	No	No	No	No	No	No
KRT71	No	No	Yes	No	No	No	No	No	No	No	No	No	No	No
KRT74	No	No	Yes	No	No	No	No	No	No	No	No	No	No	No
KRT79	No	No	Yes	No	No	No	No	No	No	No	No	No	No	No
KRT81	No	No	Yes	No	No	No	No	No	No	No	No	No	No	No
KRTAP21-1	No	No	Yes	No	No	No	No	No	No	No	No	No	No	No
LALBA	No	No	Yes	No	No	No	No	No	No	No	No	No	No	No
LGALS7	No	No	Yes	No	Yes	No	No	No	No	No	No	No	No	No
LGALS7B	No	No	Yes	No	Yes	No	No	No	No	No	No	No	No	No
LMX1B	No	No	Yes	No	No	No	No	No	No	No	No	No	No	No
MAP1LC3C	No	No	Yes	No	No	No	No	No	No	No	Yes	No	No	No
MATN4	No	No	Yes	No	No	No	No	No	No	Yes	No	No	No	No
MGP	No	No	Yes	No	No	No	No	No	No	No	No	No	No	No
MIA	No	No	Yes	No	No	No	No	No	No	No	No	No	Yes	No
MMP27	No	No	Yes	No	No	No	No	No	No	No	No	No	No	No
MRGPRX2	No	No	Yes	No	No	No	No	No	No	No	No	No	No	No
MS4A18	No	No	Yes	No	No	No	No	No	No	No	No	No	No	No
MUCL1	No	No	Yes	No	No	No	No	No	No	No	No	No	No	No
NEK10	No	No	Yes	No	No	No	No	No	No	No	No	No	No	No
NPY2R	No	No	Yes	No	No	No	No	No	No	No	No	No	No	No
NQO1	No	No	Yes	No	No	No	No	No	No	No	No	No	Yes	No
OBP2B	No	No	Yes	No	No	No	No	No	No	No	No	No	No	No
OXGR1	No	No	Yes	No	No	No	No	No	No	No	No	No	No	No
OXTR	No	No	Yes	No	No	No	No	No	No	No	No	No	No	No
PAX3	No	No	Yes	No	No	No	No	No	No	No	No	No	No	No
PIP	No	No	Yes	No	No	No	No	No	No	No	No	No	No	No
PNLIPRP3	No	No	Yes	No	No	No	No	No	No	No	No	No	No	No
PTHLH	No	No	Yes	No	No	No	No	No	No	No	No	No	No	No
PVALB	No	No	Yes	No	No	No	No	No	No	No	No	No	No	No
RAB6C	No	No	Yes	No	No	No	No	No	No	No	No	No	No	No
RNoSE12	No	No	Yes	No	No	No	No	No	No	No	No	No	No	No
RNF39	No	No	Yes	No	No	No	No	No	No	No	No	No	No	No
SCGB1D2	No	No	Yes	No	No	No	No	No	No	No	No	No	No	No
SCGB2A2	No	No	Yes	No	No	No	No	No	No	No	No	No	No	No
SCGB3A1	No	No	Yes	No	No	No	No	Yes	No	No	No	No	No	No
SDR16C5	No	No	Yes	No	Yes	No	No	Yes	No	No	No	No	Yes	No
SERHL2	No	No	Yes	No	No	No	No	No	No	No	No	No	No	No
SFRP1	No	No	Yes	No	No	No	No	No	No	No	No	No	No	No
SHISA2	No	No	Yes	No	No	No	No	No	No	No	No	No	No	Yes
SLC28A3	No	No	Yes	No	No	No	No	No	No	No	No	No	No	No
SLCO1B7	No	No	Yes	No	No	No	No	No	No	No	No	No	No	No
SPINK14	No	No	Yes	No	No	No	No	No	No	No	No	No	No	No
SPINK8	No	No	Yes	No	No	No	No	No	No	No	No	No	No	No
ST8SIA6	No	No	Yes	No	No	No	No	Yes	No	No	No	No	No	No
STAC2	No	No	Yes	No	No	No	No	No	No	No	No	No	No	No
STC2	No	No	Yes	No	No	No	No	No	No	No	No	No	No	No
SULT1C3	No	No	Yes	No	No	No	No	No	No	No	No	No	No	No
SYCP2	No	No	Yes	No	No	No	No	No	No	No	No	No	No	No
TFAP2A	No	No	Yes	No	No	No	No	No	No	No	Yes	No	No	No
TFAP2B	No	No	Yes	No	No	No	No	No	No	No	No	No	No	No
TRPS1	No	No	Yes	No	No	No	No	No	No	No	No	No	No	No
UGT2B11	No	No	Yes	No	No	No	No	No	No	No	No	No	No	No
UGT2B28	No	No	Yes	No	No	No	No	No	No	No	No	No	No	No
VTCN1	No	No	Yes	No	No	No	No	No	No	No	No	No	No	No
WISP3	No	No	Yes	No	No	No	No	No	No	No	No	No	No	No
XDH	No	No	Yes	No	No	No	Yes	No	No	No	No	No	No	No
ZNF80	No	No	Yes	No	No	No	No	No	No	No	No	No	No	No
AIFM3	No	No	No	Yes	No	No	No	No	No	No	No	No	No	No
AMN	No	No	No	Yes	No	No	No	No	No	No	No	No	No	No
AQP8	No	No	No	Yes	No	No	No	No	No	Yes	No	No	No	No
ATOH1	No	No	No	Yes	No	No	No	No	No	No	No	No	No	No
ATP10B	No	No	No	Yes	No	No	No	No	No	No	No	No	No	No
B3GALT1	No	No	No	Yes	No	No	No	No	No	No	No	No	No	No
B3GALT5	No	No	No	Yes	No	No	No	No	No	No	No	No	No	No
B3GNT6	No	No	No	Yes	No	No	No	No	No	No	No	No	Yes	No
B4GALNT2	No	No	No	Yes	No	No	No	No	No	No	No	No	No	No
BCL2L15	No	No	No	Yes	No	No	No	No	No	No	No	No	No	No
BEST2	No	No	No	Yes	No	No	No	No	No	No	No	No	No	No
BEST4	No	No	No	Yes	No	No	No	No	No	No	No	No	No	No
BTNL3	No	No	No	Yes	No	No	No	No	No	No	No	No	No	No
BTNL8	No	No	No	Yes	No	No	No	No	No	No	No	No	No	No
C10ORF99	No	No	No	Yes	Yes	No	No	No	No	No	No	No	No	No
C15ORF48	No	No	No	Yes	No	No	No	No	No	No	No	No	No	No
CA1	No	No	No	Yes	No	No	No	No	No	No	No	No	No	No
CA2	No	No	No	Yes	No	No	No	No	No	No	No	No	Yes	No
CA4	No	No	No	Yes	No	No	No	No	No	No	No	No	No	No
CA7	No	No	No	Yes	No	No	No	No	No	No	No	No	No	No
CASP5	No	No	No	Yes	No	No	No	No	No	No	No	No	No	No
CDC42EP5	No	No	No	Yes	No	No	No	No	No	No	No	No	No	No
CDH17	No	No	No	Yes	No	No	No	No	No	No	No	No	No	No
CDHR5	No	No	No	Yes	No	No	Yes	No	No	No	No	No	No	No
CDX1	No	No	No	Yes	No	No	No	No	No	No	No	No	No	No
CDX2	No	No	No	Yes	No	No	No	No	No	No	No	No	No	No
CEACAM1	No	No	No	Yes	No	No	No	No	No	No	No	No	No	No
CEACAM5	No	No	No	Yes	No	No	No	No	No	No	No	No	No	No
CEACAM6	No	No	No	Yes	Yes	No	No	Yes	No	No	No	No	No	No
CEACAM7	No	No	No	Yes	No	No	No	No	No	No	No	No	No	No
CES3	No	No	No	Yes	No	No	No	No	No	No	No	No	No	No
CHP2	No	No	No	Yes	No	No	No	No	No	No	No	No	No	No
CHST5	No	No	No	Yes	No	No	No	No	No	No	No	No	No	No
CKMT1B	No	No	No	Yes	No	No	No	No	No	No	No	No	No	No
CLCA1	No	No	No	Yes	No	No	No	No	No	No	No	No	No	No
CLCA4	No	No	No	Yes	Yes	No	No	No	No	No	No	No	No	No
CLDN23	No	No	No	Yes	No	No	No	No	No	No	No	No	Yes	No
CLDN3	No	No	No	Yes	No	No	No	No	No	No	No	No	No	No
CLRN3	No	No	No	Yes	No	No	Yes	No	No	No	No	No	No	No
DHRS11	No	No	No	Yes	No	No	No	No	No	No	No	No	No	No
DHRS9	No	No	No	Yes	No	No	No	No	No	No	No	No	No	No
EFNo2	No	No	No	Yes	No	No	No	No	No	No	No	No	No	No
ENTPD8	No	No	No	Yes	No	No	No	No	No	No	No	No	No	No
EPCAM	No	No	No	Yes	No	No	No	No	No	No	No	No	No	No
EPS8L3	No	No	No	Yes	No	No	No	No	No	No	No	No	Yes	No
ERN2	No	No	No	Yes	No	No	No	No	No	No	No	No	Yes	No
FABP1	No	No	No	Yes	No	No	Yes	No	No	No	No	No	No	No
FAM3D	No	No	No	Yes	No	No	No	No	No	No	No	No	No	No
FCGBP	No	No	No	Yes	No	No	No	No	No	No	No	No	No	No
FFAR4	No	No	No	Yes	No	No	No	No	No	No	No	No	No	No
FOXA3	No	No	No	Yes	No	No	Yes	No	No	Yes	No	No	Yes	No
FOXD2	No	No	No	Yes	No	No	No	No	No	No	No	No	No	No
FRMD1	No	No	No	Yes	No	No	No	No	No	No	No	No	Yes	No
FUT3	No	No	No	Yes	Yes	No	No	No	No	No	No	No	No	No
FXYD3	No	No	No	Yes	No	No	No	No	No	No	No	No	No	No
GAL3ST2	No	No	No	Yes	No	No	No	No	No	No	No	No	No	No
GCNT3	No	No	No	Yes	No	No	No	No	No	No	No	No	No	No
GLRA2	No	No	No	Yes	No	No	No	No	No	No	No	No	No	No
GPA33	No	No	No	Yes	No	No	No	No	No	No	No	No	No	No
GPR15	No	No	No	Yes	No	No	No	No	No	No	No	No	No	No
GUCA2A	No	No	No	Yes	No	No	No	No	No	No	No	No	No	No
GUCA2B	No	No	No	Yes	No	No	No	No	No	No	No	No	No	No
GUCY2C	No	No	No	Yes	No	No	No	No	No	No	No	No	No	No
HAVCR1	No	No	No	Yes	No	No	No	No	No	No	No	No	No	No
HEPACAM2	No	No	No	Yes	No	No	No	No	No	No	No	No	No	No
HHLA2	No	No	No	Yes	No	No	No	No	No	No	No	No	No	No
HNF4A	No	No	No	Yes	No	No	Yes	No	No	No	No	No	Yes	No
HOXB9	No	No	No	Yes	No	No	No	No	No	No	No	No	No	No
HOXD12	No	No	No	Yes	No	No	No	No	No	No	No	No	No	No
HOXD13	No	No	No	Yes	No	No	No	No	No	No	No	No	No	No
HSD11B2	No	No	No	Yes	No	No	No	No	No	No	No	No	No	No
IHH	No	No	No	Yes	No	No	No	No	No	No	No	No	Yes	No
IL22RA1	No	No	No	Yes	Yes	No	No	No	No	Yes	No	No	No	No
INSL5	No	No	No	Yes	No	No	No	No	No	No	No	No	No	No
ISX	No	No	No	Yes	No	No	No	No	No	No	No	No	No	No
ITLN1	No	No	No	Yes	No	No	No	No	No	No	No	No	No	No
KLK15	No	No	No	Yes	No	No	No	No	No	No	No	No	No	No
KRT20	No	No	No	Yes	No	No	No	No	No	No	No	No	No	No
KRTAP13-2	No	No	No	Yes	No	No	No	No	No	No	No	No	No	No
LEFTY1	No	No	No	Yes	No	No	No	No	No	Yes	No	No	No	No
LGALS4	No	No	No	Yes	No	No	No	No	No	No	No	No	No	No
LRRC19	No	No	No	Yes	No	No	No	No	No	No	No	No	No	No
LRRC26	No	No	No	Yes	No	No	No	No	No	No	No	No	No	No
LYPD8	No	No	No	Yes	No	No	No	No	No	No	No	No	No	No
MAB21L2	No	No	No	Yes	No	No	No	No	No	No	No	No	No	No
MEP1A	No	No	No	Yes	No	No	No	No	No	No	No	No	No	No
MISP	No	No	No	Yes	No	No	No	No	No	No	No	No	No	No
MOGAT2	No	No	No	Yes	No	No	Yes	No	No	No	No	No	No	No
MOGAT3	No	No	No	Yes	No	No	No	No	No	No	No	No	No	No
MS4A12	No	No	No	Yes	No	No	No	No	No	No	No	No	No	No
MUC12	No	No	No	Yes	No	No	No	No	No	No	No	No	No	No
MUC13	No	No	No	Yes	No	No	No	No	No	No	No	No	No	No
MUC4	No	No	No	Yes	No	No	No	No	No	No	No	No	No	No
MYO1A	No	No	No	Yes	No	No	No	No	No	No	No	No	No	No
NoT2	No	No	No	Yes	No	No	Yes	No	No	No	No	No	No	No
NEU4	No	No	No	Yes	No	No	Yes	No	No	No	No	No	No	No
NOS2	No	No	No	Yes	No	No	No	No	No	No	No	No	No	No
NOX1	No	No	No	Yes	No	No	No	No	No	No	No	No	No	No
NOXO1	No	No	No	Yes	No	No	No	No	No	No	No	No	No	No
NPY4R	No	No	No	Yes	No	No	No	No	No	No	No	No	No	No
NR1I2	No	No	No	Yes	No	No	Yes	No	No	No	No	No	No	No
NRARP	No	No	No	Yes	No	No	No	No	No	No	No	No	No	No
NXPE1	No	No	No	Yes	No	No	No	No	No	No	No	No	No	No
NXPE2	No	No	No	Yes	No	No	No	No	No	No	No	No	No	No
NXPE4	No	No	No	Yes	No	No	No	No	No	No	No	No	No	No
OTOP2	No	No	No	Yes	No	No	No	No	No	No	No	No	No	No
PADI2	No	No	No	Yes	No	No	No	No	No	No	No	No	No	No
PIGR	No	No	No	Yes	No	No	No	No	No	No	No	No	No	No
PIGY	No	No	No	Yes	No	No	No	No	No	No	No	No	No	No
PIGZ	No	No	No	Yes	No	No	No	No	No	No	No	No	No	No
PKIB	No	No	No	Yes	No	No	No	No	No	No	Yes	No	No	No
PLA2G10	No	No	No	Yes	No	No	No	No	No	No	No	No	Yes	No
PPP1R14D	No	No	No	Yes	No	No	No	No	No	No	No	No	No	No
PRAC1	No	No	No	Yes	No	No	No	No	No	No	No	No	No	No
PYY	No	No	No	Yes	No	No	No	No	No	No	No	No	No	No
REG4	No	No	No	Yes	No	No	No	No	No	No	No	No	No	No
RETNLB	No	No	No	Yes	No	No	No	No	No	No	No	No	No	No
RXFP4	No	No	No	Yes	No	No	No	No	No	No	No	No	No	No
SATB2	No	No	No	Yes	No	No	No	No	No	No	No	No	No	No
SLC17A4	No	No	No	Yes	No	No	Yes	No	No	No	No	No	No	No
SLC22A18AS	No	No	No	Yes	No	No	No	No	No	No	No	No	No	No
SLC26A2	No	No	No	Yes	No	No	No	No	No	No	No	No	No	No
SLC26A3	No	No	No	Yes	No	No	No	No	No	No	No	No	No	No
SLC39A5	No	No	No	Yes	No	No	Yes	No	No	Yes	No	No	No	No
SLC9A2	No	No	No	Yes	No	No	No	No	No	No	No	No	Yes	No
SLC9A3	No	No	No	Yes	No	No	No	No	No	No	No	No	No	No
SPINK4	No	No	No	Yes	No	No	No	No	No	No	No	No	No	No
ST6GALNoC1	No	No	No	Yes	No	No	No	No	No	No	No	No	No	No
SULT1B1	No	No	No	Yes	No	No	No	No	No	No	No	No	Yes	No
TBX10	No	No	No	Yes	No	No	No	No	No	No	No	No	No	No
TFF3	No	No	No	Yes	No	No	No	No	No	No	No	No	No	Yes
TMEM236	No	No	No	Yes	No	No	No	No	No	No	No	No	No	No
TMIGD1	No	No	No	Yes	No	No	No	No	No	No	No	No	No	No
TPH1	No	No	No	Yes	No	No	No	No	No	No	No	No	Yes	No
TPSG1	No	No	No	Yes	No	No	No	No	No	No	No	No	No	No
TRABD2A	No	No	No	Yes	No	No	No	No	Yes	No	No	No	No	No
TRIM15	No	No	No	Yes	No	No	No	No	No	No	No	No	No	No
TRIM31	No	No	No	Yes	No	No	No	No	No	No	No	No	Yes	No
TRPM5	No	No	No	Yes	No	No	No	No	No	No	No	No	No	No
TRPM6	No	No	No	Yes	No	No	No	No	No	No	No	No	No	No
TSPAN1	No	No	No	Yes	No	No	No	No	No	No	No	No	No	No
TSPAN8	No	No	No	Yes	No	No	No	No	No	No	No	No	No	No
UGT1A10	No	No	No	Yes	No	No	No	No	No	No	No	No	No	No
UGT1A8	No	No	No	Yes	No	No	No	No	No	No	No	No	No	No
UGT2B17	No	No	No	Yes	No	No	No	No	No	No	No	No	No	No
URAD	No	No	No	Yes	No	No	No	No	No	No	No	No	No	No
VIL1	No	No	No	Yes	No	No	No	No	No	No	No	No	No	No
VIP	No	No	No	Yes	No	No	No	No	No	No	No	No	No	No
ZG16	No	No	No	Yes	No	No	No	No	No	No	No	No	No	No
A2ML1	No	No	No	No	Yes	No	No	No	No	No	No	No	No	No
ADH7	No	No	No	No	Yes	No	No	No	No	No	No	No	No	No
ALDH3A1	No	No	No	No	Yes	No	No	No	No	No	No	No	Yes	No
ALOX12	No	No	No	No	Yes	No	No	No	No	No	No	No	No	No
ANXA1	No	No	No	No	Yes	No	No	No	No	No	No	No	No	No
ANXA8	No	No	No	No	Yes	No	No	No	No	No	No	No	No	No
ANXA8L1	No	No	No	No	Yes	No	No	No	No	No	No	No	No	No
ARNTL2	No	No	No	No	Yes	No	No	No	No	No	No	No	No	No
ATG9B	No	No	No	No	Yes	No	No	No	No	No	Yes	No	No	No
ATP12A	No	No	No	No	Yes	No	No	No	No	No	Yes	No	No	No
BARX2	No	No	No	No	Yes	No	No	No	No	No	No	No	No	No
BNIPL	No	No	No	No	Yes	No	No	No	No	No	No	No	No	No
BPIFB2	No	No	No	No	Yes	No	No	No	No	No	No	No	No	No
BTBD11	No	No	No	No	Yes	No	No	No	No	No	No	No	No	Yes
C15ORF62	No	No	No	No	Yes	No	No	No	No	No	No	No	No	No
C1ORF116	No	No	No	No	Yes	No	No	Yes	No	No	No	No	No	No
C1QTNF3	No	No	No	No	Yes	No	No	No	No	No	No	No	No	No
CALML3	No	No	No	No	Yes	No	No	No	No	No	No	No	No	No
CAPN14	No	No	No	No	Yes	No	No	No	No	No	No	No	No	No
CAPNS2	No	No	No	No	Yes	No	No	No	No	No	No	No	No	No
CD1A	No	No	No	No	Yes	No	No	No	No	No	No	No	No	No
CERS3	No	No	No	No	Yes	No	No	No	No	No	No	No	No	No
CHAC1	No	No	No	No	Yes	No	No	No	No	No	No	No	No	No
CLCA2	No	No	No	No	Yes	No	No	No	No	No	No	No	No	No
CLDN17	No	No	No	No	Yes	No	No	No	No	No	No	No	No	No
CLIC3	No	No	No	No	Yes	No	No	No	No	No	No	No	No	Yes
CNFN	No	No	No	No	Yes	No	No	No	No	No	No	No	No	No
CRABP2	No	No	No	No	Yes	No	No	No	No	No	No	No	No	No
CRCT1	No	No	No	No	Yes	No	No	No	No	No	No	No	No	No
CRNN	No	No	No	No	Yes	No	No	No	No	No	No	No	No	No
CSTA	No	No	No	No	Yes	No	No	No	No	No	No	No	No	No
CSTB	No	No	No	No	Yes	No	No	No	No	No	No	No	No	No
CXCL17	No	No	No	No	Yes	No	No	Yes	No	No	No	No	Yes	No
CYP2C18	No	No	No	No	Yes	No	Yes	No	No	No	No	No	Yes	No
CYP4F22	No	No	No	No	Yes	No	No	No	No	No	No	No	No	No
DAPL1	No	No	No	No	Yes	No	No	No	No	No	No	No	No	No
DEFB4A	No	No	No	No	Yes	No	No	No	No	No	No	No	No	No
DENND2C	No	No	No	No	Yes	No	No	No	No	No	No	No	No	No
DKK4	No	No	No	No	Yes	No	No	No	No	No	No	No	No	No
DSC2	No	No	No	No	Yes	No	No	No	No	No	No	No	No	No
DSC3	No	No	No	No	Yes	No	No	No	No	No	No	No	No	No
DSG3	No	No	No	No	Yes	No	No	No	No	No	No	No	No	No
DSP	No	No	No	No	Yes	No	No	No	No	No	No	No	No	No
DUOX1	No	No	No	No	Yes	No	No	No	No	No	No	No	No	Yes
DUOXA1	No	No	No	No	Yes	No	No	No	No	No	No	No	No	Yes
DYNoP	No	No	No	No	Yes	No	No	No	No	No	No	No	No	No
ECM1	No	No	No	No	Yes	No	No	No	No	No	No	No	No	No
EDN2	No	No	No	No	Yes	No	No	No	No	No	No	No	No	No
ENDOU	No	No	No	No	Yes	No	No	No	No	No	No	No	No	No
EPGN	No	No	No	No	Yes	No	No	No	No	No	No	No	No	No
EPHA1	No	No	No	No	Yes	No	No	No	No	No	No	No	No	No
EPHA2	No	No	No	No	Yes	No	No	No	No	No	No	No	No	No
EPHX3	No	No	No	No	Yes	No	No	No	No	No	No	No	No	No
ESPL1	No	No	No	No	Yes	No	No	No	No	No	No	No	No	No
EVPL	No	No	No	No	Yes	No	No	No	No	No	No	No	No	No
EVPLL	No	No	No	No	Yes	No	No	No	No	No	No	No	No	No
FABP12	No	No	No	No	Yes	No	No	No	No	No	No	No	No	No
FAM46B	No	No	No	No	Yes	No	No	No	No	No	No	No	No	No
FAM83A	No	No	No	No	Yes	No	No	No	No	No	No	No	No	No
FAM83C	No	No	No	No	Yes	No	No	No	No	No	No	No	No	No
FAM83D	No	No	No	No	Yes	No	No	No	No	No	No	No	No	No
FGFBP1	No	No	No	No	Yes	No	No	No	No	No	No	No	No	No
FUT6	No	No	No	No	Yes	No	No	No	No	No	No	No	No	No
FZD10	No	No	No	No	Yes	No	No	No	No	No	No	No	No	No
GBP6	No	No	No	No	Yes	No	No	No	No	No	No	No	No	No
GJB2	No	No	No	No	Yes	No	No	No	No	No	No	No	No	No
GJB3	No	No	No	No	Yes	No	No	No	No	No	No	No	No	No
GJB5	No	No	No	No	Yes	No	No	No	No	No	No	No	No	No
GJB6	No	No	No	No	Yes	No	No	No	No	No	No	No	No	No
GNo15	No	No	No	No	Yes	No	No	No	No	No	No	No	No	No
GPR87	No	No	No	No	Yes	No	No	No	No	No	No	No	No	No
GRHL1	No	No	No	No	Yes	No	No	No	No	No	No	No	No	No
GRHL3	No	No	No	No	Yes	No	No	No	No	No	No	No	No	No
GRPEL2	No	No	No	No	Yes	No	No	No	No	No	No	No	No	No
GSDMC	No	No	No	No	Yes	No	No	No	No	No	No	Yes	No	No
HEPHL1	No	No	No	No	Yes	No	No	No	No	No	No	No	No	No
HOPX	No	No	No	No	Yes	No	No	No	No	No	No	No	No	No
IGFL1	No	No	No	No	Yes	No	No	No	No	No	No	No	No	No
IL12A	No	No	No	No	Yes	No	No	No	No	No	No	No	No	No
IL1A	No	No	No	No	Yes	No	No	No	No	No	No	No	No	No
IL1RN	No	No	No	No	Yes	No	No	No	No	No	No	No	No	No
IL20RB	No	No	No	No	Yes	No	No	No	No	No	No	No	No	No
IL36A	No	No	No	No	Yes	No	No	No	No	No	No	No	No	No
IL36B	No	No	No	No	Yes	No	No	No	No	No	No	No	No	No
IL36RN	No	No	No	No	Yes	No	No	No	No	No	No	No	No	No
IVL	No	No	No	No	Yes	No	No	No	No	No	No	No	No	No
JUP	No	No	No	No	Yes	No	No	No	No	No	No	No	No	No
KLK10	No	No	No	No	Yes	No	No	No	No	No	No	No	No	No
KLK11	No	No	No	No	Yes	No	No	No	No	No	No	No	No	No
KLK12	No	No	No	No	Yes	No	No	No	No	No	No	No	No	No
KLK13	No	No	No	No	Yes	No	No	No	No	No	No	No	No	No
KLK6	No	No	No	No	Yes	No	No	No	No	No	No	No	No	No
KLK7	No	No	No	No	Yes	No	No	No	No	No	No	No	No	No
KLK8	No	No	No	No	Yes	No	No	No	No	No	No	No	No	No
KRT13	No	No	No	No	Yes	No	No	No	No	No	No	No	No	No
KRT16	No	No	No	No	Yes	No	No	No	No	No	No	No	No	No
KRT24	No	No	No	No	Yes	No	No	No	No	No	No	No	No	No
KRT3	No	No	No	No	Yes	No	No	No	No	No	No	No	No	No
KRT31	No	No	No	No	Yes	No	No	No	No	No	No	No	No	No
KRT32	No	No	No	No	Yes	No	No	No	No	No	No	No	No	No
KRT33A	No	No	No	No	Yes	No	No	No	No	No	No	No	No	No
KRT4	No	No	No	No	Yes	No	No	No	No	No	No	No	No	No
KRT5	No	No	No	No	Yes	No	No	No	No	No	No	No	No	No
KRT6A	No	No	No	No	Yes	No	No	No	No	No	No	No	No	No
KRT6B	No	No	No	No	Yes	No	No	No	No	No	No	No	No	No
KRT6C	No	No	No	No	Yes	No	No	No	No	No	No	No	No	No
KRT78	No	No	No	No	Yes	No	No	No	No	No	No	No	No	No
KRT80	No	No	No	No	Yes	No	No	No	No	No	No	No	No	No
KRTAP3-2	No	No	No	No	Yes	No	No	No	No	No	No	No	No	No
LAD1	No	No	No	No	Yes	No	No	No	No	No	No	No	No	No
LCE3E	No	No	No	No	Yes	No	No	No	No	No	No	No	No	No
LTB4R	No	No	No	No	Yes	No	No	No	No	No	No	No	No	No
LY6D	No	No	No	No	Yes	No	No	No	No	No	No	No	No	No
LYPD2	No	No	No	No	Yes	No	No	No	No	No	No	No	No	No
LYPD3	No	No	No	No	Yes	No	No	No	No	No	No	No	No	No
MAB21L3	No	No	No	No	Yes	No	No	No	No	No	No	No	No	No
MAL	No	No	No	No	Yes	No	No	No	No	No	No	No	No	No
MALL	No	No	No	No	Yes	No	No	No	No	No	No	No	No	No
MPZL2	No	No	No	No	Yes	No	No	No	No	No	No	No	No	No
MUC21	No	No	No	No	Yes	No	No	No	No	No	No	No	No	No
MUC22	No	No	No	No	Yes	No	No	No	No	No	No	No	No	No
MXD1	No	No	No	No	Yes	No	No	No	No	No	No	No	No	No
MYH3	No	No	No	No	Yes	No	No	No	No	No	No	No	No	No
MYH8	No	No	No	No	Yes	No	No	No	No	No	No	No	No	No
NCCRP1	No	No	No	No	Yes	No	No	No	No	No	No	No	No	No
NDUFA4L2	No	No	No	No	Yes	No	No	No	No	No	No	No	No	No
NIPAL1	No	No	No	No	Yes	No	No	No	No	No	No	No	No	No
NKX6-1	No	No	No	No	Yes	No	No	No	No	No	No	No	No	Yes
NMU	No	No	No	No	Yes	No	No	No	No	No	No	No	No	No
OVOL1	No	No	No	No	Yes	No	No	No	No	No	No	No	No	No
P2RY2	No	No	No	No	Yes	No	No	No	No	No	No	No	No	No
PADI1	No	No	No	No	Yes	No	No	No	No	No	No	No	No	No
PADI3	No	No	No	No	Yes	No	No	No	No	No	No	No	No	No
PAX9	No	No	No	No	Yes	No	No	No	No	No	No	No	No	No
PERP	No	No	No	No	Yes	No	No	No	No	No	No	No	No	No
PGLYRP3	No	No	No	No	Yes	No	No	No	No	No	No	No	No	No
PGLYRP4	No	No	No	No	Yes	No	No	No	No	No	No	No	No	No
PI3	No	No	No	No	Yes	No	No	No	No	No	No	No	No	No
PITX1	No	No	No	No	Yes	No	No	No	No	No	No	No	No	No
PKP1	No	No	No	No	Yes	No	No	No	No	No	No	No	No	No
PKP3	No	No	No	No	Yes	No	No	No	No	No	No	No	No	No
PLA2G2C	No	No	No	No	Yes	No	No	No	No	No	No	No	No	No
PLA2G3	No	No	No	No	Yes	No	No	Yes	No	No	No	No	No	No
PLEKHN1	No	No	No	No	Yes	No	No	No	No	No	No	No	No	No
PPL	No	No	No	No	Yes	No	No	No	No	No	No	No	No	No
PRSS22	No	No	No	No	Yes	No	No	No	No	No	No	No	Yes	No
PRSS27	No	No	No	No	Yes	No	No	No	No	No	No	No	No	No
PTK6	No	No	No	No	Yes	No	No	No	No	No	No	No	No	No
QRFP	No	No	No	No	Yes	No	No	No	No	No	No	No	No	No
RAB25	No	No	No	No	Yes	No	No	No	No	No	No	No	No	No
RAB40A	No	No	No	No	Yes	No	No	No	No	No	No	No	No	No
RAET1E	No	No	No	No	Yes	No	No	No	No	No	No	No	No	No
RAET1L	No	No	No	No	Yes	No	No	No	No	No	No	No	No	No
RHCG	No	No	No	No	Yes	No	No	No	No	No	No	No	No	No
RHOV	No	No	No	No	Yes	No	No	No	No	No	No	No	No	No
RIPK4	No	No	No	No	Yes	No	No	No	No	No	No	No	No	No
RNoSE7	No	No	No	No	Yes	No	No	No	No	No	No	No	No	No
RNF222	No	No	No	No	Yes	No	No	No	No	No	No	No	No	No
RNF223	No	No	No	No	Yes	No	No	No	No	No	No	No	Yes	No
S100A14	No	No	No	No	Yes	No	No	No	No	No	No	No	No	No
S100A16	No	No	No	No	Yes	No	No	No	No	No	No	No	No	No
S100A2	No	No	No	No	Yes	No	No	No	No	No	No	No	No	No
S100A8	No	No	No	No	Yes	No	No	No	No	No	No	No	No	No
S100A9	No	No	No	No	Yes	No	No	No	No	No	No	No	No	No
SAMD9	No	No	No	No	Yes	No	No	No	No	No	No	No	No	No
SBSN	No	No	No	No	Yes	No	No	No	No	No	No	No	No	No
SCEL	No	No	No	No	Yes	No	No	No	No	No	No	No	No	No
SDC1	No	No	No	No	Yes	No	No	No	No	No	No	No	No	No
SDR9C7	No	No	No	No	Yes	No	No	No	No	No	No	No	No	No
SERPINB13	No	No	No	No	Yes	No	No	No	No	No	No	No	No	No
SERPINB2	No	No	No	No	Yes	No	No	No	No	No	Yes	No	No	No
SERPINB3	No	No	No	No	Yes	No	No	No	No	No	No	No	No	No
SERPINB4	No	No	No	No	Yes	No	No	No	No	No	No	No	No	No
SERPINB5	No	No	No	No	Yes	No	No	No	No	No	No	No	No	No
SFN	No	No	No	No	Yes	No	No	No	No	No	No	No	No	No
SIM2	No	No	No	No	Yes	No	No	No	No	No	No	No	No	No
SLC10A6	No	No	No	No	Yes	No	No	No	No	No	No	No	No	No
SLC39A2	No	No	No	No	Yes	No	No	No	No	No	No	No	No	No
SLURP1	No	No	No	No	Yes	No	No	No	No	No	No	No	No	No
SOX21	No	No	No	No	Yes	No	No	No	No	No	No	No	Yes	No
SPAG17	No	No	No	No	Yes	No	No	No	No	No	No	No	No	No
SPINK5	No	No	No	No	Yes	No	No	No	No	No	No	No	No	No
SPINK7	No	No	No	No	Yes	No	No	No	No	No	No	No	No	No
SPNS2	No	No	No	No	Yes	No	No	No	No	No	No	No	No	No
SPRR1A	No	No	No	No	Yes	No	No	No	No	No	No	No	No	No
SPRR1B	No	No	No	No	Yes	No	No	No	No	No	No	No	No	No
SPRR2A	No	No	No	No	Yes	No	No	No	No	No	No	No	No	No
SPRR2B	No	No	No	No	Yes	No	No	No	No	No	No	No	No	No
SPRR2D	No	No	No	No	Yes	No	No	No	No	No	No	No	No	No
SPRR2E	No	No	No	No	Yes	No	No	No	No	No	No	No	No	No
SPRR2F	No	No	No	No	Yes	No	No	No	Yes	No	No	No	No	No
SPRR3	No	No	No	No	Yes	No	No	No	No	No	No	No	No	No
SULT2B1	No	No	No	No	Yes	No	No	No	No	No	No	No	No	No
SUSD4	No	No	No	No	Yes	No	No	No	Yes	No	No	No	No	No
TACSTD2	No	No	No	No	Yes	No	No	No	No	No	No	No	No	No
TGM1	No	No	No	No	Yes	No	No	No	No	No	No	No	No	No
TGM3	No	No	No	No	Yes	No	No	No	No	No	No	No	No	No
TGM5	No	No	No	No	Yes	No	No	No	No	No	No	No	No	No
TMEM154	No	No	No	No	Yes	No	No	No	No	No	No	No	No	No
TMEM40	No	No	No	No	Yes	No	No	No	No	No	Yes	No	No	No
TMEM79	No	No	No	No	Yes	No	No	No	No	No	No	No	No	No
TMPRSS11A	No	No	No	No	Yes	No	No	No	No	No	No	No	No	No
TMPRSS11B	No	No	No	No	Yes	No	No	No	No	No	No	No	No	No
TMPRSS11D	No	No	No	No	Yes	No	No	No	No	No	No	No	No	No
TMPRSS11E	No	No	No	No	Yes	No	No	No	No	No	No	No	No	No
TMPRSS11F	No	No	No	No	Yes	No	No	No	No	No	No	No	No	No
TP53AIP1	No	No	No	No	Yes	No	No	No	No	No	No	No	No	No
TP63	No	No	No	No	Yes	No	No	No	No	No	No	No	No	No
TPRG1	No	No	No	No	Yes	No	No	No	No	No	No	No	No	No
TRIM29	No	No	No	No	Yes	No	No	No	No	No	No	No	No	No
UGT1A7	No	No	No	No	Yes	No	No	No	No	No	No	No	No	No
UPK1A	No	No	No	No	Yes	No	No	No	No	No	No	No	No	No
UPK3B	No	No	No	No	Yes	No	No	Yes	No	No	No	No	No	No
UPP1	No	No	No	No	Yes	No	No	No	No	No	No	No	No	No
USH1G	No	No	No	No	Yes	No	No	No	No	No	No	No	No	No
VSIG10L	No	No	No	No	Yes	No	No	No	No	No	No	No	No	No
ZNF185	No	No	No	No	Yes	No	No	No	No	No	No	No	No	No
ZNF750	No	No	No	No	Yes	No	No	No	No	No	No	No	No	No
ABRA	No	No	No	No	No	Yes	No	No	No	No	No	No	No	No
ACTC1	No	No	No	No	No	Yes	No	No	No	No	No	No	No	No
ACTN2	No	No	No	No	No	Yes	No	No	No	No	No	No	No	No
ADCY5	No	No	No	No	No	Yes	No	No	No	No	No	No	No	No
ADHFE1	No	No	No	No	No	Yes	Yes	No	No	No	No	No	No	No
ADPRHL1	No	No	No	No	No	Yes	No	No	No	No	No	No	No	No
AKAP6	No	No	No	No	No	Yes	No	No	No	No	No	No	No	No
ALPK2	No	No	No	No	No	Yes	No	No	No	No	No	No	No	No
ALPK3	No	No	No	No	No	Yes	No	No	No	No	No	No	No	No
ANKRD1	No	No	No	No	No	Yes	No	No	No	No	No	No	No	No
ANKRD2	No	No	No	No	No	Yes	No	No	No	No	No	No	No	No
APOBEC2	No	No	No	No	No	Yes	No	No	No	No	No	No	No	No
ASB11	No	No	No	No	No	Yes	No	No	No	No	No	No	No	No
ASB15	No	No	No	No	No	Yes	No	No	No	No	No	No	No	No
ASB18	No	No	No	No	No	Yes	No	No	No	No	No	No	No	No
ATP1A3	No	No	No	No	No	Yes	No	No	No	No	No	No	No	No
BCO2	No	No	No	No	No	Yes	Yes	No	No	No	No	No	No	No
BMP10	No	No	No	No	No	Yes	No	No	No	No	No	No	No	No
CAMK2B	No	No	No	No	No	Yes	No	No	No	No	No	No	No	No
CASQ2	No	No	No	No	No	Yes	No	No	No	No	No	No	No	No
CAV3	No	No	No	No	No	Yes	No	No	No	No	No	No	No	No
CCDC141	No	No	No	No	No	Yes	No	No	No	No	No	No	No	No
CHRM2	No	No	No	No	No	Yes	No	No	No	No	No	No	No	No
CHRNE	No	No	No	No	No	Yes	No	No	No	No	No	No	No	No
CKMT2	No	No	No	No	No	Yes	No	No	No	No	No	No	No	No
CMYA5	No	No	No	No	No	Yes	No	No	No	No	No	No	No	No
CORIN	No	No	No	No	No	Yes	No	No	No	No	No	No	No	No
COX6A2	No	No	No	No	No	Yes	No	No	No	No	No	No	No	No
COX7A1	No	No	No	No	No	Yes	No	No	No	No	No	No	No	No
CRIP2	No	No	No	No	No	Yes	No	No	No	No	No	No	No	No
CRIP3	No	No	No	No	No	Yes	No	No	No	No	No	No	No	No
CRYAB	No	No	No	No	No	Yes	No	No	No	No	No	No	No	No
CRYM	No	No	No	No	No	Yes	No	No	No	No	No	No	No	No
CSRP3	No	No	No	No	No	Yes	No	No	No	No	No	No	No	No
CTAG2	No	No	No	No	No	Yes	No	No	No	No	Yes	No	No	No
CTNNo3	No	No	No	No	No	Yes	No	No	No	No	No	No	No	No
DAND5	No	No	No	No	No	Yes	No	No	No	No	No	No	No	No
DES	No	No	No	No	No	Yes	No	No	No	No	No	No	No	No
DHRS7C	No	No	No	No	No	Yes	No	No	No	No	No	No	No	No
DIRAS1	No	No	No	No	No	Yes	No	No	No	No	No	No	No	No
DKK3	No	No	No	No	No	Yes	No	No	No	No	No	No	No	No
DOK7	No	No	No	No	No	Yes	No	No	No	No	No	No	No	No
DUSP27	No	No	No	No	No	Yes	No	No	No	No	No	No	No	No
EEF1A2	No	No	No	No	No	Yes	No	No	No	No	No	No	No	No
ENoM	No	No	No	No	No	Yes	No	No	No	No	No	No	No	No
ESRRB	No	No	No	No	No	Yes	No	No	No	No	No	No	Yes	No
FABP3	No	No	No	No	No	Yes	No	No	No	No	No	No	No	No
FAM155B	No	No	No	No	No	Yes	No	No	No	No	No	No	No	Yes
FBXO40	No	No	No	No	No	Yes	No	No	No	No	No	No	No	No
FGF18	No	No	No	No	No	Yes	No	No	No	No	No	No	No	No
FHOD3	No	No	No	No	No	Yes	No	No	No	No	No	No	No	No
FILIP1	No	No	No	No	No	Yes	No	No	No	No	No	No	No	No
FITM1	No	No	No	No	No	Yes	No	No	No	No	No	No	No	No
FITM2	No	No	No	No	No	Yes	No	No	No	No	No	No	No	No
FRMD3	No	No	No	No	No	Yes	No	No	No	No	No	No	No	No
FRMD5	No	No	No	No	No	Yes	No	No	No	No	No	No	No	No
FSD2	No	No	No	No	No	Yes	No	No	No	No	No	No	No	No
GJA3	No	No	No	No	No	Yes	No	No	No	No	Yes	No	No	No
GLP1R	No	No	No	No	No	Yes	No	No	No	No	No	No	No	No
GRM1	No	No	No	No	No	Yes	No	No	No	No	No	No	No	No
GSG1L	No	No	No	No	No	Yes	No	No	No	No	No	No	No	No
GUCA1C	No	No	No	No	No	Yes	No	No	No	Yes	No	No	Yes	No
HCN4	No	No	No	No	No	Yes	No	No	No	No	No	No	No	No
HFE2	No	No	No	No	No	Yes	Yes	No	No	No	No	No	No	No
HHATL	No	No	No	No	No	Yes	No	No	No	No	No	No	No	No
HRC	No	No	No	No	No	Yes	No	No	No	No	No	No	No	No
HSPB3	No	No	No	No	No	Yes	No	No	No	No	No	No	No	No
HSPB7	No	No	No	No	No	Yes	No	No	No	No	No	No	No	No
ITGB1BP2	No	No	No	No	No	Yes	No	No	No	No	No	No	No	No
KBTBD12	No	No	No	No	No	Yes	No	No	No	No	No	No	No	No
KCNo5	No	No	No	No	No	Yes	No	No	No	No	No	No	No	No
KCNJ3	No	No	No	No	No	Yes	No	No	No	No	No	No	No	No
KCNJ4	No	No	No	No	No	Yes	No	No	No	No	No	No	No	No
KLHL31	No	No	No	No	No	Yes	No	No	No	No	No	No	No	No
KLHL38	No	No	No	No	No	Yes	No	No	No	No	No	No	No	No
LDB3	No	No	No	No	No	Yes	No	No	No	No	No	No	No	No
LMOD2	No	No	No	No	No	Yes	No	No	No	No	No	No	No	No
LMOD3	No	No	No	No	No	Yes	No	No	No	No	No	No	No	No
LRRC10	No	No	No	No	No	Yes	No	No	No	No	No	No	No	No
LRRC39	No	No	No	No	No	Yes	No	No	No	No	No	No	No	No
LRRC49	No	No	No	No	No	Yes	No	No	No	No	No	No	No	No
LSMEM2	No	No	No	No	No	Yes	No	No	No	No	No	No	No	No
MB	No	No	No	No	No	Yes	No	No	No	No	No	No	No	No
METTL11B	No	No	No	No	No	Yes	No	No	No	No	No	No	No	No
MLIP	No	No	No	No	No	Yes	Yes	No	No	No	No	No	No	No
MT1HL1	No	No	No	No	No	Yes	No	No	No	No	No	No	No	No
MTUS2	No	No	No	No	No	Yes	No	No	Yes	No	No	No	No	No
MYBPC3	No	No	No	No	No	Yes	No	No	No	No	No	No	No	No
MYBPHL	No	No	No	No	No	Yes	No	No	No	No	No	No	No	No
MYH6	No	No	No	No	No	Yes	No	No	No	No	No	No	No	No
MYH7	No	No	No	No	No	Yes	No	No	No	No	No	No	No	No
MYH7B	No	No	No	No	No	Yes	No	No	No	No	No	No	No	No
MYL2	No	No	No	No	No	Yes	No	No	No	No	No	No	No	No
MYL3	No	No	No	No	No	Yes	No	No	No	No	No	No	No	No
MYL4	No	No	No	No	No	Yes	No	No	No	No	No	No	No	No
MYL7	No	No	No	No	No	Yes	No	No	No	No	No	No	No	No
MYLK3	No	No	No	No	No	Yes	No	No	No	No	No	No	No	No
MYO18B	No	No	No	No	No	Yes	No	No	No	No	No	No	No	No
MYOM1	No	No	No	No	No	Yes	No	No	No	No	No	No	No	No
MYOM2	No	No	No	No	No	Yes	No	No	No	No	No	No	No	No
MYOM3	No	No	No	No	No	Yes	No	No	No	No	No	No	No	No
MYOZ2	No	No	No	No	No	Yes	No	No	No	No	No	No	No	No
MYPN	No	No	No	No	No	Yes	No	No	No	No	No	No	No	No
2023-11-02	No	No	No	No	No	Yes	No	No	No	No	No	No	No	No
NEBL	No	No	No	No	No	Yes	No	No	No	No	No	No	No	Yes
NEXN	No	No	No	No	No	Yes	No	No	No	No	No	No	No	No
NKX2-5	No	No	No	No	No	Yes	No	No	No	No	No	Yes	No	No
NMRK2	No	No	No	No	No	Yes	No	No	No	No	No	No	No	No
NPPA	No	No	No	No	No	Yes	No	No	No	No	No	No	No	No
NPPB	No	No	No	No	No	Yes	No	No	No	No	No	No	No	No
NRAP	No	No	No	No	No	Yes	No	No	No	No	No	No	No	No
NT5C1A	No	No	No	No	No	Yes	No	No	No	No	No	No	No	No
OXCT1	No	No	No	No	No	Yes	No	No	No	No	No	No	No	No
P2RX3	No	No	No	No	No	Yes	No	No	No	No	No	No	No	No
PDE1C	No	No	No	No	No	Yes	No	No	No	No	No	No	No	No
PEBP4	No	No	No	No	No	Yes	No	Yes	No	No	No	No	No	Yes
PGAM2	No	No	No	No	No	Yes	No	No	No	No	No	No	No	No
PGPEP1L	No	No	No	No	No	Yes	No	No	No	No	No	No	No	No
PKP2	No	No	No	No	No	Yes	No	No	No	No	No	No	No	No
PLA2G5	No	No	No	No	No	Yes	No	No	No	No	No	No	No	No
PLCXD3	No	No	No	No	No	Yes	No	No	Yes	No	No	No	No	No
PLN	No	No	No	No	No	Yes	No	No	No	No	No	No	No	No
POPDC2	No	No	No	No	No	Yes	No	No	No	No	No	No	No	No
POPDC3	No	No	No	No	No	Yes	No	No	No	No	No	No	No	No
PPFIA4	No	No	No	No	No	Yes	No	No	No	No	No	No	No	No
PPP1R1C	No	No	No	No	No	Yes	No	No	No	No	No	No	No	No
PPP1R3A	No	No	No	No	No	Yes	No	No	No	No	No	No	No	No
PRKAA2	No	No	No	No	No	Yes	No	No	No	No	No	No	No	No
PRSS42	No	No	No	No	No	Yes	No	No	No	No	No	No	No	Yes
PTP4A3	No	No	No	No	No	Yes	No	No	No	No	No	No	No	No
PXDNL	No	No	No	No	No	Yes	No	No	No	No	No	No	No	No
RBM20	No	No	No	No	No	Yes	No	No	No	No	No	No	No	No
RBM24	No	No	No	No	No	Yes	No	No	No	No	No	No	No	No
RBPMS2	No	No	No	No	No	Yes	No	No	No	No	No	No	No	No
RCAN2	No	No	No	No	No	Yes	No	No	No	No	No	No	No	No
RNF207	No	No	No	No	No	Yes	No	No	No	No	No	No	No	No
RRAD	No	No	No	No	No	Yes	No	No	No	No	No	No	No	No
RYR2	No	No	No	No	No	Yes	No	No	No	No	No	No	No	No
S100A1	No	No	No	No	No	Yes	No	No	No	No	No	No	No	No
SBK2	No	No	No	No	No	Yes	No	No	No	No	No	No	No	No
SBK3	No	No	No	No	No	Yes	No	No	No	No	No	No	No	No
SCHIP1	No	No	No	No	No	Yes	No	No	No	No	No	No	No	No
SCN2B	No	No	No	No	No	Yes	No	No	No	No	No	No	No	No
SCN5A	No	No	No	No	No	Yes	No	No	No	No	No	No	No	No
SGCA	No	No	No	No	No	Yes	No	No	No	No	No	No	No	No
SGCG	No	No	No	No	No	Yes	No	No	No	No	No	No	No	No
SH3BGR	No	No	No	No	No	Yes	No	No	No	No	No	No	No	No
SLC25A4	No	No	No	No	No	Yes	No	No	No	No	No	No	No	No
SLC2A4	No	No	No	No	No	Yes	No	No	No	No	No	No	No	No
SLC41A1	No	No	No	No	No	Yes	No	No	No	No	No	No	No	No
SLC4A3	No	No	No	No	No	Yes	No	No	Yes	No	No	No	No	No
SLC8A1	No	No	No	No	No	Yes	No	No	No	No	No	No	No	No
SMCO1	No	No	No	No	No	Yes	No	No	No	No	No	No	No	No
SMPX	No	No	No	No	No	Yes	No	No	No	No	No	No	No	No
SMYD1	No	No	No	No	No	Yes	No	No	No	No	No	No	No	No
SORBS2	No	No	No	No	No	Yes	No	No	No	No	No	No	No	Yes
SPHKAP	No	No	No	No	No	Yes	No	No	No	No	No	No	No	No
SPTB	No	No	No	No	No	Yes	No	No	No	No	Yes	No	No	No
SRL	No	No	No	No	No	Yes	No	No	No	No	No	No	No	No
SRPK3	No	No	No	No	No	Yes	No	No	No	No	No	No	No	No
ST8SIA2	No	No	No	No	No	Yes	No	No	No	No	No	No	No	No
SYNPO2L	No	No	No	No	No	Yes	No	No	No	No	No	No	No	No
TBX20	No	No	No	No	No	Yes	No	No	No	No	No	No	No	No
TBX5	No	No	No	No	No	Yes	No	Yes	No	No	Yes	No	No	No
TCAP	No	No	No	No	No	Yes	No	No	No	No	No	No	No	No
TECRL	No	No	No	No	No	Yes	No	No	No	No	No	No	No	No
TENM2	No	No	No	No	No	Yes	No	No	No	No	No	No	No	No
TMEM182	No	No	No	No	No	Yes	No	No	No	No	No	No	No	No
TNNC1	No	No	No	No	No	Yes	No	No	No	No	No	No	No	No
TNNI3	No	No	No	No	No	Yes	No	No	No	No	No	No	No	No
TNNI3K	No	No	No	No	No	Yes	No	No	No	No	No	No	No	No
TNNT2	No	No	No	No	No	Yes	No	No	No	No	No	No	No	No
TRDN	No	No	No	No	No	Yes	No	No	No	No	No	No	No	No
TRIM54	No	No	No	No	No	Yes	No	No	No	No	No	No	No	No
TRIM55	No	No	No	No	No	Yes	Yes	No	No	No	No	No	No	No
TRIM63	No	No	No	No	No	Yes	No	No	No	No	No	No	No	No
TUBA8	No	No	No	No	No	Yes	No	No	No	No	No	No	No	No
TXLNB	No	No	No	No	No	Yes	No	No	No	No	No	No	No	No
TYRP1	No	No	No	No	No	Yes	No	No	No	No	No	No	No	No
UNC45B	No	No	No	No	No	Yes	No	No	No	No	No	No	No	No
VWC2	No	No	No	No	No	Yes	No	No	Yes	No	No	No	No	No
XIRP1	No	No	No	No	No	Yes	No	No	No	No	No	No	No	No
XIRP2	No	No	No	No	No	Yes	No	No	No	No	No	No	No	No
A1BG	No	No	No	No	No	No	Yes	No	No	No	No	No	No	No
A1CF	No	No	No	No	No	No	Yes	No	No	No	No	No	No	No
AADAT	No	No	No	No	No	No	Yes	No	No	No	No	No	No	No
ABAT	No	No	No	No	No	No	Yes	No	No	No	No	No	No	No
ABCB11	No	No	No	No	No	No	Yes	No	No	No	No	No	No	No
ABCB4	No	No	No	No	No	No	Yes	No	No	No	No	No	No	No
ABCC2	No	No	No	No	No	No	Yes	No	No	No	No	No	No	No
ABCC6	No	No	No	No	No	No	Yes	No	No	No	No	No	No	No
ABCG5	No	No	No	No	No	No	Yes	No	No	No	No	No	No	No
ABCG8	No	No	No	No	No	No	Yes	No	No	No	No	No	No	No
ACMSD	No	No	No	No	No	No	Yes	No	No	No	No	No	No	No
ACOT12	No	No	No	No	No	No	Yes	No	No	No	No	No	No	No
ACOX2	No	No	No	No	No	No	Yes	No	No	No	No	No	No	No
ACSM2A	No	No	No	No	No	No	Yes	No	No	No	No	No	No	No
ACSM2B	No	No	No	No	No	No	Yes	No	No	No	No	No	No	No
ACSM3	No	No	No	No	No	No	Yes	No	No	No	No	No	No	No
ACSM5	No	No	No	No	No	No	Yes	No	No	No	No	No	No	No
ACY1	No	No	No	No	No	No	Yes	No	No	No	No	No	No	No
ADH1A	No	No	No	No	No	No	Yes	No	No	No	No	No	No	No
ADH4	No	No	No	No	No	No	Yes	No	No	No	No	No	No	No
ADH6	No	No	No	No	No	No	Yes	No	No	No	No	No	No	No
AFM	No	No	No	No	No	No	Yes	No	No	No	No	No	No	No
AFP	No	No	No	No	No	No	Yes	No	No	No	No	No	No	No
AGMO	No	No	No	No	No	No	Yes	No	No	No	No	No	No	No
AGT	No	No	No	No	No	No	Yes	No	No	No	No	No	No	No
AGXT	No	No	No	No	No	No	Yes	No	No	No	No	No	No	No
AGXT2	No	No	No	No	No	No	Yes	No	No	No	No	No	No	No
AHSG	No	No	No	No	No	No	Yes	No	No	No	No	No	No	No
AKR1C4	No	No	No	No	No	No	Yes	No	No	No	No	No	No	No
AKR1D1	No	No	No	No	No	No	Yes	No	No	No	No	No	No	No
AKR7A3	No	No	No	No	No	No	Yes	No	No	No	No	No	Yes	No
ALB	No	No	No	No	No	No	Yes	No	No	No	No	No	No	No
ALDH1L1	No	No	No	No	No	No	Yes	No	No	No	No	No	No	No
ALDH4A1	No	No	No	No	No	No	Yes	No	No	No	No	No	No	No
ALDH8A1	No	No	No	No	No	No	Yes	No	No	No	No	No	No	No
ALDOB	No	No	No	No	No	No	Yes	No	No	No	No	No	No	No
AMBP	No	No	No	No	No	No	Yes	No	No	No	No	No	No	No
ANG	No	No	No	No	No	No	Yes	No	No	No	No	No	No	No
ANGPTL3	No	No	No	No	No	No	Yes	No	No	No	No	No	No	No
ANGPTL6	No	No	No	No	No	No	Yes	No	No	No	No	No	No	No
APCS	No	No	No	No	No	No	Yes	No	No	No	No	No	No	No
APOA1	No	No	No	No	No	No	Yes	No	No	No	No	No	No	No
APOA2	No	No	No	No	No	No	Yes	No	No	No	No	No	No	No
APOA5	No	No	No	No	No	No	Yes	No	No	No	No	No	No	No
APOB	No	No	No	No	No	No	Yes	No	No	No	No	No	No	No
APOC1	No	No	No	No	No	No	Yes	No	No	No	No	No	No	No
APOC2	No	No	No	No	No	No	Yes	No	No	No	No	No	No	No
APOC3	No	No	No	No	No	No	Yes	No	No	No	No	No	No	No
APOC4	No	No	No	No	No	No	Yes	No	No	No	No	No	No	No
APOC4-APOC2	No	No	No	No	No	No	Yes	No	No	No	No	No	No	No
APOF	No	No	No	No	No	No	Yes	No	No	No	No	No	No	No
APOH	No	No	No	No	No	No	Yes	No	No	No	No	No	No	No
AQP9	No	No	No	No	No	No	Yes	No	No	No	No	No	No	No
ARG1	No	No	No	No	No	No	Yes	No	No	No	No	No	No	No
ARID3C	No	No	No	No	No	No	Yes	No	No	No	No	No	No	No
ARSE	No	No	No	No	No	No	Yes	No	No	No	No	No	No	No
ART4	No	No	No	No	No	No	Yes	No	No	No	No	Yes	No	No
ASCL1	No	No	No	No	No	No	Yes	No	No	No	No	No	No	No
ASGR1	No	No	No	No	No	No	Yes	No	No	No	No	No	No	No
ASGR2	No	No	No	No	No	No	Yes	No	No	No	No	No	No	No
ASPDH	No	No	No	No	No	No	Yes	No	No	No	No	No	No	No
ASPG	No	No	No	No	No	No	Yes	No	No	No	No	No	No	No
ASS1	No	No	No	No	No	No	Yes	No	No	No	No	No	No	No
ATF5	No	No	No	No	No	No	Yes	No	No	No	No	No	No	Yes
BAAT	No	No	No	No	No	No	Yes	No	No	No	No	No	No	No
BCHE	No	No	No	No	No	No	Yes	No	No	No	No	No	No	No
BDH1	No	No	No	No	No	No	Yes	No	No	No	No	No	No	No
BHMT	No	No	No	No	No	No	Yes	No	No	No	No	No	No	No
BHMT2	No	No	No	No	No	No	Yes	No	No	No	No	No	No	No
C2	No	No	No	No	No	No	Yes	Yes	No	No	No	No	No	No
C4A	No	No	No	No	No	No	Yes	No	No	No	No	No	No	No
C4BPA	No	No	No	No	No	No	Yes	Yes	No	No	No	No	No	No
C4BPB	No	No	No	No	No	No	Yes	No	Yes	No	No	No	No	No
C5	No	No	No	No	No	No	Yes	No	No	No	No	No	No	No
C6	No	No	No	No	No	No	Yes	No	No	No	No	No	No	No
C8A	No	No	No	No	No	No	Yes	No	No	No	No	No	No	No
C8B	No	No	No	No	No	No	Yes	No	No	No	No	No	No	No
C8G	No	No	No	No	No	No	Yes	No	No	No	No	No	No	No
C9	No	No	No	No	No	No	Yes	No	No	No	No	No	No	No
CA5A	No	No	No	No	No	No	Yes	No	No	No	No	No	No	No
CBS	No	No	No	No	No	No	Yes	No	No	No	No	No	No	No
CCL16	No	No	No	No	No	No	Yes	No	No	No	No	No	No	No
CES1	No	No	No	No	No	No	Yes	Yes	No	No	No	No	No	No
CES5A	No	No	No	No	No	No	Yes	No	No	No	No	No	No	No
CFB	No	No	No	No	No	No	Yes	No	No	No	No	No	No	No
CFH	No	No	No	No	No	No	Yes	No	No	No	No	No	No	No
CFHR1	No	No	No	No	No	No	Yes	No	No	No	No	No	No	No
CFHR2	No	No	No	No	No	No	Yes	No	No	No	No	No	No	No
CFHR3	No	No	No	No	No	No	Yes	No	No	No	No	No	No	No
CFHR4	No	No	No	No	No	No	Yes	No	No	No	No	No	No	No
CFHR5	No	No	No	No	No	No	Yes	No	No	No	No	No	No	No
CFI	No	No	No	No	No	No	Yes	No	No	No	No	No	No	No
CHRNo4	No	No	No	No	No	No	Yes	No	No	No	No	Yes	No	No
CHST13	No	No	No	No	No	No	Yes	No	No	No	No	No	No	No
CLDN14	No	No	No	No	No	No	Yes	No	No	No	No	No	No	No
CLEC1B	No	No	No	No	No	No	Yes	No	No	No	No	No	No	No
CLEC4M	No	No	No	No	No	No	Yes	No	No	No	Yes	No	No	No
CNDP1	No	No	No	No	No	No	Yes	No	No	No	No	No	No	No
COLEC10	No	No	No	No	No	No	Yes	No	No	No	Yes	No	No	No
CP	No	No	No	No	No	No	Yes	No	No	No	No	No	No	No
CPB2	No	No	No	No	No	No	Yes	No	No	No	No	No	No	No
CPN1	No	No	No	No	No	No	Yes	No	No	No	No	No	No	No
CPN2	No	No	No	No	No	No	Yes	No	No	No	No	No	No	No
CPS1	No	No	No	No	No	No	Yes	No	No	No	No	No	No	No
CREB3L3	No	No	No	No	No	No	Yes	No	No	No	No	No	No	No
CRHBP	No	No	No	No	No	No	Yes	No	No	No	No	Yes	No	No
CRP	No	No	No	No	No	No	Yes	No	No	No	No	No	No	No
CUX2	No	No	No	No	No	No	Yes	No	No	No	No	No	No	No
CYP1A1	No	No	No	No	No	No	Yes	No	No	No	No	No	No	No
CYP1A2	No	No	No	No	No	No	Yes	No	No	No	No	No	No	No
CYP26A1	No	No	No	No	No	No	Yes	No	No	No	No	No	No	No
CYP27A1	No	No	No	No	No	No	Yes	No	No	No	No	No	No	No
CYP2A6	No	No	No	No	No	No	Yes	No	No	No	No	No	No	No
CYP2A7	No	No	No	No	No	No	Yes	No	No	No	No	No	No	No
CYP2B6	No	No	No	No	No	No	Yes	No	No	No	No	No	No	No
CYP2C19	No	No	No	No	No	No	Yes	No	No	No	No	No	No	No
CYP2C8	No	No	No	No	No	No	Yes	No	No	No	No	No	No	No
CYP2C9	No	No	No	No	No	No	Yes	No	No	No	No	No	No	No
CYP2D6	No	No	No	No	No	No	Yes	No	No	No	No	No	No	No
CYP2E1	No	No	No	No	No	No	Yes	No	No	No	No	No	No	No
CYP2J2	No	No	No	No	No	No	Yes	No	No	No	No	No	No	No
CYP39A1	No	No	No	No	No	No	Yes	No	No	No	No	No	No	No
CYP3A4	No	No	No	No	No	No	Yes	No	No	No	No	No	No	No
CYP3A43	No	No	No	No	No	No	Yes	No	No	No	No	No	No	No
CYP3A7	No	No	No	No	No	No	Yes	No	No	No	No	No	No	No
CYP4A11	No	No	No	No	No	No	Yes	No	No	No	No	No	No	No
CYP4A22	No	No	No	No	No	No	Yes	No	No	No	No	No	No	No
CYP4F11	No	No	No	No	No	No	Yes	No	No	No	No	No	No	No
CYP4F2	No	No	No	No	No	No	Yes	No	No	No	No	No	No	No
CYP4F3	No	No	No	No	No	No	Yes	No	No	No	No	No	No	No
CYP7A1	No	No	No	No	No	No	Yes	No	No	No	No	No	No	No
CYP8B1	No	No	No	No	No	No	Yes	No	No	No	No	No	No	No
DAO	No	No	No	No	No	No	Yes	No	No	No	No	No	No	No
DCXR	No	No	No	No	No	No	Yes	No	No	No	No	No	No	No
DEPDC7	No	No	No	No	No	No	Yes	No	No	No	No	No	No	No
DIO1	No	No	No	No	No	No	Yes	No	No	No	No	No	No	Yes
DMGDH	No	No	No	No	No	No	Yes	No	No	No	No	No	No	No
DNoJC25	No	No	No	No	No	No	Yes	No	No	No	No	No	No	No
DNMT3L	No	No	No	No	No	No	Yes	No	No	No	No	No	No	No
DPYS	No	No	No	No	No	No	Yes	No	No	No	No	No	No	No
ECHDC2	No	No	No	No	No	No	Yes	No	No	No	No	No	No	No
EHHADH	No	No	No	No	No	No	Yes	No	No	No	No	No	No	No
ELFN1	No	No	No	No	No	No	Yes	No	No	No	No	No	No	No
ELOVL2	No	No	No	No	No	No	Yes	No	No	No	Yes	No	No	No
ENTPD5	No	No	No	No	No	No	Yes	No	No	No	No	No	No	No
EPO	No	No	No	No	No	No	Yes	No	No	No	No	No	No	No
ETNK2	No	No	No	No	No	No	Yes	No	No	No	No	No	No	No
ETNPPL	No	No	No	No	No	No	Yes	No	No	No	No	No	No	No
EVA1A	No	No	No	No	No	No	Yes	No	No	No	No	No	No	No
F10	No	No	No	No	No	No	Yes	No	No	No	No	No	No	No
F11	No	No	No	No	No	No	Yes	No	No	No	No	No	No	No
F12	No	No	No	No	No	No	Yes	No	No	No	No	No	No	No
F13B	No	No	No	No	No	No	Yes	No	No	No	No	No	No	No
F2	No	No	No	No	No	No	Yes	No	No	No	No	No	No	No
F5	No	No	No	No	No	No	Yes	No	No	No	Yes	No	No	No
F7	No	No	No	No	No	No	Yes	No	No	No	No	No	No	No
F9	No	No	No	No	No	No	Yes	No	No	No	No	No	No	No
FBP1	No	No	No	No	No	No	Yes	No	No	No	No	No	No	No
FCN2	No	No	No	No	No	No	Yes	No	No	No	No	No	No	No
FCN3	No	No	No	No	No	No	Yes	Yes	No	No	No	No	No	No
FETUB	No	No	No	No	No	No	Yes	No	No	No	No	No	No	No
FGA	No	No	No	No	No	No	Yes	No	No	No	No	No	No	No
FGB	No	No	No	No	No	No	Yes	No	No	No	No	No	No	No
FGF21	No	No	No	No	No	No	Yes	No	No	No	No	No	No	No
FGG	No	No	No	No	No	No	Yes	No	No	No	No	No	No	No
FGL1	No	No	No	No	No	No	Yes	No	No	No	No	No	No	No
FMO3	No	No	No	No	No	No	Yes	No	No	No	No	No	No	No
FMO4	No	No	No	No	No	No	Yes	No	No	No	No	No	No	No
FMO5	No	No	No	No	No	No	Yes	No	No	No	No	No	No	No
FTCD	No	No	No	No	No	No	Yes	No	No	No	No	No	No	No
FUOM	No	No	No	No	No	No	Yes	No	No	No	No	No	No	No
G6PC	No	No	No	No	No	No	Yes	No	No	No	No	No	No	No
GAMT	No	No	No	No	No	No	Yes	No	No	No	No	No	No	No
GAS2	No	No	No	No	No	No	Yes	No	No	No	No	No	No	No
GATM	No	No	No	No	No	No	Yes	No	No	Yes	No	No	No	No
GBP7	No	No	No	No	No	No	Yes	No	No	No	No	No	No	No
GC	No	No	No	No	No	No	Yes	No	No	No	No	No	No	No
GCKR	No	No	No	No	No	No	Yes	No	No	No	No	No	No	No
GDF2	No	No	No	No	No	No	Yes	No	No	No	No	No	No	No
GJB1	No	No	No	No	No	No	Yes	No	No	No	No	No	No	No
GLDC	No	No	No	No	No	No	Yes	No	No	No	Yes	No	No	No
GLS2	No	No	No	No	No	No	Yes	No	No	No	No	No	No	No
GLTPD2	No	No	No	No	No	No	Yes	No	No	No	No	No	No	No
GLYAT	No	No	No	No	No	No	Yes	No	No	No	No	No	No	No
GLYATL1	No	No	No	No	No	No	Yes	No	No	No	No	No	No	No
GLYCTK	No	No	No	No	No	No	Yes	No	No	No	No	No	No	No
GNMT	No	No	No	No	No	No	Yes	No	No	Yes	No	No	No	No
GOLGA6B	No	No	No	No	No	No	Yes	No	No	No	No	No	No	No
GOLT1A	No	No	No	No	No	No	Yes	No	No	No	No	No	No	No
GPLD1	No	No	No	No	No	No	Yes	No	No	No	No	No	No	No
GRB14	No	No	No	No	No	No	Yes	No	No	No	No	No	No	No
GSTA2	No	No	No	No	No	No	Yes	No	No	No	No	No	No	No
GSTM1	No	No	No	No	No	No	Yes	No	No	No	No	No	No	No
GYS2	No	No	No	No	No	No	Yes	No	No	No	No	No	No	No
HAAO	No	No	No	No	No	No	Yes	No	No	No	No	No	No	No
HABP2	No	No	No	No	No	No	Yes	No	No	No	No	No	No	No
HAL	No	No	No	No	No	No	Yes	No	No	No	No	No	No	No
HAMP	No	No	No	No	No	No	Yes	No	No	No	No	No	No	No
HAO1	No	No	No	No	No	No	Yes	No	No	No	No	No	No	No
HAO2	No	No	No	No	No	No	Yes	No	No	No	No	No	No	No
HGD	No	No	No	No	No	No	Yes	No	No	No	No	No	No	No
HGFAC	No	No	No	No	No	No	Yes	No	No	No	No	No	No	No
HMGCS2	No	No	No	No	No	No	Yes	No	No	No	No	No	No	No
HOGA1	No	No	No	No	No	No	Yes	No	No	No	No	No	No	No
HP	No	No	No	No	No	No	Yes	No	No	No	No	No	No	No
HPD	No	No	No	No	No	No	Yes	No	No	No	No	No	No	No
HPN	No	No	No	No	No	No	Yes	No	No	No	No	No	No	No
HPR	No	No	No	No	No	No	Yes	No	No	No	No	No	No	No
HPX	No	No	No	No	No	No	Yes	No	No	No	No	No	No	No
HRG	No	No	No	No	No	No	Yes	No	No	No	No	No	No	No
HS3ST3B1	No	No	No	No	No	No	Yes	No	No	No	No	No	No	No
HSD11B1	No	No	No	No	No	No	Yes	No	No	No	Yes	No	No	No
HSD17B13	No	No	No	No	No	No	Yes	No	No	No	No	No	No	No
HSD17B6	No	No	No	No	No	No	Yes	No	No	No	No	No	No	No
HYAL1	No	No	No	No	No	No	Yes	No	No	No	No	Yes	No	No
IDO2	No	No	No	No	No	No	Yes	No	No	No	Yes	No	No	No
IGFALS	No	No	No	No	No	No	Yes	No	No	No	No	No	Yes	No
IGFBP1	No	No	No	No	No	No	Yes	No	No	No	Yes	No	No	No
IGSF23	No	No	No	No	No	No	Yes	No	No	No	No	No	No	No
IL1RAP	No	No	No	No	No	No	Yes	No	No	No	No	No	No	No
IL27	No	No	No	No	No	No	Yes	No	No	No	No	No	No	No
INHBC	No	No	No	No	No	No	Yes	No	No	No	No	No	No	No
INHBE	No	No	No	No	No	No	Yes	No	No	No	No	No	No	No
ITIH1	No	No	No	No	No	No	Yes	No	No	No	No	No	No	No
ITIH2	No	No	No	No	No	No	Yes	No	No	No	No	No	No	No
ITIH3	No	No	No	No	No	No	Yes	No	No	No	No	No	No	No
ITIH4	No	No	No	No	No	No	Yes	No	No	No	No	No	No	No
KDM8	No	No	No	No	No	No	Yes	No	No	No	No	No	No	No
KHK	No	No	No	No	No	No	Yes	No	No	No	No	No	No	No
KLKB1	No	No	No	No	No	No	Yes	No	No	No	No	No	No	No
KMO	No	No	No	No	No	No	Yes	No	No	No	No	No	No	No
KNG1	No	No	No	No	No	No	Yes	No	No	No	No	No	No	No
LEAP2	No	No	No	No	No	No	Yes	No	No	No	No	No	No	No
LECT2	No	No	No	No	No	No	Yes	No	No	No	No	No	No	No
LGSN	No	No	No	No	No	No	Yes	No	No	No	Yes	No	No	No
LIME1	No	No	No	No	No	No	Yes	No	No	No	No	No	Yes	No
LIPC	No	No	No	No	No	No	Yes	No	No	No	No	No	No	No
LPA	No	No	No	No	No	No	Yes	No	No	No	No	No	No	No
LRG1	No	No	No	No	No	No	Yes	No	No	No	No	No	No	No
MASP2	No	No	No	No	No	No	Yes	No	No	No	No	No	No	No
MAT1A	No	No	No	No	No	No	Yes	No	No	No	No	No	No	No
MBL2	No	No	No	No	No	No	Yes	No	No	No	No	No	No	No
METTL7B	No	No	No	No	No	No	Yes	No	No	No	No	No	No	No
MST1	No	No	No	No	No	No	Yes	No	No	No	No	No	No	No
MT1B	No	No	No	No	No	No	Yes	No	No	No	No	No	No	No
MTTP	No	No	No	No	No	No	Yes	No	No	No	No	No	No	No
MYO1B	No	No	No	No	No	No	Yes	No	No	No	No	No	No	No
NNMT	No	No	No	No	No	No	Yes	No	No	No	No	No	No	No
NPW	No	No	No	No	No	No	Yes	No	No	No	No	No	Yes	No
NR0B2	No	No	No	No	No	No	Yes	No	No	No	No	No	No	No
NR1H4	No	No	No	No	No	No	Yes	No	No	No	No	No	No	No
NR1I3	No	No	No	No	No	No	Yes	No	No	No	No	No	No	No
OGDHL	No	No	No	No	No	No	Yes	No	No	No	No	No	No	No
OIT3	No	No	No	No	No	No	Yes	No	No	No	No	No	No	No
ONECUT1	No	No	No	No	No	No	Yes	No	No	Yes	No	No	No	No
ORM1	No	No	No	No	No	No	Yes	No	No	No	No	No	No	No
ORM2	No	No	No	No	No	No	Yes	No	No	No	No	No	No	No
OSGIN1	No	No	No	No	No	No	Yes	No	No	No	No	No	No	No
OTC	No	No	No	No	No	No	Yes	No	No	No	No	No	No	No
OXT	No	No	No	No	No	No	Yes	No	No	No	No	No	No	No
PAH	No	No	No	No	No	No	Yes	No	No	No	No	No	No	No
PANK1	No	No	No	No	No	No	Yes	No	No	No	No	No	No	No
PAQR9	No	No	No	No	No	No	Yes	No	No	No	No	No	No	No
PCK1	No	No	No	No	No	No	Yes	No	No	No	No	No	No	No
PCK2	No	No	No	No	No	No	Yes	No	No	No	No	No	No	No
PCSK6	No	No	No	No	No	No	Yes	No	No	No	No	Yes	No	No
PCSK9	No	No	No	No	No	No	Yes	Yes	No	No	No	No	No	No
PGLYRP2	No	No	No	No	No	No	Yes	No	No	No	No	No	No	No
PIPOX	No	No	No	No	No	No	Yes	No	No	No	No	No	No	No
PKLR	No	No	No	No	No	No	Yes	No	No	No	No	No	No	No
PLA2G12B	No	No	No	No	No	No	Yes	No	No	No	No	No	No	No
PLG	No	No	No	No	No	No	Yes	No	No	No	No	No	No	No
PLGLB1	No	No	No	No	No	No	Yes	No	No	No	No	No	No	No
PLGLB2	No	No	No	No	No	No	Yes	No	No	No	No	No	No	No
PNPLA3	No	No	No	No	No	No	Yes	No	No	No	No	No	No	No
PON1	No	No	No	No	No	No	Yes	No	No	No	No	No	No	No
PON3	No	No	No	No	No	No	Yes	No	No	No	No	No	No	No
PRAMEF10	No	No	No	No	No	No	Yes	No	No	No	No	No	No	No
PRAP1	No	No	No	No	No	No	Yes	No	No	No	No	No	No	No
PRG4	No	No	No	No	No	No	Yes	No	No	No	No	No	No	No
PROC	No	No	No	No	No	No	Yes	No	No	No	No	No	No	No
PRODH2	No	No	No	No	No	No	Yes	No	No	No	No	No	No	No
PROS1	No	No	No	No	No	No	Yes	No	No	No	No	No	No	No
PROX1	No	No	No	No	No	No	Yes	No	No	No	No	No	No	No
PROZ	No	No	No	No	No	No	Yes	No	No	No	No	No	No	No
PSAT1	No	No	No	No	No	No	Yes	No	No	No	No	No	No	No
PZP	No	No	No	No	No	No	Yes	No	No	No	No	No	No	No
RBP4	No	No	No	No	No	No	Yes	No	No	No	No	No	No	No
RBP5	No	No	No	No	No	No	Yes	No	No	No	No	No	No	No
RDH16	No	No	No	No	No	No	Yes	No	No	No	No	No	No	No
RELN	No	No	No	No	No	No	Yes	No	No	No	No	No	No	No
RFPL4A	No	No	No	No	No	No	Yes	No	No	No	No	No	No	No
RIPPLY1	No	No	No	No	No	No	Yes	No	No	No	No	No	No	No
RNoSE4	No	No	No	No	No	No	Yes	No	No	No	No	No	No	No
RND1	No	No	No	No	No	No	Yes	No	No	No	No	No	No	No
RTP3	No	No	No	No	No	No	Yes	No	No	No	No	No	No	No
SAA4	No	No	No	No	No	No	Yes	No	No	No	No	No	No	No
SARDH	No	No	No	No	No	No	Yes	No	No	No	No	No	No	No
SDS	No	No	No	No	No	No	Yes	No	No	No	No	No	No	No
SEC14L2	No	No	No	No	No	No	Yes	No	No	No	No	No	No	No
SEC14L3	No	No	No	No	No	No	Yes	Yes	No	No	No	No	No	Yes
SEC14L4	No	No	No	No	No	No	Yes	Yes	No	No	No	No	No	No
SERPINo1	No	No	No	No	No	No	Yes	No	No	No	No	No	No	No
SERPINo10	No	No	No	No	No	No	Yes	No	No	No	No	No	No	No
SERPINo11	No	No	No	No	No	No	Yes	No	No	No	No	No	No	No
SERPINo3	No	No	No	No	No	No	Yes	No	No	No	No	No	No	No
SERPINo4	No	No	No	No	No	No	Yes	No	No	No	No	No	No	No
SERPINo6	No	No	No	No	No	No	Yes	No	No	No	No	No	No	No
SERPINo7	No	No	No	No	No	No	Yes	No	No	No	No	No	No	No
SERPINC1	No	No	No	No	No	No	Yes	No	No	No	No	No	No	No
SERPIND1	No	No	No	No	No	No	Yes	No	No	No	No	No	No	No
SERPINF2	No	No	No	No	No	No	Yes	No	No	No	No	No	No	No
SHBG	No	No	No	No	No	No	Yes	No	No	No	No	No	No	No
SLC10A1	No	No	No	No	No	No	Yes	No	No	No	No	No	No	No
SLC13A5	No	No	No	No	No	No	Yes	No	No	No	No	No	No	No
SLC16A13	No	No	No	No	No	No	Yes	No	No	No	No	No	No	No
SLC17A2	No	No	No	No	No	No	Yes	No	No	No	No	No	No	No
SLC22A1	No	No	No	No	No	No	Yes	No	No	No	No	No	No	No
SLC22A10	No	No	No	No	No	No	Yes	No	No	No	No	No	No	No
SLC22A25	No	No	No	No	No	No	Yes	No	No	No	No	No	No	No
SLC22A7	No	No	No	No	No	No	Yes	No	No	No	No	No	No	No
SLC22A9	No	No	No	No	No	No	Yes	No	No	No	No	No	No	No
SLC25A18	No	No	No	No	No	No	Yes	No	No	No	No	No	No	No
SLC25A47	No	No	No	No	No	No	Yes	No	No	No	No	No	No	No
SLC27A2	No	No	No	No	No	No	Yes	No	No	No	No	No	No	No
SLC27A5	No	No	No	No	No	No	Yes	No	No	No	No	No	No	No
SLC28A1	No	No	No	No	No	No	Yes	No	No	No	No	No	No	No
SLC2A2	No	No	No	No	No	No	Yes	No	No	No	No	No	No	No
SLC30A10	No	No	No	No	No	No	Yes	No	No	No	No	No	No	No
SLC38A4	No	No	No	No	No	No	Yes	No	No	No	No	No	No	No
SLC51A	No	No	No	No	No	No	Yes	No	No	No	No	No	No	No
SLC6A1	No	No	No	No	No	No	Yes	No	No	No	No	No	No	No
SLC6A12	No	No	No	No	No	No	Yes	No	No	No	No	No	No	No
SLCO1B1	No	No	No	No	No	No	Yes	No	No	No	No	No	No	No
SLCO1B3	No	No	No	No	No	No	Yes	No	No	No	No	No	No	No
SMLR1	No	No	No	No	No	No	Yes	No	No	No	No	No	No	No
SPDYC	No	No	No	No	No	No	Yes	No	No	No	No	No	No	No
SPP2	No	No	No	No	No	No	Yes	No	No	No	No	No	No	No
STEAP3	No	No	No	No	No	No	Yes	No	No	No	No	No	No	No
SULT1E1	No	No	No	No	No	No	Yes	No	No	No	No	No	No	No
TAT	No	No	No	No	No	No	Yes	No	No	No	No	No	No	No
TDO2	No	No	No	No	No	No	Yes	No	No	No	No	No	No	No
TF	No	No	No	No	No	No	Yes	No	No	No	No	No	No	No
TFR2	No	No	No	No	No	No	Yes	No	No	No	No	No	No	No
THPO	No	No	No	No	No	No	Yes	No	No	No	No	No	No	No
TM4SF4	No	No	No	No	No	No	Yes	No	No	No	No	No	No	No
TMEM56	No	No	No	No	No	No	Yes	No	No	No	No	No	No	No
TMPRSS6	No	No	No	No	No	No	Yes	No	No	No	No	No	No	No
TTPA	No	No	No	No	No	No	Yes	No	No	No	No	No	No	No
TTR	No	No	No	No	No	No	Yes	No	No	No	No	No	No	No
UGT1A1	No	No	No	No	No	No	Yes	No	No	No	No	No	No	No
UGT1A3	No	No	No	No	No	No	Yes	No	No	No	No	No	No	No
UGT1A4	No	No	No	No	No	No	Yes	No	No	No	No	No	No	No
UGT1A6	No	No	No	No	No	No	Yes	No	No	No	No	No	No	No
UGT1A9	No	No	No	No	No	No	Yes	No	No	No	No	No	No	No
UGT2A1	No	No	No	No	No	No	Yes	No	No	No	No	No	No	No
UGT2B10	No	No	No	No	No	No	Yes	No	No	No	No	No	No	No
UGT2B15	No	No	No	No	No	No	Yes	No	No	No	No	No	No	No
UGT2B4	No	No	No	No	No	No	Yes	No	No	No	No	No	No	No
UGT2B7	No	No	No	No	No	No	Yes	No	No	No	No	No	No	No
UGT3A1	No	No	No	No	No	No	Yes	No	No	No	No	No	No	No
UPB1	No	No	No	No	No	No	Yes	No	No	No	No	No	No	No
UPP2	No	No	No	No	No	No	Yes	No	No	No	No	No	No	No
UROC1	No	No	No	No	No	No	Yes	No	No	No	No	No	No	No
USH2A	No	No	No	No	No	No	Yes	No	No	No	No	No	No	No
VNN1	No	No	No	No	No	No	Yes	No	No	No	No	No	No	No
VNN3	No	No	No	No	No	No	Yes	No	No	No	No	No	No	No
XYLB	No	No	No	No	No	No	Yes	No	No	No	No	No	No	No
ABCA3	No	No	No	No	No	No	No	Yes	No	No	No	No	No	No
ACOXL	No	No	No	No	No	No	No	Yes	No	No	No	No	No	No
ACP5	No	No	No	No	No	No	No	Yes	No	No	No	No	No	No
ADAMTS8	No	No	No	No	No	No	No	Yes	No	No	No	No	No	No
AGBL1	No	No	No	No	No	No	No	Yes	No	No	No	No	No	No
AGER	No	No	No	No	No	No	No	Yes	No	No	No	No	No	No
AGTR2	No	No	No	No	No	No	No	Yes	No	No	No	No	No	No
ALDH3B1	No	No	No	No	No	No	No	Yes	No	No	No	No	No	No
ALOX15	No	No	No	No	No	No	No	Yes	No	No	No	No	No	No
ALOX5	No	No	No	No	No	No	No	Yes	No	No	No	No	No	No
ALPL	No	No	No	No	No	No	No	Yes	No	No	No	No	No	No
AQP4	No	No	No	No	No	No	No	Yes	No	No	No	No	No	No
ATP13A4	No	No	No	No	No	No	No	Yes	No	No	No	No	No	Yes
BPIFA1	No	No	No	No	No	No	No	Yes	No	No	No	No	No	No
C16ORF89	No	No	No	No	No	No	No	Yes	No	No	No	No	No	Yes
C5ORF38	No	No	No	No	No	No	No	Yes	No	No	No	No	No	No
CACNo2D2	No	No	No	No	No	No	No	Yes	No	No	No	No	No	No
CALCRL	No	No	No	No	No	No	No	Yes	No	No	No	No	No	No
CASS4	No	No	No	No	No	No	No	Yes	No	No	No	No	No	No
CD101	No	No	No	No	No	No	No	Yes	No	No	No	No	No	No
CD300C	No	No	No	No	No	No	No	Yes	No	No	No	No	No	No
CD300LF	No	No	No	No	No	No	No	Yes	No	No	No	Yes	No	No
CHIA	No	No	No	No	No	No	No	Yes	No	No	No	No	Yes	No
CLDN18	No	No	No	No	No	No	No	Yes	No	No	No	No	Yes	No
CLEC14A	No	No	No	No	No	No	No	Yes	No	No	No	No	No	No
CLEC6A	No	No	No	No	No	No	No	Yes	No	No	No	No	No	No
CLIC5	No	No	No	No	No	No	No	Yes	No	No	No	No	No	No
COL6A5	No	No	No	No	No	No	No	Yes	No	No	No	No	No	No
COL6A6	No	No	No	No	No	No	No	Yes	No	No	No	No	No	No
COX4I2	No	No	No	No	No	No	No	Yes	No	No	Yes	No	No	No
CPAMD8	No	No	No	No	No	No	No	Yes	No	No	No	No	No	No
CRTAC1	No	No	No	No	No	No	No	Yes	No	No	No	No	No	No
CSF2	No	No	No	No	No	No	No	Yes	No	No	No	No	No	No
CYP2F1	No	No	No	No	No	No	No	Yes	No	No	No	No	No	No
CYP4B1	No	No	No	No	No	No	No	Yes	No	No	No	No	No	No
DCSTAMP	No	No	No	No	No	No	No	Yes	No	No	No	No	No	No
DNoH5	No	No	No	No	No	No	No	Yes	No	No	No	No	No	No
EFCC1	No	No	No	No	No	No	No	Yes	No	No	No	No	No	No
EMP2	No	No	No	No	No	No	No	Yes	No	No	No	No	No	No
ESYT3	No	No	No	No	No	No	No	Yes	No	No	No	No	No	Yes
FBN3	No	No	No	No	No	No	No	Yes	No	No	No	No	No	Yes
FGFR4	No	No	No	No	No	No	No	Yes	No	No	No	No	No	No
FOLR1	No	No	No	No	No	No	No	Yes	No	No	No	No	No	No
FOXA2	No	No	No	No	No	No	No	Yes	No	No	No	No	Yes	No
GALNT5	No	No	No	No	No	No	No	Yes	No	No	No	No	Yes	No
GDF10	No	No	No	No	No	No	No	Yes	No	No	No	No	No	No
GGT2	No	No	No	No	No	No	No	Yes	No	No	No	No	No	Yes
GGTLC1	No	No	No	No	No	No	No	Yes	No	No	No	No	No	No
GGTLC3	No	No	No	No	No	No	No	Yes	No	No	No	No	No	No
GPRC5A	No	No	No	No	No	No	No	Yes	No	No	No	No	No	No
GPRIN2	No	No	No	No	No	No	No	Yes	No	No	No	No	No	No
GRP	No	No	No	No	No	No	No	Yes	No	No	No	No	No	Yes
HAS3	No	No	No	No	No	No	No	Yes	No	No	No	No	No	No
HHIP	No	No	No	No	No	No	No	Yes	No	No	No	No	No	No
HIGD1B	No	No	No	No	No	No	No	Yes	No	No	Yes	No	No	No
HLA-DMA	No	No	No	No	No	No	No	Yes	No	No	No	No	No	No
HLA-DQA1	No	No	No	No	No	No	No	Yes	No	No	No	No	No	No
HLA-DQB2	No	No	No	No	No	No	No	Yes	No	No	No	No	No	No
HLA-DRA	No	No	No	No	No	No	No	Yes	No	No	No	No	No	No
HLA-DRB1	No	No	No	No	No	No	No	Yes	No	No	No	No	No	No
HLA-DRB5	No	No	No	No	No	No	No	Yes	No	No	No	No	No	No
HMCN1	No	No	No	No	No	No	No	Yes	No	No	No	No	No	No
HTR3C	No	No	No	No	No	No	No	Yes	No	No	No	No	No	No
ICAM4	No	No	No	No	No	No	No	Yes	No	No	No	No	No	No
INMT	No	No	No	No	No	No	No	Yes	No	No	No	No	No	No
ITGAE	No	No	No	No	No	No	No	Yes	No	No	No	No	No	No
ITGB6	No	No	No	No	No	No	No	Yes	No	No	No	No	No	No
KCNK17	No	No	No	No	No	No	No	Yes	No	No	No	No	No	No
KCNS3	No	No	No	No	No	No	No	Yes	No	No	No	No	No	No
KHDC3L	No	No	No	No	No	No	No	Yes	No	No	No	No	No	No
KHDRBS2	No	No	No	No	No	No	No	Yes	No	No	No	No	No	Yes
KIAA1324L	No	No	No	No	No	No	No	Yes	No	No	No	No	No	No
LAMP3	No	No	No	No	No	No	No	Yes	No	No	No	No	No	No
LGI3	No	No	No	No	No	No	No	Yes	No	No	No	No	No	Yes
LIMCH1	No	No	No	No	No	No	No	Yes	No	No	No	No	No	No
LPCAT1	No	No	No	No	No	No	No	Yes	No	No	No	Yes	No	No
LRRK2	No	No	No	No	No	No	No	Yes	No	No	No	No	No	No
LRRN4	No	No	No	No	No	No	No	Yes	No	No	No	No	No	No
MARCO	No	No	No	No	No	No	No	Yes	No	No	No	No	No	No
MATN3	No	No	No	No	No	No	No	Yes	No	No	Yes	No	No	No
MMP13	No	No	No	No	No	No	No	Yes	No	No	No	No	No	No
MRC1	No	No	No	No	No	No	No	Yes	No	No	No	No	No	No
MS4A15	No	No	No	No	No	No	No	Yes	No	No	No	No	No	No
MS4A2	No	No	No	No	No	No	No	Yes	No	No	No	No	No	No
MSLN	No	No	No	No	No	No	No	Yes	No	No	No	No	No	No
MSR1	No	No	No	No	No	No	No	Yes	No	No	No	No	No	No
MUC1	No	No	No	No	No	No	No	Yes	No	No	No	No	Yes	No
NoPSA	No	No	No	No	No	No	No	Yes	No	No	No	No	No	No
NCKAP5	No	No	No	No	No	No	No	Yes	No	No	No	No	No	No
NDNF	No	No	No	No	No	No	No	Yes	No	No	Yes	No	No	No
NINJ2	No	No	No	No	No	No	No	Yes	No	No	No	No	No	No
NKD2	No	No	No	No	No	No	No	Yes	No	No	No	No	No	No
NKX2-1	No	No	No	No	No	No	No	Yes	No	No	No	No	No	Yes
NOTCH4	No	No	No	No	No	No	No	Yes	No	No	No	No	No	No
OLR1	No	No	No	No	No	No	No	Yes	No	No	Yes	No	No	No
OSCAR	No	No	No	No	No	No	No	Yes	No	No	No	No	No	No
OVCH1	No	No	No	No	No	No	No	Yes	No	No	No	No	No	Yes
PCDHA12	No	No	No	No	No	No	No	Yes	No	No	No	No	No	No
PRX	No	No	No	No	No	No	No	Yes	No	No	No	No	No	No
PTGIR	No	No	No	No	No	No	No	Yes	No	No	No	No	No	No
PTPRQ	No	No	No	No	No	No	No	Yes	No	No	No	No	No	No
RAMP3	No	No	No	No	No	No	No	Yes	No	No	No	No	No	No
RASGRF1	No	No	No	No	No	No	No	Yes	No	No	No	No	No	No
ROS1	No	No	No	No	No	No	No	Yes	No	No	No	No	No	No
RP1	No	No	No	No	No	No	No	Yes	No	No	No	No	No	No
RS1	No	No	No	No	No	No	No	Yes	No	No	No	No	No	No
RSPO4	No	No	No	No	No	No	No	Yes	No	No	No	No	No	No
RTKN2	No	No	No	No	No	No	No	Yes	No	No	No	No	No	No
S100A3	No	No	No	No	No	No	No	Yes	No	No	No	No	No	No
SCGB1A1	No	No	No	No	No	No	No	Yes	No	No	No	No	No	No
SCGB3A2	No	No	No	No	No	No	No	Yes	No	No	No	No	No	No
SCN1A	No	No	No	No	No	No	No	Yes	No	No	No	No	No	No
SCTR	No	No	No	No	No	No	No	Yes	No	Yes	No	No	No	No
SEC14L6	No	No	No	No	No	No	No	Yes	No	No	No	No	No	No
SFTA2	No	No	No	No	No	No	No	Yes	No	No	No	No	No	No
SFTA3	No	No	No	No	No	No	No	Yes	No	No	No	No	No	Yes
SFTPA1	No	No	No	No	No	No	No	Yes	No	No	No	No	No	No
SFTPA2	No	No	No	No	No	No	No	Yes	No	No	No	No	No	No
SFTPB	No	No	No	No	No	No	No	Yes	No	No	No	No	No	No
SFTPC	No	No	No	No	No	No	No	Yes	No	No	No	No	No	No
SFTPD	No	No	No	No	No	No	No	Yes	No	No	No	No	No	No
SHROOM4	No	No	No	No	No	No	No	Yes	No	No	No	No	No	No
SLC11A1	No	No	No	No	No	No	No	Yes	No	No	No	No	No	No
SLC22A31	No	No	No	No	No	No	No	Yes	No	No	No	No	No	No
SLC26A9	No	No	No	No	No	No	No	Yes	No	No	No	No	Yes	No
SLC34A2	No	No	No	No	No	No	No	Yes	No	No	No	No	No	No
SLC39A8	No	No	No	No	No	No	No	Yes	No	No	No	No	No	No
SLC46A2	No	No	No	No	No	No	No	Yes	No	No	No	No	No	No
SLC6A14	No	No	No	No	No	No	No	Yes	No	No	No	No	No	No
SLC6A4	No	No	No	No	No	No	No	Yes	No	No	Yes	No	No	No
SLC6A5	No	No	No	No	No	No	No	Yes	No	No	No	No	No	No
SMAD6	No	No	No	No	No	No	No	Yes	No	No	No	No	No	No
SOSTDC1	No	No	No	No	No	No	No	Yes	No	No	No	No	Yes	No
SPN	No	No	No	No	No	No	No	Yes	No	No	No	No	No	No
SPOCK2	No	No	No	No	No	No	No	Yes	No	No	No	No	No	No
STAC	No	No	No	No	No	No	No	Yes	No	No	No	No	No	No
SUSD2	No	No	No	No	No	No	No	Yes	No	No	No	No	No	No
SYNDIG1L	No	No	No	No	No	No	No	Yes	No	No	No	No	No	No
TBX2	No	No	No	No	No	No	No	Yes	No	No	No	No	No	No
TBX4	No	No	No	No	No	No	No	Yes	No	No	Yes	No	No	No
TMEM100	No	No	No	No	No	No	No	Yes	No	No	Yes	No	No	No
TMEM125	No	No	No	No	No	No	No	Yes	No	No	No	No	No	No
TPSD1	No	No	No	No	No	No	No	Yes	No	No	No	No	No	No
TREM1	No	No	No	No	No	No	No	Yes	No	No	No	No	No	No
TREM2	No	No	No	No	No	No	No	Yes	No	No	No	No	No	No
TUBB1	No	No	No	No	No	No	No	Yes	No	No	Yes	Yes	No	No
VIPR1	No	No	No	No	No	No	No	Yes	No	No	No	No	No	No
WIF1	No	No	No	No	No	No	No	Yes	No	No	No	No	No	No
ZNF385B	No	No	No	No	No	No	No	Yes	No	No	No	No	No	No
ADAMTS1	No	No	No	No	No	No	No	No	Yes	No	No	No	No	No
ADAMTS16	No	No	No	No	No	No	No	No	Yes	No	No	No	No	No
ADRB3	No	No	No	No	No	No	No	No	Yes	No	Yes	No	No	No
AJAP1	No	No	No	No	No	No	No	No	Yes	No	No	No	No	No
ART5	No	No	No	No	No	No	No	No	Yes	No	No	No	No	No
ARX	No	No	No	No	No	No	No	No	Yes	No	No	No	No	No
ASIP	No	No	No	No	No	No	No	No	Yes	No	No	No	No	No
ASXL3	No	No	No	No	No	No	No	No	Yes	No	No	No	No	No
B4GALNT4	No	No	No	No	No	No	No	No	Yes	No	No	No	No	No
BAMBI	No	No	No	No	No	No	No	No	Yes	No	No	No	No	No
BNC2	No	No	No	No	No	No	No	No	Yes	No	No	No	No	No
C21ORF62	No	No	No	No	No	No	No	No	Yes	No	No	No	No	No
CACNo1H	No	No	No	No	No	No	No	No	Yes	No	No	No	No	No
CAMK1G	No	No	No	No	No	No	No	No	Yes	No	No	No	No	No
CCBE1	No	No	No	No	No	No	No	No	Yes	No	No	No	No	No
CCDC8	No	No	No	No	No	No	No	No	Yes	No	No	No	No	No
CCL26	No	No	No	No	No	No	No	No	Yes	No	No	No	No	No
CD22	No	No	No	No	No	No	No	No	Yes	No	No	No	No	No
CDH11	No	No	No	No	No	No	No	No	Yes	No	No	No	No	No
CDH23	No	No	No	No	No	No	No	No	Yes	No	No	No	No	No
CDK15	No	No	No	No	No	No	No	No	Yes	No	No	No	No	No
CLSTN2	No	No	No	No	No	No	No	No	Yes	No	No	No	No	No
CPZ	No	No	No	No	No	No	No	No	Yes	No	No	No	No	No
CRYGD	No	No	No	No	No	No	No	No	Yes	No	No	No	No	No
DIRAS3	No	No	No	No	No	No	No	No	Yes	No	No	No	No	No
DPF3	No	No	No	No	No	No	No	No	Yes	No	No	No	No	No
ECEL1	No	No	No	No	No	No	No	No	Yes	No	No	No	No	No
EMILIN3	No	No	No	No	No	No	No	No	Yes	No	No	No	No	No
EML5	No	No	No	No	No	No	No	No	Yes	No	No	No	No	No
ENPP6	No	No	No	No	No	No	No	No	Yes	No	No	No	No	No
EPHA6	No	No	No	No	No	No	No	No	Yes	No	No	No	No	No
FFAR1	No	No	No	No	No	No	No	No	Yes	No	No	No	No	No
FGF10	No	No	No	No	No	No	No	No	Yes	No	No	No	No	No
FKBP7	No	No	No	No	No	No	No	No	Yes	No	No	No	No	No
FLRT2	No	No	No	No	No	No	No	No	Yes	No	No	No	No	No
FOXL2	No	No	No	No	No	No	No	No	Yes	No	No	No	No	No
FRMPD3	No	No	No	No	No	No	No	No	Yes	No	No	No	No	Yes
FSHR	No	No	No	No	No	No	No	No	Yes	No	No	No	No	No
GATA4	No	No	No	No	No	No	No	No	Yes	No	No	No	No	No
GLI2	No	No	No	No	No	No	No	No	Yes	No	No	No	No	No
GNG4	No	No	No	No	No	No	No	No	Yes	No	No	No	No	No
GREB1	No	No	No	No	No	No	No	No	Yes	No	No	No	No	No
HOXC5	No	No	No	No	No	No	No	No	Yes	No	No	No	No	No
HOXC6	No	No	No	No	No	No	No	No	Yes	No	No	No	No	No
HS3ST1	No	No	No	No	No	No	No	No	Yes	No	No	No	No	No
HS6ST2	No	No	No	No	No	No	No	No	Yes	No	No	No	No	No
HTR1A	No	No	No	No	No	No	No	No	Yes	No	No	No	No	No
HTR1E	No	No	No	No	No	No	No	No	Yes	No	No	No	No	No
IGDCC4	No	No	No	No	No	No	No	No	Yes	No	No	No	No	No
IGFBP5	No	No	No	No	No	No	No	No	Yes	No	No	No	No	No
IGSF10	No	No	No	No	No	No	No	No	Yes	No	No	No	No	No
IRS4	No	No	No	No	No	No	No	No	Yes	No	No	No	No	Yes
KCNMB2	No	No	No	No	No	No	No	No	Yes	No	No	No	No	No
KCNT1	No	No	No	No	No	No	No	No	Yes	No	No	Yes	No	No
KCNT2	No	No	No	No	No	No	No	No	Yes	No	No	No	No	No
KLF15	No	No	No	No	No	No	No	No	Yes	No	No	No	No	No
KLHDC8A	No	No	No	No	No	No	No	No	Yes	No	No	No	No	No
LAMP5	No	No	No	No	No	No	No	No	Yes	No	No	No	No	No
LHX9	No	No	No	No	No	No	No	No	Yes	No	No	No	No	No
LPAR4	No	No	No	No	No	No	No	No	Yes	No	No	No	No	No
LRRC17	No	No	No	No	No	No	No	No	Yes	No	No	No	No	No
MCC	No	No	No	No	No	No	No	No	Yes	No	No	No	No	No
MEX3A	No	No	No	No	No	No	No	No	Yes	No	No	No	No	No
MKX	No	No	No	No	No	No	No	No	Yes	No	No	No	No	No
MMP21	No	No	No	No	No	No	No	No	Yes	No	No	No	No	No
MPL	No	No	No	No	No	No	No	No	Yes	No	No	No	No	No
MUM1L1	No	No	No	No	No	No	No	No	Yes	No	No	No	No	No
2023-11-03	No	No	No	No	No	No	No	No	Yes	No	No	No	No	No
NDP	No	No	No	No	No	No	No	No	Yes	No	No	No	No	No
NDST4	No	No	No	No	No	No	No	No	Yes	No	No	No	No	No
NGF	No	No	No	No	No	No	No	No	Yes	No	No	No	No	No
NR2F2	No	No	No	No	No	No	No	No	Yes	No	No	No	No	No
NRG2	No	No	No	No	No	No	No	No	Yes	No	No	No	No	No
NRK	No	No	No	No	No	No	No	No	Yes	No	Yes	No	No	No
NTF3	No	No	No	No	No	No	No	No	Yes	No	No	No	No	No
NXPH2	No	No	No	No	No	No	No	No	Yes	No	No	No	No	No
PABPC5	No	No	No	No	No	No	No	No	Yes	No	No	No	No	No
PCDH11X	No	No	No	No	No	No	No	No	Yes	No	No	No	No	No
PEG3	No	No	No	No	No	No	No	No	Yes	No	Yes	No	No	No
PROK1	No	No	No	No	No	No	No	No	Yes	No	Yes	No	No	No
PRSS35	No	No	No	No	No	No	No	No	Yes	No	No	No	No	No
RASL11B	No	No	No	No	No	No	No	No	Yes	No	No	No	No	No
RBP1	No	No	No	No	No	No	No	No	Yes	No	No	No	No	No
RHBG	No	No	No	No	No	No	No	No	Yes	No	No	No	No	No
SCN7A	No	No	No	No	No	No	No	No	Yes	No	No	No	No	No
SCUBE1	No	No	No	No	No	No	No	No	Yes	No	No	No	No	No
SGCZ	No	No	No	No	No	No	No	No	Yes	No	No	No	No	No
SIGLEC11	No	No	No	No	No	No	No	No	Yes	No	No	Yes	No	No
SNCAIP	No	No	No	No	No	No	No	No	Yes	No	No	No	No	No
STXBP5L	No	No	No	No	No	No	No	No	Yes	No	No	No	No	Yes
SYTL4	No	No	No	No	No	No	No	No	Yes	No	No	No	No	No
TCF23	No	No	No	No	No	No	No	No	Yes	No	No	No	No	No
TENM4	No	No	No	No	No	No	No	No	Yes	No	No	No	No	No
TLR5	No	No	No	No	No	No	No	No	Yes	No	No	No	No	No
TMEM221	No	No	No	No	No	No	No	No	Yes	No	No	No	No	No
TMEM255A	No	No	No	No	No	No	No	No	Yes	No	No	No	No	No
TYRO3	No	No	No	No	No	No	No	No	Yes	No	No	No	No	No
UCMA	No	No	No	No	No	No	No	No	Yes	No	No	No	No	No
USP6	No	No	No	No	No	No	No	No	Yes	No	No	No	No	No
VIT	No	No	No	No	No	No	No	No	Yes	No	No	No	No	No
VLDLR	No	No	No	No	No	No	No	No	Yes	No	No	No	No	No
VSX1	No	No	No	No	No	No	No	No	Yes	No	No	No	No	No
VWCE	No	No	No	No	No	No	No	No	Yes	No	No	No	No	No
WFIKKN2	No	No	No	No	No	No	No	No	Yes	No	No	No	No	No
WIPF3	No	No	No	No	No	No	No	No	Yes	No	No	No	No	No
WISP2	No	No	No	No	No	No	No	No	Yes	No	No	No	No	No
ZFPM2	No	No	No	No	No	No	No	No	Yes	No	No	No	No	No
ZNF556	No	No	No	No	No	No	No	No	Yes	No	No	No	No	No
ZNF66	No	No	No	No	No	No	No	No	Yes	No	No	No	No	No
ZNF98	No	No	No	No	No	No	No	No	Yes	No	No	No	No	No
AMY2A	No	No	No	No	No	No	No	No	No	Yes	No	No	No	No
AMY2B	No	No	No	No	No	No	No	No	No	Yes	No	No	No	No
AQP12A	No	No	No	No	No	No	No	No	No	Yes	No	No	No	No
AQP12B	No	No	No	No	No	No	No	No	No	Yes	No	No	No	No
BHLHA15	No	No	No	No	No	No	No	No	No	Yes	No	No	No	No
BRSK2	No	No	No	No	No	No	No	No	No	Yes	No	No	No	No
CCKBR	No	No	No	No	No	No	No	No	No	Yes	No	No	Yes	No
CEL	No	No	No	No	No	No	No	No	No	Yes	No	No	No	No
CELA2A	No	No	No	No	No	No	No	No	No	Yes	No	No	No	No
CELA2B	No	No	No	No	No	No	No	No	No	Yes	No	No	No	No
CELA3A	No	No	No	No	No	No	No	No	No	Yes	No	No	No	No
CELA3B	No	No	No	No	No	No	No	No	No	Yes	No	No	No	No
CFC1	No	No	No	No	No	No	No	No	No	Yes	No	No	Yes	No
CLPS	No	No	No	No	No	No	No	No	No	Yes	No	No	No	No
COCH	No	No	No	No	No	No	No	No	No	Yes	No	No	No	No
CPA1	No	No	No	No	No	No	No	No	No	Yes	No	No	No	No
CPA2	No	No	No	No	No	No	No	No	No	Yes	No	No	No	No
CPB1	No	No	No	No	No	No	No	No	No	Yes	No	No	No	No
CTRB1	No	No	No	No	No	No	No	No	No	Yes	No	No	No	No
CTRB2	No	No	No	No	No	No	No	No	No	Yes	No	No	No	No
CTRC	No	No	No	No	No	No	No	No	No	Yes	No	No	No	No
CTRL	No	No	No	No	No	No	No	No	No	Yes	No	No	No	No
CUZD1	No	No	No	No	No	No	No	No	No	Yes	No	No	No	No
ERP27	No	No	No	No	No	No	No	No	No	Yes	No	No	No	No
FAM159B	No	No	No	No	No	No	No	No	No	Yes	No	No	Yes	No
FBXW12	No	No	No	No	No	No	No	No	No	Yes	No	No	No	No
G6PC2	No	No	No	No	No	No	No	No	No	Yes	No	No	No	No
GCG	No	No	No	No	No	No	No	No	No	Yes	No	No	No	No
GP2	No	No	No	No	No	No	No	No	No	Yes	No	No	No	No
GPHA2	No	No	No	No	No	No	No	No	No	Yes	No	No	No	No
GPR150	No	No	No	No	No	No	No	No	No	Yes	No	No	No	No
IAPP	No	No	No	No	No	No	No	No	No	Yes	No	No	No	No
INS	No	No	No	No	No	No	No	No	No	Yes	No	No	No	No
INS-IGF2	No	No	No	No	No	No	No	No	No	Yes	Yes	No	No	No
KCNK16	No	No	No	No	No	No	No	No	No	Yes	No	No	Yes	No
KIRREL2	No	No	No	No	No	No	No	No	No	Yes	No	No	No	No
KLK1	No	No	No	No	No	No	No	No	No	Yes	No	No	No	No
LHB	No	No	No	No	No	No	No	No	No	Yes	No	No	No	No
NPHS1	No	No	No	No	No	No	No	No	No	Yes	No	No	No	No
PDIA2	No	No	No	No	No	No	No	No	No	Yes	No	No	No	No
PLA2G1B	No	No	No	No	No	No	No	No	No	Yes	No	No	No	No
PM20D1	No	No	No	No	No	No	No	No	No	Yes	No	No	No	No
PNLIP	No	No	No	No	No	No	No	No	No	Yes	No	No	No	No
PNLIPRP1	No	No	No	No	No	No	No	No	No	Yes	No	No	No	No
PPY	No	No	No	No	No	No	No	No	No	Yes	No	No	No	No
PRSS1	No	No	No	No	No	No	No	No	No	Yes	No	No	No	No
PRSS3	No	No	No	No	No	No	No	No	No	Yes	No	No	No	No
PTF1A	No	No	No	No	No	No	No	No	No	Yes	No	No	No	No
RBPJL	No	No	No	No	No	No	No	No	No	Yes	No	No	No	No
REG1A	No	No	No	No	No	No	No	No	No	Yes	No	No	No	No
SERPINI2	No	No	No	No	No	No	No	No	No	Yes	No	No	No	No
SFRP5	No	No	No	No	No	No	No	No	No	Yes	No	No	No	No
SLC30A8	No	No	No	No	No	No	No	No	No	Yes	No	No	No	No
SPINK1	No	No	No	No	No	No	No	No	No	Yes	No	No	No	No
SPSB4	No	No	No	No	No	No	No	No	No	Yes	No	Yes	No	No
SYCN	No	No	No	No	No	No	No	No	No	Yes	No	No	No	No
TEX11	No	No	No	No	No	No	No	No	No	Yes	No	No	No	No
TMED6	No	No	No	No	No	No	No	No	No	Yes	No	No	Yes	No
TMEM52	No	No	No	No	No	No	No	No	No	Yes	No	No	No	No
AADACL3	No	No	No	No	No	No	No	No	No	No	Yes	No	No	No
ACER2	No	No	No	No	No	No	No	No	No	No	Yes	No	Yes	No
ACKR2	No	No	No	No	No	No	No	No	No	No	Yes	No	No	No
ACVRL1	No	No	No	No	No	No	No	No	No	No	Yes	No	No	No
ADAM12	No	No	No	No	No	No	No	No	No	No	Yes	No	No	No
ADAMTS14	No	No	No	No	No	No	No	No	No	No	Yes	No	No	No
ADAMTS18	No	No	No	No	No	No	No	No	No	No	Yes	No	No	No
ADAMTS19	No	No	No	No	No	No	No	No	No	No	Yes	No	No	No
ADAMTS5	No	No	No	No	No	No	No	No	No	No	Yes	No	No	No
ADAMTS6	No	No	No	No	No	No	No	No	No	No	Yes	No	No	No
ADAMTS9	No	No	No	No	No	No	No	No	No	No	Yes	No	No	No
ADAMTSL4	No	No	No	No	No	No	No	No	No	No	Yes	No	No	No
ADCY4	No	No	No	No	No	No	No	No	No	No	Yes	No	No	No
ADRB1	No	No	No	No	No	No	No	No	No	No	Yes	No	No	No
AFF2	No	No	No	No	No	No	No	No	No	No	Yes	No	No	No
AGTR1	No	No	No	No	No	No	No	No	No	No	Yes	No	No	No
ALPP	No	No	No	No	No	No	No	No	No	No	Yes	No	No	No
ANGPTL1	No	No	No	No	No	No	No	No	No	No	Yes	No	No	No
AOC1	No	No	No	No	No	No	No	No	No	No	Yes	No	No	No
APLN	No	No	No	No	No	No	No	No	No	No	Yes	No	No	No
APLNR	No	No	No	No	No	No	No	No	No	No	Yes	Yes	No	No
AREG	No	No	No	No	No	No	No	No	No	No	Yes	No	No	No
ARID3A	No	No	No	No	No	No	No	No	No	No	Yes	No	No	No
ARMS2	No	No	No	No	No	No	No	No	No	No	Yes	No	No	No
ARTN	No	No	No	No	No	No	No	No	No	No	Yes	No	No	No
ATP1A4	No	No	No	No	No	No	No	No	No	No	Yes	No	No	No
BIRC7	No	No	No	No	No	No	No	No	No	No	Yes	No	No	No
BMP1	No	No	No	No	No	No	No	No	No	No	Yes	No	No	No
BMP5	No	No	No	No	No	No	No	No	No	No	Yes	No	No	No
BMP6	No	No	No	No	No	No	No	No	No	No	Yes	No	No	No
C1QTNF6	No	No	No	No	No	No	No	No	No	No	Yes	No	No	No
C2ORF83	No	No	No	No	No	No	No	No	No	No	Yes	No	No	No
CADM3	No	No	No	No	No	No	No	No	No	No	Yes	No	No	No
CAPN6	No	No	No	No	No	No	No	No	No	No	Yes	No	No	No
CCDC102B	No	No	No	No	No	No	No	No	No	No	Yes	No	No	No
CCDC68	No	No	No	No	No	No	No	No	No	No	Yes	No	No	No
CCNE1	No	No	No	No	No	No	No	No	No	No	Yes	No	No	No
CDH5	No	No	No	No	No	No	No	No	No	No	Yes	No	No	No
CDKN1C	No	No	No	No	No	No	No	No	No	No	Yes	No	No	No
CGA	No	No	No	No	No	No	No	No	No	No	Yes	No	No	No
CGB5	No	No	No	No	No	No	No	No	No	No	Yes	No	No	No
CGB8	No	No	No	No	No	No	No	No	No	No	Yes	No	No	No
CHAT	No	No	No	No	No	No	No	No	No	No	Yes	No	No	No
CLDN19	No	No	No	No	No	No	No	No	No	No	Yes	No	No	No
CLDN6	No	No	No	No	No	No	No	No	No	No	Yes	No	No	No
CLEC1A	No	No	No	No	No	No	No	No	No	No	Yes	No	No	No
CNTN5	No	No	No	No	No	No	No	No	No	No	Yes	No	No	Yes
COL11A1	No	No	No	No	No	No	No	No	No	No	Yes	No	No	No
COL15A1	No	No	No	No	No	No	No	No	No	No	Yes	No	No	No
COL21A1	No	No	No	No	No	No	No	No	No	No	Yes	No	No	No
COL4A1	No	No	No	No	No	No	No	No	No	No	Yes	No	No	No
COL4A2	No	No	No	No	No	No	No	No	No	No	Yes	No	No	No
COL5A3	No	No	No	No	No	No	No	No	No	No	Yes	No	No	No
COLEC12	No	No	No	No	No	No	No	No	No	No	Yes	No	No	No
CRH	No	No	No	No	No	No	No	No	No	No	Yes	No	No	No
CRLF1	No	No	No	No	No	No	No	No	No	No	Yes	No	No	No
CRYBB1	No	No	No	No	No	No	No	No	No	No	Yes	No	No	No
CSF2RA	No	No	No	No	No	No	No	No	No	No	Yes	No	No	No
CSF3R	No	No	No	No	No	No	No	No	No	No	Yes	No	No	No
CSH1	No	No	No	No	No	No	No	No	No	No	Yes	No	No	No
CSH2	No	No	No	No	No	No	No	No	No	No	Yes	No	No	No
CSHL1	No	No	No	No	No	No	No	No	No	No	Yes	No	No	No
CTHRC1	No	No	No	No	No	No	No	No	No	No	Yes	No	No	No
CXORF36	No	No	No	No	No	No	No	No	No	No	Yes	No	No	No
CXORF67	No	No	No	No	No	No	No	No	No	No	Yes	No	No	No
CYP19A1	No	No	No	No	No	No	No	No	No	No	Yes	No	No	No
CYSLTR2	No	No	No	No	No	No	No	No	No	No	Yes	No	No	No
CYTL1	No	No	No	No	No	No	No	No	No	No	Yes	No	No	No
DACT2	No	No	No	No	No	No	No	No	No	No	Yes	No	No	No
DIO3	No	No	No	No	No	No	No	No	No	No	Yes	No	No	No
DKK1	No	No	No	No	No	No	No	No	No	No	Yes	No	No	No
DLL4	No	No	No	No	No	No	No	No	No	No	Yes	No	No	No
DLX3	No	No	No	No	No	No	No	No	No	No	Yes	No	No	No
DLX4	No	No	No	No	No	No	No	No	No	No	Yes	No	No	No
DLX5	No	No	No	No	No	No	No	No	No	No	Yes	No	No	No
DLX6	No	No	No	No	No	No	No	No	No	No	Yes	No	No	No
DPP4	No	No	No	No	No	No	No	No	No	No	Yes	No	No	No
DPPA4	No	No	No	No	No	No	No	No	No	No	Yes	No	No	No
DPRX	No	No	No	No	No	No	No	No	No	No	Yes	No	No	No
DSCR4	No	No	No	No	No	No	No	No	No	No	Yes	No	No	No
DUSP9	No	No	No	No	No	No	No	No	No	No	Yes	No	No	No
EBI3	No	No	No	No	No	No	No	No	No	No	Yes	No	No	No
EDNRB	No	No	No	No	No	No	No	No	No	No	Yes	No	No	No
EGFL6	No	No	No	No	No	No	No	No	No	No	Yes	No	No	No
EGFLAM	No	No	No	No	No	No	No	No	No	No	Yes	No	No	No
EGFR	No	No	No	No	No	No	No	No	No	No	Yes	No	No	No
EMILIN2	No	No	No	No	No	No	No	No	No	No	Yes	No	No	No
ENPP1	No	No	No	No	No	No	No	No	No	No	Yes	No	No	No
EPYC	No	No	No	No	No	No	No	No	No	No	Yes	No	No	No
ERVFRD-1	No	No	No	No	No	No	No	No	No	No	Yes	No	No	No
ERVMER34-1	No	No	No	No	No	No	No	No	No	No	Yes	No	No	No
ERVV-1	No	No	No	No	No	No	No	No	No	No	Yes	No	No	No
ERVV-2	No	No	No	No	No	No	No	No	No	No	Yes	No	No	No
ERVW-1	No	No	No	No	No	No	No	No	No	No	Yes	No	No	No
FAM124B	No	No	No	No	No	No	No	No	No	No	Yes	No	No	No
FAM156B	No	No	No	No	No	No	No	No	No	No	Yes	No	No	No
FAM162B	No	No	No	No	No	No	No	No	No	No	Yes	No	No	No
FAM184A	No	No	No	No	No	No	No	No	No	No	Yes	No	No	No
FBN1	No	No	No	No	No	No	No	No	No	No	Yes	No	No	No
FBN2	No	No	No	No	No	No	No	No	No	No	Yes	No	No	No
FCGR1A	No	No	No	No	No	No	No	No	No	No	Yes	No	No	No
FCGR2A	No	No	No	No	No	No	No	No	No	No	Yes	No	No	No
FCGR2B	No	No	No	No	No	No	No	No	No	No	Yes	No	No	No
FLT1	No	No	No	No	No	No	No	No	No	No	Yes	No	No	No
FN1	No	No	No	No	No	No	No	No	No	No	Yes	No	No	No
GCM1	No	No	No	No	No	No	No	No	No	No	Yes	No	No	No
GDF15	No	No	No	No	No	No	No	No	No	No	Yes	No	No	No
GDF6	No	No	No	No	No	No	No	No	No	No	Yes	No	No	No
GH1	No	No	No	No	No	No	No	No	No	No	Yes	No	No	No
GH2	No	No	No	No	No	No	No	No	No	No	Yes	No	No	No
GJA4	No	No	No	No	No	No	No	No	No	No	Yes	No	No	No
GJA5	No	No	No	No	No	No	No	No	No	No	Yes	No	No	No
GJB7	No	No	No	No	No	No	No	No	No	No	Yes	No	No	No
GJC1	No	No	No	No	No	No	No	No	No	No	Yes	No	No	No
GNGT1	No	No	No	No	No	No	No	No	No	No	Yes	No	No	No
GPC3	No	No	No	No	No	No	No	No	No	No	Yes	No	No	No
GPR1	No	No	No	No	No	No	No	No	No	No	Yes	No	No	No
GPR32	No	No	No	No	No	No	No	No	No	No	Yes	No	No	No
GUCY1A2	No	No	No	No	No	No	No	No	No	No	Yes	No	No	No
HACE1	No	No	No	No	No	No	No	No	No	No	Yes	No	No	No
HAPLN1	No	No	No	No	No	No	No	No	No	No	Yes	No	No	No
HBA1	No	No	No	No	No	No	No	No	No	No	Yes	No	No	No
HBA2	No	No	No	No	No	No	No	No	No	No	Yes	No	No	No
HBG1	No	No	No	No	No	No	No	No	No	No	Yes	No	No	No
HBG2	No	No	No	No	No	No	No	No	No	No	Yes	No	No	No
HBZ	No	No	No	No	No	No	No	No	No	No	Yes	No	No	No
HES7	No	No	No	No	No	No	No	No	No	No	Yes	No	No	No
HGF	No	No	No	No	No	No	No	No	No	No	Yes	No	No	No
HIC2	No	No	No	No	No	No	No	No	No	No	Yes	No	No	No
HIF3A	No	No	No	No	No	No	No	No	No	No	Yes	No	No	No
HLA-G	No	No	No	No	No	No	No	No	No	No	Yes	No	No	No
HMGCLL1	No	No	No	No	No	No	No	No	No	No	Yes	No	No	No
HOXA13	No	No	No	No	No	No	No	No	No	No	Yes	No	No	No
HPGDS	No	No	No	No	No	No	No	No	No	No	Yes	No	No	No
HSD17B1	No	No	No	No	No	No	No	No	No	No	Yes	No	No	No
HSD17B2	No	No	No	No	No	No	No	No	No	No	Yes	No	No	No
HSD3B1	No	No	No	No	No	No	No	No	No	No	Yes	No	No	No
HSPA6	No	No	No	No	No	No	No	No	No	No	Yes	No	No	No
HTR1B	No	No	No	No	No	No	No	No	No	No	Yes	No	Yes	No
HTR1F	No	No	No	No	No	No	No	No	No	No	Yes	No	No	No
HTRA4	No	No	No	No	No	No	No	No	No	No	Yes	No	No	No
HYAL4	No	No	No	No	No	No	No	No	No	No	Yes	No	No	No
IDO1	No	No	No	No	No	No	No	No	No	No	Yes	No	No	No
IFIT1B	No	No	No	No	No	No	No	No	No	No	Yes	No	No	No
IGDCC3	No	No	No	No	No	No	No	No	No	No	Yes	No	No	No
IGF2	No	No	No	No	No	No	No	No	No	No	Yes	No	No	No
IGF2BP1	No	No	No	No	No	No	No	No	No	No	Yes	No	No	No
IGF2BP3	No	No	No	No	No	No	No	No	No	No	Yes	No	No	No
IGFBP3	No	No	No	No	No	No	No	No	No	No	Yes	No	No	No
IL12RB2	No	No	No	No	No	No	No	No	No	No	Yes	No	No	No
IL1RL1	No	No	No	No	No	No	No	No	No	No	Yes	No	No	No
INSL4	No	No	No	No	No	No	No	No	No	No	Yes	No	No	No
ISL1	No	No	No	No	No	No	No	No	No	No	Yes	No	Yes	No
ISM2	No	No	No	No	No	No	No	No	No	No	Yes	No	No	No
JAM2	No	No	No	No	No	No	No	No	No	No	Yes	No	No	No
KDR	No	No	No	No	No	No	No	No	No	No	Yes	No	No	No
KISS1	No	No	No	No	No	No	No	No	No	No	Yes	No	No	No
KL	No	No	No	No	No	No	No	No	No	No	Yes	No	No	No
KLF14	No	No	No	No	No	No	No	No	No	No	Yes	No	No	No
KRT23	No	No	No	No	No	No	No	No	No	No	Yes	No	No	No
KRTAP26-1	No	No	No	No	No	No	No	No	No	No	Yes	No	No	No
L1TD1	No	No	No	No	No	No	No	No	No	No	Yes	No	No	No
LAMA2	No	No	No	No	No	No	No	No	No	No	Yes	No	No	No
LAMC1	No	No	No	No	No	No	No	No	No	No	Yes	No	No	No
LAMC3	No	No	No	No	No	No	No	No	No	No	Yes	No	No	No
LGALS13	No	No	No	No	No	No	No	No	No	No	Yes	No	No	No
LGALS14	No	No	No	No	No	No	No	No	No	No	Yes	No	No	No
LGALS16	No	No	No	No	No	No	No	No	No	No	Yes	No	No	No
LGR5	No	No	No	No	No	No	No	No	No	No	Yes	No	No	No
LHX8	No	No	No	No	No	No	No	No	No	No	Yes	No	No	No
LIN28B	No	No	No	No	No	No	No	No	No	No	Yes	No	No	No
LIPG	No	No	No	No	No	No	No	No	No	No	Yes	No	No	Yes
LYPD6	No	No	No	No	No	No	No	No	No	No	Yes	No	No	No
LYVE1	No	No	No	No	No	No	No	No	No	No	Yes	No	No	No
MAGEA10	No	No	No	No	No	No	No	No	No	No	Yes	No	No	No
MAGEA8	No	No	No	No	No	No	No	No	No	No	Yes	No	No	No
MBNL3	No	No	No	No	No	No	No	No	No	No	Yes	No	No	No
MEOX2	No	No	No	No	No	No	No	No	No	No	Yes	No	No	No
MEST	No	No	No	No	No	No	No	No	No	No	Yes	No	No	No
METTL21C	No	No	No	No	No	No	No	No	No	No	Yes	No	No	No
MKRN3	No	No	No	No	No	No	No	No	No	No	Yes	No	No	No
MMP11	No	No	No	No	No	No	No	No	No	No	Yes	No	No	No
MS4A4A	No	No	No	No	No	No	No	No	No	No	Yes	No	No	No
MSMP	No	No	No	No	No	No	No	No	No	No	Yes	No	No	No
MSX2	No	No	No	No	No	No	No	No	No	No	Yes	No	No	No
MTNR1B	No	No	No	No	No	No	No	No	No	No	Yes	No	No	No
MYCN	No	No	No	No	No	No	No	No	No	No	Yes	No	No	No
N4BP3	No	No	No	No	No	No	No	No	No	No	Yes	No	No	No
NoA11	No	No	No	No	No	No	No	No	No	No	Yes	No	No	No
NFE2L3	No	No	No	No	No	No	No	No	No	No	Yes	No	No	No
NID2	No	No	No	No	No	No	No	No	No	No	Yes	No	No	No
NNoT	No	No	No	No	No	No	No	No	No	No	Yes	No	No	No
NOG	No	No	No	No	No	No	No	No	No	No	Yes	No	No	No
NOTUM	No	No	No	No	No	No	No	No	No	No	Yes	No	No	No
NPFFR2	No	No	No	No	No	No	No	No	No	No	Yes	No	No	No
OPN3	No	No	No	No	No	No	No	No	No	No	Yes	No	No	No
P2RY1	No	No	No	No	No	No	No	No	No	No	Yes	No	No	No
P2RY14	No	No	No	No	No	No	No	No	No	No	Yes	No	No	No
P2RY6	No	No	No	No	No	No	No	No	No	No	Yes	Yes	No	No
PABPC4L	No	No	No	No	No	No	No	No	No	No	Yes	No	No	No
PAGE4	No	No	No	No	No	No	No	No	No	No	Yes	No	No	No
PAPPA	No	No	No	No	No	No	No	No	No	No	Yes	No	No	No
PAPPA2	No	No	No	No	No	No	No	No	No	No	Yes	No	No	No
PCDH10	No	No	No	No	No	No	No	No	No	No	Yes	No	No	No
PCDH12	No	No	No	No	No	No	No	No	No	No	Yes	No	No	No
PDE6H	No	No	No	No	No	No	No	No	No	No	Yes	No	No	No
PDGFB	No	No	No	No	No	No	No	No	No	No	Yes	No	No	No
PDPN	No	No	No	No	No	No	No	No	No	No	Yes	No	No	No
PGF	No	No	No	No	No	No	No	No	No	No	Yes	No	No	Yes
PHLDA2	No	No	No	No	No	No	No	No	No	No	Yes	No	No	No
PITX2	No	No	No	No	No	No	No	No	No	No	Yes	No	No	No
PLAC1	No	No	No	No	No	No	No	No	No	No	Yes	No	No	No
PLAGL1	No	No	No	No	No	No	No	No	No	No	Yes	No	No	No
PODNL1	No	No	No	No	No	No	No	No	No	No	Yes	No	No	No
POU6F2	No	No	No	No	No	No	No	No	No	No	Yes	No	No	No
PRDM6	No	No	No	No	No	No	No	No	No	No	Yes	No	No	No
PRG2	No	No	No	No	No	No	No	No	No	No	Yes	No	No	No
PRL	No	No	No	No	No	No	No	No	No	No	Yes	No	No	No
PRLR	No	No	No	No	No	No	No	No	No	No	Yes	No	No	No
PSG1	No	No	No	No	No	No	No	No	No	No	Yes	No	No	No
PSG11	No	No	No	No	No	No	No	No	No	No	Yes	No	No	No
PSG2	No	No	No	No	No	No	No	No	No	No	Yes	No	No	No
PSG3	No	No	No	No	No	No	No	No	No	No	Yes	No	No	No
PSG4	No	No	No	No	No	No	No	No	No	No	Yes	No	No	No
PSG5	No	No	No	No	No	No	No	No	No	No	Yes	No	No	No
PSG6	No	No	No	No	No	No	No	No	No	No	Yes	No	No	No
PSG8	No	No	No	No	No	No	No	No	No	No	Yes	No	No	No
PSG9	No	No	No	No	No	No	No	No	No	No	Yes	No	No	No
PTGES	No	No	No	No	No	No	No	No	No	No	Yes	No	No	No
RAPGEF5	No	No	No	No	No	No	No	No	No	No	Yes	No	No	No
REN	No	No	No	No	No	No	No	No	No	No	Yes	No	No	No
RGPD1	No	No	No	No	No	No	No	No	No	No	Yes	No	No	No
RSPO2	No	No	No	No	No	No	No	No	No	No	Yes	No	No	No
S1PR2	No	No	No	No	No	No	No	No	No	No	Yes	No	No	No
SCIN	No	No	No	No	No	No	No	No	No	No	Yes	No	No	No
SCN11A	No	No	No	No	No	No	No	No	No	No	Yes	Yes	No	No
SEMA6D	No	No	No	No	No	No	No	No	No	No	Yes	No	No	No
SERPINB9	No	No	No	No	No	No	No	No	No	No	Yes	No	No	No
SERPINE1	No	No	No	No	No	No	No	No	No	No	Yes	No	No	No
SERPINE2	No	No	No	No	No	No	No	No	No	No	Yes	No	No	No
SH2D5	No	No	No	No	No	No	No	No	No	No	Yes	No	No	No
SH3TC2	No	No	No	No	No	No	No	No	No	No	Yes	No	No	No
SIGLEC6	No	No	No	No	No	No	No	No	No	No	Yes	No	No	No
SKP2	No	No	No	No	No	No	No	No	No	No	Yes	No	No	No
SLC13A4	No	No	No	No	No	No	No	No	No	No	Yes	No	No	No
SLC16A10	No	No	No	No	No	No	No	No	No	No	Yes	No	No	No
SLC22A11	No	No	No	No	No	No	No	No	No	No	Yes	No	No	No
SLC2A1	No	No	No	No	No	No	No	No	No	No	Yes	No	No	No
SLC43A2	No	No	No	No	No	No	No	No	No	No	Yes	No	No	No
[truncated: 619 more rows]
