# Supplementary material for: A DNA methylation haplotype block landscape in human tissues and preimplantation embryos reveals regulatory elements defined by comethylation patterns
Source: HighWire-hosted journal article supplement (doi:10.1101/gr.278146.123), 2023-11-08
Supplement: Supplemental_Table_S7.xlsx [file Supplemental_Table_S7.xlsx]

## Sheet: README
Supplemental Table S7: Promoters with high methylation (>0.8) in human early embryos, presented in two separate sheets for promoters with or without MHBs.
Column names	Description
chr	Genomic positions of MHBs or promoters
start
end
gene	Gene symbol
stage	Cell type
Mean methylation	Mean DNA methylation
Expression	Gene expression

## Sheet: Promoters with MHBs
Promoter			MHB			Gene expression and DNA methylation
chr	start	end	chr	start	end	gene	stage	Mean methylation	Expression
chr11	133401396	133402596	chr11	132812662	132813732	OPCML	4-cell	0.857143	0.00653496
chr11	133401396	133402596	chr11	132812792	132812845	OPCML	4-cell	0.857143	0.00653496
chr11	133401396	133402596	chr11	132812849	132812945	OPCML	4-cell	0.857143	0.00653496
chr11	133401396	133402596	chr11	132813055	132813099	OPCML	4-cell	0.857143	0.00653496
chr11	133401396	133402596	chr11	132813673	132813704	OPCML	4-cell	0.857143	0.00653496
chr11	133401396	133402596	chr11	132813718	132813763	OPCML	4-cell	0.857143	0.00653496
chr1	245016519	245017719	chr1	245027018	245027080	HNRNPU	8-cell	1	151.681
chr1	245016519	245017719	chr1	245027153	245027207	HNRNPU	8-cell	1	151.681
chr1	245016519	245017719	chr19	41770536	41770564	HNRNPU	8-cell	1	151.681
chr2	232320234	232321434	chr2	232329069	232329140	NCL	8-cell	1	424.406
chr2	232577023	232578223	chr2	232573280	232573332	PTMA	8-cell	1	2424.58
chr22	42610347	42611547	chr22	42679766	42679818	TCF20	8-cell	1	4.57384
chr8	101714252	101715452	chr8	101733712	101733776	PABPC1	8-cell	1	943.601
chr12	109825523	109826723	chr12	109797119	109797184	MYO1H	Post_implantation	0.907216	0
chr19	803939	805139	chr19	804953	804982	PTBP1	Post_implantation	0.854462	103.613
chr2	232577023	232578223	chr2	232572807	232572834	PTMA	Post_implantation	1	3392.89
chr7	50799050	50800250	chr7	50849793	50849830	GRB10	Post_implantation	0.86	12.8511
chr7	50799050	50800250	chr7	50849909	50849986	GRB10	Post_implantation	0.86	12.8511
chr7	50799050	50800250	chr7	50850034	50850054	GRB10	Post_implantation	0.86	12.8511
chr7	50799050	50800250	chr7	50850215	50850243	GRB10	Post_implantation	0.86	12.8511
chr7	50799050	50800250	chr7	50850323	50850388	GRB10	Post_implantation	0.86	12.8511
chr7	50799050	50800250	chr7	50850499	50850564	GRB10	Post_implantation	0.86	12.8511
chrX	150564066	150565266	chrX	150565588	150565607	VMA21	Post_implantation	0.833333	17.9713
chrX	150564066	150565266	chrX	150565687	150565710	VMA21	Post_implantation	0.833333	17.9713
chr10	120818650	120819850	chr10	120840078	120840105	EIF3A	ICM	1	113.745
chr1	19614264	19615464	chr1	19615369	19615421	AKR7A3	Oocyte	0.821608	0.0123647
chr1	55504220	55505420	chr1	55505925	55505980	PCSK9	Oocyte	0.841237	8.41498
chr11	67120017	67121217	chr11	67120934	67121023	POLD4	Oocyte	0.817506	0.0175263
chr11	67120017	67121217	chr11	67120934	67121023	POLD4	Oocyte	0.817506	0.0175263
chr15	74702773	74703973	chr15	74726064	74726189	SEMA7A	Oocyte	1	0.39154
chr15	74702773	74703973	chr15	74726269	74726307	SEMA7A	Oocyte	1	0.39154
chr15	74702773	74703973	chr15	74726196	74726237	SEMA7A	Oocyte	1	0.39154
chr17	924799	925999	chr17	934939	934975	ABR	Oocyte	0.822947	4.07363
chr17	924799	925999	chr17	934992	935028	ABR	Oocyte	0.822947	4.07363
chr2	235935378	235936578	chr2	235873377	235873457	SH3BP4	Oocyte	0.827451	1.62394
chr22	50584483	50585683	chr22	50528600	50528623	MOV10L1	Oocyte	0.805556	0.288301
chr22	50584483	50585683	chr22	50528745	50528798	MOV10L1	Oocyte	0.805556	0.288301
chr5	66253900	66255100	chr5	66299853	66299906	MAST4	Oocyte	0.818182	27.3466
chr5	66253900	66255100	chr5	66300032	66300078	MAST4	Oocyte	0.818182	27.3466
chr6	144285615	144286815	chr6	144329015	144329067	PLAGL1	Oocyte	1	5.19802
chr6	144285615	144286815	chr6	144329256	144329282	PLAGL1	Oocyte	1	5.19802
chr6	144285615	144286815	chr6	144329308	144329331	PLAGL1	Oocyte	1	5.19802
chr6	144285615	144286815	chr6	144329358	144329382	PLAGL1	Oocyte	1	5.19802
chr6	144285615	144286815	chr6	144329385	144329444	PLAGL1	Oocyte	1	5.19802
chr6	144285615	144286815	chr6	144329555	144329617	PLAGL1	Oocyte	1	5.19802
chrX	51074673	51075873	chrX	51075774	51075879	NUDT10	Oocyte	0.825216	0.512145
chr1	245016519	245017719	chr1	245027649	245027755	HNRNPU	Morula	1	105.973
chr2	149803388	149804588	chr2	149632751	149632802	KIF5C	Morula	0.84	2.09313
chr2	232577023	232578223	chr2	232573280	232573315	PTMA	Morula	1	3725.15
chr10	72206704	72207904	chr10	72200788	72200859	NODAL	TE	1	0.00269918
chr2	232577023	232578223	chr2	232572398	232572447	PTMA	TE	1	4066.13
chr2	232577023	232578223	chr2	232572660	232572727	PTMA	TE	1	4066.13
chr12	123943250	123944450	chr12	123942297	123942330	SNRNP35	Zygote	0.928571	10.2524

## Sheet: Promoters without MHBs
Promoter
chr	start	end	gene	stage	Mean methylation	Expression
chr12	57037885	57039085	ATP5B	4-cell	1	193.517
chr16	85774306	85775506	C16orf74	4-cell	0.977273	41.8202
chr7	80274761	80275961	CD36	4-cell	1	48.6033
chr9	135936368	135937568	CEL	4-cell	0.923077	0.00931989
chr1	46971670	46972870	DMBX1	4-cell	1	0.155901
chr17	28267651	28268851	EFCAB5	4-cell	0.857143	0.00527263
chr3	186357187	186358387	FETUB	4-cell	1	0.0350843
chr11	71899958	71901158	FOLR1	4-cell	1	1.09625
chr5	156535055	156536255	HAVCR2	4-cell	1	0.155294
chr21	44984062	44985262	HSF2BP	4-cell	0.893443	195.077
chr1	27997703	27998903	IFI6	4-cell	0.8625	0.00360318
chr7	22765818	22767018	IL6	4-cell	0.857143	0.00253744
chr12	56105089	56106289	ITGA7	4-cell	1	0.0693731
chr9	705676	706876	KANK1	4-cell	1	2.7577
chr1	245396819	245398019	KIF26B	4-cell	0.813665	13.3677
chr1	32572656	32573856	KPNA6	4-cell	0.863636	30.0157
chr17	38181662	38182862	MED24	4-cell	0.803571	7.79019
chr19	56510091	56511291	NLRP5	4-cell	0.820513	122.335
chr17	180309	181509	RPH3AL	4-cell	0.866667	5.38321
chr19	49827448	49828648	SLC6A16	4-cell	0.833333	3.59135
chr12	53449727	53450927	TENC1	4-cell	1	0.0619228
chr5	140079031	140080231	ZMAT2	4-cell	1	125.895
chr12	133612871	133614071	ZNF84	4-cell	0.875	5.75754
chr1	104197301	104198501	AMY1A	8-cell	1	0.0112188
chr12	105626183	105627383	APPL2	8-cell	1	2.49324
chrX	135569105	135570305	BRS3	8-cell	0.833333	0.049983
chr10	77406266	77407466	C10orf11	8-cell	0.857143	0.484299
chr16	85774306	85775506	C16orf74	8-cell	0.921053	10.5421
chr21	34541541	34542741	C21orf54	8-cell	1	0
chr5	179071047	179072247	C5orf60	8-cell	0.9	0.0182339
chr6	24718382	24719582	C6orf62	8-cell	1	70.0548
chr1	65044529	65045729	CACHD1	8-cell	1	0.550189
chr10	12429980	12431180	CAMK1D	8-cell	1	1.40509
chr9	131621811	131623011	CCBL1	8-cell	1	1.62858
chr9	36168384	36169584	CCIN	8-cell	1	1.37932
chr7	80274761	80275961	CD36	8-cell	1	5.89004
chr5	21883562	21884762	CDH12	8-cell	1	5.07557
chr7	132718675	132719875	CHCHD3	8-cell	0.914894	18.8525
chr1	239791372	239792572	CHRM3	8-cell	1	3.6875
chr11	46773742	46774942	CKAP5	8-cell	1	20.2095
chr12	41220739	41221939	CNTN1	8-cell	1	0.0670245
chr20	23419321	23420521	CSTL1	8-cell	1	0
chr11	65646307	65647507	CTSW	8-cell	1	0.680533
chr17	62495957	62497157	DDX5	8-cell	1	790.84
chr10	127568861	127570061	DHX32	8-cell	1	1.76178
chr1	232060579	232061779	DISC1	8-cell	0.833333	0.0949898
chr1	46971670	46972870	DMBX1	8-cell	1	0.128961
chr21	37535838	37537038	DOPEY2	8-cell	1	2.70242
chr22	31794589	31795789	DRG1	8-cell	1	110.82
chr6	74227161	74228361	EEF1A1	8-cell	0.986667	5452.79
chr2	207025951	207027151	EEF1B2	8-cell	1	534.635
chr7	73604527	73605727	EIF4H	8-cell	0.805556	98.4419
chr7	102612876	102614076	FBXL13	8-cell	0.875	1.44876
chrX	14546419	14547619	GLRA2	8-cell	0.857143	0.917198
chr17	38073903	38075103	GSDMB	8-cell	1	2.62902
chrX	65386591	65387791	HEPH	8-cell	1	0
chr21	44984062	44985262	HSF2BP	8-cell	0.893665	56.7193
chr11	122927864	122929064	HSPA8	8-cell	1	3133.1
chr11	15135468	15136668	INSC	8-cell	0.9375	1.18496
chr11	1717424	1718624	KRTAP5-6	8-cell	1	0
chr4	113568713	113569913	LARP7	8-cell	1	28.6914
chr16	75149670	75150870	LDHD	8-cell	1	0.479073
chr1	180242816	180244016	LHX4	8-cell	1	0.858353
chr15	75104175	75105375	LMAN1L	8-cell	1	0
chr15	99796729	99797929	LRRC28	8-cell	1	13.56
chr8	56814414	56815614	LYN	8-cell	0.9375	0.527551
chr4	165117863	165119063	44986	8-cell	1	0.752676
chr12	57905470	57906670	MARS	8-cell	1	52.149
chr12	109825523	109826723	MYO1H	8-cell	1	1.88801
chr19	17202044	17203244	MYO9B	8-cell	1	0.915452
chr7	10978780	10979980	NDUFA4	8-cell	1	82.3183
chr1	114521095	114522295	OLFML3	8-cell	1	0.0512873
chr19	15903858	15905058	OR10H5	8-cell	1	0.123438
chr7	102045302	102046502	PRKRIP1	8-cell	1	54.4581
chr22	24032047	24033247	RGL4	8-cell	0.866667	0.0152988
chr9	130209916	130211116	RPL12	8-cell	1	1445.89
chr9	136215948	136217148	RPL7A	8-cell	1	3741.04
chr18	61222392	61223592	SERPINB12	8-cell	1	0
chr10	7227746	7228946	SFMBT2	8-cell	1	0.359992
chr3	143060087	143061287	SLC9A9	8-cell	1	0.786655
chr20	2442693	2443893	SNRPB	8-cell	1	296.81
chr15	25100658	25101858	SNRPN	8-cell	1	10.5081
chr16	30720857	30722057	SRCAP	8-cell	1	5.29339
chr17	56083607	56084807	SRSF1	8-cell	1	97.6844
chr9	100990499	100991699	TBC1D2	8-cell	0.8125	1.5126
chr1	179836975	179838175	TOR1AIP2	8-cell	1	37.6519
chr12	113681065	113682265	TPCN1	8-cell	0.97619	0.159509
chr7	98478319	98479519	TRRAP	8-cell	1	3.83397
chr19	57655570	57656770	ZIM3	8-cell	1	378.316
chr1	35830678	35831878	ZMYM4	8-cell	1	3.60617
chr20	52198636	52199836	ZNF217	8-cell	1	17.2861
chr7	63687851	63689051	ZNF679	8-cell	1	102.979
chr12	8324149	8325349	ZNF705A	8-cell	1	32.8515
chr16	20419855	20421055	ACSM5	Post-implantation	0.839367	0
chr9	111623545	111624745	ACTL7A	Post-implantation	0.883853	0
chr9	111617266	111618466	ACTL7B	Post-implantation	0.833034	0.193866
chr1	154577729	154578929	ADAR	Post-implantation	0.844444	43.5796
chr7	44149447	44150647	AEBP1	Post-implantation	0.801867	1.37534
chr2	100758052	100759252	AFF3	Post-implantation	1	0.0333322
chr3	125654887	125656087	ALG1L	Post-implantation	0.894462	1.29054
chr12	53816638	53817838	AMHR2	Post-implantation	1	0
chr12	121791012	121792212	ANAPC5	Post-implantation	0.821801	94.0305
chr8	108347743	108348943	ANGPT1	Post-implantation	0.850731	6.66263
chr4	113781142	113782342	ANK2	Post-implantation	0.812937	2.0084
chr7	117863757	117864957	ANKRD7	Post-implantation	0.854875	1.84732
chr1	161192418	161193618	APOA2	Post-implantation	1	0.374563
chr17	64224533	64225733	APOH	Post-implantation	0.817485	0
chr2	241621302	241622502	AQP12B	Post-implantation	0.816309	0
chr20	61917159	61918359	ARFGAP1	Post-implantation	0.813442	14.3344
chr8	145830080	145831280	ARHGAP39	Post-implantation	0.846847	0.457605
chr1	176997581	176998781	ASTN1	Post-implantation	0.811765	0
chrX	18238024	18239224	BEND2	Post-implantation	0.819871	0.00736019
chr12	51716958	51718158	BIN2	Post-implantation	0.820455	0
chr9	136918411	136919611	BRD3	Post-implantation	0.806698	36.4503
chr10	75681535	75682735	C10orf55	Post-implantation	0.852071	0.0559991
chr11	558476	559676	C11orf35	Post-implantation	0.815565	0.00476075
chr15	73734504	73735704	C15orf60	Post-implantation	0.833464	0
chr16	85774306	85775506	C16orf74	Post-implantation	1	0.2383
chr19	41948060	41949260	C19orf69	Post-implantation	0.821429	0
chr1	92682471	92683671	C1orf146	Post-implantation	0.861748	0
chr1	112015605	112016805	C1orf162	Post-implantation	0.867238	0
chr1	85099703	85100903	C1orf180	Post-implantation	1	0
chr22	24104207	24105407	C22orf15	Post-implantation	0.873574	2.63538
chr22	50050167	50051367	C22orf34	Post-implantation	0.809047	0
chr2	241834573	241835773	C2orf54	Post-implantation	0.899485	0
chr19	6719661	6720861	C3	Post-implantation	0.840426	0.378005
chr5	95186935	95188135	C5orf27	Post-implantation	0.832599	0.208442
chr5	173415172	173416372	C5orf47	Post-implantation	0.81465	0.165501
chr5	169658988	169660188	C5orf58	Post-implantation	0.841287	0.465247
chr9	97847302	97848502	C9orf3	Post-implantation	0.825243	2.27574
chr16	87969135	87970335	CA5A	Post-implantation	0.87018	0
chrX	15804712	15805912	CA5B	Post-implantation	0.813333	1.38427
chr12	121711388	121712588	CAMKK2	Post-implantation	0.811315	2.63941
chr16	8954667	8955867	CARHSP1	Post-implantation	1	32.0378
chr20	54986091	54987291	CASS4	Post-implantation	0.819425	0.189383
chr11	65792950	65794150	CATSPER1	Post-implantation	0.852308	0
chr16	88948922	88950122	CBFA2T3	Post-implantation	0.868834	1.11847
chr19	56157765	56158965	CCDC106	Post-implantation	0.836226	0.626053
chr19	48821756	48822956	CCDC114	Post-implantation	0.845361	0.0637388
chr1	42997690	42998890	CCDC30	Post-implantation	0.84275	0.413635
chr15	74527666	74528866	CCDC33	Post-implantation	1	0
chr17	78071626	78072826	CCDC40	Post-implantation	0.837362	0.669498
chr11	118873303	118874503	CCDC84	Post-implantation	0.852691	12.2302
chr16	2494392	2495592	CCNF	Post-implantation	0.827972	12.1453
chr3	112050793	112051993	CD200	Post-implantation	0.81317	26.3569
chr11	2396406	2397606	CD81	Post-implantation	0.808281	140.527
chr4	76554712	76555912	CDKL2	Post-implantation	0.834951	1.4655
chr9	135936368	135937568	CEL	Post-implantation	0.970588	0.0674999
chr11	117191493	117192693	CEP164	Post-implantation	0.816106	1.70933
chr18	579379	580579	CETN1	Post-implantation	0.849638	0
chr7	132718675	132719875	CHCHD3	Post-implantation	0.916667	161.082
chr1	111771357	111772557	CHI3L2	Post-implantation	0.833333	0
chr1	239791372	239792572	CHRM3	Post-implantation	0.9	14.5929
chr7	90024605	90025805	CLDN12	Post-implantation	0.801843	6.68622
chr3	137728006	137729206	CLDN18	Post-implantation	0.805459	0.00594421
chr12	10104936	10106136	CLEC12A	Post-implantation	0.816651	0
chr19	14692895	14694095	CLEC17A	Post-implantation	0.854167	0
chr12	8286448	8287648	CLEC4A	Post-implantation	0.845326	0
chr12	10182205	10183405	CLEC9A	Post-implantation	0.831187	0
chr6	42895867	42897067	CNPY3	Post-implantation	0.801894	41.9728
chr1	24254559	24255759	CNR2	Post-implantation	0.829945	0
chr9	34567009	34568209	CNTFR	Post-implantation	1	1.18711
chr9	116970713	116971913	COL27A1	Post-implantation	0.80994	0.908087
chr4	46910262	46911462	COX7B2	Post-implantation	0.809717	0
chr7	129931973	129933173	CPA4	Post-implantation	0.804478	0.0377067
chr22	25614605	25615805	CRYBB2	Post-implantation	0.83237	1.25524
chr2	209009882	209011082	CRYGB	Post-implantation	0.822532	0
chr17	61987618	61988818	CSHL1	Post-implantation	0.888889	0.503396
chr8	114388381	114389581	CSMD3	Post-implantation	0.851796	0.000888325
chr13	37678801	37680001	CSNK1A1L	Post-implantation	0.851955	0.0104585
chr20	24928904	24930104	CST7	Post-implantation	0.831601	0
chrX	120008779	120009979	CT47B1	Post-implantation	0.904653	0
chrX	153880853	153882053	CTAG2	Post-implantation	0.822319	0
chr6	39864156	39865356	DAAM2	Post-implantation	0.804569	0.132769
chr19	3960510	3961710	DAPK3	Post-implantation	0.881583	2.33744
chr3	16645930	16647130	DAZL	Post-implantation	0.902918	1.4961
chr8	88885243	88886443	DCAF4L2	Post-implantation	0.891581	12.8173
chr16	70327679	70328879	DDX19B	Post-implantation	0.813089	22.6829
chr8	7672238	7673438	DEFB107A	Post-implantation	0.939227	0
chr20	30027434	30028634	DEFB123	Post-implantation	0.833333	0
chr11	46396951	46398151	DGKZ	Post-implantation	0.857798	4.05671
chr20	61513255	61514455	DIDO1	Post-implantation	0.853025	19.4396
chr1	232060579	232061779	DISC1	Post-implantation	0.979592	0.746278
chr17	7109590	7110790	DLG4	Post-implantation	1	0.174918
chr19	35991813	35993013	DMKN	Post-implantation	0.916667	58.0631
chr1	53924071	53925271	DMRTB1	Post-implantation	1	1.28507
chr19	11313303	11314503	DOCK6	Post-implantation	0.891036	3.45376
chr10	76817341	76818541	DUPD1	Post-implantation	1	0
chr1	1274088	1275288	DVL1	Post-implantation	0.903255	3.95516
chr10	131640638	131641838	EBF3	Post-implantation	0.81051	0.0620574
chr14	21213045	21214245	EDDM3A	Post-implantation	1	0
chr19	3981570	3982770	EEF2	Post-implantation	0.912791	35.0462
chr17	28267651	28268851	EFCAB5	Post-implantation	0.806818	0
chr9	139564053	139565253	EGFL7	Post-implantation	0.813051	20.3415
chr9	140681858	140683058	EHMT1	Post-implantation	0.8625	9.14208
chr17	7479128	7480328	EIF4A1	Post-implantation	0.821895	1012.08
chr7	1780946	1782146	ELFN1	Post-implantation	0.802805	0.0984031
chr16	67235298	67236498	ELMO3	Post-implantation	0.840475	0.0849087
chr5	111495222	111496422	EPB41L4A	Post-implantation	0.800337	3.88909
chr2	47603813	47605013	EPCAM	Post-implantation	1	221.595
chr1	23188719	23189919	EPHB2	Post-implantation	0.823875	1.30003
chr1	6488956	6490156	ESPN	Post-implantation	0.833333	0.054405
chr4	187186342	187187542	F11	Post-implantation	0.82151	0.00226456
chrX	154687276	154688476	F8A3	Post-implantation	0.888889	0.707721
chr1	32711822	32713022	FAM167B	Post-implantation	0.809524	0
chr11	47607202	47608402	FAM180B	Post-implantation	0.857143	0
chr3	150420350	150421550	FAM194A	Post-implantation	0.844093	0.0455638
chr1	113262188	113263388	FAM19A3	Post-implantation	1	0
chr6	116873293	116874493	FAM26D	Post-implantation	0.875175	0
chr7	128311319	128312519	FAM71F2	Post-implantation	0.863171	0
chr17	73933313	73934513	FBF1	Post-implantation	0.829103	0.448069
chr7	102612876	102614076	FBXL13	Post-implantation	0.808219	1.51083
chr12	117424142	117425342	FBXW8	Post-implantation	0.820872	1.59855
chr1	161474246	161475446	FCGR2A	Post-implantation	0.859453	0
chr8	11652081	11653281	FDFT1	Post-implantation	0.861925	127.403
chrX	76708646	76709846	FGF16	Post-implantation	0.833333	0.693684
chr1	152284934	152286134	FLG	Post-implantation	0.81735	0
chrX	147061856	147063056	FMR1NB	Post-implantation	0.832432	0
chr14	90041559	90042759	FOXN3	Post-implantation	1	16.6187
chrX	49120172	49121372	FOXP3	Post-implantation	0.833333	0
chr9	108281104	108282304	FSD1L	Post-implantation	0.911475	0.0993552
chrX	31089158	31090358	FTHL17	Post-implantation	0.851648	0
chr5	121186576	121187776	FTMT	Post-implantation	0.878174	0
chr15	90891679	90892879	GABARAPL3	Post-implantation	0.829961	0
chr5	170209722	170210922	GABRP	Post-implantation	0.851064	0
chrX	49159124	49160324	GAGE10	Post-implantation	0.853801	0
chrX	49225137	49226337	GAGE2C	Post-implantation	1	0
chr7	151652530	151653730	GALNTL5	Post-implantation	0.827586	0
chr20	23966512	23967712	GGTLC1	Post-implantation	0.811414	0
chr7	31002567	31003767	GHRHR	Post-implantation	0.833333	0
chr1	78509653	78510853	GIPC2	Post-implantation	0.820872	0.265782
chr19	48258109	48259309	GLTSCR2	Post-implantation	0.888063	5.59939
chr8	143915216	143916416	GML	Post-implantation	0.815951	0
chr19	55548632	55549832	GP6	Post-implantation	0.822511	0.0327826
chr14	66973124	66974324	GPHN	Post-implantation	1	2.75768
chr7	23285393	23286593	GPNMB	Post-implantation	1	0
chr7	74009294	74010494	GTF2IRD1	Post-implantation	0.825776	5.02273
chrX	154609354	154610554	H2AFB2	Post-implantation	1	0
chr12	96389143	96390343	HAL	Post-implantation	0.844587	0
chr6	22568794	22569994	HDGFL1	Post-implantation	0.890261	0
chr17	79659786	79660986	HGS	Post-implantation	0.807011	12.8513
chr6	26107364	26108564	HIST1H1T	Post-implantation	0.837457	0
chr1	12907609	12908809	HNRNPCL1	Post-implantation	0.8125	0.364902
chr17	40703940	40705140	HSD17B1	Post-implantation	0.853621	1.92341
chr21	44984062	44985262	HSF2BP	Post-implantation	0.833333	0.00307076
chr19	16253494	16254694	HSH2D	Post-implantation	0.80597	0.931068
chr11	125752508	125753708	HYLS1	Post-implantation	0.81289	2.64983
chr19	10449300	10450500	ICAM3	Post-implantation	1	2.29983
chr10	1067576	1068776	IDI2	Post-implantation	0.854573	5.98315
chr4	992497	993697	IDUA	Post-implantation	1	0.0305762
chr14	23841017	23842217	IL25	Post-implantation	1	0
chrY	59329366	59330566	IL9R	Post-implantation	0.9	0.668019
chr10	134493778	134494978	INPP5A	Post-implantation	0.877622	3.62897
chr11	96240588	96241788	JRKL	Post-implantation	0.910828	0.665655
chr14	106382837	106384037	KIAA0125	Post-implantation	0.835294	0
chr14	58905398	58906598	KIAA0586	Post-implantation	0.844444	4.39795
chr5	154392314	154393514	KIF4B	Post-implantation	0.803256	0.271768
chr2	149803388	149804588	KIF5C	Post-implantation	0.89022	9.50813
chr3	183272494	183273694	KLHL6	Post-implantation	0.837704	0.165046
chr17	38859004	38860204	KRT24	Post-implantation	1	0
chr12	52886041	52887241	KRT6A	Post-implantation	0.833756	0
chr21	32252899	32254099	KRTAP11-1	Post-implantation	0.833333	0
chr1	31211079	31212279	LAPTM5	Post-implantation	0.833333	0
chr5	169723781	169724981	LCP2	Post-implantation	0.802667	0.0171836
chr2	136593754	136594954	LCT	Post-implantation	0.811067	0
chr1	22137757	22138957	LDLRAD2	Post-implantation	1	0.0564734
chr19	2433998	2435198	LMNB2	Post-implantation	0.875471	32.9051
chr13	76193569	76194769	LMO7	Post-implantation	0.901639	0.763665
chr1	153231162	153232362	LOR	Post-implantation	1	0
chr7	100171842	100173042	LRCH4	Post-implantation	0.8708	1.45669
chr19	39804976	39806176	LRFN1	Post-implantation	0.880319	0.924007
chr7	102110915	102112115	LRWD1	Post-implantation	0.832349	10.329
chr8	56814414	56815614	LYN	Post-implantation	1	21.4675
chr1	166957325	166958525	MAEL	Post-implantation	0.840083	6.51451
chrX	151306049	151307249	MAGEA10	Post-implantation	0.829234	0
chrX	148792719	148793919	MAGEA11	Post-implantation	0.832192	0
chrX	151084396	151085596	MAGEA4	Post-implantation	0.955414	0
chrX	151866231	151867431	MAGEA6	Post-implantation	0.854167	0
chrX	30264262	30265462	MAGEB1	Post-implantation	0.820346	0.844878
chrX	140990679	140991879	MAGEC1	Post-implantation	0.880126	0
chrX	141292076	141293276	MAGEC2	Post-implantation	0.848207	0
chr16	1783985	1785185	MAPK8IP3	Post-implantation	0.886957	1.1477
chr1	31195432	31196632	MATN1	Post-implantation	1	0
chr7	99723589	99724789	MBLAC1	Post-implantation	0.859603	0.162173
chr12	49959222	49960422	MCRS1	Post-implantation	0.892791	37.6147
chr17	38181662	38182862	MED24	Post-implantation	0.820084	7.63321
chr19	42854282	42855482	MEGF8	Post-implantation	0.837121	0.617445
chr5	179224346	179225546	MGAT4B	Post-implantation	0.814658	0.327617
chr10	127463390	127464590	MMP21	Post-implantation	0.857143	0
chr3	108835981	108837181	MORC1	Post-implantation	0.916667	0
chr10	28577279	28578479	MPP7	Post-implantation	1	0.921168
chr11	18141501	18142701	MRGPRX3	Post-implantation	0.815331	0.138121
chr11	60281864	60283064	MS4A13	Post-implantation	0.837862	0
chr11	60196044	60197244	MS4A5	Post-implantation	1	0
chr17	79904109	79905309	MYADML2	Post-implantation	0.840183	0
chr20	33577275	33578475	MYH7B	Post-implantation	0.825256	0.00573471
chr8	2023668	2024868	MYOM2	Post-implantation	0.808039	0.169377
chr4	80246215	80247415	NAA11	Post-implantation	0.808463	0
chr12	7916811	7918011	NANOGNB	Post-implantation	0.896019	0.255152
chr7	102781850	102783050	NAPEPLD	Post-implantation	0.80023	1.80879
chr12	6618387	6619587	NCAPD2	Post-implantation	0.833333	24.1758
chr22	37256047	37257247	NCF4	Post-implantation	0.857143	0
chr2	106467302	106468502	NCK2	Post-implantation	0.801692	7.51148
chr12	124820788	124821988	NCOR2	Post-implantation	0.86804	3.45235
chr2	178119738	178120938	NFE2L2	Post-implantation	1	21.9607
chrX	102630250	102631450	NGFRAP1	Post-implantation	0.823271	631.044
chr19	56248768	56249968	NLRP9	Post-implantation	0.857143	0.263243
chrX	70502041	70503241	NONO	Post-implantation	1	218.461
chr12	117741857	117743057	NOS1	Post-implantation	0.845661	0.0602645
chr19	15289161	15290361	NOTCH3	Post-implantation	0.833364	4.86354
chr1	11906840	11908040	NPPA	Post-implantation	0.80137	0.264946
chr1	153661269	153662469	NPR1	Post-implantation	0.808176	0.999635
chr2	50922400	50923600	NRXN1	Post-implantation	1	0.692902
chr19	49175338	49176538	NTN5	Post-implantation	1	0.101187
chr11	71724336	71725536	NUMA1	Post-implantation	0.805851	8.06372
chr1	151738130	151739330	OAZ3	Post-implantation	0.846317	2.54546
chr6	74078515	74079715	OOEP	Post-implantation	0.904287	0
chrX	153447084	153448284	OPN1MW	Post-implantation	0.89272	0
chrX	153484202	153485402	OPN1MW2	Post-implantation	0.873171	0
chr9	107330448	107331648	OR13C8	Post-implantation	0.849589	0
chr9	125329756	125330956	OR1L8	Post-implantation	1	0
chr1	248083319	248084519	OR2T8	Post-implantation	0.833333	0
chr11	123809323	123810523	OR4D5	Post-implantation	0.876679	0
chr22	31126543	31127743	OSBP2	Post-implantation	0.881849	0.00185057
chrX	69281306	69282506	OTUD6A	Post-implantation	0.822196	1.6554
chr8	101714252	101715452	PABPC1	Post-implantation	1	1316.71
chr15	65576929	65578129	PARP16	Post-implantation	0.8125	1.69357
chrX	150731146	150732346	PASD1	Post-implantation	0.84375	0
chr11	65402780	65403980	PCNXL3	Post-implantation	0.82808	1.33535
chr11	60988820	60990020	PGA4	Post-implantation	1	0.206158
chr15	99550021	99551221	PGPEP1L	Post-implantation	0.896478	0
chr16	71731604	71732804	PHLPP2	Post-implantation	0.852405	5.05001
chr20	44053149	44054349	PIGT	Post-implantation	0.847882	27.5044
chr3	138425463	138426663	PIK3CB	Post-implantation	0.844252	2.99297
chr11	94299533	94300733	PIWIL4	Post-implantation	0.823493	0
chrX	133897352	133898552	PLAC1	Post-implantation	0.830189	0
chrY	149144	150344	PLCXD1	Post-implantation	1	12.2463
chr3	126706436	126707636	PLXNA1	Post-implantation	0.858974	1.85698
chr2	130885795	130886995	POTEF	Post-implantation	0.820411	0.108159
chr8	128427069	128428269	POU5F1B	Post-implantation	0.818182	10.1169
chr22	22899052	22900252	PRAME	Post-implantation	0.826979	0
chr3	64172219	64173419	PRICKLE2	Post-implantation	1	0.653953
chr9	71628039	71629239	PRKACG	Post-implantation	0.908428	0
chr7	102045302	102046502	PRKRIP1	Post-implantation	0.815217	7.51708
chr3	46874313	46875513	PRSS42	Post-implantation	0.820913	0.197205
chr19	47127346	47128546	PTGIR	Post-implantation	0.828326	0
chr7	105147967	105149167	PUS7	Post-implantation	0.804217	6.27469
chr3	49136347	49137547	QARS	Post-implantation	1	100.845
chr17	74302761	74303961	QRICH2	Post-implantation	0.880988	0.255665
chr7	4876081	4877281	RADIL	Post-implantation	0.858621	1.36236
chr22	41648054	41649254	RANGAP1	Post-implantation	0.857143	22.4389
chr15	79270230	79271430	RASGRF1	Post-implantation	1	0
chr17	9807588	9808788	RCVRN	Post-implantation	0.842654	0
chr1	211665259	211666459	RD3	Post-implantation	1	0.0053772
chr8	86573742	86574942	REXO1L1	Post-implantation	0.869843	0.393743
chr22	32749871	32751071	RFPL3	Post-implantation	0.821583	0.00671372
chr2	107083801	107085001	RGPD3	Post-implantation	0.880029	0.458273
chr2	108442387	108443587	RGPD4	Post-implantation	0.929638	0.472402
chr8	54763354	54764554	RGS20	Post-implantation	0.860523	0.0110357
chr16	88768989	88770189	RNF166	Post-implantation	0.813788	1.14151
chr13	25337306	25338506	RNF17	Post-implantation	0.860593	0
chr1	201971251	201972451	RNPEP	Post-implantation	0.947368	20.7854
chr14	47119984	47121184	RPL10L	Post-implantation	0.889073	10.1999
chr19	49993431	49994631	RPL13A	Post-implantation	0.815851	1618.09
chr8	99053445	99054645	RPL30	Post-implantation	0.87212	1513.42
chrX	100644784	100645984	RPL36A	Post-implantation	1	548.699
chr9	136215948	136217148	RPL7A	Post-implantation	1	3488.48
chr11	14385052	14386252	RRAS2	Post-implantation	0.806593	75.1777
chr3	187085172	187086372	RTP4	Post-implantation	0.831839	0
chr19	49512162	49513362	RUVBL2	Post-implantation	0.827586	106.946
chr13	23992109	23993309	SACS	Post-implantation	0.868696	2.77625
chr8	27742633	27743833	SCARA5	Post-implantation	1	0.00213247
chr15	32964266	32965466	SCG5	Post-implantation	0.830962	7.78436
chr7	12628147	12629347	SCIN	Post-implantation	0.833553	1.04377
chr17	62049278	62050478	SCN4A	Post-implantation	0.801795	0.174468
chr1	1214815	1216015	SCNN1D	Post-implantation	0.843038	0
chr5	115782193	115783393	SEMA6A	Post-implantation	0.810044	161.617
chr15	74702773	74703973	SEMA7A	Post-implantation	0.895404	0.329823
chr8	22018310	22019510	SFTPC	Post-implantation	0.9	0
chr2	235935378	235936578	SH3BP4	Post-implantation	0.81071	6.37304
chr10	112696013	112697213	SHOC2	Post-implantation	0.855578	6.54759
chr1	113464971	113466171	SLC16A1	Post-implantation	0.89719	67.1124
chr6	25925107	25926307	SLC17A2	Post-implantation	0.840772	0
chr1	53607310	53608510	SLC1A7	Post-implantation	0.81431	0.0814294
chr6	160678853	160680053	SLC22A2	Post-implantation	0.835558	0.0397424
chr1	108734457	108735657	SLC25A24	Post-implantation	0.866667	4.76773
chr4	128650554	128651754	SLC25A31	Post-implantation	0.852562	0
chr3	48670279	48671479	SLC26A6	Post-implantation	0.827642	4.24607
chr10	18239767	18240967	SLC39A12	Post-implantation	0.870711	0
chr2	44501618	44502818	SLC3A1	Post-implantation	0.859253	0.349096
chr17	19618897	19620097	SLC47A2	Post-implantation	0.819969	0.00247591
chr22	32650334	32651534	SLC5A4	Post-implantation	0.821346	0
chr12	365465	366665	SLC6A13	Post-implantation	1	0
chrX	115566773	115567973	SLC6A14	Post-implantation	1	0.0727537
chr5	101833705	101834905	SLCO6A1	Post-implantation	0.81775	0
chr19	11093799	11094999	SMARCA4	Post-implantation	0.800823	45.1324
chr5	70219767	70220967	SMN1	Post-implantation	0.883333	10.3284
chr5	69344349	69345549	SMN2	Post-implantation	0.881508	19.36
chr7	2296212	2297412	SNX8	Post-implantation	0.86725	11.3298
chr9	35811259	35812459	SPAG8	Post-implantation	0.87234	0.0189554
chrX	140671860	140673060	SPANXA1	Post-implantation	0.833333	0
chr17	3374099	3375299	SPATA22	Post-implantation	0.813073	0
chrX	48270332	48271532	SSX4B	Post-implantation	0.875	0.32565
chr10	17427934	17429134	ST8SIA6	Post-implantation	0.802398	1.64131
chr14	31482948	31484148	STRN3	Post-implantation	0.85291	7.83734
chr8	70504134	70505334	SULF1	Post-implantation	1	0.323173
chr7	871112	872312	SUN1	Post-implantation	0.893393	17.0333
chr20	43989588	43990788	SYS1	Post-implantation	0.833333	15.2709
chr10	105126732	105127932	TAF5	Post-implantation	0.801902	5.01869
chr9	108423737	108424937	TAL2	Post-implantation	0.851711	0
chr12	11338543	11339743	TAS2R42	Post-implantation	1	0
chr6	167796998	167798198	TCP10	Post-implantation	0.9	0
chr16	10787787	10788987	TEKT5	Post-implantation	0.829363	0
chr17	56768416	56769616	TEX14	Post-implantation	0.841073	0.32935
chrX	153522454	153523654	TEX28	Post-implantation	0.847334	0
chr15	66638680	66639880	TIPIN	Post-implantation	0.848446	46.4733
chr9	35709738	35710938	TLN1	Post-implantation	0.834016	1.32316
chr2	220412869	220414069	TMEM198	Post-implantation	0.839022	1.54832
chr4	68828211	68829411	TMPRSS11A	Post-implantation	1	0
chr2	217723787	217724987	TNP1	Post-implantation	0.833333	0
chr7	47503401	47504601	TNS3	Post-implantation	0.825908	6.45913
chr1	179836975	179838175	TOR1AIP2	Post-implantation	0.941176	2.45543
chr17	7577562	7578762	TP53	Post-implantation	0.876712	23.6928
chr12	113681065	113682265	TPCN1	Post-implantation	0.875	1.70432
chr11	118549359	118550559	TREH	Post-implantation	1	0
chr4	165952150	165953350	TRIM60	Post-implantation	0.873715	0
chr22	20101274	20102474	TRMT2A	Post-implantation	0.821871	11.3776
chr3	39178696	39179896	TTC21A	Post-implantation	0.816694	0.0196265
chr2	130955012	130956212	TUBA3E	Post-implantation	0.858382	0.127805
chr10	94178	95378	TUBB8	Post-implantation	0.801465	0.246455
chr19	49401001	49402201	TULP2	Post-implantation	0.818492	1.07207
chr1	64668305	64669505	UBE2U	Post-implantation	0.87766	0
chr20	62583736	62584936	UCKL1	Post-implantation	0.817577	29.7907
chr7	76609138	76610338	UPK3B	Post-implantation	0.830941	2.29813
chr21	33748631	33749831	URB1	Post-implantation	1	3.60247
chrX	8138308	8139508	VCX2	Post-implantation	0.938776	0
chrX	6452159	6453359	VCX3A	Post-implantation	0.895613	0.00586348
chrY	16097383	16098583	VCY	Post-implantation	0.833333	0.013546
chrY	16167106	16168306	VCY1B	Post-implantation	0.833333	0
chr3	11609272	11610472	VGLL4	Post-implantation	0.850279	3.02844
chr2	219282845	219284045	VIL1	Post-implantation	1	0.484905
chr4	10079316	10080516	WDR1	Post-implantation	0.830585	81.5375
chr9	137003913	137005113	WDR5	Post-implantation	0.874826	21.0311
chr15	53832300	53833500	WDR72	Post-implantation	0.802939	2.57028
chr8	56366881	56368081	XKR4	Post-implantation	0.856309	1.25712
chr16	17227360	17228560	XYLT1	Post-implantation	0.836826	2.81621
chr2	98349868	98351068	ZAP70	Post-implantation	0.833333	0.00305608
chr19	21932546	21933746	ZNF100	Post-implantation	0.866137	1.13147
chr12	133655788	133656988	ZNF140	Post-implantation	1	7.75441
chr5	121494870	121496070	ZNF474	Post-implantation	0.842424	0
chr19	9433447	9434647	ZNF559	Post-implantation	0.8758	16.0249
chr16	31075409	31076609	ZNF668	Post-implantation	0.83432	5.57275
chr3	113955425	113956625	ZNF80	Post-implantation	0.870439	0.451812
chr19	58378127	58379327	ZNF814	Post-implantation	0.839286	8.61288
chr16	85774306	85775506	C16orf74	ICM	0.92	0.044249
chr19	48546336	48547536	CABP5	ICM	1	0
chr1	46971670	46972870	DMBX1	ICM	1	0.177817
chr14	21213045	21214245	EDDM3A	ICM	1	0
chr5	170209722	170210922	GABRP	ICM	1	0
chrX	14546419	14547619	GLRA2	ICM	0.857143	0.0442936
chr5	145251531	145252731	GRXCR2	ICM	0.888889	0
chr21	44984062	44985262	HSF2BP	ICM	0.83667	1.68914
chr6	160513113	160514313	IGF2R	ICM	1	5.32605
chr10	72206704	72207904	NODAL	ICM	1	20.446
chr11	34962383	34963583	PDHX	ICM	1	30.2456
chr22	24032047	24033247	RGL4	ICM	1	0.00720512
chr13	78179686	78180886	SCEL	ICM	1	0.0373898
chr2	220033751	220034951	SLC23A3	ICM	1	0
chr10	75409798	75410998	SYNPO2L	ICM	1	0.358956
chr7	100238175	100239375	TFR2	ICM	1	0.0287406
chr15	52215317	52216517	TMOD3	ICM	1	20.5396
chr19	58863858	58865058	A1BG	Oocyte	0.820312	0.149105
chr4	8072715	8073915	ABLIM2	Oocyte	0.803355	0.942621
chr1	154577729	154578929	ADAR	Oocyte	0.846154	24.5871
chr16	50325526	50326726	ADCY7	Oocyte	0.801347	3.45841
chrX	129271015	129272215	AIFM1	Oocyte	1	8.18361
chr6	106958729	106959929	AIM1	Oocyte	0.833333	69.9038
chr1	95526151	95527351	ALG14	Oocyte	0.833333	0.849842
chr7	117863757	117864957	ANKRD7	Oocyte	0.87619	17.1718
chr12	101187553	101188753	ANO4	Oocyte	0.833333	0.425972
chr20	61917159	61918359	ARFGAP1	Oocyte	0.840625	0.0155267
chr8	145830080	145831280	ARHGAP39	Oocyte	0.859322	11.0645
chr20	37229451	37230651	ARHGAP40	Oocyte	0.909091	0.615432
chr1	17906047	17907247	ARHGEF10L	Oocyte	0.857143	0.0601199
chr14	94413648	94414848	ASB2	Oocyte	1	0.642526
chr1	176997581	176998781	ASTN1	Oocyte	0.857432	0
chr3	10370912	10372112	ATP2B2	Oocyte	0.862319	0.0813136
chr17	80963873	80965073	B3GNTL1	Oocyte	0.836134	1.16851
chr17	6925368	6926568	BCL6B	Oocyte	0.823652	0.0205026
chr11	118780416	118781616	BCL9L	Oocyte	0.859813	0.230435
chr22	23603953	23605153	BCR	Oocyte	0.896569	1.07916
chr11	558476	559676	C11orf35	Oocyte	0.826047	0
chr16	85774306	85775506	C16orf74	Oocyte	0.935484	71.7757
chr3	49313665	49314865	C3orf62	Oocyte	0.810311	0.167347
chr5	40908598	40909798	C7	Oocyte	1	0.0225092
chr8	11224910	11226110	C8orf12	Oocyte	0.875	150.316
chr9	97847302	97848502	C9orf3	Oocyte	0.881356	4.76098
chr7	93203036	93204236	CALCR	Oocyte	0.817869	0
chr7	134575208	134576408	CALD1	Oocyte	0.81044	0.0151728
chr12	121711388	121712588	CAMKK2	Oocyte	0.872849	0.982465
chr20	54986091	54987291	CASS4	Oocyte	0.833333	0.499669
chr11	65792950	65794150	CATSPER1	Oocyte	0.876238	0.0673116
chr16	88948922	88950122	CBFA2T3	Oocyte	0.825581	4.93684
chr19	48821756	48822956	CCDC114	Oocyte	0.906468	0.079994
chr1	42997690	42998890	CCDC30	Oocyte	0.867036	0.155369
chr3	122101078	122102278	CCDC58	Oocyte	0.833333	5.49062
chr16	2494392	2495592	CCNF	Oocyte	0.824524	0.633114
chr7	80274761	80275961	CD36	Oocyte	1	35.731
chr19	42132442	42133642	CEACAM4	Oocyte	1	0
chr13	111159526	111160726	COL4A2	Oocyte	0.865961	0.244051
chr2	238321850	238323050	COL6A3	Oocyte	0.861607	0.345172
chr12	58217475	58218675	CTDSP2	Oocyte	0.803571	7.32928
chr5	126987706	126988906	CTXN3	Oocyte	1	0
chr2	218989016	218990216	CXCR2	Oocyte	1	0.234994
chr1	60391445	60392645	CYP2J2	Oocyte	0.803922	0.154952
chr6	39864156	39865356	DAAM2	Oocyte	0.843945	1.39331
chrX	23017076	23018276	DDX53	Oocyte	0.844262	0
chr11	46396951	46398151	DGKZ	Oocyte	0.817043	0.0353752
chr1	46971670	46972870	DMBX1	Oocyte	1	0.0115666
chr17	7656637	7657837	DNAH2	Oocyte	0.834658	0.0425418
chr19	10927172	10928372	DNM2	Oocyte	0.835749	0.841227
chr19	11313303	11314503	DOCK6	Oocyte	0.923077	0.0775538
chr19	40323802	40325002	DYRK1B	Oocyte	0.800888	0
chr10	131640638	131641838	EBF3	Oocyte	1	1.15277
chr16	67235298	67236498	ELMO3	Oocyte	0.810811	0
chr9	130608446	130609646	ENG	Oocyte	0.827262	8.12331
chr19	36131646	36132846	ETV2	Oocyte	0.833333	0
chr7	128311319	128312519	FAM71F2	Oocyte	0.833333	0
chr19	46225754	46226954	FBXO46	Oocyte	0.875	0.307798
chr1	161474246	161475446	FCGR2A	Oocyte	0.833456	0.367779
chr12	4553780	4554980	FGF6	Oocyte	0.830154	0
chrX	49225137	49226337	GAGE2C	Oocyte	0.916667	0.0310382
chr21	34913423	34914623	GART	Oocyte	0.846154	2.20658
chr16	30123858	30125058	GDPD3	Oocyte	0.857506	0
chr4	8581118	8582318	GPR78	Oocyte	0.908333	0.0776953
chr3	141496042	141497242	GRK7	Oocyte	0.858209	4.70834
chr7	86272229	86273429	GRM3	Oocyte	0.9	0.53974
chr5	145251531	145252731	GRXCR2	Oocyte	1	0.0538948
chr3	129266227	129267427	H1FOO	Oocyte	0.808957	2828.39
chr12	96389143	96390343	HAL	Oocyte	0.85173	3.05656
chr17	79659786	79660986	HGS	Oocyte	0.892405	0.457783
chr1	222720446	222721646	HHIPL2	Oocyte	0.833333	0
chr6	32708167	32709367	HLA-DQA2	Oocyte	0.833333	0
chr12	121415345	121416545	HNF1A	Oocyte	0.817805	6.3173
chr21	44984062	44985262	HSF2BP	Oocyte	0.9	185.298
chr1	27997703	27998903	IFI6	Oocyte	0.825	0.0356852
chr6	52108298	52109498	IL17F	Oocyte	1	0
chr10	134493778	134494978	INPP5A	Oocyte	0.912281	0.742037
chr16	85935620	85936820	IRF8	Oocyte	0.831683	81.3165
chr1	947876	949076	ISG15	Oocyte	0.829932	0.264198
chr16	85095817	85097017	KIAA0513	Oocyte	0.824468	0.246515
chr22	25507659	25508859	KIAA1671	Oocyte	0.857143	4.9646
chr1	245396819	245398019	KIF26B	Oocyte	0.875	13.4926
chr1	45226706	45227906	KIF2C	Oocyte	1	96.9713
chr13	70681625	70682825	KLHL1	Oocyte	0.9	0.193207
chr1	32572656	32573856	KPNA6	Oocyte	0.928144	37.1807
chr19	2433998	2435198	LMNB2	Oocyte	0.898524	14.0916
chr19	39804976	39806176	LRFN1	Oocyte	0.881119	0.0422501
chr8	56814414	56815614	LYN	Oocyte	1	0.0559975
chr17	79880342	79881542	MAFG	Oocyte	0.871817	39.317
chr8	6478741	6479941	MCPH1	Oocyte	0.894737	15.3794
chr17	38181662	38182862	MED24	Oocyte	0.962264	1.17995
chr19	50334274	50335474	MED25	Oocyte	0.814516	46.3127
chr16	3305627	3306827	MEFV	Oocyte	0.833333	0.230699
chr7	141694678	141695878	MGAM	Oocyte	0.833333	0
chr17	74867728	74868928	MGAT5B	Oocyte	0.891986	14.5506
chr3	108835981	108837181	MORC1	Oocyte	1	0
chr12	122106560	122107760	MORN3	Oocyte	0.885021	0
chr11	18141501	18142701	MRGPRX3	Oocyte	0.92093	0.586646
chr1	76261566	76262766	MSH4	Oocyte	0.880952	0
chr7	102781850	102783050	NAPEPLD	Oocyte	0.812574	0.793442
chr2	106467302	106468502	NCK2	Oocyte	0.838983	30.4813
chr12	124820788	124821988	NCOR2	Oocyte	0.846214	0.617578
chr17	79608330	79609530	NPLOC4	Oocyte	0.816794	0.49099
chr15	96869590	96870790	NR2F2	Oocyte	0.934718	24.5589
chr7	2287945	2289145	NUDT1	Oocyte	0.825203	7.72886
chr11	71724336	71725536	NUMA1	Oocyte	0.833333	5.93995
chr17	3322861	3324061	OR3A3	Oocyte	0.844086	0.174937
chr19	9324547	9325747	OR7D4	Oocyte	1	1.20652
chrX	91089459	91090659	PCDH11X	Oocyte	0.924242	90.0179
chr19	46525311	46526511	PGLYRP1	Oocyte	0.835956	0
chr20	44053149	44054349	PIGT	Oocyte	0.879653	1.9338
chr3	126706436	126707636	PLXNA1	Oocyte	0.818731	0.929381
chr22	22899052	22900252	PRAME	Oocyte	0.883333	0.130121
chr4	16076741	16077941	PROM1	Oocyte	1	0
chr19	803939	805139	PTBP1	Oocyte	0.869944	10.6015
chr11	67204153	67205353	PTPRCAP	Oocyte	0.821429	0
chr17	74302761	74303961	QRICH2	Oocyte	0.874644	0
chr17	80625183	80626383	RAB40B	Oocyte	0.833333	0.693076
chr7	4876081	4877281	RADIL	Oocyte	0.862974	77.8545
chr11	7109228	7110428	RBMXL2	Oocyte	0.818915	0.0241376
chr19	50030259	50031459	RCN3	Oocyte	0.912718	0.0217266
chr5	63870476	63871676	RGS7BP	Oocyte	1	0
chr12	124003773	124004973	RILPL1	Oocyte	0.838753	0.199216
chr7	105171527	105172727	RINT1	Oocyte	0.833333	10.9233
chr6	18386580	18387780	RNF144B	Oocyte	0.837963	2.58342
chr14	47119984	47121184	RPL10L	Oocyte	0.812757	0
chr19	49993431	49994631	RPL13A	Oocyte	0.897099	745.05
chr22	39711901	39713101	RPL3	Oocyte	0.90625	644.074
chr8	99053445	99054645	RPL30	Oocyte	0.899666	1258.79
chr11	64135073	64136273	RPS6KA4	Oocyte	0.897348	0
chr14	75388145	75389345	RPS6KL1	Oocyte	0.867816	8.29673
chr17	78778432	78779632	RPTOR	Oocyte	0.894737	0.814541
chr1	41627689	41628889	SCMH1	Oocyte	1	1.53826
chr5	115782193	115783393	SEMA6A	Oocyte	0.803059	0.00223715
chr16	58548382	58549582	SETD6	Oocyte	0.888889	24.4506
chr3	15381887	15383087	SH3BP5	Oocyte	0.833333	137.071
chr5	148441625	148442825	SH3TC2	Oocyte	0.875	0
chr10	112696013	112697213	SHOC2	Oocyte	0.871324	1.64413
chrX	9879531	9880731	SHROOM2	Oocyte	1	2.72299
chr1	113464971	113466171	SLC16A1	Oocyte	0.909091	19.6319
chr7	150758633	150759833	SLC4A2	Oocyte	0.846939	0.179707
chr15	67457492	67458692	SMAD3	Oocyte	0.809365	7.8785
chr7	2296212	2297412	SNX8	Oocyte	0.861781	0.115976
chr21	34921967	34923167	SON	Oocyte	0.81571	36.5831
chr4	7460754	7461954	SORCS2	Oocyte	0.810484	1.17329
chr17	41835159	41836359	SOST	Oocyte	1	2.82913
chr17	3374099	3375299	SPATA22	Oocyte	0.817955	20.0239
chr12	49781956	49783156	SPATS2	Oocyte	0.854545	8.07454
chr2	229045361	229046561	SPHKAP	Oocyte	0.834526	1.69661
chr14	65289098	65290298	SPTB	Oocyte	0.862245	1.5693
chr7	871112	872312	SUN1	Oocyte	1	73.7003
chr12	118627340	118628540	TAOK3	Oocyte	0.9375	349.543
chr1	45271957	45273157	TCTEX1D4	Oocyte	0.858818	0
chr16	10787787	10788987	TEKT5	Oocyte	0.832179	0.3496
chr9	35709738	35710938	TLN1	Oocyte	0.814036	0.673503
chr2	220412869	220414069	TMEM198	Oocyte	0.82442	0.0970932
chr1	27649364	27650564	TMEM222	Oocyte	0.826271	2.34858
chr12	51235708	51236908	TMPRSS12	Oocyte	0.862745	0
chr3	13977806	13979006	TPRXL	Oocyte	1	338.3
chr22	26960307	26961507	TPST2	Oocyte	1	0.765023
chr22	20101274	20102474	TRMT2A	Oocyte	0.857143	0.0493608
chr4	122853268	122854468	TRPC3	Oocyte	0.824324	6.85483
chr21	45844446	45845646	TRPM2	Oocyte	0.831062	0.0723404
chr3	39178696	39179896	TTC21A	Oocyte	0.837838	0.0180313
chr16	28854328	28855528	TUFM	Oocyte	0.808765	8.8302
chr20	62583736	62584936	UCKL1	Oocyte	0.949219	1.66489
chr7	76609138	76610338	UPK3B	Oocyte	0.831858	0.0220749
chr17	5031103	5032303	USP6	Oocyte	0.82	0.08885
chr3	11609272	11610472	VGLL4	Oocyte	0.88961	43.9407
chr9	137003913	137005113	WDR5	Oocyte	0.815476	5.65961
chr19	33622019	33623219	WDR88	Oocyte	0.846074	0.0356852
chr3	55514426	55515626	WNT5A	Oocyte	0.850107	0.131025
chr16	17227360	17228560	XYLT1	Oocyte	0.842391	0.967224
chr19	21932546	21933746	ZNF100	Oocyte	0.888031	0.31775
chr16	31075409	31076609	ZNF668	Oocyte	0.833333	0.0267795
chr1	76209698	76210898	ACADM	Morula	1	0.234454
chr17	7125698	7126898	ACADVL	Morula	1	0
chr16	85774306	85775506	C16orf74	Morula	0.896552	3.22119
chr18	47791865	47793065	CCDC11	Morula	1	5.98194
chr7	80274761	80275961	CD36	Morula	1	0.924468
chr5	21883562	21884762	CDH12	Morula	1	0.163382
chr9	14721731	14722931	CER1	Morula	1	0
chr7	132718675	132719875	CHCHD3	Morula	1	9.24522
chr22	19034888	19036088	DGCR2	Morula	1	4.16854
chr1	46971670	46972870	DMBX1	Morula	1	0.332251
chr13	78491966	78493166	EDNRB	Morula	1	0.114719
chr6	74227161	74228361	EEF1A1	Morula	1	7431.56
chr19	3981570	3982770	EEF2	Morula	1	65.9848
chr1	169554719	169555919	F5	Morula	0.833333	0.102731
chrX	14546419	14547619	GLRA2	Morula	0.857143	0.263452
chr7	23285393	23286593	GPNMB	Morula	1	5.72484
chr17	42924250	42925450	HIGD1B	Morula	0.8125	0.0356295
chr21	44984062	44985262	HSF2BP	Morula	0.930556	10.3824
chr11	122927864	122929064	HSPA8	Morula	1	1539.47
chr19	10449300	10450500	ICAM3	Morula	1	3.40134
chrX	70330481	70331681	IL2RG	Morula	1	0.569192
chr11	15135468	15136668	INSC	Morula	0.933333	0.0409594
chr1	10289821	10291021	KIF1B	Morula	0.846154	9.08197
chr5	132208359	132209559	LEAP2	Morula	1	6.49946
chr8	56814414	56815614	LYN	Morula	0.928571	5.83862
chr5	179706608	179707808	MAPK9	Morula	1	0.97937
chr12	57905470	57906670	MARS	Morula	1	37.5867
chr16	28968903	28970103	NFATC2IP	Morula	1	77.3881
chr16	14926577	14927777	NOMO1	Morula	0.833333	2.13482
chr20	2635742	2636942	NOP56	Morula	1	468.788
chr12	100896137	100897337	NR1H4	Morula	1	0.631795
chr11	56257846	56259046	OR5M8	Morula	0.833333	0.00569106
chr6	163474193	163475393	PACRG	Morula	1	0
chr4	138452648	138453848	PCDH18	Morula	1	0
chr7	94952844	94954044	PON1	Morula	0.833333	0.310476
chr15	41119906	41121106	PPP1R14D	Morula	1	2.79018
chr2	135808861	135810061	RAB3GAP1	Morula	1	4.33498
chr9	136215948	136217148	RPL7A	Morula	1	2715.39
chrX	9879531	9880731	SHROOM2	Morula	0.857143	0.463602
chr18	43194440	43195640	SLC14A2	Morula	0.833333	1.52843
chr1	153933896	153935096	SLC39A1	Morula	1	21.8314
chr1	206556366	206557566	SRGAP2	Morula	0.823529	2.90954
chr16	10787787	10788987	TEKT5	Morula	0.800325	0.0126262
chr3	48600214	48601414	UCN2	Morula	1	0.0135352
chr17	5031103	5032303	USP6	Morula	0.809917	0.249559
chr10	81963247	81964447	ANXA11	TE	1	41.4104
chr1	161192418	161193618	APOA2	TE	1	0
chr12	105626183	105627383	APPL2	TE	1	3.47881
chr15	45009041	45010241	B2M	TE	1	6.07977
chr16	85774306	85775506	C16orf74	TE	0.863636	2.89509
chr2	27798388	27799588	C2orf16	TE	1	0
chr11	32815204	32816404	CCDC73	TE	1	9.87673
chr7	80274761	80275961	CD36	TE	1	0.0439395
chr18	58999662	59000862	CDH20	TE	1	0
chr17	20482036	20483236	CDRT15L2	TE	1	0
chr7	132718675	132719875	CHCHD3	TE	1	148.198
chr12	7901137	7902337	CLEC4C	TE	1	0.0308856
chrX	120070012	120071212	CT47A11	TE	0.857143	0.206162
chr11	65646307	65647507	CTSW	TE	1	0
chr13	46188874	46190074	FAM194B	TE	1	0
chr1	89737543	89738743	GBP5	TE	0.833333	0.785214
chr7	27654592	27655792	HIBADH	TE	1	7.29473
chr21	44984062	44985262	HSF2BP	TE	0.84456	3.15544
chr19	46626945	46628145	IGFL3	TE	1	0
chr15	81588310	81589510	IL16	TE	1	0.000508634
chr15	64672640	64673840	KIAA0101	TE	1	38.989
chr7	100662361	100663561	MUC17	TE	1	0
chr14	73929348	73930548	NUMB	TE	1	5.00246
chr17	16184327	16185527	PIGL	TE	1	4.85453
chr9	130209916	130211116	RPL12	TE	1	2721.53
chr9	136215948	136217148	RPL7A	TE	1	2529.78
chr1	16762919	16764119	SPATA21	TE	1	0
chr8	23711319	23712519	STC1	TE	0.888889	0
chr7	141489016	141490216	TAS2R5	TE	1	0.101454
chr1	179836975	179838175	TOR1AIP2	TE	1	8.62133
chr7	70771659	70772859	WBSCR17	TE	1	0.242103
chr11	123600693	123601893	ZNF202	TE	0.833333	3.70608
chr4	74346461	74347661	AFM	Zygote	1	0
chr21	45335668	45336868	AGPAT3	Zygote	0.888889	7.48421
chr1	115237239	115238439	AMPD1	Zygote	1	0
chr12	101187553	101188753	ANO4	Zygote	0.8125	1.57147
chr20	37229451	37230651	ARHGAP40	Zygote	0.802139	0.965381
chr14	94413648	94414848	ASB2	Zygote	0.909091	1.11005
chrX	152800579	152801779	ATP2B3	Zygote	0.848485	0
chr1	220262130	220263330	BPNT1	Zygote	0.833333	3.29623
chr16	85774306	85775506	C16orf74	Zygote	1	29.766
chr1	150244201	150245401	C1orf54	Zygote	0.859649	0.214976
chr19	6719661	6720861	C3	Zygote	1	0.0417161
chr5	179071047	179072247	C5orf60	Zygote	1	0.65294
chr8	11224910	11226110	C8orf12	Zygote	1	102.282
chr22	39965757	39966957	CACNA1I	Zygote	0.804444	0.0955037
chr9	131621811	131623011	CCBL1	Zygote	1	0.573662
chr3	122101078	122102278	CCDC58	Zygote	0.833333	0.796999
chr7	80274761	80275961	CD36	Zygote	1	63.1575
chr20	60173816	60175016	CDH4	Zygote	0.833333	0.718792
chr12	51739463	51740663	CELA1	Zygote	1	1.59376
chrX	49778205	49779405	CLCN5	Zygote	1	20.6301
chr19	14692895	14694095	CLEC17A	Zygote	0.870647	0
chr7	129931973	129933173	CPA4	Zygote	0.814286	0.0216373
chr13	95130936	95132136	DCT	Zygote	0.84264	98.1269
chr1	46971670	46972870	DMBX1	Zygote	1	0
chr19	10927172	10928372	DNM2	Zygote	0.846684	1.30395
chr1	1274088	1275288	DVL1	Zygote	0.858586	5.11059
chr17	7479128	7480328	EIF4A1	Zygote	0.923077	10.8389
chr9	19032207	19033407	FAM154A	Zygote	0.9	57.2739
chr7	100186235	100187435	FBXO24	Zygote	1	0.173905
chr8	21899263	21900463	FGF17	Zygote	1	0.167171
chr19	36023357	36024557	GAPDHS	Zygote	0.857143	0
chr21	44984062	44985262	HSF2BP	Zygote	0.940341	123.23
chr11	125752508	125753708	HYLS1	Zygote	0.857143	222.05
chr12	56105089	56106289	ITGA7	Zygote	1	0.0103886
chr1	10289821	10291021	KIF1B	Zygote	1	8.88511
chr1	245396819	245398019	KIF26B	Zygote	0.807175	13.552
chr1	32572656	32573856	KPNA6	Zygote	0.85	29.584
chr12	52778436	52779636	KRT84	Zygote	1	0
chr5	169723781	169724981	LCP2	Zygote	0.833333	1.57261
chr19	49519348	49520548	LHB	Zygote	1	0.101893
chr17	38181662	38182862	MED24	Zygote	0.857143	4.83664
chr12	56847441	56848641	MIP	Zygote	1	0.229135
chr20	33577275	33578475	MYH7B	Zygote	0.829384	0.0817394
chr11	71724336	71725536	NUMA1	Zygote	0.8125	2.55077
chr20	44053149	44054349	PIGT	Zygote	0.822254	1.82365
chr3	138425463	138426663	PIK3CB	Zygote	0.875	2.05875
chr10	102088985	102090185	PKD2L1	Zygote	1	0
chr19	43689688	43690888	PSG5	Zygote	0.833333	0
chr6	42882726	42883926	PTCRA	Zygote	0.833333	0
chr11	112140471	112141671	PTS	Zygote	1	8.90392
chr1	156029950	156031150	RAB25	Zygote	0.833333	4.81074
chr11	14385052	14386252	RRAS2	Zygote	0.894737	61.5462
chr5	9053007	9054207	SEMA5A	Zygote	1	1.75963
chrX	9879531	9880731	SHROOM2	Zygote	0.857143	9.79239
chr1	113464971	113466171	SLC16A1	Zygote	0.868687	19.6633
chr17	74048737	74049937	SRP68	Zygote	1	56.593
chr1	54701115	54702315	SSBP3	Zygote	0.869565	41.3228
chr17	74638839	74640039	ST6GALNAC1	Zygote	1	0
chr11	9684623	9685823	SWAP70	Zygote	0.809524	28.3981
chr6	158437124	158438324	SYNJ2	Zygote	0.909091	17.1295
chr7	45143081	45144281	TBRG4	Zygote	1	2.36817
chr15	81665554	81666754	TMC3	Zygote	1	3.54522
chr9	123688074	123689274	TRAF1	Zygote	1	0.564455
chr3	48600214	48601414	UCN2	Zygote	1	0
chr3	11609272	11610472	VGLL4	Zygote	0.879371	39.031
chr14	64966171	64967371	ZBTB25	Zygote	1	0.0312441
