# Supplementary material for: A DNA methylation haplotype block landscape in human tissues and preimplantation embryos reveals regulatory elements defined by comethylation patterns
Source: HighWire-hosted journal article supplement (doi:10.1101/gr.278146.123), 2023-11-08
Supplement: Supplemental_Table_S8.xlsx [file Supplemental_Table_S8.xlsx]

## Sheet: README
Supplemental Table S8: Stage-specific genes in human early embryos.
Column names	Description
Gene	Gene symbol
stage	Assignment of tissue-specific genes
Oocyte	Gene expression levels
Zygote
2-cell
4-cell
8-cell
Morula
ICM
TE
High methylation with MHB	Whether the promoter of this gene is highly methylated and overlap with MHBs

## Sheet: table S8
Gene	stage	Oocyte	Zygote	2-cell	4-cell	8-cell	Morula	ICM	TE	High methylation with MHB
MARCH4	Oocyte	25.2233	13.8412	14.0348	13.9039	1.6971	0.0994541	0	0.00220993	NA
MARCH8	8-cell	1.64162	2.9314	2.76292	6.97455	31.4174	19.1012	0.615191	1.2512	NA
MARCH8	Morula	1.64162	2.9314	2.76292	6.97455	31.4174	19.1012	0.615191	1.2512	NA
SEP15	Blastocytes	76.6622	44.8181	31.5632	65.748	36.1859	73.0166	143.121	142.738	NA
A1BG	8-cell	0.149105	0.165124	0.207942	0.0355613	4.19327	2.44062	0	0.10735	NA
A1CF	Oocyte	24.7394	8.12589	5.71209	14.0616	3.70649	1.60665	0	0.00474709	NA
A2LD1	Oocyte	196.133	169.065	86.2994	88.1101	40.0222	4.40501	2.08775	5.06417	NA
A4GALT	Blastocytes	1.06302	7.14735	9.9231	7.16902	8.32288	29.6231	41.519	33.1208	NA
AARS	Blastocytes	0.672755	5.69859	2.59562	8.64557	3.99715	12.7221	22.6375	25.7192	NA
AARSD1	Morula	3.17272	2.4419	1.13607	2.6029	9.35346	20.4234	12.1652	17.722	NA
ABCB10	Blastocytes	0.418463	0.752981	0.210748	0.241648	0.405821	2.8123	4.14911	13.0692	NA
ABCC5	Morula	5.85877	5.02792	3.14281	6.56676	5.72883	21.6135	5.28035	4.44374	NA
ABCC9	8-cell	0.0217905	0.0928214	0.0900579	0.261347	1.20493	3.30978	1.23855	0.724313	NA
ABCD4	Oocyte	78.9807	29.6734	22.5787	35.2816	10.7926	6.14869	11.5261	2.66616	NA
ABCE1	Blastocytes	16.1469	25.319	17.4905	18.8491	24.5326	19.7564	46.3046	53.9701	NA
ABCF1	8-cell	31.4546	36.3893	46.741	65.2417	173.235	187.048	28.5973	31.4261	NA
ABCF1	Morula	31.4546	36.3893	46.741	65.2417	173.235	187.048	28.5973	31.4261	NA
ABCF2	8-cell	23.8919	17.0968	12.7877	22.8304	205.975	167.047	31.255	38.7582	NA
ABCF2	Morula	23.8919	17.0968	12.7877	22.8304	205.975	167.047	31.255	38.7582	NA
ABCG2	Blastocytes	0.862282	0.217341	0.139905	1.55877	0.314572	0.0446185	15.4722	63.3629	NA
ABCG4	Oocyte	3.48886	1.58055	2.15132	1.85473	0.296543	0.0833995	0	0	NA
ABHD11	Blastocytes	0.858582	1.40709	1.08771	2.91337	8.38713	9.43036	6.4245	21.7322	NA
ABHD12	Blastocytes	4.72575	6.87432	5.01159	9.24104	9.21978	7.36412	34.9293	46.8453	NA
ABHD15	Morula	0.120468	0.167871	0.0870015	0.330883	2.21396	7.48819	7.73423	3.56635	NA
ABHD2	4-cell	11.5336	25.0257	14.8855	30.2689	5.10517	3.04965	2.25137	3.20526	NA
ABHD2	Zygote	11.5336	25.0257	14.8855	30.2689	5.10517	3.04965	2.25137	3.20526	NA
ABL1	Oocyte	33.962	16.4178	14.0482	19.9321	5.88247	6.35444	2.67787	3.26726	NA
ABR	4-cell	4.07363	5.94686	6.649	19.4611	5.22154	1.97223	22.1354	7.25095	Yes
ABT1	8-cell	0.316963	0.282099	0.121479	0.851858	60.2138	67.0834	26.4549	30.8115	NA
ABT1	Morula	0.316963	0.282099	0.121479	0.851858	60.2138	67.0834	26.4549	30.8115	NA
ACAA2	Blastocytes	14.9025	34.061	25.0873	32.8899	18.7031	28.2181	229.913	141.559	NA
ACAD11	Oocyte	51.5486	24.8127	21.2696	34.9279	6.46846	2.20579	0.0155528	0.19125	NA
ACADM	Blastocytes	0.585583	1.02805	0.42874	1.34148	0.00496657	0.234454	24.5307	23.1698	NA
ACAT1	Oocyte	73.2962	32.0122	18.6914	23.4176	16.1907	18.6171	19.5718	31.4472	NA
ACAT2	Blastocytes	48.5946	39.4539	27.7426	69.6909	26.9132	12.824	96.2442	301.373	NA
ACBD5	8-cell	0.528782	0.0772602	0.195675	0.909012	18.9896	16.4954	1.90882	1.35541	NA
ACBD5	Morula	0.528782	0.0772602	0.195675	0.909012	18.9896	16.4954	1.90882	1.35541	NA
ACCSL	4-cell	243.733	223.088	372.194	760.474	43.453	5.11943	0	0.0386328	NA
ACER2	8-cell	0.151524	0.364982	0.13459	0.326402	15.7286	9.82014	5.50023	0.0582651	NA
ACER2	Morula	0.151524	0.364982	0.13459	0.326402	15.7286	9.82014	5.50023	0.0582651	NA
ACN9	Morula	10.4142	7.66191	4.11929	10.1722	11.2653	28.576	20.6204	20.5885	NA
ACO2	4-cell	2.34327	6.78696	4.72923	17.5253	10.071	10.1433	8.77448	16.562	NA
ACOT1	Oocyte	27.82	14.0786	4.50947	7.60987	3.56921	4.44476	0.329678	2.11471	NA
ACOT11	8-cell	0.0199152	0.104492	0.088136	0.103111	78.857	130.336	40.1568	21.2188	NA
ACOT11	Morula	0.0199152	0.104492	0.088136	0.103111	78.857	130.336	40.1568	21.2188	NA
ACOT13	Oocyte	15.2653	7.22038	5.62729	4.03949	5.94836	6.93755	11.452	9.90905	NA
ACOT2	Oocyte	30.8942	16.0308	7.69723	9.52066	5.30983	7.64554	0.321856	2.47642	NA
ACOX1	Blastocytes	0.888576	1.77458	1.01157	1.45926	1.21861	1.68381	5.55637	16.5583	NA
ACSL3	Blastocytes	72.1146	42.5128	15.2569	9.9155	25.6451	57.7882	87.9993	96.7482	NA
ACSS3	Zygote	1.36783	2.82578	1.08428	4.34216	0.306886	0.0297906	0	0	NA
ACTA1	Blastocytes	0.0373182	0	0.00898002	0.143669	3.6642	1.70632	2.97123	4.62169	NA
ACTB	Blastocytes	181.896	108.626	167.318	245.482	410.422	421.966	4716.17	9163.25	NA
ACTL8	2-cell	1093.03	871.155	1851.65	1402.41	690.974	71.9452	0.0586784	0.140828	NA
ACTN4	Blastocytes	6.64133	6.02559	6.65227	8.13804	8.02073	14.8249	52.9251	62.3698	NA
ACTR1A	Blastocytes	2.05755	5.90305	4.83499	3.84353	9.0359	11.3134	20.9184	28.5366	NA
ACTR3	Blastocytes	23.6091	57.5436	44.0374	33.4742	30.0429	58.7318	71.7123	90.7835	NA
ACTR5	8-cell	1.39029	7.50188	4.22394	8.08911	15.4134	8.50384	1.53669	3.86549	NA
ACVR2B	Oocyte	22.6182	17.5421	12.7126	9.47555	3.28714	4.12116	6.51797	2.87598	NA
ADA	4-cell	16.7308	32.2833	25.0789	60.5311	22.2253	4.2517	5.23631	33.1745	NA
ADAM19	Zygote	10.8589	19.3108	14.7	14.2119	2.06191	2.96179	0.140809	0.876648	NA
ADAM9	Blastocytes	0.668299	1.13614	0.906521	1.11999	6.4866	8.73529	11.392	29.3391	NA
ADAMTS17	4-cell	1.42143	3.18692	2.277	5.18381	1.48894	0.273405	0.0175672	0.193007	NA
ADAMTS18	Oocyte	5.92589	3.45617	1.74413	1.6832	0.410999	0.334127	0	0.00262444	NA
ADAMTS9	4-cell	8.67637	17.3009	12.3957	21.7075	3.46473	2.79964	0	0.253023	NA
ADAMTS9	Zygote	8.67637	17.3009	12.3957	21.7075	3.46473	2.79964	0	0.253023	NA
ADAMTSL1	4-cell	4.91294	7.16963	5.13677	12.7409	1.69931	0.0656637	0	0.00144459	NA
ADAP2	8-cell	0	0	0.0052153	0.300602	4.22299	4.62808	0.117275	0.188614	NA
ADARB2	Zygote	0.779056	3.24307	0.650766	1.08942	0.122591	0.05818	0	0	NA
ADAT1	Oocyte	94.4955	58.6503	48.1711	39.052	21.3596	16.6158	6.85382	11.7313	NA
ADC	Oocyte	12.0325	3.4518	2.55858	7.60862	3.56639	1.36678	0	0.00112292	NA
ADCK2	Blastocytes	2.24626	6.01707	5.65333	8.37543	4.58958	9.84093	18.9112	19.3835	NA
ADCY5	4-cell	5.28054	11.9834	9.27834	25.6159	8.10357	2.07135	0	0.00274204	NA
ADCY9	4-cell	3.31535	11.8789	8.37447	13.6228	4.15613	1.91104	0.0292154	0.545401	NA
ADCY9	Zygote	3.31535	11.8789	8.37447	13.6228	4.15613	1.91104	0.0292154	0.545401	NA
ADD1	Oocyte	37.9693	20.475	15.7075	17.836	4.5021	6.02758	9.94222	20.6817	NA
ADD2	4-cell	3.28885	5.47464	3.7306	9.7567	0.660008	0.88076	0.168448	0.000954259	NA
ADH5	Oocyte	129.136	66.9844	54.1067	75.9583	11.3967	9.49303	54.9166	34.593	NA
ADI1	Blastocytes	26.0116	11.2585	8.12773	7.97118	5.30794	7.47003	70.9947	111.26	NA
ADI1	Oocyte	26.0116	11.2585	8.12773	7.97118	5.30794	7.47003	70.9947	111.26	NA
ADIPOR1	8-cell	30.6027	15.7983	7.29341	12.515	76.2264	41.9909	50.4162	45.0552	NA
ADK	Oocyte	28.394	17.7507	11.2311	18.9998	3.41201	1.72939	23.0721	57.427	NA
ADM	Morula	0	0.0156077	0.0701943	1.79904	7.95204	227.497	33.9218	24.0658	NA
ADNP2	8-cell	22.1212	15.3655	8.94408	17.9664	37.2991	19.7382	3.88053	4.765	NA
ADPGK	Oocyte	163.278	95.957	104.76	112.908	25.4651	11.1238	6.29385	16.2586	NA
ADRA2B	Oocyte	7.96216	2.59201	3.31733	6.39009	0.213443	0	0	0	NA
ADRBK1	4-cell	2.04221	7.07125	4.75566	13.282	2.6279	2.92274	0.794223	3.0926	NA
ADRM1	Blastocytes	38.4086	22.5646	26.2971	75.3624	60.559	48.5037	73.685	97.7292	NA
ADSL	Blastocytes	41.3267	26.2679	22.7122	45.7875	43.8924	75.8249	170.12	134.475	NA
AEBP2	8-cell	0.871553	1.35449	0.744072	2.49835	10.8932	7.94149	9.81796	4.87928	NA
AES	Morula	0.0264107	0.077125	0.00777317	0.369011	12.7991	27.8203	1.30057	1.92548	NA
AFAP1	4-cell	10.1615	13.6992	9.70074	16.0107	2.836	3.10483	3.32422	3.46782	NA
AFAP1AS	4-cell	8.03993	11.5558	7.55962	24.2656	8.93274	0.866515	0.1639	0.291724	NA
AFF1	4-cell	3.6183	16.0329	10.9533	18.0567	9.79987	3.9948	6.11923	1.28133	NA
AFF3	4-cell	1.20755	1.81695	1.28067	3.48588	0.762889	0.700072	0.0287609	0.0280509	NA
AFG3L2	Blastocytes	4.25032	15.111	6.58176	13.5355	12.1204	14.6986	32.8438	45.8665	NA
AFMID	8-cell	0.388447	0.446137	0.59748	0.806409	13.3838	27.2371	2.18753	5.60009	NA
AFTPH	8-cell	0.796865	0.633489	0.339045	0.521005	41.9024	49.0938	62.7485	14.7439	NA
AFTPH	Morula	0.796865	0.633489	0.339045	0.521005	41.9024	49.0938	62.7485	14.7439	NA
AGAP3	4-cell	2.41149	3.58093	3.21041	8.00648	2.47792	3.1918	2.56831	5.63642	NA
AGAP5	Morula	0.0849162	0.0167507	0.0258375	0.234454	0.784125	2.94205	0.0319553	1.61123	NA
AGAP6	Morula	0.321201	0.121808	0.0261794	0.363762	2.36464	5.7927	0.285184	3.72004	NA
AGAP7	Morula	0.182959	0.0481489	0.00887432	0.309069	0.861541	2.05039	0.113792	1.64385	NA
AGAP8	Morula	0.625929	0.073609	0.0116759	0.236839	1.24935	2.83144	0.117214	1.47185	NA
AGAP9	Morula	0.0666407	0.0395645	0.0262621	0.14764	0.680215	1.58403	0.121703	1.75809	NA
AGGF1	Oocyte	34.8366	24.8653	16.2373	16.7546	6.25959	12.0441	12.614	9.2373	NA
AGL	Blastocytes	0.619219	0.633783	0.365032	0.615481	4.37194	10.4291	88.5807	49.3735	NA
AGPAT4	4-cell	1.26827	4.58324	3.33466	6.96982	1.08255	0.268064	0.032626	0.0021133	NA
AGTPBP1	4-cell	2.16486	3.81834	2.75868	8.68856	3.04017	5.32362	0.863136	3.43621	NA
AHCTF1	8-cell	9.82567	10.9917	8.1437	9.17575	38.6145	18.4997	2.28249	10.5653	NA
AHCYL1	Blastocytes	16.1234	14.7086	9.19197	5.85949	28.0087	7.86802	66.5394	71.9736	NA
AHCYL2	4-cell	1.45501	2.80589	2.47065	8.24371	2.044	3.7391	0.384465	0.526804	NA
AHNAK	Blastocytes	0	0.00215905	0.000324377	0.0907984	0.101913	1.4185	5.86598	11.4916	NA
AHSA1	4-cell	324.082	127.39	175.905	293.153	136.529	72.1499	174.496	117.044	NA
AHSA1	Oocyte	324.082	127.39	175.905	293.153	136.529	72.1499	174.496	117.044	NA
AIF1L	Blastocytes	0.178055	0.401693	0.462182	1.58668	3.85628	16.8341	65.7309	51.5247	NA
AIF1L	Morula	0.178055	0.401693	0.462182	1.58668	3.85628	16.8341	65.7309	51.5247	NA
AIFM1	4-cell	8.18361	31.112	32.641	65.4985	20.8112	12.1508	14.4526	28.3252	NA
AIMP1	Blastocytes	1.82256	1.80641	1.79626	2.64848	5.11266	10.0492	80.232	76.278	NA
AIMP2	4-cell	175.957	82.915	91.0119	143.462	20.8682	16.7414	48.903	46.3474	NA
AIMP2	Oocyte	175.957	82.915	91.0119	143.462	20.8682	16.7414	48.903	46.3474	NA
AK2	Blastocytes	10.4553	11.5021	9.49225	9.51416	13.2564	31.4485	30.1054	56.6475	NA
AK4	Blastocytes	5.29499	6.83758	6.81452	10.8749	6.49582	38.7168	225.394	209.143	NA
AKAP12	Blastocytes	0.0139337	0.0026821	0.0103995	0.156729	2.11183	15.7459	109.145	21.7691	NA
AKAP12	Morula	0.0139337	0.0026821	0.0103995	0.156729	2.11183	15.7459	109.145	21.7691	NA
AKAP8	8-cell	4.79003	3.69354	2.32104	5.96618	85.9393	56.3247	7.23114	15.8591	NA
AKAP8	Morula	4.79003	3.69354	2.32104	5.96618	85.9393	56.3247	7.23114	15.8591	NA
AKD1	Zygote	9.08832	12.6342	9.1579	8.48672	1.52639	0.605283	0.0313017	0.00773143	NA
AKIRIN2	Oocyte	315.028	232.966	176.855	178.038	79.8935	31.5136	54.0833	17.5183	NA
AKR1A1	Blastocytes	3.81913	9.11525	6.33798	16.3921	8.90105	23.4822	67.7893	128.307	NA
AKR1C2	4-cell	5.18324	1.66078	2.49767	10.8015	6.44414	1.35515	0	0.00308256	NA
AKR1C3	4-cell	121.413	60.8775	78.23	233.982	152.867	36.8029	0	0.0132338	NA
AKT1	4-cell	31.2983	15.3429	12.3682	36.3713	7.47185	0.744956	1.47511	10.4569	NA
ALAD	Blastocytes	1.33622	1.97005	1.50501	1.58723	6.03192	28.2169	9.37868	47.5037	NA
ALAD	Morula	1.33622	1.97005	1.50501	1.58723	6.03192	28.2169	9.37868	47.5037	NA
ALAS1	2-cell	312.775	194.612	284.412	204.159	13.84	22.3738	7.07891	16.4644	NA
ALDH16A1	Blastocytes	0.0559097	0.0130823	0.00627474	0.0330372	1.38746	1.54538	9.80169	7.03545	NA
ALDH1A2	Oocyte	69.9253	38.337	22.8572	40.2983	9.49134	0.114279	0.00806351	0.107211	NA
ALDH9A1	4-cell	90.2473	67.6608	69.9372	119.202	37.7447	27.003	1.90522	13.2666	NA
ALDOC	8-cell	0.0101015	0	0	0.0147411	11.2805	1.33333	2.33069	0.153582	NA
ALG1L2	4-cell	0.823158	3.96683	3.36368	8.26011	5.33408	4.10852	0.603778	0.15999	NA
ALG5	Blastocytes	0.296098	0.672616	0.507288	0.128748	38.6205	66.6133	66.6488	117.162	NA
ALKBH8	8-cell	0.230219	0.282005	0.0744622	0.0699131	8.22974	3.92263	8.99202	6.06119	NA
ALMS1	4-cell	21.7055	15.1217	13.9519	25.8584	7.73867	3.25279	2.51154	1.58543	NA
ALOX15	Oocyte	107.809	53.0813	41.45	58.4581	12.7778	2.6905	0.0147938	0.0073154	NA
ALOXE3	4-cell	7.05276	13.8384	11.0217	24.7534	4.90279	0.176584	0	0.00512879	NA
ALPL	Blastocytes	0.0128459	0.0435751	0.0182737	0.032081	0.651957	12.8306	98.2607	108.248	NA
ALPL	Morula	0.0128459	0.0435751	0.0182737	0.032081	0.651957	12.8306	98.2607	108.248	NA
ALPP	Blastocytes	0.0610468	0	0.0282407	0.150516	0.926611	0.427628	4.31415	80.6269	NA
ALPPL2	8-cell	0	0	0	1.21835	233.09	148.109	28.432	85.3035	NA
ALS2CR11	2-cell	0.339953	0.795635	2.94964	1.8736	1.20352	1.11005	0.00251946	0.000429439	NA
AMOTL2	Blastocytes	0.0355882	0.0163003	0	0.0130307	0.0405396	1.46461	37.5601	26.3755	NA
AMPH	4-cell	5.60303	9.14691	7.88933	19.6112	3.90918	4.09873	0	0	NA
ANAPC1	4-cell	26.8712	16.1619	12.0776	28.3081	15.8009	6.6006	19.4784	15.7237	NA
ANAPC11	Blastocytes	128.427	30.3188	38.3174	51.2075	61.9081	42.8183	117.119	110.221	NA
ANAPC5	Blastocytes	12.3389	8.56763	4.87965	7.94856	22.4891	49.8148	50.4042	78.9185	NA
ANAPC7	4-cell	5.00494	27.6988	18.4131	32.8584	11.6308	18.7843	22.1723	21.3488	NA
ANKH	Oocyte	10.6705	7.79542	5.55037	10.182	3.18463	1.00226	1.10374	1.8405	NA
ANKHD1	8-cell	0.352579	0.369265	0.263618	0.249075	12.4088	9.77576	4.3144	6.10615	NA
ANKHD1	Morula	0.352579	0.369265	0.263618	0.249075	12.4088	9.77576	4.3144	6.10615	NA
ANKHD1-EIF4EBP3	8-cell	0.345544	0.264091	0.18195	0.346111	7.37396	6.01464	1.93173	2.94899	NA
ANKHD1-EIF4EBP3	Morula	0.345544	0.264091	0.18195	0.346111	7.37396	6.01464	1.93173	2.94899	NA
ANKRD12	8-cell	4.71537	5.25401	2.64631	2.8582	11.8312	18.0086	4.2408	5.26136	NA
ANKRD13C	8-cell	0.958964	1.65185	0.944487	1.91961	5.9636	1.62648	2.02115	4.47	NA
ANKRD27	Zygote	1.23747	10.1072	6.72283	10.5368	2.21664	2.52969	0.307895	3.32445	NA
ANKRD31	Oocyte	1.20121	0.349115	0.26305	0.586031	0.181037	0.229526	0	0.000405815	NA
ANKRD32	Oocyte	86.1521	67.104	33.797	8.36413	18.7297	26.0083	5.16158	10.4503	NA
ANKRD35	8-cell	0	0	0	0.664939	10.4809	1.82678	0	0	NA
ANKRD37	Oocyte	343.522	90.6092	56.9205	35.7617	118.944	77.2303	0.653133	5.26596	NA
ANKRD45	4-cell	3.45069	7.74295	4.70305	14.1189	2.83335	7.56733	7.16218	0.195133	NA
ANKRD50	8-cell	0.569833	0.41191	0.28584	0.571255	12.0133	5.45828	1.93155	1.49975	NA
ANKRD50	Morula	0.569833	0.41191	0.28584	0.571255	12.0133	5.45828	1.93155	1.49975	NA
ANKRD54	8-cell	1.64208	1.37965	1.56352	3.32775	12.5474	7.6253	4.25696	3.86284	NA
ANKRD6	4-cell	12.1556	20.8599	14.7398	36.1911	9.06299	2.2852	1.14528	3.28831	NA
ANKS4B	4-cell	2.16692	10.2922	6.25906	20.6016	2.69826	0.639298	4.06518	0.16091	NA
ANP32E	Blastocytes	0.123368	0.908687	0.580068	1.95228	4.99381	2.66517	29.7076	21.624	NA
ANPEP	Blastocytes	0	0	0.00668986	0.0676318	0.198463	1.86176	41.0456	104.784	NA
ANUBL1	8-cell	0.831879	1.34311	1.16385	1.62259	7.44223	2.36288	0.429874	0.684145	NA
ANXA2	Blastocytes	0.0716598	0.25057	0.209926	1.76816	20.1722	35.5462	829.444	1206.61	NA
ANXA2P1	Blastocytes	0	0	0	0.0114939	0.019426	0.0417956	1.99263	4.04383	NA
ANXA2P2	Blastocytes	0.100543	0.175943	0.158304	0.747566	1.38748	2.26642	63.7639	101.63	NA
ANXA3	Blastocytes	0	0	0	0.0902378	0.480096	0.579263	95.5212	175.012	NA
ANXA5	Blastocytes	10.0696	10.9478	3.10702	13.3482	53.5178	116.188	73.8238	193.809	NA
ANXA5	Morula	10.0696	10.9478	3.10702	13.3482	53.5178	116.188	73.8238	193.809	NA
ANXA6	Blastocytes	0.280375	1.14969	1.1109	1.903	0.34717	0.541429	1.55998	11.6334	NA
ANXA7	2-cell	505.182	436.247	628.385	318.318	22.0678	34.4457	68.5679	84.3422	NA
AP1B1	Blastocytes	0.359884	1.17418	0.932522	1.43159	3.63431	4.55712	16.0756	9.70569	NA
AP1G1	8-cell	3.11717	8.98795	6.18028	7.22799	33.4727	22.6451	8.20765	9.15123	NA
AP1M1	4-cell	24.2815	28.4942	25.9594	75.1722	19.9507	12.5808	46.9132	6.59454	NA
AP1M2	Oocyte	116.028	47.4953	41.7303	66.0088	19.4922	11.2077	50.5455	18.3127	NA
AP1S2	8-cell	0.0919007	0.126538	0.173686	0.196153	5.85427	0.872859	1.03663	0.417923	NA
AP1S3	Morula	1.01413	2.0509	1.16416	0.749255	0.839526	5.17057	0.513358	0.988014	NA
AP2B1	4-cell	9.38436	18.887	24.946	41.975	14.4389	18.0688	19.986	21.4542	NA
AP2M1	Blastocytes	7.72034	26.4884	18.2613	56.8854	46.4236	114.182	171.421	185.469	NA
AP2S1	Blastocytes	10.7151	10.566	6.30176	13.6251	45.2271	95.2815	59.4827	78.2809	NA
AP3B2	4-cell	1.38823	3.18606	2.53035	8.74922	1.08124	0.595779	0	0	NA
AP3D1	Blastocytes	16.6481	14.309	12.2896	19.9732	6.38486	13.5385	58.3224	49.7386	NA
AP3S2	Morula	0.486346	1.51931	1.3074	3.54577	3.53446	6.77046	4.75028	7.96906	NA
AP4M1	8-cell	0.44491	0.678319	0.253259	0.114182	68.0449	34.3521	6.76965	6.11497	NA
AP4M1	Morula	0.44491	0.678319	0.253259	0.114182	68.0449	34.3521	6.76965	6.11497	NA
APBA1	4-cell	0.410295	4.20375	2.258	6.40665	0.723093	0	0	0	NA
APEH	Blastocytes	0.445389	1.14807	0.479718	1.00542	2.18938	11.7529	58.4976	33.68	NA
APEH	Morula	0.445389	1.14807	0.479718	1.00542	2.18938	11.7529	58.4976	33.68	NA
APEX1	Blastocytes	79.6035	52.9835	41.015	101.503	146.188	207.706	331.349	231.296	NA
APH1A	4-cell	113.814	36.6046	69.5042	108.645	33.2831	7.65495	12.1307	23.5046	NA
APH1A	Oocyte	113.814	36.6046	69.5042	108.645	33.2831	7.65495	12.1307	23.5046	NA
API5	8-cell	19.3996	25.2789	20.0651	26.9698	62.1296	24.837	9.67867	23.1894	NA
APLP2	Blastocytes	25.7796	40.8498	33.0078	33.8517	46.954	57.1989	137.41	134.703	NA
APOA1BP	Blastocytes	2.12564	4.3543	2.51373	8.62629	1.49131	5.52959	11.5324	35.6995	NA
APOB48R	Morula	0	0	0.00389896	0.275449	1.54549	4.16614	0.00538194	0.000686586	NA
APOBEC3A	Morula	0.476854	0.831924	0.993595	1.06482	4.11621	7.65638	3.96099	4.35344	NA
APOC1	Blastocytes	6.46928	2.87747	5.23023	8.50985	3.94111	31.4854	796.803	142.701	NA
APOC1P1	Blastocytes	0.0859337	0.0740359	0.177191	0.295691	2.02186	8.27484	52.3745	10.7828	NA
APOC1P1	Morula	0.0859337	0.0740359	0.177191	0.295691	2.02186	8.27484	52.3745	10.7828	NA
APOL1	8-cell	0.555808	0.509048	0.656674	0.974542	4.14643	6.61306	3.30386	6.3551	NA
APOL1	Morula	0.555808	0.509048	0.656674	0.974542	4.14643	6.61306	3.30386	6.3551	NA
APOL4	Morula	0.113177	0.172586	0.563224	0.408308	1.4815	2.18175	0.585813	0.333435	NA
APRT	Blastocytes	1.31835	1.13827	1.98482	1.74784	3.50732	16.3395	158.938	205.974	NA
AQP3	Blastocytes	0.0221206	0	0.0130376	0.147446	1.18423	5.20263	28.6577	45.6727	NA
AQP6	8-cell	0.153692	0.294603	0.344964	0.327426	1.84027	1.14863	1.21329	1.13092	NA
ARAF	4-cell	0.189976	1.8429	1.81233	5.02509	1.71203	1.31141	1.34909	4.87073	NA
ARF1	8-cell	327.709	221.677	252.603	231.412	397.217	221.544	312.239	329.809	NA
ARF4	Blastocytes	66.946	53.3554	30.2254	30.5751	113.168	139.196	282.498	329.629	NA
ARF6	8-cell	3.76475	11.7786	8.46099	3.39944	32.5109	21.328	16.7442	23.9537	NA
ARFIP2	Blastocytes	2.9258	2.61003	2.20881	2.4229	8.31003	7.76889	34.8565	38.0954	NA
ARG2	4-cell	122.065	177.094	240.564	275.154	98.9703	19.947	14.567	9.44837	NA
ARGFX	8-cell	0.0479303	0.0803428	0.074605	0.210695	125.552	209.377	22.8769	1.54235	NA
ARGFX	Morula	0.0479303	0.0803428	0.074605	0.210695	125.552	209.377	22.8769	1.54235	NA
ARGLU1	8-cell	1.22833	1.58549	0.722823	0.990636	59.1763	50.3287	46.4029	20.4703	NA
ARGLU1	Morula	1.22833	1.58549	0.722823	0.990636	59.1763	50.3287	46.4029	20.4703	NA
ARHGAP11A	8-cell	11.3314	16.5273	10.1105	18.7527	43.0759	18.9285	17.8784	17.7547	NA
ARHGAP11B	8-cell	1.9973	2.8071	1.82076	5.51822	15.7914	7.6266	3.02732	3.26358	NA
ARHGAP15	4-cell	6.61967	7.08572	4.96419	16.4729	2.47517	0.278667	0	0.0419911	NA
ARHGAP19	Oocyte	41.2504	27.7281	19.8798	22.6795	12.529	8.5543	13.5801	6.20309	NA
ARHGAP22	Zygote	0.395337	1.29074	0.501767	1.95446	0.115607	0.0159887	0	0.328961	NA
ARHGAP26	4-cell	9.75528	14.0379	8.77293	18.362	3.48852	2.654	0.788943	0.587614	NA
ARHGAP26	Zygote	9.75528	14.0379	8.77293	18.362	3.48852	2.654	0.788943	0.587614	NA
ARHGAP5	8-cell	3.12054	5.28456	3.7609	7.89565	15.2552	28.8085	16.6795	9.87013	NA
ARHGAP8	Blastocytes	2.2511	3.38644	3.07182	10.5128	4.26777	8.22922	62.989	55.8217	NA
ARHGEF12	Zygote	11.5471	17.361	11.6559	14.1945	5.13954	4.75213	4.16682	2.57794	NA
ARHGEF18	8-cell	0.484329	0.795296	0.630178	0.772036	6.03695	5.74721	7.80169	1.24908	NA
ARHGEF33	Zygote	1.9558	3.53089	1.99064	1.33191	0.79272	0.180757	0	0	NA
ARID3A	Blastocytes	0.289846	0.195172	0.183958	0.0385906	4.28738	16.5276	9.46516	20.9113	NA
ARID3A	Morula	0.289846	0.195172	0.183958	0.0385906	4.28738	16.5276	9.46516	20.9113	NA
ARID3B	4-cell	21.9087	36.5977	26.3213	37.9323	26.2693	20.0946	7.13861	10.7309	NA
ARIH1	2-cell	39.8788	74.113	70.7578	59.8911	32.3565	12.8109	8.37167	11.7465	NA
ARL17A	Morula	0.668962	1.27825	0.730864	1.98269	14.8916	9.85165	3.13335	2.0943	NA
ARL17B	Morula	1.30517	1.24399	0.795857	3.36016	13.0995	14.4883	2.40918	3.79361	NA
ARL2	Blastocytes	0.901662	3.91483	3.23406	5.96113	4.26033	4.6004	19.4583	33.8562	NA
ARL4D	8-cell	54.3356	73.1175	43.1423	70.9312	826.382	918.411	72.2139	49.7576	NA
ARL4D	Morula	54.3356	73.1175	43.1423	70.9312	826.382	918.411	72.2139	49.7576	NA
ARL6IP1	8-cell	83.993	121.771	114.125	145.591	378.284	206.712	235.386	174.874	NA
ARL6IP4	Blastocytes	1.5679	2.10261	1.18272	1.76305	1.30973	3.8323	37.0987	14.4861	NA
ARL6IP5	Morula	2.95023	1.21116	1.5599	2.81461	7.86674	58.63	7.75856	88.3412	NA
ARL8B	8-cell	11.6988	19.4336	15.5804	12.5577	191.087	344.249	53.4513	50.5211	NA
ARMC10	Oocyte	30.1063	22.2698	13.5513	13.3317	3.22793	7.57348	19.0232	24.9282	NA
ARMC2	2-cell	120.482	179.512	262.954	143.789	50.982	3.55882	0.506206	0.962146	NA
ARMC5	8-cell	0.00430859	0.0363039	0.0286874	0.103384	2.44594	0.434813	4.70123	0.30562	NA
ARMC7	Morula	0.570148	7.99307	3.90844	11.3104	13.7882	30.8436	6.87263	15.2686	NA
ARMC8	Oocyte	111.154	68.8999	47.6066	86.7811	26.4372	18.0333	15.7769	13.8463	NA
ARNT2	Oocyte	2.72297	1.25994	0.66439	1.68113	0.0724089	0.00325154	0	0.135794	NA
ARPC1A	Blastocytes	13.3648	12.9766	7.42826	28.0749	25.2617	48.5312	87.3409	58.476	NA
ARPC1B	Blastocytes	35.156	23.6351	10.5556	14.8201	8.76793	27.9202	65.0434	81.586	NA
ARPC2	Blastocytes	363.011	240.997	192.051	120.81	176.013	272.145	608.472	436.41	NA
ARPC3	Blastocytes	33.0862	12.9753	7.67269	10.5914	32.2367	94.1126	164.438	121.811	NA
ARPC5	Blastocytes	6.99493	14.1364	11.4607	11.7543	13.9724	33.1461	34.0593	105.142	NA
ARPP21	Oocyte	1.44152	0.645333	0.500714	0.253309	0.0931522	0.0911608	0	0	NA
ARRDC2	8-cell	0.112931	0.0923515	0.155844	0.266697	26.2274	21.6608	3.53603	0.855562	NA
ARRDC2	Morula	0.112931	0.0923515	0.155844	0.266697	26.2274	21.6608	3.53603	0.855562	NA
AS3MT	8-cell	0.394641	0.659296	0.944607	0.715618	1.71267	3.35456	1.32659	0.805205	NA
AS3MT	Morula	0.394641	0.659296	0.944607	0.715618	1.71267	3.35456	1.32659	0.805205	NA
ASAP2	4-cell	7.75952	21.6744	15.1526	20.8727	2.52676	0.645555	2.20299	5.54835	NA
ASAP2	Zygote	7.75952	21.6744	15.1526	20.8727	2.52676	0.645555	2.20299	5.54835	NA
ASB7	8-cell	0.860236	0.829688	0.321207	0.37468	7.66205	5.73637	0.801257	0.938561	NA
ASB8	Oocyte	127.652	90.5916	65.4921	78.2583	21.5971	19.5053	12.9084	15.7336	NA
ASCC1	Morula	0.876584	1.04081	0.705797	2.17344	24.6804	46.0234	24.7917	16.6623	NA
ASCC2	4-cell	2.8525	21.6069	16.7499	45.6947	19.5872	23.0135	4.6204	12.3299	NA
ASF1B	Oocyte	86.6308	28.8585	22.6018	30.6065	14.1686	12.3492	5.66556	17.7333	NA
ASH1L	Morula	4.7117	4.42833	2.99377	3.79453	9.67031	12.2642	6.97263	6.26267	NA
ASRGL1	Blastocytes	9.7615	4.94498	1.8224	7.51151	6.20008	27.7075	168.643	72.5192	NA
ASTL	4-cell	6.49282	27.3615	12.3852	40.7843	16.1732	5.99765	0	0.00189119	NA
ATAD3A	Blastocytes	1.38728	3.32216	2.73141	6.77469	3.40235	5.43765	26.8853	33.2808	NA
ATAD3B	Blastocytes	0.477189	0.775589	0.472521	1.29891	12.8574	30.4858	90.0549	57.0412	NA
ATF1	8-cell	3.64258	4.18675	2.4114	3.4357	52.263	18.1656	42.5671	36.186	NA
ATF2	4-cell	30.5723	42.1773	40.7564	84.3359	26.6819	16.0065	5.65121	3.00885	NA
ATF3	8-cell	0	0	0	1.21394	34.2744	94.8225	12.2846	29.0641	NA
ATF3	Morula	0	0	0	1.21394	34.2744	94.8225	12.2846	29.0641	NA
ATF4	Morula	21.8168	48.9522	60.431	114.598	323.48	875.525	213.776	284.41	NA
ATF7IP	8-cell	10.5918	17.2885	12.1152	16.1427	40.8111	26.4951	16.0032	12.2506	NA
ATF7IP2	4-cell	1.45506	8.99039	5.73558	11.7137	1.33864	4.40994	2.26287	4.06166	NA
ATG12	8-cell	2.53257	1.56272	0.829585	0.799925	95.1805	65.7866	21.0184	23.8171	NA
ATG12	Morula	2.53257	1.56272	0.829585	0.799925	95.1805	65.7866	21.0184	23.8171	NA
ATG13	8-cell	1.50328	7.08368	4.86953	7.0434	51.5126	35.4254	17.8333	9.59302	NA
ATG16L1	8-cell	3.9148	3.80878	3.23057	5.89428	40.9641	18.987	7.98304	11.0701	NA
ATG2A	8-cell	0.0319286	0.383067	0.212809	0.707059	22.1176	39.209	2.3861	4.34883	NA
ATG2A	Morula	0.0319286	0.383067	0.212809	0.707059	22.1176	39.209	2.3861	4.34883	NA
ATG3	Morula	14.9514	33.6951	15.4108	22.5774	371.118	737.017	419.621	209.808	NA
ATG5	Morula	18.8593	27.7755	18.7516	20.2081	139.408	158.653	103.993	36.6427	NA
ATG7	4-cell	4.87855	11.3443	6.94789	11.258	5.90567	5.59177	2.08969	8.43005	NA
ATG9A	8-cell	0.0731656	1.2556	0.927878	1.42369	38.7774	48.802	10.9485	9.46963	NA
ATG9A	Morula	0.0731656	1.2556	0.927878	1.42369	38.7774	48.802	10.9485	9.46963	NA
ATG9B	8-cell	0.0218973	0.0102702	0.0204418	0	8.63731	18.5301	6.06796	0.786918	NA
ATG9B	Morula	0.0218973	0.0102702	0.0204418	0	8.63731	18.5301	6.06796	0.786918	NA
ATIC	Blastocytes	14.7403	24.3021	20.9478	30.5161	18.1883	55.5208	67.3928	60.9456	NA
ATL2	4-cell	21.1277	25.6301	28.9949	57.7878	15.725	11.7334	9.59207	6.85973	NA
ATL3	4-cell	5.50652	28.1953	19.5525	46.811	10.7256	20.535	2.4541	10.8556	NA
ATP11A	Blastocytes	2.93449	3.5953	2.4503	3.18146	0.499216	2.50686	13.141	28.6361	NA
ATP11C	Blastocytes	1.46359	1.7109	0.875683	1.46701	3.49791	5.78363	19.3226	15.316	NA
ATP1B2	8-cell	0.0580419	0.0337471	0.0893	0.338154	9.99741	22.0615	0.952982	0.153922	NA
ATP1B2	Morula	0.0580419	0.0337471	0.0893	0.338154	9.99741	22.0615	0.952982	0.153922	NA
ATP2A2	Zygote	9.17194	28.0077	16.4362	24.6006	12.0443	5.96101	3.279	6.56018	NA
ATP5A1	Blastocytes	219.938	136.326	174.726	214.007	110.074	127.623	664.199	746.197	NA
ATP5B	Blastocytes	98.9578	129.622	187.173	193.517	131.688	65.9566	637.613	801.657	NA
ATP5C1	Blastocytes	165.018	64.6205	117.732	165.602	100.068	41.0891	324.45	389.552	NA
ATP5D	Blastocytes	1.28056	0.770661	0.768653	2.67781	1.45806	3.034	15.6173	15.4202	NA
ATP5E	Blastocytes	64.46	24.4689	9.86131	4.63017	29.7044	80.5933	361.707	170.636	NA
ATP5EP2	Blastocytes	0.953128	0.206549	0.150395	0.182544	0.473248	1.16132	7.44928	5.20621	NA
ATP5F1	Blastocytes	13.4203	15.4866	9.96508	10.9488	47.2574	103.819	245.754	385.544	NA
ATP5G1	Blastocytes	23.918	10.8111	6.71612	9.85175	3.98383	16.4063	75.3945	55.9417	NA
ATP5G3	Blastocytes	107.187	44.7877	47.6811	47.1619	29.1088	33.4935	252.256	248.597	NA
ATP5G3	Oocyte	107.187	44.7877	47.6811	47.1619	29.1088	33.4935	252.256	248.597	NA
ATP5H	Blastocytes	9.2612	20.6457	30.183	38.1356	26.3404	40.6011	134.891	129.318	NA
ATP5J	Blastocytes	40.772	23.0896	23.3958	41.622	37.8535	33.2073	129.812	163.552	NA
ATP5O	Blastocytes	94.6894	48.6497	38.0116	77.6813	55.5161	53.6493	496.157	467.57	NA
ATP6AP1	Blastocytes	2.30592	3.28369	2.15292	4.44927	8.09082	19.0219	33.7721	32.9785	NA
ATP6AP2	Blastocytes	4.3501	3.80148	1.47489	2.11289	18.5171	28.2732	31.1768	53.7237	NA
ATP6V0B	Blastocytes	197.585	71.4468	91.8857	137.575	68.0718	84.613	170.172	401.806	NA
ATP6V0D1	4-cell	13.5157	78.6855	63.5807	156.765	61.0537	32.3414	58.5982	51.26	NA
ATP6V0D2	Blastocytes	0.0135072	0.0112211	0.012337	0.046721	0.014404	0.043891	19.7212	111.891	NA
ATP6V0E1	Blastocytes	28.8681	92.4007	75.1258	85.668	126.949	244.512	256.873	204.304	NA
ATP6V1A	Blastocytes	0.673294	0.662455	0.296651	0.356227	4.17929	5.41803	9.52483	47.6514	NA
ATP6V1B1	Blastocytes	0	0	0.0187756	0.00547479	0	0	2.26885	26.6365	NA
ATP6V1E1	Morula	7.90815	26.292	18.5718	31.9659	104.701	283.038	92.1041	119.589	NA
ATP6V1G1	Blastocytes	297.565	164.424	128.688	112.038	89.2073	75.5448	262.095	265.669	NA
ATP7A	Zygote	1.31985	2.95522	1.29607	3.02175	0.895017	0.87372	4.22747	0.0372613	NA
ATP7B	Oocyte	8.10857	4.32771	3.18539	2.27613	0.153193	0.389036	0.304991	4.49951	NA
ATP8A1	4-cell	2.30299	3.77644	2.46539	6.66276	1.48109	0.844228	0.891703	0.00344906	NA
ATPAF1	Blastocytes	0.821159	2.90094	1.16164	2.5146	2.08515	3.09534	11.9748	15.1877	NA
ATPIF1	8-cell	9.18973	4.9539	4.52098	5.61665	129.69	222.571	55.3236	14.6154	NA
ATPIF1	Morula	9.18973	4.9539	4.52098	5.61665	129.69	222.571	55.3236	14.6154	NA
ATXN10	Blastocytes	2.47095	6.63493	3.66121	7.95415	9.60261	17.5441	54.4897	34.6899	NA
ATXN2	Oocyte	159.05	82.7112	56.3103	41.2331	17.2249	17.1961	24.2011	15.924	NA
ATXN2L	2-cell	24.0704	30.4828	37.8635	36.3171	6.41941	1.5599	1.05676	3.1911	NA
ATXN7L3	8-cell	0.0812894	0.147379	0.0563571	0.301281	5.90199	2.4244	3.8504	2.08147	NA
AUP1	Blastocytes	8.38146	8.66091	5.43543	13.8382	5.60639	12.5917	40.7963	94.781	NA
AURKAIP1	Blastocytes	6.9615	5.66406	4.71891	6.9911	22.7834	31.8777	99.7514	66.6466	NA
AURKC	4-cell	147.763	60.1575	56.9341	151.836	71.5654	42.4954	0.269452	1.04846	NA
AUTS2	Zygote	6.4562	9.14872	4.53745	5.15664	1.91867	2.01932	0.666101	0.570952	NA
AVEN	4-cell	14.9323	24.5112	20.4376	43.16	6.74443	1.97988	1.4376	10.9425	NA
AVP	4-cell	0.45097	0.274453	0.205935	1.11776	0.265274	0.0755812	0.65268	0.0224653	NA
AZIN1	8-cell	10.9553	24.4764	21.569	32.3441	106.79	93.9149	13.1198	46.329	NA
AZIN1	Morula	10.9553	24.4764	21.569	32.3441	106.79	93.9149	13.1198	46.329	NA
B2M	8-cell	0	0.134858	0.0936552	0.0608806	20.1473	53.6856	29.7595	6.07977	NA
B3GNT7	Blastocytes	0.938017	0.574547	0.589779	0.158863	1.42664	2.09941	47.1273	16.2919	NA
B9D2	Morula	0.893999	1.41741	0.723281	2.58882	27.441	23.3322	4.29175	3.11145	NA
BAG1	Blastocytes	0.666234	2.14786	1.55274	3.05071	6.49077	3.35661	9.16216	16.0466	NA
BAG3	Blastocytes	0.244443	0.444652	0.0531273	1.70935	5.6647	4.51342	26.3278	24.8362	NA
BAG4	8-cell	8.38406	7.97519	7.32437	8.98862	62.2404	68.0991	10.0384	9.44798	NA
BAG4	Morula	8.38406	7.97519	7.32437	8.98862	62.2404	68.0991	10.0384	9.44798	NA
BAGE	8-cell	0.128574	0.150387	0.185746	0.225194	4.49764	5.18791	0	0.0347736	NA
BAGE	Morula	0.128574	0.150387	0.185746	0.225194	4.49764	5.18791	0	0.0347736	NA
BAHD1	Blastocytes	0.0133427	0.014481	0.00888076	0	1.63131	1.19751	2.83543	3.79949	NA
BAIAP2	Oocyte	204.736	121.903	148.062	96.0606	21.8541	17.2079	9.63975	8.60566	NA
BAIAP2L2	Morula	1.42587	2.5978	2.35438	1.54127	7.3779	25.7076	1.46595	1.02108	NA
BAK1	Morula	0.0459163	1.51802	0.691286	1.24674	51.863	139.198	19.6368	12.2309	NA
BAMBI	8-cell	0.317946	0.847664	0.853079	1.28054	93.3761	177.572	95.2061	0.761818	NA
BAMBI	Morula	0.317946	0.847664	0.853079	1.28054	93.3761	177.572	95.2061	0.761818	NA
BANP	Oocyte	113.87	64.9947	39.0217	40.6008	8.02765	17.9174	12.9931	11.0734	NA
BARD1	Oocyte	261.709	219.758	129.664	108.614	31.8967	85.6353	38.844	35.6427	NA
BARX2	4-cell	13.6493	40.7217	24.4053	58.8938	3.59921	1.21821	0	0	NA
BASP1	Blastocytes	7.86005	11.7295	5.40333	4.38289	234.287	231.801	383.275	1387.96	NA
BAT1	Blastocytes	3.00282	24.9688	25.4673	41.992	29.4579	36.8948	51.7017	56.0853	NA
BAT3	4-cell	10.3627	15.2402	14.1629	24.3787	3.82433	3.17173	30.3007	17.5189	NA
BAT5	Oocyte	70.3657	25.1943	26.6221	33.3865	7.0375	1.60466	15.2956	3.02165	NA
BATF3	Morula	0.686479	3.53497	1.7593	1.89683	6.50336	64.9807	4.36669	13.6489	NA
BAZ1A	Oocyte	252.071	230.353	118.324	33.4639	103.996	79.9779	11.1589	35.7589	NA
BAZ1A	Zygote	252.071	230.353	118.324	33.4639	103.996	79.9779	11.1589	35.7589	NA
BAZ1B	Oocyte	117.359	88.3104	74.001	55.7803	43.1908	44.5568	13.9258	30.611	NA
BBS10	Zygote	1.38525	3.958	1.73255	3.16775	0.577174	1.2815	0.639337	0.457307	NA
BBS5	8-cell	2.82128	4.40708	3.2853	4.10676	47.6431	143.98	38.9629	9.73584	NA
BBS5	Morula	2.82128	4.40708	3.2853	4.10676	47.6431	143.98	38.9629	9.73584	NA
BCAS1	Oocyte	5.29037	1.16009	1.32651	2.47778	1.28279	0.510734	0.115092	0.211744	NA
BCAT1	Blastocytes	0.0378418	0.0164975	0	0.0496015	12.1173	22.5464	83.3983	103.648	NA
BCL2L10	Oocyte	2351.38	744.921	825.835	384.359	51.3283	1.89124	1.54384	0.022448	NA
BCL2L11	8-cell	4.10472	2.35228	1.29041	2.81086	16.4189	3.29094	1.46962	4.22189	NA
BCL2L12	Oocyte	29.9722	13.2151	7.38918	11.8738	5.35055	5.98529	17.2676	15.5546	NA
BCL8	8-cell	0.0671482	0.0412691	0.141475	0.246289	57.9876	30.7148	0	0	NA
BCL8	Morula	0.0671482	0.0412691	0.141475	0.246289	57.9876	30.7148	0	0	NA
BCOR	8-cell	0.00552474	0.00352211	0.0125614	0.848587	26.0231	6.91228	20.2164	3.74016	NA
BCS1L	Morula	0.846177	6.03252	3.2144	5.95972	16.8488	40.6776	13.7577	29.1655	NA
BET1L	8-cell	1.3734	1.47772	1.55705	2.45977	17.7756	12.6464	13.0254	10.4568	NA
BHMT2	Oocyte	5.88809	4.66956	1.76224	1.0924	1.14965	0.909201	0.81597	1.29714	NA
BHMT2	Zygote	5.88809	4.66956	1.76224	1.0924	1.14965	0.909201	0.81597	1.29714	NA
BIK	8-cell	0.366184	0.330097	0.454874	0.44609	461.611	1584.77	5.98839	9.92846	NA
BIK	Morula	0.366184	0.330097	0.454874	0.44609	461.611	1584.77	5.98839	9.92846	NA
BIN1	Blastocytes	0.00585673	0	0.00277764	0.698133	0.00434743	0.700625	19.2994	40.5642	NA
BIN2	Blastocytes	0	0.0120335	0.0465182	0.257418	4.51731	1.9796	0.241239	37.4117	NA
BIN3	Oocyte	77.3578	44.1738	30.3983	30.8229	11.3397	9.22087	0.825566	5.98885	NA
BIRC2	Oocyte	62.0153	48.0924	33.9799	20.3287	34.3458	15.7473	17.8958	6.94064	NA
BIRC5	Morula	4.05101	10.7146	7.22605	7.2617	44.2033	36.4452	24.5509	29.1044	NA
BLOC1S1	Blastocytes	13.5451	6.20158	4.00827	12.5951	8.4591	13.9448	120.637	36.4569	NA
BLVRB	Morula	0.320383	0.142361	0	0.457828	10.0923	74.1385	2.12413	9.40436	NA
BMI1	Blastocytes	0.0155928	0.0190259	0.0628174	0.190291	3.95144	5.58893	10.2353	16.9532	NA
BMP15	2-cell	42.253	192.026	184.496	123.094	32.8654	5.04748	0	0.0122388	NA
BMPR1A	4-cell	10.6341	21.4302	13.0983	24.446	10.4638	6.86354	8.40728	22.8415	NA
BMS1	Morula	6.75152	8.60335	7.92208	5.13331	8.97967	15.3905	8.20297	10.2278	NA
BNIP2	8-cell	0.925204	2.46383	1.37085	2.09051	151.899	53.6039	34.6718	25.4	NA
BNIP2	Morula	0.925204	2.46383	1.37085	2.09051	151.899	53.6039	34.6718	25.4	NA
BNIP3L	Oocyte	116.985	62.4759	68.636	86.1295	43.0377	29.3948	6.09631	6.6855	NA
BOLA3	Blastocytes	4.48648	2.39224	1.87893	2.94724	0.336869	3.3614	203.83	208.558	NA
BOP1	Blastocytes	1.7715	2.78989	2.0187	2.44278	24.2423	23.9169	39.5144	47.5692	NA
BPHL	Oocyte	6.79355	2.27195	1.24218	1.27196	1.80313	0.98395	7.14044	5.11039	NA
BRCC3	Blastocytes	1.62146	1.43234	0.722468	2.36261	1.79238	4.76198	13.4227	33.281	NA
BRD3	Oocyte	49.1808	20.4572	19.1259	25.8114	2.7418	4.90528	56.9876	16.2491	NA
BRDT	8-cell	57.6263	43.7691	31.1328	35.5052	315.995	174.891	73.7746	52.2888	NA
BRDT	Morula	57.6263	43.7691	31.1328	35.5052	315.995	174.891	73.7746	52.2888	NA
BRI3	Oocyte	117.428	135.939	55.9829	28.0191	8.81879	3.71793	10.9183	16.7766	NA
BRI3	Zygote	117.428	135.939	55.9829	28.0191	8.81879	3.71793	10.9183	16.7766	NA
BRI3BP	Oocyte	45.1353	22.7143	14.8555	9.20024	5.41702	3.48038	0.159544	5.73265	NA
BRMS1	Morula	0.725713	4.92205	2.95595	6.98463	38.9232	71.9447	40.2893	39.7372	NA
BRMS1L	8-cell	0.528168	0.280576	0.183152	0.529454	18.0995	22.2532	20.8083	8.11468	NA
BRMS1L	Morula	0.528168	0.280576	0.183152	0.529454	18.0995	22.2532	20.8083	8.11468	NA
BRPF1	Oocyte	101.417	47.7432	38.0874	45.8079	18.4859	11.7285	6.02146	4.93855	NA
BTAF1	8-cell	0.653334	0.662833	0.251626	0.0224892	14.7278	8.8387	1.35921	3.8203	NA
BTAF1	Morula	0.653334	0.662833	0.251626	0.0224892	14.7278	8.8387	1.35921	3.8203	NA
BTF3	Blastocytes	479.532	362.89	502.565	746.046	688.159	634.291	853.461	900.487	NA
BTF3L4	Blastocytes	3.42028	16.064	11.9179	35.4689	28.7509	32.6903	82.2892	108.498	NA
BTG1	8-cell	18.2706	9.69741	4.97274	3.09869	80.702	20.739	23.5716	25.2285	NA
BTG3	8-cell	0.147173	0.124161	0.0857772	0.456465	52.2696	42.6207	22.8574	10.9443	NA
BTG3	Morula	0.147173	0.124161	0.0857772	0.456465	52.2696	42.6207	22.8574	10.9443	NA
BTK	8-cell	0.0352615	0.0203708	0	0.215073	3.64781	0.855178	6.46486	0.67702	NA
BTLA	8-cell	0	0	0	0.0668693	6.25964	4.77756	6.17495	0.139506	NA
BTN1A1	Morula	0	0	0	0	7.25483	47.0294	0	0	NA
BTRC	4-cell	18.6885	38.1059	33.5011	47.2548	33.2245	25.8341	0.204866	2.88929	NA
BUB1	4-cell	26.811	62.3208	46.9891	89.9924	35.2748	25.6837	34.4367	40.0741	NA
BUD31	8-cell	9.0422	10.8217	11.091	13.768	203.087	177.745	67.6882	118.819	NA
BUD31	Morula	9.0422	10.8217	11.091	13.768	203.087	177.745	67.6882	118.819	NA
BYSL	Morula	3.24405	15.1366	12.6604	51.5921	80.0816	152.704	40.1488	42.3133	NA
BZW1	8-cell	16.1699	26.1133	17.9445	25.2161	639.675	412.286	134.785	120.346	NA
BZW1	Morula	16.1699	26.1133	17.9445	25.2161	639.675	412.286	134.785	120.346	NA
C10orf119	Oocyte	46.9262	19.7732	13.4227	20.089	8.15506	4.04485	5.59119	9.70069	NA
C10orf125	Blastocytes	0	0	0	0.00690764	0.099587	0.145655	19.0964	25.3206	NA
C10orf18	4-cell	33.3362	39.2082	38.5547	53.6194	18.0675	3.66765	4.08801	5.66179	NA
C10orf2	8-cell	0.478397	2.2745	1.5803	5.30334	34.3314	23.8222	6.33861	8.77236	NA
C10orf28	8-cell	0.464031	3.41739	2.22376	2.64342	35.9116	19.1177	19.3722	11.9011	NA
C10orf72	8-cell	0.516292	0.716379	0.790461	0.614909	1.59589	2.55206	0.997636	2.1349	NA
C10orf78	4-cell	10.3213	67.6033	34.8156	89.3903	6.56902	4.13442	14.8728	17.0139	NA
C10orf95	Oocyte	16.4684	11.9546	9.46264	5.48515	0.839934	1.00463	1.81585	1.5627	NA
C11orf31	Oocyte	199.011	40.1836	35.3665	90.9621	122.368	101.971	78.1243	83.5336	NA
C11orf46	Zygote	54.1035	68.6355	40.4262	28.1845	17.0742	15.7719	26.1167	11.4715	NA
C11orf48	Morula	8.82584	4.76432	4.02191	8.01886	99.6851	282.148	95.739	132.628	NA
C11orf53	Oocyte	2.20725	1.22346	0.853621	0	0.204285	0	0	0	NA
C11orf58	Blastocytes	39.7399	73.2522	58.2125	63.6411	21.3415	55.8659	91.4963	116.761	NA
C11orf59	Blastocytes	14.7134	11.439	7.94912	12.4413	19.4297	31.7885	114.344	196.42	NA
C11orf61	8-cell	0.0330762	0.0497852	0.108485	0.0173291	15.0256	2.56867	1.03605	4.41205	NA
C11orf63	Oocyte	2.47766	3.74819	0.813852	0.23787	0.0536866	0.176903	0.0333597	0.0638654	NA
C11orf73	Blastocytes	15.9732	4.03476	2.1461	5.33509	3.45278	3.32258	54.5927	83.2222	NA
C11orf74	Oocyte	90.3816	39.5713	35.6333	38.9107	24.3982	3.87012	5.9724	22.3477	NA
C11orf75	Oocyte	26.748	7.75816	21.0307	3.76286	2.37047	3.83651	12.942	3.23996	NA
C11orf80	Zygote	0.830712	3.13533	0.915692	2.43759	0.905067	0.239016	0.0850866	0.0428079	NA
C11orf82	8-cell	21.8335	11.5745	9.27276	11.4606	79.456	28.3238	7.93069	6.46392	NA
C12orf10	8-cell	0.255249	1.05268	1.09141	3.00528	27.1081	20.8162	4.23694	6.39803	NA
C12orf29	Oocyte	61.5912	11.009	7.18932	3.06573	0.56579	6.36978	1.31807	13.371	NA
C12orf43	Morula	41.2138	44.0313	27.5386	51.2964	136.258	126.635	33.0734	25.1212	NA
C12orf44	8-cell	3.39825	3.64665	1.91868	4.66368	187.583	147.961	21.952	30.1022	NA
C12orf44	Morula	3.39825	3.64665	1.91868	4.66368	187.583	147.961	21.952	30.1022	NA
C12orf47	8-cell	2.49421	2.52649	1.18983	3.29273	18.0653	36.3086	6.16944	7.1467	NA
C12orf47	Morula	2.49421	2.52649	1.18983	3.29273	18.0653	36.3086	6.16944	7.1467	NA
C12orf49	Morula	4.04206	6.93794	3.31738	5.79396	32.3103	23.348	8.44573	6.0892	NA
C12orf72	Morula	0.701581	0.481676	0.353094	0.680448	4.63676	5.45885	0.989262	1.00119	NA
C12orf75	Oocyte	63.3172	24.935	12.0462	6.60157	1.55682	0.0186276	0.400029	0.675786	NA
C13orf15	Blastocytes	0.922295	0.149489	0.08024	0.339275	1.25109	1.29679	52.8732	39.5516	NA
C13orf23	2-cell	231.538	456.214	574.905	295.612	25.1818	6.96374	7.71719	34.4839	NA
C13orf23	Zygote	231.538	456.214	574.905	295.612	25.1818	6.96374	7.71719	34.4839	NA
C13orf31	8-cell	0.496566	1.62029	0.928998	0.848474	7.83958	1.19751	0	0.341021	NA
C14orf119	Morula	24.6386	16.2214	17.9587	19.0839	57.8249	90.741	45.8336	46.0676	NA
C14orf138	8-cell	0.101191	0.112799	0.0408235	0.605068	23.4259	25.1344	2.99684	11.3045	NA
C14orf138	Morula	0.101191	0.112799	0.0408235	0.605068	23.4259	25.1344	2.99684	11.3045	NA
C14orf142	Morula	0.518708	4.85495	2.24273	2.40898	16.6707	26.9568	9.53624	5.9031	NA
C14orf166	4-cell	553.925	335.91	513.541	755.17	493.175	288.682	282.397	369.283	NA
C14orf178	Morula	0.330267	0.471298	0.293577	0.244636	2.0666	2.57311	0.411406	0.348487	NA
C14orf21	8-cell	0.0969667	0.0110481	0.085341	0.121001	10.0777	2.19254	2.76957	1.35817	NA
C14orf28	Oocyte	3.32041	2.69916	0.938009	0.515816	0.538506	0.919122	0	0.0772939	NA
C14orf34	Zygote	0	4.67442	0.932561	0.29049	0.101954	0.00796502	0	0	NA
C14orf37	4-cell	10.6982	10.4008	7.69731	25.4402	6.69838	2.43115	0.293921	0.644244	NA
C14orf38	Zygote	1.90577	5.74985	2.67194	3.82405	1.37593	0.947498	0.0151793	0.0562999	NA
C14orf4	2-cell	2.62627	7.93027	6.03159	3.03487	1.52342	1.07129	0.506453	1.04298	NA
C15orf44	Oocyte	35.3979	13.3728	6.45453	17.3115	9.40072	9.95642	8.9211	9.31601	NA
C16orf42	Blastocytes	0.471401	1.43946	1.14365	0.662217	1.58086	5.87544	9.34413	19.8629	NA
C16orf73	Morula	0.274832	0.341982	0.224773	0.527601	1.95432	6.34978	0.09744	0.00170044	NA
C16orf74	Oocyte	71.7757	29.766	22.4027	41.8202	10.5421	3.22119	0.044249	2.89509	NA
C16orf79	Blastocytes	0	0.0946919	0.0588153	0.120456	0.239001	0.529753	6.12036	1.32646	NA
C16orf80	8-cell	12.3487	7.2282	4.14569	9.9804	232.961	89.1613	89.4741	72.8002	NA
C16orf91	8-cell	4.43533	1.04522	1.06507	2.32137	100.737	58.8222	14.3125	11.2005	NA
C17orf103	Morula	1.30921	2.62535	2.05069	2.46756	4.5794	23.5411	3.53497	1.57885	NA
C17orf106	Blastocytes	0.279614	0.176461	0.322053	2.22532	2.32843	4.58145	26.1688	25.0729	NA
C17orf37	Blastocytes	0.516735	5.27352	3.80807	2.93494	17.5167	69.7396	91.0392	78.1756	NA
C17orf37	Morula	0.516735	5.27352	3.80807	2.93494	17.5167	69.7396	91.0392	78.1756	NA
C17orf39	4-cell	6.60447	23.4061	12.8054	29.9982	6.56848	2.25532	3.48648	5.86837	NA
C17orf42	8-cell	5.34302	8.61683	3.87677	2.8573	54.5689	64.2101	13.6155	26.5743	NA
C17orf42	Morula	5.34302	8.61683	3.87677	2.8573	54.5689	64.2101	13.6155	26.5743	NA
C17orf53	4-cell	8.45993	22.2286	13.4852	28.203	14.5836	14.3348	1.70701	3.07243	NA
C17orf59	8-cell	0.0673628	0.116466	0.214209	0.207142	13.0096	20.7092	0.764729	5.46015	NA
C17orf59	Morula	0.0673628	0.116466	0.214209	0.207142	13.0096	20.7092	0.764729	5.46015	NA
C17orf75	Oocyte	31.8683	13.875	8.32484	11.5656	4.1023	1.77656	18.5191	18.0538	NA
C17orf79	Oocyte	151.417	74.9871	69.6838	76.7686	34.5323	17.6149	22.2766	30.9792	NA
C17orf81	Blastocytes	2.99906	4.61947	3.99861	6.17512	8.27597	13.5356	19.062	32.5361	NA
C17orf86	Morula	0.374083	0.741576	0.666517	0.730837	2.95057	5.6768	1.7194	1.52132	NA
C18orf21	Morula	0.567834	4.65396	5.15704	8.06945	42.711	79.5335	19.5045	40.2112	NA
C19orf12	Blastocytes	0.339558	0.444062	0.248757	0.452872	1.79161	3.59463	9.12762	9.03752	NA
C19orf21	Morula	0.00584415	0.0265791	0.0190578	1.10736	1.85691	11.2789	1.51667	12.4594	NA
C19orf22	4-cell	99.588	54.9516	78.7791	121.779	58.3396	16.8865	13.4621	11.5439	NA
C19orf24	4-cell	1.96456	16.3238	10.6855	33.4167	12.5739	13.8848	26.8159	9.35591	NA
C19orf40	Oocyte	53.6963	26.0203	13.4717	7.31642	12.9959	14.9089	16.7509	13.0955	NA
C19orf42	Morula	4.56454	3.832	1.45332	6.34326	19.5775	72.3742	30.9851	32.8247	NA
C19orf48	Morula	15.3064	10.7391	13.4368	31.3794	197.47	438.473	62.3834	90.8597	NA
C19orf50	Blastocytes	7.26553	15.8441	12.4608	18.8625	12.7039	36.5587	97.7723	80.4902	NA
C19orf53	8-cell	3.2715	8.62131	5.76984	18.1022	111.759	150.637	25.2054	32.2695	NA
C19orf53	Morula	3.2715	8.62131	5.76984	18.1022	111.759	150.637	25.2054	32.2695	NA
C19orf56	Blastocytes	30.238	6.43289	9.80233	19.8115	18.9734	56.6781	91.8939	96.2863	NA
C19orf57	Oocyte	7.51499	3.20616	2.77125	2.3755	0.128018	0.359257	0.0301817	0.976133	NA
C19orf62	Blastocytes	5.42152	12.8585	8.21428	20.8245	42.5949	33.1216	72.8794	58.1068	NA
C19orf63	Blastocytes	1.05326	1.18004	1.37585	0.622256	6.55547	9.16812	31.7734	14.0529	NA
C19orf70	Blastocytes	3.11224	0.585388	1.13163	2.67105	17.9908	15.2996	33.1806	24.5426	NA
C1D	8-cell	0.293611	0.776373	0.420788	1.13204	173.678	183.397	24.3844	57.6506	NA
C1D	Morula	0.293611	0.776373	0.420788	1.13204	173.678	183.397	24.3844	57.6506	NA
C1GALT1	8-cell	7.56726	11.3046	8.80635	9.20752	69.9736	32.8658	18.9571	17.5376	NA
C1orf104	Blastocytes	0.0480471	0.0754169	0.07949	0.10996	0.0705008	0.323449	3.50365	10.3844	NA
C1orf106	Blastocytes	0.0881839	0.0541384	0.0612562	0.219418	0.0516592	1.05321	24.4093	15.7701	NA
C1orf107	8-cell	0.374567	0.620881	0.394788	1.11545	17.619	14.7668	8.61737	6.50615	NA
C1orf107	Morula	0.374567	0.620881	0.394788	1.11545	17.619	14.7668	8.61737	6.50615	NA
C1orf109	Blastocytes	0.796909	1.14221	0.714154	1.34832	4.61943	6.42405	7.16186	17.5211	NA
C1orf114	Oocyte	65.2015	38.3932	12.4631	10.9909	5.55033	5.35087	0	0.422595	NA
C1orf131	Oocyte	244.255	211.377	126.309	47.175	28.567	51.2179	19.2371	54.2981	NA
C1orf146	Oocyte	25.4328	3.20909	4.32463	1.20741	0.181433	0.0253748	0	0.604628	NA
C1orf212	Blastocytes	0.346184	0.780093	0.69526	0.818479	3.79913	21.9609	17.1166	15.6802	NA
C1orf212	Morula	0.346184	0.780093	0.69526	0.818479	3.79913	21.9609	17.1166	15.6802	NA
C1orf228	Oocyte	1.1154	0.151483	0.0738559	0.342539	0.0855155	0.0186228	0	0	NA
C1orf230	Oocyte	487.939	128.446	151.644	171.626	93.3251	10.1619	0	0.0258517	NA
C1orf38	Morula	0.0444201	0.00978081	0.0559598	0.117353	3.16935	14.2778	0.00501486	0	NA
C1orf52	8-cell	0.997006	0.542899	0.355178	0.532585	51.5419	34.2429	14.7766	19.6529	NA
C1orf52	Morula	0.997006	0.542899	0.355178	0.532585	51.5419	34.2429	14.7766	19.6529	NA
C1orf53	Oocyte	10.8212	1.5983	1.32775	0.305983	0.0809169	0.274945	3.5209	0.514131	NA
C1orf57	Blastocytes	6.34636	6.71154	4.60702	9.66357	4.12137	9.66791	52.7326	46.0423	NA
C1orf58	8-cell	0.649025	2.05507	1.07531	2.40309	18.7224	19.6078	3.511	4.35992	NA
C1orf63	8-cell	12.8862	4.05051	3.2338	7.4282	415.958	78.6717	3.60854	51.5247	NA
C1orf66	Oocyte	6.07007	1.50379	1.16483	1.19425	1.1905	2.7006	5.69081	1.26519	NA
C1orf77	8-cell	1.65379	17.7962	19.7027	24.0219	186.101	123.683	41.6709	67.703	NA
C1orf83	8-cell	2.53172	2.43256	1.88141	1.01813	14.2785	5.69053	1.51063	2.16985	NA
C1orf86	8-cell	0.805589	1.61573	1.83057	2.45715	4.0099	4.28513	2.6926	6.93219	NA
C1orf9	Zygote	20.9902	25.0867	11.2229	8.46204	3.2481	8.15266	7.29143	4.59098	NA
C1orf96	8-cell	8.40524	11.3734	7.77417	9.19942	45.8363	20.0497	3.44763	4.03618	NA
C20orf111	8-cell	5.94507	48.592	42.7038	68.5624	253.738	166.125	25.7415	48.5353	NA
C20orf191	8-cell	0	0	0.0344097	0.334162	9.98183	6.98453	0	0.188388	NA
C20orf194	Oocyte	30.4918	15.9356	15.6748	23.0568	7.90863	2.46646	1.10384	0.520426	NA
C21orf29	4-cell	1.73038	1.22693	0.988052	3.70242	0.991448	0.0276017	0	0	NA
C21orf33	Blastocytes	3.38362	3.23496	2.83463	2.84865	3.16804	1.42114	21.6036	38.0328	NA
C21orf45	Oocyte	526.632	343.034	276.338	124.68	73.9427	81.0102	86.7622	59.2943	NA
C21orf57	Morula	1.93603	1.47375	1.54217	2.69734	5.83056	16.0014	9.5459	7.22905	NA
C21orf59	Oocyte	1026.03	489.628	402.732	224.664	86.7003	109.304	123.705	198.708	NA
C21orf62	8-cell	0.688821	1.01526	1.21648	1.48088	3.21181	5.81966	2.73868	2.82365	NA
C21orf62	Morula	0.688821	1.01526	1.21648	1.48088	3.21181	5.81966	2.73868	2.82365	NA
C21orf63	4-cell	1.31114	10.1143	9.28397	17.0107	5.76744	0.427689	0.959479	0.00875902	NA
C21orf91	8-cell	2.02786	3.81701	2.14418	3.45584	49.8295	19.03	1.42775	1.98157	NA
C22orf25	Morula	0.0893729	0.178416	0.154127	0.241211	0.615691	5.75897	2.57552	8.39209	NA
C2orf15	Oocyte	126.557	64.3157	45.2218	76.66	23.8699	6.56774	0.221152	1.13799	NA
C2orf18	Morula	0.379231	1.07667	0.856057	1.43194	1.01541	6.11045	25.6468	5.04341	NA
C2orf47	Blastocytes	15.5234	15.999	9.04757	16.5294	8.12442	5.88294	63.5085	69.0305	NA
C2orf49	8-cell	11.8059	21.2447	20.9125	13.1667	131.252	129.771	35.6602	40.9724	NA
C2orf49	Morula	11.8059	21.2447	20.9125	13.1667	131.252	129.771	35.6602	40.9724	NA
C2orf51	8-cell	3.15803	13.7066	10.3762	31.7803	113.154	104.041	0.648789	1.31418	NA
C2orf65	Zygote	2.88231	6.00016	2.91317	4.82817	0.925898	1.63924	0.00781431	3.14971	NA
C2orf69	8-cell	5.46911	5.13138	2.36021	6.1012	66.6134	38.9473	17.3386	14.6853	NA
C2orf69	Morula	5.46911	5.13138	2.36021	6.1012	66.6134	38.9473	17.3386	14.6853	NA
C2orf76	4-cell	19.4859	34.3602	32.2875	58.4682	12.2594	5.96615	1.00747	8.43	NA
C3	8-cell	0	0.0417161	0.0152884	0.145973	6.10445	3.78524	0	0	NA
C3orf1	Blastocytes	62.2881	23.4151	14.0119	23.2887	64.2061	73.4274	93.9331	135.137	NA
C3orf17	4-cell	16.8023	42.1532	31.8091	50.8488	22.2166	27.5011	20.0697	13.3213	NA
C3orf26	Blastocytes	2.83304	6.38321	6.35006	3.88197	16.3498	61.1131	64.4495	67.7334	NA
C3orf31	4-cell	58.8834	42.5639	46.4717	109.371	9.79616	14.17	12.8523	20.3761	NA
C3orf33	Oocyte	39.6019	37.9701	20.8266	12.0964	3.70212	4.93906	0.716138	1.42895	NA
C3orf33	Zygote	39.6019	37.9701	20.8266	12.0964	3.70212	4.93906	0.716138	1.42895	NA
C3orf45	Blastocytes	0.194134	0	0.0201143	0.239462	3.95269	5.70208	6.14999	13.3894	NA
C3orf49	Oocyte	12.2899	3.71694	3.91821	7.9306	1.17372	0	0	0.0133206	NA
C3orf59	Zygote	20.5477	61.7889	33.7058	43.3132	3.79406	0.576199	0.175322	0.284546	NA
C3orf75	8-cell	1.3848	0.932179	1.37267	0.817216	41.7537	68.5688	3.79298	11.2965	NA
C3orf75	Morula	1.3848	0.932179	1.37267	0.817216	41.7537	68.5688	3.79298	11.2965	NA
C4orf22	Oocyte	2.76297	1.01633	0.89107	0.0353424	0.0955088	0.102934	0	0	NA
C4orf23	Oocyte	227.492	71.4656	59.897	80.0281	20.2088	7.54599	1.07251	2.08226	NA
C4orf3	Blastocytes	2.60526	1.71601	0.758084	0.434732	1.35541	19.5767	41.0024	27.1469	NA
C4orf3	Morula	2.60526	1.71601	0.758084	0.434732	1.35541	19.5767	41.0024	27.1469	NA
C4orf34	Oocyte	71.5601	31.9334	20.3824	9.92186	5.70177	4.56326	4.45878	5.93255	NA
C4orf43	Blastocytes	7.94827	6.28345	3.29732	6.08556	34.3352	56.1186	45.2788	63.9848	NA
C4orf46	8-cell	0.0234982	0.0378405	0.0165161	0.127022	17.3258	9.77623	2.66467	5.30257	NA
C4orf47	Oocyte	751.729	287.066	331.035	145.905	8.63305	12.0896	1.3362	0.498594	NA
C4orf52	Blastocytes	8.13822	3.45677	2.36778	9.68372	15.9566	43.1455	44.8161	87.6656	NA
C4orf52	Morula	8.13822	3.45677	2.36778	9.68372	15.9566	43.1455	44.8161	87.6656	NA
C5orf24	Morula	0.419333	0.502809	0.299685	0.463698	1.91935	6.44495	1.59389	2.60798	NA
C5orf28	Morula	0.180076	0.298016	0.219573	0.773455	6.69425	11.0359	0.436633	2.28297	NA
C5orf32	Oocyte	258.866	103.875	107.012	97.4896	39.7584	15.4779	17.7379	49.8894	NA
C5orf34	Oocyte	80.7662	45.6161	36.0491	31.2754	4.96793	2.61525	0.0604565	1.41808	NA
C5orf45	Oocyte	119.373	51.638	57.6373	82.5617	11.9702	6.22888	2.51436	1.51376	NA
C5orf58	2-cell	14.2627	28.315	28.8963	8.65889	1.35552	1.34331	0.669588	1.01503	NA
C6orf103	Zygote	0.227518	1.04433	0.717404	0.149197	0.0836304	0.0599458	0	0	NA
C6orf108	Blastocytes	2.1505	0.9374	0.483727	1.24808	0.586686	1.28783	24.4272	15.5567	NA
C6orf115	Blastocytes	0.438207	0.30207	0.140239	1.05823	6.19414	11.8989	73.2943	72.9292	NA
C6orf125	4-cell	14.0472	12.3145	10.5863	36.7011	14.4387	10.5896	31.1189	44.116	NA
C6orf132	Blastocytes	0.0737551	0.0858586	0.0338748	0.0522299	0.0730167	0.554087	10.3617	15.0512	NA
C6orf138	8-cell	1.80739	2.8514	2.68402	1.78896	5.92208	11.9905	6.03446	5.32084	NA
C6orf147	8-cell	0.0843267	0.0939702	0.0620558	0.136841	5.57706	10.1247	0.22333	3.23988	NA
C6orf147	Morula	0.0843267	0.0939702	0.0620558	0.136841	5.57706	10.1247	0.22333	3.23988	NA
C6orf204	8-cell	6.41391	8.44148	5.32501	4.8496	61.9099	22.2964	3.74237	0.675509	NA
C6orf204	Morula	6.41391	8.44148	5.32501	4.8496	61.9099	22.2964	3.74237	0.675509	NA
C6orf211	Blastocytes	0.763152	1.49354	0.339835	3.82186	34.2318	47.5809	264.282	115.356	NA
C6orf48	Morula	80.3711	69.1996	117.08	273.434	268.05	366.478	99.8119	78.712	NA
C6orf52	Oocyte	321.878	114.043	122.497	238.37	83.0293	9.01711	0	0.0464415	NA
C6orf57	Oocyte	8.57204	1.60859	2.83894	3.06927	1.65029	1.8404	0.0273685	1.17643	NA
C6orf62	Blastocytes	12.5681	21.1512	8.43075	10.142	70.0548	58.3878	104.617	110.374	NA
C6orf64	Oocyte	58.4506	26.423	17.8147	25.811	5.10468	3.04185	11.51	1.94391	NA
C7orf10	Oocyte	126.4	31.6645	24.2343	39.146	6.06266	1.27945	0.409199	1.79565	NA
C7orf11	Morula	9.15668	2.80946	1.57844	1.85783	71.7535	114.799	114.078	69.0416	NA
C7orf23	Oocyte	29.2503	7.49226	4.65535	4.92581	5.22773	7.35907	4.73698	2.62159	NA
C7orf26	Oocyte	38.9434	13.5868	10.8374	15.0035	3.44558	1.20243	1.15011	3.35811	NA
C7orf28B	Oocyte	587.593	270.445	276.526	183.039	18.0629	8.4895	34.0388	47.6749	NA
C7orf30	Blastocytes	17.0793	18.1702	10.2989	12.3448	113.181	183.608	141.831	172.741	NA
C7orf40	8-cell	2.56393	1.65376	0.573806	1.93386	176.899	212.747	101.762	22.5967	NA
C7orf40	Morula	2.56393	1.65376	0.573806	1.93386	176.899	212.747	101.762	22.5967	NA
C7orf42	4-cell	56.0245	42.1527	35.2015	73.0213	36.3331	6.46703	21.2962	14.5575	NA
C7orf47	Oocyte	109.497	47.5472	44.6743	93.8665	23.7747	5.02606	0.165571	1.29965	NA
C7orf49	4-cell	0.72158	12.3593	7.39446	31.7003	7.58059	28.9884	30.9126	8.04772	NA
C7orf58	4-cell	18.7277	24.0476	17.0788	43.8195	22.0833	56.0972	0.0167205	0.919131	NA
C7orf64	8-cell	17.226	47.4999	34.8014	44.518	75.4946	33.4467	10.2554	4.72363	NA
C8orf33	8-cell	0.976342	1.97648	2.10223	4.24691	71.5309	73.7381	7.99276	28.1836	NA
C8orf33	Morula	0.976342	1.97648	2.10223	4.24691	71.5309	73.7381	7.99276	28.1836	NA
C8orf41	8-cell	1.47957	4.64771	2.64958	6.56394	28.7307	26.3816	7.29799	13.7187	NA
C8orf41	Morula	1.47957	4.64771	2.64958	6.56394	28.7307	26.3816	7.29799	13.7187	NA
C8orf59	Blastocytes	2.08666	3.40365	2.29388	1.36885	7.99286	15.8321	36.8368	45.4431	NA
C8orf59	Morula	2.08666	3.40365	2.29388	1.36885	7.99286	15.8321	36.8368	45.4431	NA
C9orf123	Blastocytes	5.53488	0.879908	0.619538	0.519642	1.7474	9.14505	52.6204	33.5363	NA
C9orf140	Blastocytes	0.00925982	0	0.00746712	0.0249259	0	1.47373	29.4385	82.1092	NA
C9orf142	Blastocytes	0.521495	1.08881	0.83302	0.945741	3.44475	10.2971	6.13174	32.9287	NA
C9orf85	8-cell	2.90811	1.77514	1.01356	0.854601	59.2518	35.2966	15.8052	20.3965	NA
C9orf85	Morula	2.90811	1.77514	1.01356	0.854601	59.2518	35.2966	15.8052	20.3965	NA
C9orf91	Zygote	7.13424	18.954	13.2611	14.844	1.8163	0.346855	0.592607	0.0839066	NA
CA2	Blastocytes	0	0	0.00732632	0.0111451	1.47671	3.22852	17.6793	61.9355	NA
CA5B	8-cell	0.687543	0.649822	0.770994	0.809857	1.82189	2.09956	1.05929	1.3884	NA
CAB39L	8-cell	0.528835	0.438851	0.472923	0.38946	20.3451	12.2987	3.3517	2.14858	NA
CAB39L	Morula	0.528835	0.438851	0.472923	0.38946	20.3451	12.2987	3.3517	2.14858	NA
CABP4	Morula	0.0497297	0.0976101	0.20312	0.187604	0.928259	2.53868	0.362127	0.392094	NA
CABP7	8-cell	0.046656	0.278585	0.221285	0.197924	5.24059	5.52918	0.681834	0.704699	NA
CABP7	Morula	0.046656	0.278585	0.221285	0.197924	5.24059	5.52918	0.681834	0.704699	NA
CACNA2D1	4-cell	8.85856	10.0573	11.5395	31.1862	9.78736	4.07439	0.00751882	0.00911494	NA
CACNB3	Morula	0.073088	0.24277	0.234326	0.839479	12.35	17.3699	12.9681	0.315866	NA
CACYBP	Blastocytes	18.5245	33.8023	21.9272	17.1707	49.7256	48.0975	157.878	174.168	NA
CAD	Blastocytes	2.27199	7.40333	6.60277	8.89974	3.61946	7.81886	16.262	18.4307	NA
CALD1	Blastocytes	0.0151728	0	0.00259006	0.0865168	0.119955	0.0215551	15.9053	46.5291	NA
CALR	Blastocytes	11.1979	24.6328	19.4186	20.7368	38.1573	40.7458	83.0476	55.2082	NA
CAMK1D	Oocyte	20.9718	13.1993	8.48634	8.51771	1.40509	2.39801	0.401883	0.267243	NA
CAMK2A	4-cell	5.04266	6.34916	5.56286	10.7303	1.9742	0.597418	0	0.000998814	NA
CAMK2G	4-cell	85.1416	53.2487	41.8693	84.5514	14.5826	6.60075	3.22031	14.2779	NA
CAMK2G	Oocyte	85.1416	53.2487	41.8693	84.5514	14.5826	6.60075	3.22031	14.2779	NA
CAMTA1	Oocyte	8.53021	5.4918	2.62218	1.77003	1.8006	1.2137	0.963785	1.05535	NA
CAMTA1	Zygote	8.53021	5.4918	2.62218	1.77003	1.8006	1.2137	0.963785	1.05535	NA
CAND1	Blastocytes	2.20386	2.90567	1.62559	3.80562	4.66809	9.00755	19.3091	24.5964	NA
CAND2	Zygote	1.4403	4.22801	2.2673	2.888	0.953618	1.06958	0.0107769	0.0426449	NA
CANX	Blastocytes	17.692	38.4086	26.9652	24.462	20.9849	37.6058	125.677	130.377	NA
CAP1	Blastocytes	54.2155	16.8216	19.7263	21.029	58.8635	92.5804	301.664	232.759	NA
CAPN1	Blastocytes	0.432682	0.831932	1.52514	2.91746	0.808221	1.54747	11.9597	20.6236	NA
CAPN2	Blastocytes	2.77498	1.51807	1.26115	4.49426	1.56674	3.61447	24.3632	35.7908	NA
CAPN5	Zygote	0.579944	3.97944	1.98911	3.3775	0.519631	0.147327	2.2904	0.861927	NA
CAPNS1	Blastocytes	2.51281	3.23126	3.52563	3.72237	5.00813	14.2293	71.277	40.1747	NA
CAPZA2	Blastocytes	1.04767	2.231	1.33112	2.84729	2.35383	15.0711	18.8431	44.7639	NA
CARHSP1	Blastocytes	0.617319	0.846556	0.762109	2.14879	6.18667	2.15078	17.4757	14.493	NA
CARKD	4-cell	11.6941	29.6918	21.2962	48.8052	25.5675	15.8112	16.5527	7.59279	NA
CASC1	2-cell	24.6815	82.2582	59.0341	33.6876	6.6662	7.90469	0	0.00922641	NA
CASC1	Zygote	24.6815	82.2582	59.0341	33.6876	6.6662	7.90469	0	0.00922641	NA
CASP6	Oocyte	156.558	89.4002	20.7218	12.9872	15.0151	113.328	35.6996	29.0143	NA
CASP9	Oocyte	47.4074	11.4105	6.67201	6.55896	2.30098	2.83254	2.74583	3.12456	NA
CBL	8-cell	1.95495	2.63123	1.54979	2.03297	12.7101	16.0218	2.97999	8.2764	NA
CBL	Morula	1.95495	2.63123	1.54979	2.03297	12.7101	16.0218	2.97999	8.2764	NA
CBLN1	8-cell	0.294384	0.338553	0.339372	0.520959	38.5346	29.2688	0	0	NA
CBLN1	Morula	0.294384	0.338553	0.339372	0.520959	38.5346	29.2688	0	0	NA
CBLN4	Zygote	8.74865	9.39787	3.77604	2.13886	0.526921	0	0.00789846	0.245009	NA
CBS	Blastocytes	0.0182845	0.00873185	0	0.00871372	0.530311	1.09776	12.6372	5.57962	NA
CBWD1	Blastocytes	16.3027	10.0016	6.71963	3.91351	35.2109	26.6605	46.8749	80.6659	NA
CBWD2	Blastocytes	4.95664	3.24027	1.95283	0.98658	12.1404	11.5324	22.0251	26.1507	NA
CBWD3	Blastocytes	10.8493	7.77282	3.99771	2.22459	18.9867	15.4275	19.8551	31.1647	NA
CBWD5	Blastocytes	5.36082	2.79894	1.73799	0.990922	8.60561	7.49083	8.76608	15.3281	NA
CBX1	2-cell	113.996	151.443	172.554	88.9649	37.1662	37.1197	53.8717	49.2841	NA
CBX2	Oocyte	24.7148	8.567	7.42655	9.21807	2.51831	5.69838	0.181718	2.94738	NA
CBX3	Blastocytes	3.74645	8.24449	6.67493	2.89127	24.1973	26.8854	33.5609	46.0585	NA
CBX6	Morula	0.0153759	0.0271084	0.0110136	0.00851359	2.59167	7.145	0.778143	0.151769	NA
CBX8	4-cell	1.32655	9.35703	6.9808	14.6863	2.64085	2.09841	0	0.544814	NA
CBY1	Oocyte	110.798	35.5629	37.5477	26.2201	5.1326	3.51633	20.8587	8.11584	NA
CCDC101	4-cell	19.4341	26.401	17.1961	83.6132	16.9824	23.4689	55.1835	16.9636	NA
CCDC11	Zygote	4.27505	8.8729	3.06321	1.7337	1.6261	5.98194	0	0.540015	NA
CCDC115	8-cell	9.20024	17.7296	10.8867	14.7185	57.5561	28.777	19.8267	4.81995	NA
CCDC12	8-cell	9.41889	9.31063	7.73589	11.5395	227.126	140.931	48.3061	54.2918	NA
CCDC12	Morula	9.41889	9.31063	7.73589	11.5395	227.126	140.931	48.3061	54.2918	NA
CCDC120	Oocyte	16.0758	8.70245	6.47073	6.55611	1.21694	1.53661	4.85711	2.44017	NA
CCDC121	Zygote	9.03052	16.9964	10.9988	18.4809	1.93061	4.07017	0	0.00088671	NA
CCDC122	Morula	3.26749	3.19908	2.9541	2.28311	5.81784	12.8805	5.5298	5.02294	NA
CCDC127	4-cell	6.61643	63.1887	52.708	130.862	7.53306	27.1688	5.66314	5.26752	NA
CCDC132	Oocyte	18.1241	10.6659	6.80835	10.0943	1.33668	2.62275	0.931999	3.02519	NA
CCDC142	8-cell	0.953107	1.44907	1.59397	1.2593	7.62284	9.13069	4.18805	7.50895	NA
CCDC142	Morula	0.953107	1.44907	1.59397	1.2593	7.62284	9.13069	4.18805	7.50895	NA
CCDC144A	Morula	0.286047	0.213633	0.11456	0.337129	1.11051	3.99378	0.478521	0.162346	NA
CCDC15	Oocyte	188.64	134.87	123.95	58.5471	22.8505	9.33873	0.00533301	0.666683	NA
CCDC21	4-cell	106.673	54.8159	56.7728	77.2589	14.3337	12.292	3.75729	9.14381	NA
CCDC21	Oocyte	106.673	54.8159	56.7728	77.2589	14.3337	12.292	3.75729	9.14381	NA
CCDC23	Oocyte	91.5422	15.3873	11.146	13.7156	11.114	12.4522	7.15537	20.5	NA
CCDC42B	4-cell	12.1702	4.62482	3.55912	11.2978	7.73768	3.22584	4.32004	4.18932	NA
CCDC50	Zygote	4.18558	12.342	6.21321	6.51904	1.15788	0.637263	0.285582	3.037	NA
CCDC51	Blastocytes	5.24572	6.41233	2.29675	6.60744	21.4764	42.0853	23.855	61.8027	NA
CCDC56	Blastocytes	3.26502	3.76133	2.51794	8.79114	3.72567	12.3314	91.5757	60.2331	NA
CCDC58	Morula	5.49062	0.796999	3.09214	4.36592	14.7713	38.9835	78.7442	47.2008	NA
CCDC72	Morula	6.45966	21.8593	17.6694	11.4284	130.943	418.085	273.265	186.293	NA
CCDC76	Zygote	11.2293	21.4327	10.2379	8.30027	2.94907	4.10505	1.22289	4.26319	NA
CCDC87	Zygote	0.101128	2.50949	1.15899	2.47913	0.170066	0.0117013	0.00467927	0.000840457	NA
CCDC88C	4-cell	12.9627	17.4301	13.2411	26.0603	3.95587	4.31676	0.0738451	1.43726	NA
CCDC90A	Blastocytes	21.1127	8.81052	4.6022	4.95773	3.32152	6.08918	53.8781	50.9427	NA
CCK	8-cell	14.1197	2.99415	0.679489	2.76622	55.6509	8.22988	0	0	NA
CCL14-CCL15	Morula	0	0	0.00410412	0.00178382	1.20513	10.5768	0	0.0069494	NA
CCL15	Morula	0	0	0	0	0.941549	9.0405	0	0	NA
CCL5	8-cell	5.03315	6.13549	6.97504	4.339	18.5049	32.1674	20.9281	11.6105	NA
CCNA1	8-cell	0.352514	0.198198	0.0534726	13.2164	348.661	58.4695	0	2.26403	NA
CCNA1	Morula	0.352514	0.198198	0.0534726	13.2164	348.661	58.4695	0	2.26403	NA
CCNB1IP1	8-cell	15.8995	11.5055	8.4401	14.5718	90.5867	112.354	64.9806	48.9597	NA
CCNB1IP1	Morula	15.8995	11.5055	8.4401	14.5718	90.5867	112.354	64.9806	48.9597	NA
CCNB2	2-cell	384.08	608.798	673.771	460.509	107.411	78.4577	113.747	130.356	NA
CCNC	Blastocytes	2.17692	2.96196	1.36122	3.69956	33.7889	43.3874	111.885	138.509	NA
CCND2	Zygote	26.7184	46.3916	27.3292	41.1941	12.4655	10.4877	0	0.00287945	NA
CCND3	Blastocytes	12.4235	5.06047	5.6601	3.53044	6.75698	12.4454	31.5172	38.5302	NA
CCNDBP1	Morula	5.52357	6.09932	2.82133	6.21318	25.5545	57.0188	77.89	36.7264	NA
CCNE1	8-cell	69.053	43.7549	38.9186	80.0057	484.766	265.316	31.796	43.9822	NA
CCNI	4-cell	973.574	793.116	1056.91	1678.32	310.802	68.1729	205.356	144.001	NA
CCNJ	Zygote	7.35932	37.096	27.8566	23.4657	6.74086	1.09628	0.873954	0.54742	NA
CCNL1	Morula	24.6104	13.4822	6.65031	4.51867	54.7442	82.9038	21.7374	61.3725	NA
CCNO	4-cell	65.6647	72.3481	85.2486	122.675	55.032	13.1324	0.18846	0.0149778	NA
CCNY	Oocyte	9.99594	4.60743	3.32455	3.11023	2.06329	2.61614	20.5741	19.9974	NA
CCR3	Oocyte	55.4699	24.8591	23.9428	21.2774	2.24063	0.469953	0	0	NA
CCRN4L	8-cell	1.29855	3.45601	2.27876	2.15938	15.6767	4.76433	2.53472	2.22278	NA
CCS	Morula	1.33943	2.89236	2.77134	3.65616	13.9609	38.4718	92.1372	26.2338	NA
CCT2	Blastocytes	186.65	189.721	226.365	144.025	284.596	233.429	473.559	457.077	NA
CCT3	Blastocytes	47.5537	79.814	89.9109	121.531	157.361	189.005	352.354	322.264	NA
CCT4	Blastocytes	44.126	17.8113	14.983	20.6866	25.5074	89.0754	349.702	304.141	NA
CCT5	Blastocytes	8.52645	18.1621	14.8468	24.7042	82.906	137.169	218.894	301.824	NA
CCT6A	Blastocytes	22.5343	5.8143	4.09984	5.21398	136.227	173.234	440.28	545.534	NA
CCT6P1	8-cell	0.0700266	0.08103	0.185587	0.155818	8.45656	4.56824	2.74491	1.32926	NA
CCT7	Blastocytes	3.37354	3.14188	3.60716	5.15265	47.8428	127.34	139.086	195.1	NA
CCZ1	Oocyte	794.422	320.311	291.859	187.585	21.6835	10.9023	44.1474	51.3382	NA
CD164	2-cell	69.623	113.935	119.468	80.8468	35.3549	23.0403	21.2682	71.1883	NA
CD24	8-cell	0.652609	0.304573	0.356859	0.426693	8.34829	2.59313	166.485	225.496	NA
CD24	Blastocytes	0.652609	0.304573	0.356859	0.426693	8.34829	2.59313	166.485	225.496	NA
CD2BP2	8-cell	1.53398	2.59968	1.92499	4.4143	32.4297	25.1627	9.79286	17.4418	NA
CD320	Blastocytes	0.887311	2.63866	0.997428	1.3878	2.9768	21.49	199.334	59.3608	NA
CD38	4-cell	3.70614	9.7709	5.11188	15.0177	2.2727	2.40598	0.0192736	0.0518476	NA
CD46	Blastocytes	0.280396	0.250502	0.187988	0.758663	2.27017	4.4154	2.90417	16.6735	NA
CD53	Blastocytes	0.0293023	0	0	0.0937714	1.93024	5.55175	75.0665	256.256	NA
CD63	Blastocytes	0.839507	0.222593	0.0767123	1.33748	36.2157	56.4739	302.741	216.784	NA
CD68	8-cell	0.212593	0.354901	0.387188	0.844847	7.56061	2.5049	2.67532	0.784025	NA
CD68	Morula	0.212593	0.354901	0.387188	0.844847	7.56061	2.5049	2.67532	0.784025	NA
CD81	Blastocytes	30.0772	14.6744	16.1776	16.065	5.63756	7.56753	528.882	282.965	NA
CD9	Morula	10.6871	48.7	53.6015	90.5265	102.262	178.727	286.525	130.518	NA
CD96	8-cell	0.371926	0.59318	0.681675	0.756548	1.99683	3.63179	1.8298	1.7258	NA
CD97	Blastocytes	0.244768	0.175504	0.206399	0.493666	1.20372	3.39769	13.1688	14.7584	NA
CDADC1	Oocyte	9.0626	3.49159	1.91768	1.46972	1.66529	2.31203	0.0101321	1.65961	NA
CDAN1	8-cell	0.0585597	0.137299	0.117061	0.298919	7.52944	2.63968	1.19256	1.46951	NA
CDC123	Blastocytes	96.9649	36.0874	27.3931	23.4904	28.8849	61.4711	110.137	144.932	NA
CDC23	8-cell	1.88585	1.0656	0.486617	0.271735	25.7076	30.5714	14.4796	8.86132	NA
CDC23	Morula	1.88585	1.0656	0.486617	0.271735	25.7076	30.5714	14.4796	8.86132	NA
CDC40	Oocyte	81.9829	61.7649	57.0837	22.0515	18.3036	7.87587	4.50774	11.9289	NA
CDC42EP1	Morula	0	0	0.0106928	0.00245605	2.07304	20.7892	0.479121	5.25597	NA
CDC42EP2	Morula	0.115248	0.287333	0.24293	0.0805006	3.98713	19.1487	0.0314405	6.76555	NA
CDC45	4-cell	74.4982	30.7078	31.2152	66.8472	7.6873	9.24992	6.22852	4.24551	NA
CDC45	Oocyte	74.4982	30.7078	31.2152	66.8472	7.6873	9.24992	6.22852	4.24551	NA
CDC6	8-cell	7.05742	30.2839	23.7938	54.2364	147.7	73.6424	40.4983	37.1662	NA
CDC7	Zygote	15.0775	38.4997	30.5248	20.767	4.85707	4.82082	22.3928	11.4564	NA
CDCA5	8-cell	10.1987	10.5132	5.39832	9.28069	71.6394	34.8191	28.8047	41.3154	NA
CDCA7L	4-cell	19.9346	64.8547	40.8627	60.1535	13.0363	2.26529	0.219865	0.00321958	NA
CDCA7L	Zygote	19.9346	64.8547	40.8627	60.1535	13.0363	2.26529	0.219865	0.00321958	NA
CDH24	8-cell	0.0639257	0	0.0461084	0.0833786	3.23599	2.94927	0.0334484	0	NA
CDH8	4-cell	4.53616	0.700128	1.01939	3.82534	1.54659	0.107316	0.953665	0.641874	NA
CDIPT	8-cell	3.81292	7.82562	4.85511	7.19386	129.762	164.59	44.2481	60.744	NA
CDK1	8-cell	5.51619	33.6043	16.8253	49.7849	153.674	135.75	120.734	124.38	NA
CDK12	2-cell	30.7711	59.1979	42.1484	32.2026	16.2078	17.892	9.72561	8.62562	NA
CDK12	Zygote	30.7711	59.1979	42.1484	32.2026	16.2078	17.892	9.72561	8.62562	NA
CDK2AP2	Oocyte	445.915	220.698	229.047	301.017	123.558	48.0126	53.8729	21.0455	NA
CDK4	Blastocytes	1.09448	3.37478	1.29104	2.91296	68.1006	98.8217	108.298	91.8976	NA
CDK5R1	8-cell	1.47534	1.54045	0.857042	0.684572	8.96163	3.09089	0.12256	1.72957	NA
CDK6	Blastocytes	0	0	0.000520941	0.108418	0.30032	1.42419	9.36697	27.2369	NA
CDK7	Oocyte	1528.33	603.441	1041.77	1051.35	472.045	96.9114	50.5314	45.2019	NA
CDKN2AIP	8-cell	15.8336	30.4375	18.7679	21.054	233.245	44.0195	23.9601	8.34819	NA
CDKN2D	8-cell	0.247531	0	0.0699868	0.490438	20.2339	11.736	4.8171	9.94778	NA
CDKN3	Blastocytes	0.469024	2.8383	1.67081	5.106	6.24469	18.4334	58.9572	54.7805	NA
CDS1	Oocyte	73.33	45.0412	26.6642	15.1338	6.51629	4.89843	7.18148	18.7228	NA
CDX2	Blastocytes	0	0	0.0719828	0.481384	4.11627	0.155784	5.16491	24.3568	NA
CEBPA	Blastocytes	0.00643781	0.26415	0.0279196	0.00614724	0.578847	0.162446	1.38961	32.8137	NA
CEBPD	Oocyte	3.04972	0.357539	0.257894	0.423033	0.123034	0.103258	0.259709	0.244441	NA
CELA2A	Oocyte	9.55165	2.8112	1.57187	2.11206	0.485033	0	0	0	NA
CELF1	Oocyte	139.265	83.2868	55.4295	22.3495	17.5586	23.3071	21.0643	32.5036	NA
CENPB	Blastocytes	0.0108137	0.0357826	0.0585845	0.0847454	0.45791	0.486315	1.46952	1.61064	NA
CENPK	Oocyte	57.8343	48.555	40.7117	34.098	8.09773	6.78309	6.95795	11.8077	NA
CENPP	Oocyte	70.9273	30.2107	24.5595	31.2256	10.796	2.29427	3.5633	4.98926	NA
CEP170L	4-cell	0.216139	0.420552	0.374643	1.81825	2.74547	0.35061	0.0501195	1.04331	NA
CEP250	Zygote	0.951507	3.96523	2.26466	4.44297	0.981165	0.914077	1.20342	0.16424	NA
CEP55	8-cell	7.84835	25.3816	17.3833	21.0925	39.839	18.2228	9.67442	3.93331	NA
CETN3	Zygote	68.3328	86.3658	48.2893	8.61111	3.00531	10.1818	8.9856	23.7773	NA
CFD	Morula	0.848449	1.19051	1.05406	0.403527	6.9685	24.8583	0.0637622	1.42303	NA
CFL1	Blastocytes	248.607	298.123	336.343	358.478	546.866	539.226	686.704	730.195	NA
CFL2	Morula	1.90951	8.22635	3.14211	6.13762	31.2977	72.4655	9.74383	27.1606	NA
CGREF1	Zygote	11.4616	34.9845	21.626	21.0508	11.1237	9.32705	0.245063	0.56184	NA
CHAF1B	Oocyte	62.0306	31.1386	17.9125	33.9317	17.7994	14.4978	5.27762	27.339	NA
CHCHD1	Blastocytes	30.3397	16.827	16.1448	15.948	32.0054	121.701	193.582	261.859	NA
CHCHD2	Blastocytes	309.52	136.648	157.737	173.312	465.583	757.986	539.152	647.047	NA
CHCHD2	Morula	309.52	136.648	157.737	173.312	465.583	757.986	539.152	647.047	NA
CHCHD3	Blastocytes	8.53553	32.321	28.3517	46.4776	18.8525	9.24522	216.436	148.198	NA
CHCHD4	Blastocytes	0.0207954	0.899911	0.390136	0.192434	1.33855	23.0877	49.8872	64.237	NA
CHCHD4	Morula	0.0207954	0.899911	0.390136	0.192434	1.33855	23.0877	49.8872	64.237	NA
CHCHD8	Blastocytes	45.2594	21.8563	21.1629	54.9107	42.9728	88.8281	135.325	192.232	NA
CHD2	Oocyte	51.7434	33.1196	26.4621	24.2634	16.7139	8.29263	6.33195	4.98984	NA
CHD4	Oocyte	95.83	71.3325	73.7836	84.6652	16.7989	27.6882	16.1515	26.6391	NA
CHD7	Oocyte	60.4801	51.7379	47.9067	25.7392	12.9496	14.2529	3.55148	11.9678	NA
CHEK1	2-cell	202.078	236.765	279.674	226.978	39.1109	39.9279	18.5342	22.8951	NA
CHI3L2	Blastocytes	0	0	0	0.250222	3.09637	5.00605	18.3499	29.2682	NA
CHML	8-cell	0.157228	0.469392	0.176308	0.633255	5.27343	10.5169	1.70559	3.87397	NA
CHML	Morula	0.157228	0.469392	0.176308	0.633255	5.27343	10.5169	1.70559	3.87397	NA
CHMP1A	8-cell	0.828461	2.62028	1.93794	3.4898	79.7671	39.9607	6.93257	19.3692	NA
CHMP1A	Morula	0.828461	2.62028	1.93794	3.4898	79.7671	39.9607	6.93257	19.3692	NA
CHMP2A	Blastocytes	2.96131	2.03393	0.686002	1.66643	12.7581	73.0853	32.5864	39.919	NA
CHMP2A	Morula	2.96131	2.03393	0.686002	1.66643	12.7581	73.0853	32.5864	39.919	NA
CHMP4A	Blastocytes	0.402588	0.343963	0.141751	1.47898	0.632992	0.907007	25.3242	26.3148	NA
CHMP5	Morula	39.7798	18.3542	11.7643	32.9383	86.6043	95.0729	26.4697	55.5348	NA
CHMP7	Oocyte	29.0888	12.9474	8.07653	10.543	10.3775	7.10976	10.3863	5.80082	NA
CHN2	Oocyte	22.1701	15.8195	12.1318	16.0613	1.37897	1.72768	5.34507	0.352907	NA
CHP	Blastocytes	7.41155	16.496	14.2558	21.7299	51.4281	41.333	113.104	75.41	NA
CHRDL1	Oocyte	4.00619	2.71854	1.25537	0.0282918	0.0880083	0.00322862	0.0200131	0.0177598	NA
CHRFAM7A	Oocyte	22.6538	9.23933	4.88091	7.93429	4.36902	1.38246	0	0.00180962	NA
CHRNA7	Oocyte	25.2488	11.5602	6.09538	7.70431	4.7928	1.51906	0.0643568	0.373257	NA
CHRNB1	8-cell	0.588556	0.678134	0.493494	0.647581	27.3411	50.9124	1.44726	3.99953	NA
CHRNB1	Morula	0.588556	0.678134	0.493494	0.647581	27.3411	50.9124	1.44726	3.99953	NA
CHST6	Morula	0.0848969	0.150205	0.228525	0.354704	0.822044	2.91314	0.39136	0.382491	NA
CHSY1	Zygote	8.1771	23.1701	10.9367	14.3421	2.50013	3.10778	1.68573	4.40628	NA
CHUK	Oocyte	16.7676	11.2858	5.48635	2.97708	1.88336	2.43667	4.55481	11.0295	NA
CIAO1	Blastocytes	11.1129	6.37675	3.45043	4.2716	11.4412	23.4802	58.1785	47.2227	NA
CIAPIN1	Oocyte	115.962	58.1581	50.1866	73.9733	28.0066	25.1042	32.4756	38.0797	NA
CINP	Blastocytes	2.57574	3.6068	1.47848	4.54374	16.6506	64.0982	38.0112	49.8346	NA
CINP	Morula	2.57574	3.6068	1.47848	4.54374	16.6506	64.0982	38.0112	49.8346	NA
CISD1	Oocyte	127.462	49.5333	45.4766	29.7513	54.4924	62.3845	91.277	64.6488	NA
CKAP5	Oocyte	79.2211	41	44.9478	39.9987	20.2095	15.9602	22.1701	19.3393	NA
CKMT1A	8-cell	0	0	0	0.135451	5.80691	3.26344	3.72939	0.887226	NA
CKMT1B	8-cell	0	0	0	0.157976	4.87203	3.53041	5.52345	0.498845	NA
CLC	8-cell	0	0	0	0.113671	26.4249	22.1687	0	0.00547629	NA
CLC	Morula	0	0	0	0.113671	26.4249	22.1687	0	0.00547629	NA
CLDN10	Oocyte	8.68794	2.58966	2.19618	1.92766	1.0592	0.84071	201.139	545.674	NA
CLDN12	2-cell	25.4509	43.624	45.8892	22.2073	4.23922	7.90265	8.59401	6.7153	NA
CLDN18	Oocyte	28.4001	14.4267	13.4466	8.84107	1.10703	0.120796	0	0.225983	NA
CLDN4	Blastocytes	0.0331444	0.0291921	0.0475915	0.922289	0.0836468	0.0985	18.7814	194.862	NA
CLDN7	Blastocytes	0.0589171	0.0264881	0.0538224	0.194467	2.69016	19.1052	51.089	80.127	NA
CLDN7	Morula	0.0589171	0.0264881	0.0538224	0.194467	2.69016	19.1052	51.089	80.127	NA
CLEC10A	Oocyte	422.897	63.9159	37.2549	40.2485	6.55558	0.0164773	0.0154072	0	NA
CLEC2D	Blastocytes	14.2155	12.742	18.6787	15.5608	26.0021	48.8836	41.7873	44.2812	NA
CLEC2D	Morula	14.2155	12.742	18.6787	15.5608	26.0021	48.8836	41.7873	44.2812	NA
CLIC1	Blastocytes	5.25219	0.933827	0.253186	2.97529	1.88245	1.99206	289.225	228.303	NA
CLIP3	4-cell	2.89892	4.09258	3.51494	13.2732	4.62192	0.934427	0.00814296	0.0222174	NA
CLK2	Oocyte	44.2929	27.7752	12.8888	14.2434	17.7534	9.2965	11.7861	4.85984	NA
CLK4	8-cell	2.90726	1.60584	0.58368	1.21023	102.562	70.1922	8.56898	6.60993	NA
CLMN	Oocyte	4.11449	3.28834	1.74084	1.16943	0.130717	0.187123	0.00748807	0.400507	NA
CLN3	Blastocytes	5.62099	6.04334	3.8359	3.95697	1.40456	7.28234	51.7353	28.7977	NA
CLNS1A	Blastocytes	25.547	22.6406	19.7428	28.0462	33.3796	49.3778	138.978	166.176	NA
CLP1	8-cell	6.91492	8.3907	4.76759	6.51549	149.81	70.9226	22.4294	35.5339	NA
CLPB	8-cell	0.683243	1.71712	0.986858	2.1805	13.4002	7.8071	4.62917	8.2448	NA
CLPS	4-cell	18.2644	6.72017	11.4786	29.8965	5.73182	3.72594	0.0252976	0.172749	NA
CLPX	4-cell	94.4074	102.806	79.7973	153.414	88.5427	123.829	54.5259	48.5981	NA
CLSTN1	Oocyte	45.7067	25.9076	26.5802	26.4338	11.3743	8.14835	3.19296	2.07083	NA
CLTA	Blastocytes	84.793	85.3492	68.8126	76.8236	54.5115	98.3035	127.919	208.605	NA
CLTC	Blastocytes	6.41939	10.7132	9.37489	14.635	8.83397	9.15131	45.4033	83.7671	NA
CLUAP1	4-cell	25.5094	26.968	18.3852	46.0819	5.56427	4.22164	23.1588	5.51204	NA
CMC1	Blastocytes	9.67882	5.3018	4.51082	7.82873	3.69863	8.86465	84.7169	59.7667	NA
CMTM8	Oocyte	54.5076	30.1631	13.4279	12.3463	2.73099	1.58386	9.12169	13.3909	NA
CNIH4	Blastocytes	14.934	20.611	18.3379	23.0316	32.2448	39.1093	437.597	220.591	NA
CNKSR1	Morula	0.333002	0.163203	0.0896674	0.471445	4.30157	7.45291	0	0.00701477	NA
CNN1	4-cell	8.80928	6.58102	4.9239	14.8381	4.31667	0.647618	0	0.00154419	NA
CNN2	Morula	0.0521158	0.0575273	0.03319	0.033393	1.34927	8.38987	32.7073	4.26833	NA
CNNM1	Oocyte	2.19425	1.23902	0.849242	0.20094	0.347982	0.306745	0.0458815	0.0844835	NA
CNNM2	4-cell	73.0102	258.525	342.387	494.941	229.362	23.9398	1.47216	2.91519	NA
CNNM3	Blastocytes	1.3195	1.1054	1.14495	0.830389	1.24194	4.00723	6.42066	11.652	NA
CNOT2	Oocyte	171.837	100.071	57.4097	47.2953	49.087	50.9035	42.8318	74.5676	NA
CNOT8	Zygote	44.0268	76.792	49.9775	47.3118	28.6038	21.6134	15.6345	14.0656	NA
CNPY2	Blastocytes	2.12069	4.76202	2.48868	2.76042	6.05537	8.81142	85.5102	83.104	NA
CNPY4	8-cell	0.478145	0.4115	0.525111	2.55672	37.951	20.6217	0.117411	0.351414	NA
CNPY4	Morula	0.478145	0.4115	0.525111	2.55672	37.951	20.6217	0.117411	0.351414	NA
CNRIP1	Oocyte	147.107	104.849	73.2043	55.7223	24.4161	7.53884	0	0.304296	NA
CNTD2	Oocyte	82.2897	27.4391	17.2454	9.80796	1.07946	0.509428	0	0.00269724	NA
CNTN4	Oocyte	12.0874	4.87526	3.32795	5.16868	1.15517	2.35166	0.00540872	0.0016512	NA
CNTN5	Oocyte	20.9307	4.4324	7.56295	7.78141	2.37346	0.217471	0	0.0023381	NA
COBL	Blastocytes	0.315002	0.925492	0.637224	1.25752	0.594401	1.01014	7.33545	27.5593	NA
COL12A1	Oocyte	8.31107	2.74201	0.703997	0.786183	0.480823	0.0376963	0	0	NA
COL23A1	4-cell	0.488136	0.990844	0.648145	5.0189	1.19451	0.0346886	0.161024	0.308164	NA
COL6A1	8-cell	0.0685046	0.148336	0.121366	0.383531	6.3795	5.36832	9.83067	0.7648	NA
COMMD10	Oocyte	140.441	119.985	57.3673	23.6297	4.40027	6.77347	14.8143	16.9048	NA
COMMD10	Zygote	140.441	119.985	57.3673	23.6297	4.40027	6.77347	14.8143	16.9048	NA
COPG	4-cell	5.19743	11.3005	9.85122	22.4034	5.29808	1.92325	7.6087	8.38316	NA
COPS7A	8-cell	1.58457	4.01524	3.59825	6.54774	19.3205	22.0789	5.61042	10.3925	NA
COPS7B	4-cell	15.6063	70.0527	64.0238	122.99	38.1989	19.4161	14.3388	9.92489	NA
COPZ1	Blastocytes	4.97013	8.32571	4.29415	3.68079	10.6081	75.4235	59.165	69.2371	NA
CORO1A	8-cell	0	0.400705	0.118601	1.20261	12.5029	33.5584	1.44272	0.8629	NA
CORO1A	Morula	0	0.400705	0.118601	1.20261	12.5029	33.5584	1.44272	0.8629	NA
CORO1C	Blastocytes	3.70068	16.2683	9.22186	11.6889	47.4338	34.1049	51.6424	72.7903	NA
COX10	4-cell	6.52334	19.9897	18.1761	30.896	15.3569	10.7478	7.52902	10.0339	NA
COX11	Blastocytes	3.94843	5.87943	3.51753	3.48726	2.2877	8.30771	76.6169	48.4551	NA
COX4I1	Blastocytes	158.13	59.3947	45.9779	139.311	242.911	236.442	886.451	679.605	NA
COX5A	Blastocytes	3.38957	7.7037	3.60665	5.78211	31.4858	74.0995	298.791	333.25	NA
COX5B	Blastocytes	100.955	40.773	38.9311	94.4114	209.75	164.244	434.371	244.571	NA
COX6A1	Blastocytes	247.696	69.4896	67.8819	151.359	323.721	523.2	702.15	443.715	NA
COX6B2	8-cell	0.292962	0.223424	0.451636	0.734062	5.94255	4.87585	1.29126	1.91724	NA
COX6B2	Morula	0.292962	0.223424	0.451636	0.734062	5.94255	4.87585	1.29126	1.91724	NA
COX7A2	Blastocytes	64.7135	42.5844	41.2403	58.5568	64.4995	74.5587	232.711	175.01	NA
COX8A	Blastocytes	92.4247	33.1141	40.8653	56.0888	86.0626	93.1893	392.403	188.822	NA
CPEB1	Oocyte	168.247	93.2064	44.2925	37.9029	7.99807	4.73148	0.0251567	0.144672	NA
CPEB1	Zygote	168.247	93.2064	44.2925	37.9029	7.99807	4.73148	0.0251567	0.144672	NA
CPNE3	Blastocytes	0.133838	0.107842	0.195472	0.0725226	5.2524	5.82421	15.9098	13.8052	NA
CPNE4	Zygote	4.099	7.63231	4.85578	9.36878	1.55077	0.612253	0	0.407146	NA
CPNE9	Zygote	10.9122	40.0612	22.2728	27.3595	7.9042	1.44385	0.0101322	0.512543	NA
CPOX	Morula	0.221258	0.0808354	0.0555478	0.195181	6.73449	10.8094	3.20211	7.72603	NA
CPSF2	Zygote	57.6481	83.2523	46.7463	36.5198	11.6833	13.9894	25.8634	24.2681	NA
CPSF3	4-cell	6.13525	14.3545	7.32909	31.2993	2.77099	5.22177	29.608	45.5057	NA
CPT2	Oocyte	32.97	11.371	7.28583	4.44741	1.85436	1.05497	9.506	11.2416	NA
CPVL	Blastocytes	2.95177	5.60054	2.56289	4.6398	2.23788	0.869236	63.7475	53.1099	NA
CRB3	Blastocytes	1.05848	1.85913	1.35155	0.929816	1.00409	10.679	14.0255	25.2108	NA
CREB3L2	Oocyte	25.8513	21.2643	12.0964	14.8119	2.6294	0.639564	5.87202	0.539268	NA
CREG1	8-cell	1.18214	1.17936	0.653483	1.13801	11.1208	27.3977	3.57025	2.1598	NA
CREG1	Morula	1.18214	1.17936	0.653483	1.13801	11.1208	27.3977	3.57025	2.1598	NA
CRHBP	8-cell	0.296422	0.36784	0.041434	0.945318	8.56738	12.2471	5.45597	0.0419217	NA
CRIP1	Blastocytes	0.0422893	0.0558698	0	0.134047	0	0.0183019	52.9822	39.7545	NA
CRIPT	8-cell	1.36454	3.08885	2.22515	1.61401	41.0391	33.191	9.53793	14.8721	NA
CRIPT	Morula	1.36454	3.08885	2.22515	1.61401	41.0391	33.191	9.53793	14.8721	NA
CRK	Oocyte	267.405	147.738	109.097	74.6896	112.687	114.312	126.911	85.5366	NA
CRMP1	Oocyte	110.898	40.3238	31.7595	45.2667	8.79116	0.701596	0.0134729	0.0109022	NA
CRX	8-cell	1.49048	1.63985	1.69216	1.66721	5.26131	7.47193	2.66263	7.36486	NA
CRX	Morula	1.49048	1.63985	1.69216	1.66721	5.26131	7.47193	2.66263	7.36486	NA
CRY1	Oocyte	111.788	54.9595	45.3353	43.5205	6.12303	6.95594	9.46377	4.94835	NA
CS	8-cell	52.8324	136.605	155.547	152.257	240.298	121.052	102.717	143.658	NA
CSAG1	8-cell	0	0	0	0.455771	31.1129	30.7674	0	0.00232186	NA
CSAG2	8-cell	0	0	0	0.0941717	6.75392	5.2149	0	0.466208	NA
CSAG3	8-cell	0	0	0	0.105312	6.86993	5.84359	0	0.529261	NA
CSDA	Morula	30.914	31.9094	18.2949	38.8475	25.9836	110.236	81.5261	94.3826	NA
CSDE1	2-cell	335.278	547.979	635.103	363.446	166.771	126.087	178.468	184.876	NA
CSE1L	Blastocytes	16.9722	13.549	8.28447	22.0601	21.4777	37.702	87.6686	142.643	NA
CSF1R	4-cell	17.6807	36.8988	48.6755	102.728	49.5746	8.37806	0.0695136	0.013595	NA
CSNK1E	4-cell	81.028	35.5852	25.8007	62.24	24.7705	26.744	8.67652	14.3701	NA
CSNK1E	Oocyte	81.028	35.5852	25.8007	62.24	24.7705	26.744	8.67652	14.3701	NA
CSNK1G1	Oocyte	41.9383	32.7496	27.3579	17.7863	19.4084	12.0897	5.0322	6.23996	NA
CSNK2A1	Morula	28.0855	56.9948	52.9246	63.9847	59.3302	103.01	43.5214	43.5574	NA
CSPG5	Morula	0	0	0	0	1.37646	2.31681	0	0	NA
CSRNP1	8-cell	0	0	0.022615	0.388145	29.2815	6.18731	2.163	5.12655	NA
CSRP2	Oocyte	419.832	191.64	303.914	171.182	56.1918	62.4362	1.14071	4.84235	NA
CSRP2BP	Blastocytes	0.425725	1.02814	0.626809	2.0536	5.29329	6.84983	12.8911	36.2871	NA
CSTF3	8-cell	5.64579	8.89149	4.8604	5.40269	53.5892	29.3598	19.8757	34.0269	NA
CT47A1	8-cell	0.0929116	0.0314156	0.00523922	0.339287	9.12918	1.60261	0.0155381	0.159502	NA
CT47A10	8-cell	0.0386717	0.0157078	0	0.301418	7.97703	1.43723	0.0160485	0.173344	NA
CT47A11	8-cell	0.0386717	0	0	0.291777	8.07026	1.478	0	0.206162	NA
CT47A2	8-cell	0.0644528	0.0471234	0	0.269779	8.32465	1.53995	0	0.175289	NA
CT47A3	8-cell	0.0569176	0.0157078	0	0.21745	8.02826	1.71295	0	0.145494	NA
CT47A4	8-cell	0.103125	0	0	0.262178	8.16714	1.45825	0	0.133739	NA
CT47A5	8-cell	0.0644528	0.0157078	0	0.27104	8.24313	1.48453	0.0160485	0.138815	NA
CT47A6	8-cell	0.0644528	0	0.00523922	0.291455	9.43414	1.64762	0.0155381	0.175349	NA
CT47A7	8-cell	0	0	0.0220251	0.0385876	1.27289	0.283303	0	0.004944	NA
CT47A8	8-cell	0.0386717	0	0	0.298471	8.63649	1.49576	0	0.15933	NA
CT47A9	8-cell	0.0826987	0.0314156	0	0.309384	8.10201	1.4989	0	0.170701	NA
CT47B1	8-cell	0	0	0.137768	1.20168	32.2474	3.84924	0	0.0040597	NA
CTCF	8-cell	9.89935	12.2856	8.31402	8.10461	113.133	35.1043	22.1895	18.3727	NA
CTCFL	4-cell	17.2096	12.1006	13.1997	28.376	7.88898	7.33476	0	0.0072412	NA
CTDSP2	8-cell	7.32928	6.88667	7.26379	9.41057	22.3389	12.4723	6.32448	8.54465	NA
CTDSPL	Oocyte	73.7974	42.5269	39.1022	42.5007	8.09089	4.04459	4.10093	14.328	NA
CTDSPL2	8-cell	4.89418	7.80784	5.38737	9.02339	18.0267	8.81882	5.31463	5.74747	NA
CTH	Blastocytes	1.10204	1.19983	0.537462	1.17611	1.70769	3.68798	44.8473	32.6724	NA
CTNNAL1	Blastocytes	1.90162	2.03189	1.1799	1.42279	7.75173	7.49078	43.2728	51.1121	NA
CTNNB1	4-cell	27.6046	33.5052	30.8381	72.6178	13.2935	6.99265	6.50663	16.7021	NA
CTNNBIP1	Oocyte	16.4301	5.39971	4.66005	6.90767	2.85765	0.180088	0.238102	0.79654	NA
CTNNBL1	8-cell	4.56071	12.3304	10.568	22.7043	118.853	75.0131	44.2371	31.2216	NA
CTRB1	4-cell	15.117	13.0539	24.8026	139.128	121.166	90.9881	0.0227342	0.221774	NA
CTRB1	8-cell	15.117	13.0539	24.8026	139.128	121.166	90.9881	0.0227342	0.221774	NA
CTRB2	4-cell	29.6603	35.1997	61.9367	255.919	215.92	176.348	0	0.325527	NA
CTSB	Blastocytes	10.6496	30.328	26.4559	40.6077	104.216	283.286	145.553	433.615	NA
CTSC	Oocyte	31.2931	13.3294	8.73568	8.87564	3.57917	10.4735	52.1531	27.9211	NA
CTSD	4-cell	2.38867	3.83244	3.50175	9.49146	2.72491	1.59078	25.0491	39.2801	NA
CTSD	Blastocytes	2.38867	3.83244	3.50175	9.49146	2.72491	1.59078	25.0491	39.2801	NA
CTSF	Morula	0.195501	0.415149	0.228941	0.349404	3.33543	7.80516	13.9202	2.47949	NA
CTSH	4-cell	3.73147	3.68753	3.90656	18.773	3.42573	6.42822	0.227183	16.9481	NA
CTSL1	Blastocytes	19.1924	11.0862	18.139	22.3667	13.6625	43.7808	96.9436	333.371	NA
CUL1	Oocyte	152.368	76.1539	52.0845	76.7155	39.4308	13.2081	22.5353	28.3064	NA
CUL2	8-cell	1.54893	2.22241	1.4363	4.11522	212.609	98.1245	8.71188	19.5091	NA
CUL2	Morula	1.54893	2.22241	1.4363	4.11522	212.609	98.1245	8.71188	19.5091	NA
CUL4A	Blastocytes	5.36051	3.26747	2.12692	3.13273	8.24995	16.6858	23.0474	17.7633	NA
CUL5	2-cell	169.186	161.255	222.902	73.619	37.1214	25.5849	3.93896	6.18051	NA
CWF19L2	2-cell	15.5992	43.3821	52.6919	26.1182	9.71028	8.00697	2.86334	8.12552	NA
CXCL14	8-cell	0	0	0.029429	0.96293	5.61019	1.37792	0.739675	0.749308	NA
CXorf26	Blastocytes	0.539926	0	0.153632	0.895457	75.9076	96.9137	76.3179	154.269	NA
CXorf40A	8-cell	12.6203	27.4557	22.3514	44.3294	75.9569	26.862	9.16066	7.9762	NA
CXorf40B	4-cell	28.4461	56.5849	52.4488	119.687	203.105	74.5334	17.8577	17.1236	NA
CXorf40B	8-cell	28.4461	56.5849	52.4488	119.687	203.105	74.5334	17.8577	17.1236	NA
CXorf49	8-cell	0.0720757	0.0143751	1.05962	0.271351	17.8485	9.0991	4.54759	0.0860874	NA
CXorf49B	8-cell	0.113728	0	0.909915	0.271207	17.6105	9.01059	4.52195	0.0973335	NA
CYB561	Morula	0.584144	0.600437	0.516544	0.439032	3.37909	10.4614	2.35095	3.95226	NA
CYB561D2	Morula	1.33632	1.54981	1.13195	2.45768	4.87465	21.7462	22.4201	18.9395	NA
CYB5A	Oocyte	293.107	79.2521	80.1988	68.1588	20.0714	4.09282	23.9476	55.6577	NA
CYC1	Blastocytes	5.34482	2.85064	1.71777	2.38325	2.86103	9.74818	126.241	166.463	NA
CYLD	Oocyte	20.1738	12.2053	7.4339	8.79817	6.09484	2.20309	0.018692	1.44233	NA
CYP2C18	Oocyte	12.5137	3.20103	1.51181	3.08272	1.99556	0.821827	0.00536193	0.669123	NA
CYP2S1	Blastocytes	2.04643	12.85	10.8201	8.44337	7.15678	19.0238	91.7547	81.1353	NA
CYP46A1	Oocyte	1.83405	0.198506	0.348	0.27272	0.0810639	0	0	0	NA
CYP51A1	Blastocytes	1.43702	2.37715	1.38225	3.73274	11.7582	16.5427	45.6936	119.164	NA
CYTH3	8-cell	0.864892	3.30877	2.61395	4.08606	25.1887	21.9033	3.725	4.34409	NA
DAAM1	Oocyte	376.7	325.249	263.516	138.735	41.1316	25.9784	13.2322	14.7794	NA
DAAM2	4-cell	1.39331	6.79146	6.66986	11.4119	0.729513	0.0199667	0	0.00118238	NA
DAB2	Blastocytes	0	0	0	0.0369289	33.1867	24.3636	36.0612	288.061	NA
DAB2IP	Oocyte	8.24368	5.4804	4.98479	5.47749	1.75305	0.262733	0.72885	0.930157	NA
DAD1	Blastocytes	6.71184	43.5209	37.7327	44.3283	17.3522	40.4199	150.993	136.169	NA
DAG1	Blastocytes	8.01755	6.14391	6.00157	4.85001	10.87	14.8327	25.9711	101.954	NA
DAP3	8-cell	22.7599	27.2991	35.5832	69.7189	118.148	147.1	50.8973	78.4818	NA
DAPP1	Oocyte	25.8172	9.47241	5.41046	2.05616	2.10346	1.63787	0.560086	1.66175	NA
DARS2	Blastocytes	2.13106	2.11029	1.50338	2.8241	2.51416	10.237	17.3306	23.6462	NA
DBF4B	8-cell	0.810098	2.03589	2.26111	2.88246	11.4149	5.91	1.08189	1.26013	NA
DBI	Blastocytes	207.218	61.1909	41.6218	62.4618	164.298	56.6407	282.343	324.745	NA
DBN1	Blastocytes	0.688964	0.884845	0.0561577	1.44832	0.821124	1.58299	21.1272	8.52094	NA
DBP	Morula	0.355051	0.108011	0.2804	0.229522	1.43372	13.7911	0.797234	0.0335495	NA
DBR1	8-cell	0.242242	0.854706	0.210173	5.02066	176.843	85.0315	19.786	14.8406	NA
DBR1	Morula	0.242242	0.854706	0.210173	5.02066	176.843	85.0315	19.786	14.8406	NA
DCAF13	8-cell	27.8167	29.7731	26.4262	42.9003	114.097	136.914	48.3918	44.8315	NA
DCAF4	8-cell	1.81743	3.96401	2.38859	6.30868	24.166	18.6063	8.15517	17.5631	NA
DCHS2	Oocyte	8.17071	3.91885	3.09883	2.89329	0.844408	0.306485	0	0	NA
DCI	Blastocytes	1.98492	1.53949	0.665894	2.45226	7.07411	8.01198	24.8965	29.9392	NA
DCLK2	Oocyte	102.627	65.0899	64.5476	44.5683	6.46145	2.78933	0.00377921	0.00475156	NA
DCLRE1B	8-cell	19.3118	26.9678	16.3948	20.846	59.2738	16.2889	6.9281	4.97262	NA
DCP1A	Oocyte	188.208	104.052	111.576	74.1641	126.995	71.6502	44.0441	38.3822	NA
DCTN2	4-cell	4.4929	5.87472	3.80706	21.0919	12.3106	11.2451	109.818	45.7089	NA
DCTN2	Blastocytes	4.4929	5.87472	3.80706	21.0919	12.3106	11.2451	109.818	45.7089	NA
DCTN6	Blastocytes	15.8755	7.98764	2.68205	5.47035	1.13795	5.90936	39.2051	57.8189	NA
DCUN1D1	4-cell	3.14852	14.9037	7.94721	20.0349	9.70167	11.2367	15.532	14.4707	NA
DDAH2	8-cell	0	0.261337	0.0542436	0.438611	17.3715	14.1311	8.11065	2.13827	NA
DDAH2	Morula	0	0.261337	0.0542436	0.438611	17.3715	14.1311	8.11065	2.13827	NA
DDIT3	8-cell	3.99852	3.09286	2.15876	15.428	105.171	273.772	30.0204	2.81138	NA
DDIT3	Morula	3.99852	3.09286	2.15876	15.428	105.171	273.772	30.0204	2.81138	NA
DDOST	Blastocytes	6.0231	9.39351	6.19271	7.72783	9.96945	8.28864	16.0975	51.5394	NA
DDRGK1	Blastocytes	6.57276	5.51192	3.7769	7.90104	4.96614	7.37752	42.1166	31.902	NA
DDT	Blastocytes	20.7831	12.2762	12.9457	35.9943	46.1639	22.2507	204.995	67.9953	NA
DDTL	8-cell	3.13277	2.1219	2.34069	5.23653	9.93661	5.10328	33.2122	10.3718	NA
DDTL	Blastocytes	3.13277	2.1219	2.34069	5.23653	9.93661	5.10328	33.2122	10.3718	NA
DDX1	Blastocytes	26.8469	51.9606	39.6437	39.7696	28.0462	34.8861	98.9268	146.83	NA
DDX11	Zygote	1.63976	13.0632	6.4316	12.0928	1.49994	0.742968	1.49593	0.445407	NA
DDX17	Blastocytes	8.51279	8.10438	5.31091	5.93305	42.4897	40.8986	89.205	83.0373	NA
DDX20	8-cell	2.56548	15.1406	10.1837	18.5025	44.7565	19.729	15.449	15.5043	NA
DDX24	2-cell	61.8709	73.482	132.481	71.2868	84.3722	36.6656	22.0706	24.1491	NA
DDX26B	8-cell	0	0	0	0.491773	28.7719	2.64344	0	0.462641	NA
DDX31	Morula	0.434089	1.97572	0.933444	3.54515	9.1522	29.3737	14.2287	6.29757	NA
DDX39	8-cell	3.48085	6.14416	4.40178	24.9431	441.004	426.584	131.052	139.983	NA
DDX3X	8-cell	38.3526	59.9482	49.1154	47.7632	217.755	39.1711	27.2907	49.4676	NA
DDX3Y	Morula	0.00358595	0.00486564	0.00145747	0.0163958	27.3093	81.1916	8.12704	33.0715	NA
DDX47	4-cell	57.1188	63.7131	61.7079	127.582	59.0946	28.3846	15.0999	29.5006	NA
DDX49	8-cell	1.02264	2.99003	1.68766	9.23114	124.835	92.8816	29.7347	53.077	NA
DDX5	8-cell	20.0395	67.2361	51.7507	83.9189	790.84	302.438	188.682	183.752	NA
DDX5	Morula	20.0395	67.2361	51.7507	83.9189	790.84	302.438	188.682	183.752	NA
DEAF1	4-cell	37.2766	14.9306	15.1866	30.6572	5.86245	3.65209	0.53936	1.2011	NA
DEAF1	Oocyte	37.2766	14.9306	15.1866	30.6572	5.86245	3.65209	0.53936	1.2011	NA
DEDD	4-cell	23.5844	71.4314	64.689	126.161	32.7369	29.9005	16.4175	8.87345	NA
DEF6	8-cell	0	0	0.00314735	0.0971921	6.50948	7.27628	0.164005	1.46813	NA
DEF8	Blastocytes	0.28051	3.4023	3.71622	3.48549	5.85091	2.76428	15.4622	23.9892	NA
DENR	Blastocytes	0.315615	0.502822	0.405342	0.60845	24.0668	33.046	42.9678	41.9878	NA
DEPDC7	Oocyte	566.916	412.915	316.12	67.4054	25.7833	7.57949	0.124193	0.00542603	NA
DERA	Oocyte	74.4065	34.5262	21.0242	25.9469	7.68328	2.88719	33.8699	27.9948	NA
DERL2	Blastocytes	0.870432	0.673274	0.435415	0.236904	14.2201	55.3224	29.5962	69.3035	NA
DERL2	Morula	0.870432	0.673274	0.435415	0.236904	14.2201	55.3224	29.5962	69.3035	NA
DET1	Oocyte	48.8819	27.022	17.2483	38.8407	10.3651	5.5962	13.377	5.45935	NA
DFFA	Blastocytes	6.24433	5.31957	4.36026	10.097	14.4541	32.5372	58.0255	33.846	NA
DFFA	Morula	6.24433	5.31957	4.36026	10.097	14.4541	32.5372	58.0255	33.846	NA
DFNA5	Zygote	25.4762	44.5587	23.2276	44.8387	2.95301	0.517833	4.03371	0.938212	NA
DFNB31	Oocyte	15.8574	9.26471	8.64513	14.4044	2.26513	0.08116	0	0.000604416	NA
DGAT2	Morula	0.423974	0.784899	0.400052	1.81396	2.41049	10.6836	1.86847	0.0274203	NA
DGCR14	8-cell	0.582557	5.75786	3.85989	8.01853	26.8057	19.5188	5.95349	1.88547	NA
DGKZ	Blastocytes	0.0353752	0.707463	0.661691	1.9419	0.622189	0.62008	6.64261	4.30744	NA
DHCR24	Blastocytes	2.09728	1.51619	1.36682	2.22481	1.8137	3.75802	50.3134	58.1345	NA
DHCR7	Oocyte	81.9619	40.8697	29.6672	36.6887	2.99468	1.91657	44.006	97.1994	NA
DHDH	Morula	0	0	0	0.282178	1.59545	7.68519	0.0265837	0.726338	NA
DHDPSL	8-cell	0.832283	0.940518	1.20115	0.654808	2.01285	2.38153	1.15345	1.25787	NA
DHODH	Morula	1.21917	1.51435	0.665676	0.660853	13.3128	17.4825	3.42923	8.45894	NA
DHRS7	Morula	0	0.0163171	0	0.00776343	2.88894	12.9358	0.644483	6.14249	NA
DHRSX	4-cell	5.58021	6.85427	4.33384	13.168	5.95051	2.41567	19.3326	3.24404	NA
DHX15	8-cell	7.70459	5.38716	4.7126	11.8989	142.373	67.8414	46.2	115.774	NA
DHX40	8-cell	5.94469	9.4155	5.6318	9.72278	25.373	9.02242	0.371728	5.15365	NA
DHX40P1	8-cell	0.879272	1.44517	0.555253	1.56749	4.23708	1.46346	0.0605313	0.687992	NA
DHX8	8-cell	1.9295	7.3979	7.17893	11.1101	27.1747	11.586	5.96525	7.79711	NA
DHX9	8-cell	2.0957	1.38844	0.745603	0.659726	72.3427	46.3331	29.4774	54.5565	NA
DIABLO	8-cell	8.92347	37.6079	25.7593	42.7744	133.18	159.681	38.3122	68.871	NA
DIP2C	4-cell	2.4238	3.12883	2.57219	5.8364	1.896	1.11154	0.109215	1.19611	NA
DIRAS2	Oocyte	1.98144	0.223118	1.74968	0.142209	0.000465871	0	0	0	NA
DIS3	8-cell	0.250494	0.531412	0.394193	0.448019	24.5631	9.14042	6.3489	8.07677	NA
DIS3L	8-cell	4.55637	1.9797	1.24582	1.77564	123.073	76.423	6.56214	27.1044	NA
DIS3L	Morula	4.55637	1.9797	1.24582	1.77564	123.073	76.423	6.56214	27.1044	NA
DLAT	Blastocytes	0.952171	3.52515	1.72681	3.27714	2.73445	11.3592	51.7633	53.1087	NA
DLD	Blastocytes	18.1496	13.3917	10.0912	20.6016	11.6704	14.7425	36.8715	51.5816	NA
DLEU7	8-cell	0	0	0	0	18.3034	11.7393	0	0	NA
DLG3	4-cell	6.06331	13.6273	10.3002	20.1311	2.22334	0.669925	11.5867	8.7049	NA
DLGAP5	2-cell	426.117	961.23	1061.41	469.635	82.6062	40.9711	74.5532	36.8439	NA
DLGAP5	Zygote	426.117	961.23	1061.41	469.635	82.6062	40.9711	74.5532	36.8439	NA
DLK2	Morula	0.742074	0.196128	0.14822	2.02916	2.3522	21.4537	0.00929397	0.00254243	NA
DLST	4-cell	4.94387	24.275	16.2191	35.8289	13.4287	1.41276	0.291799	0.901347	NA
DMRTB1	Oocyte	105.878	40.8745	34.5057	35.6879	9.66306	7.1973	2.87786	0.478277	NA
DMRTC2	Zygote	2.29109	15.8921	8.34186	11.9589	2.11253	0.915065	0	0.00269427	NA
DNAH10	4-cell	42.1512	13.9808	15.9236	26.2897	8.78562	1.02545	0.00199377	0.00565929	NA
DNAH10	Oocyte	42.1512	13.9808	15.9236	26.2897	8.78562	1.02545	0.00199377	0.00565929	NA
DNAH11	Oocyte	50.353	24.012	24.6523	17.8463	3.56272	3.02443	0.0084546	0.0534561	NA
DNAH17	4-cell	0.89954	2.42983	1.49132	3.23007	1.05066	0.220322	0.0302939	0.0371926	NA
DNAH3	Oocyte	23.4778	13.4706	6.72628	16.219	2.02439	1.84488	1.08953	0.392475	NA
DNAJA1	8-cell	809.744	628.933	712.739	619.832	1011.8	649.181	548.009	541.719	NA
DNAJA4	4-cell	3.6662	26.57	15.2112	27.8967	9.68358	1.34986	1.16098	4.29722	NA
DNAJB1	8-cell	7.93054	141.673	167.327	219.063	550.498	353.062	66.3964	70.8075	NA
DNAJB12	8-cell	0.725632	1.4681	1.56127	1.57021	11.6097	11.5179	0.906512	4.02343	NA
DNAJB12	Morula	0.725632	1.4681	1.56127	1.57021	11.6097	11.5179	0.906512	4.02343	NA
DNAJB9	8-cell	9.07138	14.2164	6.75769	7.09157	44.333	19.1905	21.0563	6.86598	NA
DNAJC15	Blastocytes	109.6	65.9296	38.5657	20.1189	306.696	851.704	465.619	1148.5	NA
DNAJC19	Oocyte	100.404	26.5152	13.7171	13.4791	11.6521	10.9067	34.1032	62.9775	NA
DNAJC25-GNG10	Blastocytes	20.7886	10.8159	3.11069	2.23489	1.32843	6.04693	67.804	119.396	NA
DNAJC9	Oocyte	582.151	241.514	289.088	199.491	185.903	168.104	78.1279	112.931	NA
DNAL1	8-cell	1.37068	1.22321	0.904215	1.28347	5.99491	6.30854	1.88138	1.65223	NA
DNAL1	Morula	1.37068	1.22321	0.904215	1.28347	5.99491	6.30854	1.88138	1.65223	NA
DNAL4	Oocyte	80.5878	37.8447	31.0786	27.2383	8.34519	7.66406	0.569062	2.41399	NA
DNASE1	Morula	0.475515	0.346718	0.243364	0.528812	3.92648	2.86012	0.656809	0.55076	NA
DNASE2	Morula	0.12417	0.343395	0.436025	1.27186	8.71928	30.4487	2.14154	7.31842	NA
DNM2	Blastocytes	0.841227	1.30395	0.902938	2.32908	5.24981	6.71192	12.9836	10.0666	NA
DNMT1	2-cell	1796.84	2460.19	4259.97	2440.09	469.615	301.265	4.3936	2.3861	NA
DNMT3B	Blastocytes	77.9025	59.0473	44.4169	48.5539	3.71198	5.54177	200.931	178.164	NA
DNMT3L	Blastocytes	0	0	0	0.229971	8.81327	23.1392	986.327	1069.79	NA
DNMT3L	Morula	0	0	0	0.229971	8.81327	23.1392	986.327	1069.79	NA
DNPEP	8-cell	1.18784	1.93611	1.46443	4.07189	14.8412	8.86241	7.35195	2.13855	NA
DOK4	8-cell	0.127476	0.328181	0.120383	0.387015	6.86777	3.85588	0.0144115	0.24907	NA
DOK5	Oocyte	17.7905	8.52834	6.00481	22.7819	4.05549	0.446788	0	0.00133684	NA
DOPEY2	Oocyte	12.4754	7.46379	4.86267	6.6545	2.70242	1.36079	0.333132	2.54092	NA
DOT1L	4-cell	0.221419	3.53349	2.81779	7.00217	2.99915	1.04252	1.28084	1.00859	NA
DPAGT1	Blastocytes	0.689374	5.49254	3.00255	1.82749	2.92274	5.69826	8.18502	22.3008	NA
DPF1	Oocyte	19.1266	8.91661	4.35802	15.9897	1.47169	0.480411	4.40797	0.33971	NA
DPF2	Oocyte	206.197	88.692	83.8149	80.446	8.19952	14.9368	29.8827	9.99236	NA
DPH1	Blastocytes	0.10905	0.556507	0.377537	0.754985	3.51045	10.6728	9.4481	13.0879	NA
DPH1	Morula	0.10905	0.556507	0.377537	0.754985	3.51045	10.6728	9.4481	13.0879	NA
DPH3	8-cell	1.69004	3.65562	3.18543	2.45786	46.8208	55.7677	18.7201	28.3513	NA
DPH3	Morula	1.69004	3.65562	3.18543	2.45786	46.8208	55.7677	18.7201	28.3513	NA
DPH3P1	Oocyte	47.2141	22.6925	17.4248	11.5267	2.34045	3.59172	13.0599	1.23567	NA
DPH5	Blastocytes	1.86491	8.26443	3.42598	6.93422	2.8281	8.76214	10.0462	24.8899	NA
DPP10	Zygote	1.94894	3.17479	2.11668	2.22004	0.90965	0.0189944	0	0	NA
DPP3	Oocyte	30.3931	13.334	11.8946	16.2909	5.3056	1.01419	7.36312	8.4635	NA
DPP9	Blastocytes	2.54037	3.32016	2.47587	3.80294	2.36924	7.54486	11.838	13.3642	NA
DPPA2	8-cell	0	0	0	0.272676	45.8969	71.6139	84.351	27.388	NA
DPPA2	Morula	0	0	0	0.272676	45.8969	71.6139	84.351	27.388	NA
DPPA3	2-cell	3492.78	5150.11	10908	4978.6	4094.71	6272.58	891.403	2363.13	NA
DPPA4	Blastocytes	0.0575995	0.0610502	0.0311577	0.23452	14.1986	27.4079	19.849	33.8062	NA
DPRX	8-cell	11.5689	5.35701	7.53673	6.81256	212.494	663.992	0	2.36748	NA
DPRX	Morula	11.5689	5.35701	7.53673	6.81256	212.494	663.992	0	2.36748	NA
DPY19L3	4-cell	2.74845	10.621	5.2765	12.7119	4.10749	0.911592	0.523874	2.4384	NA
DPY30	Oocyte	237.792	121.752	114.812	107.758	26.7684	52.4128	94.5392	98.5901	NA
DRAM1	8-cell	0.328892	0.279826	0.263883	0.310955	16.5853	37.108	0.038054	2.28918	NA
DRAM1	Morula	0.328892	0.279826	0.263883	0.310955	16.5853	37.108	0.038054	2.28918	NA
DRG1	Morula	5.33688	25.6399	23.4917	71.4517	110.82	245.78	95.1332	125.939	NA
DRG2	Blastocytes	0.87135	2.71816	1.67266	5.9776	9.54716	19.2294	38.8542	45.2852	NA
DSC2	Blastocytes	0	0	0	0.00303551	1.3761	1.18	8.84103	13.2772	NA
DSEL	8-cell	0.0981568	0.0809977	0.146969	0.165337	2.6958	2.41505	1.82621	0.346388	NA
DSG2	Blastocytes	2.53338	2.42323	2.18871	2.74707	3.29028	8.29098	16.4292	48.4577	NA
DSN1	Oocyte	121.176	66.2554	39.8713	29.3549	14.8763	16.5499	24.8352	38.1035	NA
DSP	Blastocytes	0.0882211	0.0737061	0.046664	0.134136	0.367828	2.24153	14.2123	30.1347	NA
DTX2	4-cell	63.4404	20.4088	20.7442	42.9683	9.523	6.30643	0.172895	5.45867	NA
DTX2	Oocyte	63.4404	20.4088	20.7442	42.9683	9.523	6.30643	0.172895	5.45867	NA
DTX3	Oocyte	1.1034	0.468109	0.0595081	0.0792628	0	0	0	0	NA
DTYMK	Blastocytes	1.28601	1.19265	0.850291	0.0329099	71.1936	70.6346	138.853	139.737	NA
DUS1L	Blastocytes	2.56775	6.8799	3.32855	5.00434	3.93047	13.6157	27.3264	48.6914	NA
DUSP10	4-cell	30.1417	30.7663	24.8611	64.3886	3.97984	1.5255	1.43169	0.0125945	NA
DUSP12	8-cell	37.6641	17.8941	9.63356	13.0779	200.303	72.2744	38.357	19.7079	NA
DUSP16	4-cell	6.3402	10.9898	7.2588	15.1103	3.25028	4.03043	13.7528	6.91394	NA
DUXA	8-cell	0.249677	0.256896	0.412606	3.13527	536.98	530.306	0.537871	0.580954	NA
DUXA	Morula	0.249677	0.256896	0.412606	3.13527	536.98	530.306	0.537871	0.580954	NA
DYNC1I2	2-cell	79.2229	145.585	188.531	143.898	16.4979	12.6278	39.4725	47.3746	NA
DYNC1LI1	8-cell	6.55283	9.7922	5.49567	8.44999	60.9595	99.5593	40.3784	30.4236	NA
DYNC1LI1	Morula	6.55283	9.7922	5.49567	8.44999	60.9595	99.5593	40.3784	30.4236	NA
DYNLL1	8-cell	177.188	108.67	103.729	58.7639	571.433	387.394	219.766	168.89	NA
DYNLL2	8-cell	1.91038	11.7355	8.94046	6.25698	111.841	17.1266	1.2201	12.5883	NA
DYNLT3	8-cell	0	0	0	0.0347729	7.15224	3.23205	16.1226	0.558714	NA
DYRK1A	4-cell	7.70518	31.7413	23.5033	30.8337	12.386	8.99314	9.71999	5.75276	NA
DYRK2	8-cell	0.692304	3.48135	2.19201	5.07931	9.75957	4.89214	1.65381	2.0134	NA
DYX1C1	Oocyte	78.6486	69.7229	39.6513	13.7939	15.6622	22.3271	25.3654	21.1777	NA
DYX1C1	Zygote	78.6486	69.7229	39.6513	13.7939	15.6622	22.3271	25.3654	21.1777	NA
DZIP1	Zygote	29.6577	35.1518	17.248	14.5366	6.62078	7.94841	2.26095	8.10999	NA
E2F3	Blastocytes	0.0611099	0.00530925	0.0503841	0.161565	1.66659	4.8286	7.73761	14.7929	NA
E2F3	Morula	0.0611099	0.00530925	0.0503841	0.161565	1.66659	4.8286	7.73761	14.7929	NA
E2F6	8-cell	0.0387279	0.00656854	0.0236349	0.138071	58.1293	47.4583	13.4265	14.276	NA
E2F6	Morula	0.0387279	0.00656854	0.0236349	0.138071	58.1293	47.4583	13.4265	14.276	NA
E4F1	8-cell	0.552892	1.63909	1.57591	2.40428	41.9142	33.8805	19.8998	5.34794	NA
E4F1	Morula	0.552892	1.63909	1.57591	2.40428	41.9142	33.8805	19.8998	5.34794	NA
EBAG9	2-cell	99.0514	160.032	155.865	107.516	20.7007	22.0451	38.0919	32.558	NA
EBAG9	Zygote	99.0514	160.032	155.865	107.516	20.7007	22.0451	38.0919	32.558	NA
EBF1	Oocyte	56.5828	27.3225	17.9177	19.1402	6.0545	1.95605	1.07415	0.00782064	NA
EBP	Blastocytes	192.53	61.6217	65.9534	86.5631	41.0211	33.0075	166.835	207.963	NA
EBP	Oocyte	192.53	61.6217	65.9534	86.5631	41.0211	33.0075	166.835	207.963	NA
EBPL	Oocyte	28.1373	4.06597	2.16332	2.40114	8.11802	2.44655	1.78543	8.6165	NA
ECE2	Blastocytes	0.145905	0.127905	0.0941561	0.173579	4.22414	15.809	7.37708	11.4538	NA
ECE2	Morula	0.145905	0.127905	0.0941561	0.173579	4.22414	15.809	7.37708	11.4538	NA
ECHS1	Blastocytes	8.36148	14.3205	10.1782	22.8791	8.12524	9.54877	84.1567	122.11	NA
ECSIT	Blastocytes	4.89117	9.13206	7.53931	16.9083	21.4328	33.7331	38.0703	42.0778	NA
EDF1	Blastocytes	33.983	16.412	21.8258	48.9894	78.021	64.1067	164.522	175.088	NA
EED	8-cell	0.00639094	0.143115	0.233987	0.0732118	20.0907	17.7771	22.2151	11.0022	NA
EED	Morula	0.00639094	0.143115	0.233987	0.0732118	20.0907	17.7771	22.2151	11.0022	NA
EEF1A1	Blastocytes	1603.6	1354.38	2287.83	4633.43	5452.79	7431.56	8198.03	7866.61	NA
EEF1A1P9	Blastocytes	16.2024	7.79062	15.7477	103.647	48.5731	98.198	323.516	409.728	NA
EEF1B2	Blastocytes	230.431	179.637	158.548	620.774	534.635	541.006	1031.92	777.064	NA
EEF1D	Blastocytes	13.1928	11.2528	10.5424	31.4702	33.2574	47.6026	57.908	53.6582	NA
EEF2	4-cell	44.9989	47.0035	67.19	123.943	145.093	65.9848	52.3215	37.5839	NA
EEF2	8-cell	44.9989	47.0035	67.19	123.943	145.093	65.9848	52.3215	37.5839	NA
EEF2K	4-cell	7.43027	14.903	12.6662	18.864	3.44936	1.31572	0.359898	1.96084	NA
EEPD1	Oocyte	29.1472	10.1548	4.91733	11.1958	1.71239	0.650736	0.0161945	0.445996	NA
EFCAB10	4-cell	22.8851	51.3206	49.9495	96.0777	28.791	1.62432	1.27943	1.58756	NA
EFNA1	Blastocytes	0.0490558	0	0.0101144	5.51011	2.95981	1.10064	14.6402	155.398	NA
EFNB2	Oocyte	59.8144	25.1327	17.8472	23.1858	8.96295	2.23369	5.48274	7.3639	NA
EFNB3	Morula	0.261634	1.05217	0.717877	1.96847	11.2865	24.4752	4.27456	0.00187841	NA
EGFL8	Morula	0.0394031	0.0387782	0.0957082	0.00418051	0.193252	9.495	0.256603	4.03958	NA
EHD1	4-cell	0.633671	10.2243	7.90264	13.4911	5.61269	5.87049	1.59852	7.64034	NA
EHD4	Blastocytes	0.0821862	0.574081	0.223001	0.485855	1.84419	2.89419	12.1764	47.6125	NA
EHMT1	Oocyte	39.0391	25.9408	20.9402	28.4001	5.44141	3.65615	4.37163	7.90792	NA
EID3	Morula	16.6562	19.2536	10.9362	16.9414	97.3535	134.168	0.668724	0.58919	NA
EIF1	8-cell	1328.62	912.229	1205.92	1079.16	2196.77	2458.51	966.285	855.033	NA
EIF1AD	8-cell	0.545528	0.934376	0.788303	1.68958	112.498	54.7999	4.57489	7.89246	NA
EIF1AD	Morula	0.545528	0.934376	0.788303	1.68958	112.498	54.7999	4.57489	7.89246	NA
EIF1AY	Blastocytes	0.0331418	0.0191462	0.0101164	0.00572901	8.62939	39.34	30.3888	67.2903	NA
EIF1AY	Morula	0.0331418	0.0191462	0.0101164	0.00572901	8.62939	39.34	30.3888	67.2903	NA
EIF1B	8-cell	88.8708	123.512	129.533	104.244	531.267	550.812	80.1816	229.973	NA
EIF1B	Morula	88.8708	123.512	129.533	104.244	531.267	550.812	80.1816	229.973	NA
EIF2B2	Blastocytes	3.37466	4.87513	3.51896	10.945	35.2476	33.222	31.1746	56.0279	NA
EIF2B4	Blastocytes	1.57726	3.70419	2.25149	4.94318	5.53231	4.58072	26.6616	41.7347	NA
EIF2B5	Blastocytes	0.374051	1.07893	0.721964	2.89538	4.21591	6.65183	36.161	19.036	NA
EIF2S2	Blastocytes	84.1961	150.427	83.9262	38.4547	221.17	452.853	224.84	301.137	NA
EIF2S3	Blastocytes	10.7718	11.8916	9.29117	37.5109	51.4418	50.2318	56.3938	72.8226	NA
EIF3C	Blastocytes	12.7171	14.6709	24.9766	59.3448	107.114	106.103	194.299	117.346	NA
EIF3CL	Blastocytes	6.41096	7.28181	12.3747	29.5312	53.8976	53.4812	98.1195	59.2931	NA
EIF3D	Blastocytes	12.0732	8.62096	5.05646	19.7108	78.0682	202.611	157.363	210.188	NA
EIF3D	Morula	12.0732	8.62096	5.05646	19.7108	78.0682	202.611	157.363	210.188	NA
EIF3E	Blastocytes	168.788	133.01	120.725	101.131	155.772	330.669	449.933	697.311	NA
EIF3E	Morula	168.788	133.01	120.725	101.131	155.772	330.669	449.933	697.311	NA
EIF3F	4-cell	419.728	268.457	373.259	923.351	910.091	535.272	465.287	382.409	NA
EIF3J	8-cell	10.1509	25.2817	16.616	7.62963	189.025	178.532	59.7789	97.2333	NA
EIF3J	Morula	10.1509	25.2817	16.616	7.62963	189.025	178.532	59.7789	97.2333	NA
EIF3L	8-cell	130.45	99.7618	105.981	320.322	561.938	549.656	333.033	359.563	NA
EIF3L	Morula	130.45	99.7618	105.981	320.322	561.938	549.656	333.033	359.563	NA
EIF3M	Blastocytes	43.4407	52.5781	74.6201	91.6685	221.7	280.544	349.646	508.16	NA
EIF4A1	Blastocytes	17.7939	10.8389	6.12579	29.2931	729.224	889.406	724.885	1025.56	NA
EIF4A2	4-cell	294.655	439.674	580.983	945.032	618.177	306.344	203.344	243.362	NA
EIF4A3	8-cell	3.25302	2.8064	1.95934	17.0472	676.14	192.722	107.331	100.304	NA
EIF4A3	Morula	3.25302	2.8064	1.95934	17.0472	676.14	192.722	107.331	100.304	NA
EIF4E2	Blastocytes	7.43415	17.6632	14.272	23.0178	30.7539	119.608	123.79	112.723	NA
EIF4E2	Morula	7.43415	17.6632	14.272	23.0178	30.7539	119.608	123.79	112.723	NA
EIF4EBP1	Blastocytes	0.377164	5.90892	4.43935	8.15895	7.86666	58.6315	117.495	125.417	NA
EIF4EBP2	Blastocytes	0.346674	1.0488	0.534744	0.848123	4.38523	7.49677	66.2933	27.0524	NA
EIF4ENIF1	4-cell	96.7771	131.22	114.552	182.152	32.4468	29.7822	6.76697	9.91831	NA
EIF4G1	Morula	11.9974	13.6714	9.24438	14.2499	87.284	108.406	54.6965	74.0559	NA
EIF4H	Blastocytes	89.0087	81.1703	70.9826	62.2659	98.4419	178.608	192.52	355.182	NA
EIF5	8-cell	80.0751	66.554	58.2503	56.2569	413.922	252.224	105.842	125.731	NA
EIF5	Morula	80.0751	66.554	58.2503	56.2569	413.922	252.224	105.842	125.731	NA
EIF5A	Blastocytes	12.219	13.6427	14.2439	13.1433	69.0973	51.4132	117.472	129.72	NA
EIF5A2	8-cell	0.199525	0.109843	0.13352	0.509263	13.0759	10.4131	1.65518	1.1863	NA
EIF5A2	Morula	0.199525	0.109843	0.13352	0.509263	13.0759	10.4131	1.65518	1.1863	NA
EIF5AL1	Blastocytes	0.315947	0.293562	0.392102	0.3279	1.49555	1.11841	2.40304	3.20234	NA
EIF5B	Oocyte	323.815	443.229	211.281	51.1506	156.066	127.105	58.3549	131.613	NA
EIF5B	Zygote	323.815	443.229	211.281	51.1506	156.066	127.105	58.3549	131.613	NA
EIF6	Blastocytes	5.14206	10.7604	8.06587	16.0101	76.9562	172.815	102.428	126.946	NA
ELAVL1	Oocyte	58.9092	29.9221	19.0008	39.1793	5.86702	5.48863	22.8625	19.0011	NA
ELAVL2	Zygote	16.9879	34.5844	9.70359	8.63218	2.85366	4.62491	0	0.00793384	NA
ELF3	Blastocytes	0.0146253	0	0.0591403	1.485	0.0566475	5.72998	46.0979	65.7653	NA
ELL2	8-cell	3.71919	3.98288	2.47935	4.00063	26.2376	11.9375	2.66022	5.5147	NA
ELL3	8-cell	0.156106	0.475184	0.118561	0.390837	41.9079	35.8793	0	0.807689	NA
ELL3	Morula	0.156106	0.475184	0.118561	0.390837	41.9079	35.8793	0	0.807689	NA
ELMO1	4-cell	21.4967	25.5345	22.4091	58.6428	21.2783	2.18114	1.78347	1.34166	NA
ELP2	Blastocytes	2.07261	1.41439	1.24944	3.3152	9.82326	14.7545	14.9543	22.8057	NA
ELP3	4-cell	3.40634	33.4167	21.1416	43.7254	11.4537	15.0222	6.04426	13.9189	NA
EMILIN2	4-cell	5.11687	20.665	17.7769	33.6341	4.75126	9.54033	0.214035	7.34558	NA
EML1	4-cell	2.20157	5.51105	3.15503	9.44647	2.54855	0.129158	0	0.000641084	NA
EMP2	Blastocytes	1.70161	2.50153	3.27482	5.6214	1.4723	4.28428	8.89344	46.0468	NA
EMX1	Oocyte	88.5422	16.6401	23.0885	45.3506	3.43237	0.219187	0.0124638	0.00316507	NA
ENG	4-cell	8.12331	31.9355	30.8522	48.859	13.5952	1.48998	0	0.000766539	NA
ENO1	Blastocytes	1.71889	8.47001	7.58099	19.8207	340.13	859.02	1461.09	1276.24	NA
ENO2	8-cell	0	0	0.00624411	0.0893373	35.635	40.7633	15.7871	1.48272	NA
ENO2	Morula	0	0	0.00624411	0.0893373	35.635	40.7633	15.7871	1.48272	NA
ENPEP	Blastocytes	0.169371	0.140534	0.0709582	0.197349	0.119162	0.00241102	1.94669	40.2358	NA
ENTPD1	Blastocytes	0.214639	0.524973	0.293952	0.672141	0.475161	2.46254	4.75347	10.7419	NA
ENTPD4	Morula	4.92712	4.44201	2.87592	3.4652	5.83904	13.5088	5.75328	15.1027	NA
ENTPD6	Blastocytes	0.315063	0.842822	0.566239	0.727568	0.144609	0.920908	19.9206	11.3202	NA
ENY2	Oocyte	254.098	94.7233	100.218	88.0167	66.591	51.4208	17.0756	29.8808	NA
EPB41L2	2-cell	10.9955	28.5359	40.2101	53.136	20.5435	24.0131	2.6259	2.55238	NA
EPB41L2	4-cell	10.9955	28.5359	40.2101	53.136	20.5435	24.0131	2.6259	2.55238	NA
EPB49	Zygote	2.20255	10.3397	3.40211	4.80503	0.935395	0	0.0147569	0	NA
EPC1	Oocyte	239.332	120.843	127.781	40.6663	10.0181	9.33346	9.45851	9.65598	NA
EPCAM	Blastocytes	62.9294	49.838	34.3842	30.6064	17.0292	8.44275	251.789	261.884	NA
EPHB1	4-cell	17.2141	17.7774	15.224	41.9688	3.19662	0.507215	0.0295613	0.0100715	NA
EPHB4	Morula	0	0	0.00497818	0.0823588	1.55048	4.34739	2.96025	0.823598	NA
EPHX1	Zygote	1.3767	3.35227	1.96384	4.81624	0.454917	0.0907231	0.289654	0.202207	NA
EPHX4	8-cell	0.303925	0.436506	0.0937299	0.161562	14.0394	4.18413	0	0.119891	NA
EPOR	8-cell	0.0418176	0.17212	0.183283	0.0884405	3.88677	3.74499	0.19312	0	NA
EPOR	Morula	0.0418176	0.17212	0.183283	0.0884405	3.88677	3.74499	0.19312	0	NA
EPS15	4-cell	7.64063	11.2531	9.84735	22.7844	13.462	8.88944	7.09008	14.5087	NA
EPS15L1	4-cell	12.188	30.8807	22.7755	55.9936	12.8761	2.25937	1.91439	5.25242	NA
EPS8	Oocyte	18.606	10.8713	5.60411	3.03092	1.12886	0.902043	7.75475	1.34244	NA
ERBB3	Blastocytes	0.0961259	0.0709534	0.0361337	0.144677	1.86086	15.7999	7.31061	13.5005	NA
ERBB3	Morula	0.0961259	0.0709534	0.0361337	0.144677	1.86086	15.7999	7.31061	13.5005	NA
ERGIC3	Blastocytes	6.91245	5.64033	5.93936	19.0514	15.0188	28.5093	33.8656	36.895	NA
ERP29	Blastocytes	8.09595	17.9761	19.0971	34.2699	14.6391	46.091	83.8063	68.6674	NA
ERRFI1	8-cell	7.3933	5.19224	3.92583	4.14104	36.7994	13.0418	31.8154	30.5959	NA
ESD	Blastocytes	17.3524	8.96927	5.0316	9.84339	2.7256	5.70421	54.2808	60.0451	NA
ESR2	Zygote	4.45821	10.5946	5.30081	13.7074	2.33506	0.47918	0	0.0438548	NA
ESRP1	2-cell	108.756	280.545	296.941	183.365	43.4891	52.6494	44.6392	51.5678	NA
ESRP1	Zygote	108.756	280.545	296.941	183.365	43.4891	52.6494	44.6392	51.5678	NA
ESRP2	Blastocytes	4.37471	5.01094	3.04916	2.17971	8.35098	9.57717	31.8996	31.3246	NA
ESRRA	Blastocytes	0.786024	1.05312	0.941161	0.965575	2.91772	7.63972	70.3094	74.391	NA
ESYT1	Morula	0.389154	4.39276	3.39619	2.7292	8.53626	31.3626	1.02822	2.45609	NA
ETFA	Oocyte	1258.18	717.259	912.669	667.888	163.773	25.7038	122.224	79.001	NA
ETFB	Blastocytes	2.71329	1.34852	1.29298	1.59364	2.57676	4.83158	41.807	21.3198	NA
ETV4	8-cell	0.0148366	0	0.00992405	0.852136	25.9504	35.6343	78.382	1.53068	NA
ETV4	Morula	0.0148366	0	0.00992405	0.852136	25.9504	35.6343	78.382	1.53068	NA
EXD1	8-cell	1.13736	1.09639	0.935221	1.18391	2.99096	3.67304	2.04554	1.23729	NA
EXD1	Morula	1.13736	1.09639	0.935221	1.18391	2.99096	3.67304	2.04554	1.23729	NA
EXOC3	4-cell	4.38573	12.0042	7.9797	17.3593	3.49373	4.87329	0.0179303	4.11203	NA
EXOC4	4-cell	6.90764	11.6817	8.31321	20.6844	4.51653	1.47943	4.19966	2.51817	NA
EXOSC10	8-cell	17.0451	8.89131	7.7381	13.8375	56.7309	48.9615	41.5358	39.4159	NA
EXOSC3	2-cell	380.351	276.15	333.14	245.97	228.56	111.315	86.3921	112.582	NA
EXOSC4	Morula	0.480992	0.462125	0.486502	0.72799	16.2848	46.8276	34.2616	24.2509	NA
EXOSC5	Blastocytes	2.71189	2.77925	2.33744	2.52108	13.7819	51.1036	39.9525	68.8128	NA
EXOSC5	Morula	2.71189	2.77925	2.33744	2.52108	13.7819	51.1036	39.9525	68.8128	NA
EXOSC6	8-cell	0.742724	1.48044	1.70668	0.907702	40.3885	20.1776	23.7344	8.17786	NA
EXOSC6	Morula	0.742724	1.48044	1.70668	0.907702	40.3885	20.1776	23.7344	8.17786	NA
EXOSC8	Blastocytes	15.1775	12.6195	9.97942	16.3301	16.9434	27.2181	129.44	128.125	NA
EXOSC9	Oocyte	306.513	221.967	203.424	130.25	63.4757	125.392	90.1695	52.0676	NA
EXPH5	Blastocytes	0.247365	0.209149	0.24619	0.272962	0.768891	1.20168	7.04777	5.56592	NA
EXT1	Oocyte	64.8892	33.6118	23.2793	31.633	10.7481	10.1427	13.7226	5.30878	NA
EXTL3	4-cell	7.45458	14.0824	9.58528	15.8064	12.0267	8.87524	2.66063	1.90188	NA
EYA1	4-cell	5.22171	8.92326	6.02782	12.7755	3.7517	0.483863	0	0.196226	NA
F11R	8-cell	1.99743	1.70595	1.60281	2.97336	83.3397	102.571	40.2912	53.2745	NA
F2R	Morula	0.314421	0.228637	0.304204	0.631262	0.941748	4.18649	1.81542	1.43797	NA
F2RL1	Morula	0	0.133544	0.050634	0.121371	7.01663	32.2174	29.6669	10.7692	NA
FABP5	Blastocytes	107.651	41.8115	35.7287	79.3561	61.8917	126.225	3562.96	2828.39	NA
FABP5L3	Blastocytes	0.185891	0.0842028	0.0808667	0.0601425	0.25675	0.983656	6.14527	3.66769	NA
FAF1	Blastocytes	2.29653	10.3305	5.27575	9.93472	4.92451	12.4532	49.0318	30.2935	NA
FAHD2A	4-cell	7.81651	6.89433	4.0182	15.8082	11.5773	3.51958	15.0571	8.49435	NA
FAM105B	Zygote	4.53841	10.0572	6.13931	5.25831	1.5384	2.11619	3.1179	1.65831	NA
FAM108C1	Blastocytes	1.48926	0.770991	0.691161	0.475319	5.64394	17.8591	36.3372	31.868	NA
FAM109B	Morula	0	0.0291062	0.00523623	0.0086242	0.151344	5.9391	0	0.125839	NA
FAM115A	Oocyte	129.697	54.3132	23.565	12.7695	4.13865	0.446001	4.03608	3.01207	NA
FAM115A	Zygote	129.697	54.3132	23.565	12.7695	4.13865	0.446001	4.03608	3.01207	NA
FAM117A	Oocyte	80.4148	30.8053	30.1362	50.8931	11.7231	6.12931	0.702877	0.641363	NA
FAM119A	8-cell	30.4171	18.0734	15.3156	15.1868	367.271	1139.78	206.134	40.3778	NA
FAM119A	Morula	30.4171	18.0734	15.3156	15.1868	367.271	1139.78	206.134	40.3778	NA
FAM120A	Blastocytes	10.2444	11.0238	7.05012	6.66725	5.82105	7.43762	54.9677	55.6304	NA
FAM122A	Zygote	32.4404	77.1838	52.2999	55.9967	26.6749	16.1497	1.77907	1.86294	NA
FAM122C	8-cell	1.13082	1.86887	1.01004	1.0643	26.3845	11.7091	9.19207	1.92037	NA
FAM124A	Zygote	0.91585	1.80304	0.953918	2.25043	0.161921	0.0609982	2.66373	0.00241555	NA
FAM126B	8-cell	2.69546	4.37454	2.48317	3.79146	10.3559	5.84465	3.75957	3.80422	NA
FAM134B	Oocyte	6.35698	1.34204	0.389574	0.637255	0.330554	0.0818892	0.00641643	0.801009	NA
FAM13B	8-cell	3.923	4.2604	3.22135	4.9123	21.2487	12.0316	2.73815	2.19516	NA
FAM149A	Oocyte	48.5944	41.1037	17.5352	20.9979	4.19634	0.494414	0.23893	0.00281945	NA
FAM149A	Zygote	48.5944	41.1037	17.5352	20.9979	4.19634	0.494414	0.23893	0.00281945	NA
FAM151A	Morula	0.00774982	0.0102577	0.0112303	0.158562	323.884	551.647	153.17	109.555	NA
FAM158A	Morula	0.0609341	0.0908915	0.0348348	0.506755	12.0989	25.584	22.9129	13.8537	NA
FAM162A	Blastocytes	1.11898	2.22075	1.32723	1.41559	5.19848	22.2318	71.8637	57.6341	NA
FAM162A	Morula	1.11898	2.22075	1.32723	1.41559	5.19848	22.2318	71.8637	57.6341	NA
FAM162B	8-cell	0	0	0	0.0422055	38.936	52.482	4.24617	0.542181	NA
FAM162B	Morula	0	0	0	0.0422055	38.936	52.482	4.24617	0.542181	NA
FAM164C	4-cell	0.38051	10.4937	3.27761	13.329	0.612199	0.471433	0	0.00616524	NA
FAM164C	Zygote	0.38051	10.4937	3.27761	13.329	0.612199	0.471433	0	0.00616524	NA
FAM166A	Morula	0.17381	2.99475	3.14593	3.28066	16.8255	20.0032	15.816	14.0253	NA
FAM167A	Oocyte	69.5776	12.1901	13.0726	24.0526	2.13209	0.0941143	0.00483788	0.000843461	NA
FAM172B	Zygote	4.71052	20.1987	11.8957	17.5482	2.18206	0.763895	0.499795	0.231725	NA
FAM174B	Zygote	11.6883	34.226	25.1395	19.7913	2.43237	0.423964	0.759315	1.29727	NA
FAM179A	Oocyte	15.339	6.37605	6.42154	6.58229	0.441874	0.201872	0	0	NA
FAM189A2	2-cell	16.2842	109.385	96.5154	56.1383	9.50261	4.32969	0	0.893623	NA
FAM189A2	Zygote	16.2842	109.385	96.5154	56.1383	9.50261	4.32969	0	0.893623	NA
FAM18B	8-cell	17.5196	29.0296	19.6302	42.4275	86.4204	58.2028	42.3607	33.5035	NA
FAM18B2	8-cell	3.06164	6.96854	4.50115	8.04652	17.5832	14.1478	10.5575	9.54988	NA
FAM19A2	Zygote	3.70132	18.5717	10.8162	13.7366	0.749315	1.94933	0	0.0018128	NA
FAM19A3	8-cell	0	0	0	0	17.2834	22.2906	0.806756	0	NA
FAM19A3	Morula	0	0	0	0	17.2834	22.2906	0.806756	0	NA
FAM19A4	Zygote	22.965	60.3114	33.7305	28.2588	6.14721	2.52507	0	0.00581721	NA
FAM19A5	Oocyte	27.161	11.8283	9.53621	13.0703	1.74311	0.362248	0	0.000929094	NA
FAM32A	8-cell	3.33609	6.08068	4.53042	10.8545	167.317	192.725	37.9888	41.3592	NA
FAM32A	Morula	3.33609	6.08068	4.53042	10.8545	167.317	192.725	37.9888	41.3592	NA
FAM3C	Blastocytes	9.85495	8.20279	3.60267	0.930696	5.69937	10.7463	39.2346	62.3925	NA
FAM46C	2-cell	287.142	379.609	513.986	401.468	53.3882	8.39703	0.161404	0.382735	NA
FAM48A	Oocyte	103.916	70.3522	65.0681	88.8229	16.8005	16.6279	23.676	23.2702	NA
FAM48B1	4-cell	2.0312	2.90016	1.91985	5.36777	0.159196	0.268624	0	0	NA
FAM48B2	4-cell	8.22773	17.7732	11.0676	26.5544	0.65889	1.98035	0	0.000998407	NA
FAM48B2	Zygote	8.22773	17.7732	11.0676	26.5544	0.65889	1.98035	0	0.000998407	NA
FAM50A	Blastocytes	0.762779	2.25707	1.27102	7.96967	2.38273	6.15354	11.2425	41.9063	NA
FAM53C	8-cell	50.4851	28.5325	27.9158	29.4348	121.811	68.1769	35.1419	19.6803	NA
FAM58A	8-cell	7.48232	7.85372	4.57271	11.0101	86.9119	66.8726	10.6579	12.615	NA
FAM64A	8-cell	0.559252	0.15871	0.0953094	1.6935	23.4191	9.54734	49.6245	0.0595226	NA
FAM70B	4-cell	1.32073	5.38619	2.85731	12.1199	0.706376	0.350369	0	0.240699	NA
FAM70B	Zygote	1.32073	5.38619	2.85731	12.1199	0.706376	0.350369	0	0.240699	NA
FAM74A1	Morula	0.153481	0.243319	0.200693	0.516054	1.0384	1.58457	0.849809	1.02596	NA
FAM74A3	Morula	0.141698	0.183374	0.186087	0.380652	1.00092	1.53997	0.946351	0.923679	NA
FAM81A	Zygote	2.95841	5.7892	2.63281	5.01354	0.195488	0.04222	0	0	NA
FAM81B	2-cell	0.721265	3.64789	3.97965	1.60157	0.940218	0.105385	0	0	NA
FAM83D	8-cell	0.0872916	5.20107	0.307725	4.20998	113.074	26.2954	93.5999	94.3472	NA
FAM83D	Blastocytes	0.0872916	5.20107	0.307725	4.20998	113.074	26.2954	93.5999	94.3472	NA
FAM83H	Blastocytes	0.00274698	0.0226408	0.00855769	0.0245365	0.193229	1.39437	7.89426	11.5444	NA
FAM86A	Blastocytes	1.15593	3.17191	2.01188	6.16219	3.379	6.27372	10.9952	17.2026	NA
FAM90A1	4-cell	0.00609882	0.110188	0.0541656	12.566	12.3959	7.93183	0	0.000973407	NA
FAM90A10	4-cell	0	0	0.0345489	10.5354	1.21206	4.27349	0	0	NA
FAM90A13	4-cell	0	0.0307932	0.259244	53.8028	5.81967	19.7579	0	0.00702752	NA
FAM90A14	4-cell	0	0.0291395	0.208803	53.226	5.56907	21.0415	0	0.00527064	NA
FAM90A18	4-cell	0	0.0145697	0.0744578	20.3513	2.7726	7.84685	0	0.00346868	NA
FAM90A19	4-cell	0	0	0.0491695	20.3769	2.8311	7.81949	0	0	NA
FAM90A20	4-cell	0	0	0.0548026	13.6332	1.66966	3.11288	0	0.00527064	NA
FAM90A25P	4-cell	0	0.197773	0.412982	45.8337	9.75816	32.1243	0	0.00120349	NA
FAM90A5	4-cell	0	0	0.047284	14.715	1.67464	5.92633	0	0.00351376	NA
FAM90A7	4-cell	0	0.292365	1.53744	193.246	16.0581	56.9481	0	0.0116464	NA
FAM90A8	4-cell	0	0.0145697	0.0544417	11.9012	1.88812	5.05925	0	0	NA
FAM90A9	4-cell	0	0.0145697	0.0588608	11.4279	1.74497	4.47271	0	0.00175688	NA
FAM96A	Blastocytes	39.1161	24.2052	16.6613	11.222	16.2625	61.7024	89.1167	126.454	NA
FAM98B	Zygote	0.615422	4.5228	2.07121	0.342897	0.452569	0.661349	0.30401	1.51453	NA
FAM9A	8-cell	0	0	0	1.79306	8.87208	0.147562	0	0	NA
FARP1	4-cell	5.85673	10.4871	6.48468	17.8068	2.77132	0.240982	5.35456	11.8381	NA
FARSA	Blastocytes	9.49489	13.397	9.99673	15.8309	5.67715	12.3216	88.6094	99.4032	NA
FASN	Blastocytes	0.0285644	0.179509	0.212017	0.348807	0.115005	0.113176	1.41211	3.22315	NA
FASTKD5	8-cell	0.102885	0.531503	0.301309	0.126085	88.8971	45.0587	12.3293	15.3772	NA
FASTKD5	Morula	0.102885	0.531503	0.301309	0.126085	88.8971	45.0587	12.3293	15.3772	NA
FAU	Blastocytes	123.06	52.2793	70.1305	196.097	749.386	915.437	914.067	908.479	NA
FBLIM1	8-cell	2.51579	2.72085	3.40246	2.14255	5.15017	7.98576	4.39609	3.35347	NA
FBLN5	4-cell	11.6817	25.481	18.249	34.979	7.47935	0.352869	0	0	NA
FBRS	2-cell	1.36559	10.934	14.7191	9.13731	7.92821	5.38516	0.27458	3.13236	NA
FBXL12	8-cell	23.4035	4.73582	4.11469	5.03827	129.126	32.8342	27.3545	17.519	NA
FBXL13	Oocyte	11.0323	3.01674	1.97086	4.30666	1.44876	1.74776	0.592553	0.671097	NA
FBXL3	8-cell	7.35418	9.89759	5.13623	4.93499	28.9172	5.7949	1.66007	4.52677	NA
FBXL6	Oocyte	25.8205	6.1737	6.64085	8.33036	4.20052	1.14683	10.7646	1.30978	NA
FBXO16	4-cell	3.42995	16.3856	5.89041	24.9634	1.74669	0.596508	0	0.00189705	NA
FBXO16	Zygote	3.42995	16.3856	5.89041	24.9634	1.74669	0.596508	0	0.00189705	NA
FBXO17	Morula	0.136703	0.0395145	0.0390781	0.0864054	0.711519	6.20746	2.79688	0.851211	NA
FBXO18	Oocyte	65.6617	23.9883	20.6704	31.915	7.13818	6.00043	8.78672	14.0672	NA
FBXO21	Blastocytes	0.663462	0.982355	0.356124	1.15484	3.61601	5.72853	7.68862	21.2122	NA
FBXO22	Blastocytes	0.83697	0.984669	0.551014	1.03035	2.77786	5.23672	22.969	23.5515	NA
FBXO22	Morula	0.83697	0.984669	0.551014	1.03035	2.77786	5.23672	22.969	23.5515	NA
FBXO22OS	Blastocytes	0.475847	0.857201	0.6084	0.899405	2.58004	4.98563	33.592	26.7082	NA
FBXO31	8-cell	0.0709483	0.25835	0.204076	0.483071	26.4583	13.2355	1.20566	0.442035	NA
FBXO31	Morula	0.0709483	0.25835	0.204076	0.483071	26.4583	13.2355	1.20566	0.442035	NA
FBXO33	Oocyte	23.289	17.9416	8.78095	6.76395	44.5315	4.44255	7.36468	5.28693	NA
FBXO4	Oocyte	4.23663	0.777461	0.647917	0.696788	0.0304102	0.218962	0	0.00348519	NA
FBXO43	Oocyte	36.9189	26.2972	14.4092	18.3821	0.881581	1.20621	0	0.00073129	NA
FBXO45	Oocyte	68.9058	60.1945	40.9375	19.5858	31.0519	13.1692	16.3342	18.5689	NA
FBXW5	Blastocytes	0.0130927	0.0226911	0	0.0322139	3.62866	6.28528	16.2482	20.6256	NA
FBXW7	8-cell	17.8399	19.4812	12.0143	15.6871	109.461	40.5234	13.1228	16.9659	NA
FCHO1	Oocyte	12.6974	5.67597	6.44123	11.9792	1.27538	0.129765	1.28075	0.00269434	NA
FCHSD2	4-cell	1.07199	1.53411	0.827969	3.9732	1.25737	0.685012	0.940747	1.67143	NA
FDPS	Blastocytes	1.72169	1.26961	1.06313	2.70652	2.20132	10.0974	70.2231	243.106	NA
FDX1L	8-cell	0.636311	2.25389	1.5445	1.08634	19.87	29.7862	25.3347	13.0492	NA
FDX1L	Morula	0.636311	2.25389	1.5445	1.08634	19.87	29.7862	25.3347	13.0492	NA
FEN1	Blastocytes	46.2516	17.8485	12.337	14.3182	5.9712	13.3698	75.0463	58.4629	NA
FER	4-cell	67.4485	47.5973	41.0685	94.4575	36.4931	12.0002	6.68163	10.4946	NA
FGD3	Zygote	0.698002	6.86496	2.75323	9.958	1.23059	1.43845	0.504642	0	NA
FGF12	Oocyte	2.70851	1.01271	0.658258	0.360178	0.198664	0.0392778	0	0.849915	NA
FGFR1	Oocyte	24.9511	12.7889	10.1588	8.30182	2.55732	4.20197	62.7935	2.19879	NA
FGFR3	Blastocytes	0	0	0	0.01758	2.09517	2.14585	1.42783	9.48744	NA
FGFR4	Blastocytes	0.00656333	0.0132443	0.0177591	0.00259459	1.13358	1.56226	6.30649	18.185	NA
FGFRL1	4-cell	1.53762	3.41364	2.95877	5.47731	2.32095	1.033	0.11824	0.0095699	NA
FHL2	Blastocytes	0.00818818	0	0.0119261	0.0163176	0.127332	1.85051	10.8942	79.9913	NA
FHOD3	Oocyte	50.6089	27.9747	22.3784	34.2489	4.4384	5.35604	0.00551817	0.0014867	NA
FIBP	Blastocytes	4.3084	4.9106	4.35783	11.417	14.005	10.554	56.2832	27.0721	NA
FILIP1	Blastocytes	0.0144307	0.0115126	0	0.117309	1.25846	2.87649	48.3271	17.0941	NA
FIP1L1	Zygote	181.805	224.417	169.444	118.508	42.3326	73.4229	54.6833	105.232	NA
FITM2	Morula	0.234233	0.0708209	0.2025	2.26612	1.93257	12.2074	3.19804	2.58465	NA
FKBP1B	Morula	0.601405	0.949853	0.03636	0.369609	10.79	35.431	10.5964	1.32755	NA
FKBP2	Blastocytes	13.3087	6.55958	3.68407	5.60978	14.5849	11.6103	45.5038	56.7407	NA
FKBP3	Blastocytes	4.22371	9.83183	4.53523	3.6837	8.84542	16.2743	79.6166	116.884	NA
FKBPL	8-cell	0.483707	2.1742	2.52	11.5891	33.8865	103.199	22.4804	5.07759	NA
FKBPL	Morula	0.483707	2.1742	2.52	11.5891	33.8865	103.199	22.4804	5.07759	NA
FLAD1	Blastocytes	2.47516	5.86397	4.28534	10.8056	17.6881	33.2522	43.7696	38.9814	NA
FLII	4-cell	8.13675	6.83446	5.92718	17.2044	3.62767	1.70665	6.09475	11.5737	NA
FLJ25758	Morula	0	0	0.0348201	0.0772081	9.17821	28.0939	0.139324	0	NA
FLJ35024	Oocyte	20.3723	5.26716	4.52911	7.71181	6.00525	2.83899	4.58631	0	NA
FLJ35776	Morula	0	0	0	0	1.72851	6.84486	0	0	NA
FLJ40852	4-cell	12.9999	28.4851	39.4255	53.4849	3.00233	2.25032	0	0.00357464	NA
FLJ42627	4-cell	1.9658	4.26396	3.05565	8.08961	1.77366	0.289023	0.0835748	0.328546	NA
FLJ44635	Blastocytes	0.132779	0.05678	0.202734	2.5846	0.344145	0.927579	14.1949	8.82474	NA
FLJ45983	8-cell	0	0	0.00657399	0.029182	11.5647	7.99876	0	0.3242	NA
FLJ90757	Morula	0.231892	0.190406	0.242235	0.197311	1.21291	2.98918	0.357985	0.325281	NA
FLNA	4-cell	0.0580691	0.705246	0.502976	2.66503	0.419653	0.0246873	1.44424	0.440758	NA
FLNB	Blastocytes	1.98141	2.86922	2.75675	3.15507	1.3879	2.30197	16.9939	14.9066	NA
FLVCR1	Blastocytes	0.535324	0.42782	0.264806	0.768972	3.16455	1.53504	12.053	11.1036	NA
FLYWCH2	Oocyte	108.054	26.7272	9.07104	16.7044	15.42	12.4621	15.0535	6.40328	NA
FNTB	2-cell	75.9416	115.162	116.613	86.0226	13.1116	5.37661	12.982	14.6093	NA
FOLR4	4-cell	4.34191	20.2365	10.457	37.884	3.59201	0.273139	0	0.00771101	NA
FOLR4	Zygote	4.34191	20.2365	10.457	37.884	3.59201	0.273139	0	0.00771101	NA
FOSL2	4-cell	1.89047	3.09629	2.84799	5.88038	0.966339	2.82218	2.28382	1.83161	NA
FOXG1	8-cell	0	0	0	0.294172	6.89836	4.93142	0.111958	0.0196548	NA
FOXG1	Morula	0	0	0	0.294172	6.89836	4.93142	0.111958	0.0196548	NA
FOXH1	Blastocytes	0.0305685	0.489643	0.600758	0.249633	1.2704	4.39798	45.2997	24.9522	NA
FOXJ3	4-cell	7.88204	31.6078	23.6273	35.0993	19.7221	4.6501	1.39694	2.70496	NA
FOXK2	4-cell	11.9235	30.2037	20.3285	32.6891	12.7354	11.3917	3.75668	11.5254	NA
FOXN2	8-cell	0.549388	0.875027	0.42984	1.13036	19.2661	5.21282	3.99731	3.79557	NA
FOXN2	Morula	0.549388	0.875027	0.42984	1.13036	19.2661	5.21282	3.99731	3.79557	NA
FOXO3	Oocyte	84.121	51.3035	37.1792	30.1647	11.1169	8.63738	3.56325	1.5613	NA
FOXO3B	Oocyte	9.81976	6.26215	4.28067	5.10049	4.64957	5.20146	0.42438	0.436609	NA
FOXR1	8-cell	29.8871	47.3422	57.1301	44.0527	270.376	307.531	51.484	69.0724	NA
FOXR1	Morula	29.8871	47.3422	57.1301	44.0527	270.376	307.531	51.484	69.0724	NA
FOXRED1	Blastocytes	0.0188704	0.134653	0.0130915	0.161011	0.863206	2.6985	7.33682	16.5682	NA
FRA10AC1	Oocyte	38.8342	34.1779	13.4161	5.893	0.869894	5.40196	8.43041	5.91953	NA
FRA10AC1	Zygote	38.8342	34.1779	13.4161	5.893	0.869894	5.40196	8.43041	5.91953	NA
FRAT1	Oocyte	11.1567	4.18873	4.07687	3.58259	1.83772	2.46542	0.18786	0.0501109	NA
FRG1B	8-cell	8.09827	11.2817	14.0778	12.3721	23.4197	22.588	11.9767	17.9423	NA
FRG2	4-cell	0.10285	0.333662	0.167988	51.0717	34.9677	215.331	0	0.696388	NA
FRG2C	4-cell	0.0565274	0.0404778	0.135623	58.525	38.7086	212.497	0	0.696661	NA
FRS2	8-cell	1.4766	6.03733	3.99056	8.37295	18.43	3.67078	2.31223	3.49272	NA
FSCN1	Morula	0	0.00814679	0.00545011	0.0109215	1.46628	4.25996	3.6039	5.26795	NA
FSTL5	Oocyte	6.98426	2.24412	0.768993	0.68473	0.138501	1.69282	0	0	NA
FTH1	Blastocytes	12.6713	60.9322	39.2604	63.0283	48.3586	82.7566	226.503	171.129	NA
FTL	2-cell	4837.33	1852.17	4093.03	1645.96	635.032	321.368	355.095	569.69	NA
FTL	Oocyte	4837.33	1852.17	4093.03	1645.96	635.032	321.368	355.095	569.69	NA
FUCA2	Blastocytes	0.678272	0.240196	0.0962795	0.233414	0.151509	1.72002	12.5301	22.3751	NA
FUNDC2	Blastocytes	4.44865	1.49962	0.809898	3.84725	13.2613	36.3214	52.1228	36.6236	NA
FUT3	Morula	0.00643533	0.283371	0.151294	0.283905	4.04253	47.076	0.013193	0.261347	NA
FUT4	8-cell	0.61586	0.357525	0.291005	0.351087	33.8694	24.3613	0.472325	8.13241	NA
FUT4	Morula	0.61586	0.357525	0.291005	0.351087	33.8694	24.3613	0.472325	8.13241	NA
FUT6	Morula	0.0694307	0.140177	0.106791	0.384521	1.24237	5.59702	0.560635	1.26684	NA
FUT8	4-cell	10.8588	26.1979	22.0209	48.0821	12.143	7.3354	3.15982	18.5011	NA
FXC1	8-cell	4.70096	8.58732	6.80514	9.40552	84.5723	52.9926	31.5835	18.0946	NA
FXC1	Morula	4.70096	8.58732	6.80514	9.40552	84.5723	52.9926	31.5835	18.0946	NA
FXN	Blastocytes	0.660572	0.746167	0.740392	0.896074	0.810298	2.63193	11.3132	6.72956	NA
FXYD4	Blastocytes	0	0.0689858	0.0654041	1.29275	6.22754	9.45402	22.429	73.43	NA
FYN	Oocyte	182.452	103.515	61.7803	52.5224	27.2301	8.03498	34.6192	0.815908	NA
FYN	Zygote	182.452	103.515	61.7803	52.5224	27.2301	8.03498	34.6192	0.815908	NA
FYTTD1	8-cell	2.20121	1.78793	0.881578	2.12346	26.4572	25.2688	3.00228	5.38916	NA
FYTTD1	Morula	2.20121	1.78793	0.881578	2.12346	26.4572	25.2688	3.00228	5.38916	NA
FZD3	Oocyte	85.3113	55.6184	35.8545	37.3878	13.1682	9.16911	5.8751	5.20897	NA
FZD6	Zygote	2.15838	5.61074	2.71565	2.00406	1.46668	0	0.0109445	0.634648	NA
G3BP1	Blastocytes	27.4027	47.9391	30.3027	47.558	10.2204	36.7523	87.482	159.132	NA
G3BP2	Morula	4.67044	7.5138	4.96902	11.4272	22.0016	62.7665	26.9847	29.6379	NA
G6PD	4-cell	2.09952	3.29882	2.87762	10.1823	1.91841	0.936247	0.975343	2.48328	NA
GAB1	4-cell	31.9764	51.952	52.5802	91.1872	17.3862	1.45381	1.97758	3.67304	NA
GABARAP	Blastocytes	10.4554	13.7871	10.5599	27.1952	32.2337	25.5764	182.96	130.603	NA
GABARAPL1	8-cell	2.67085	7.09138	4.34943	9.06685	126.964	417.67	35.9426	22.976	NA
GABARAPL1	Morula	2.67085	7.09138	4.34943	9.06685	126.964	417.67	35.9426	22.976	NA
GABPA	8-cell	10.7711	11.3289	6.09214	11.606	60.3326	15.5853	6.38371	7.78088	NA
GABRG3	Oocyte	7.26924	2.42219	1.50178	3.94762	0.662402	0.0202789	0	0.00122271	NA
GABRQ	8-cell	0	0	0	0.402376	8.26391	0.450207	0	0	NA
GABRR3	Zygote	9.65202	19.546	3.02152	18.0408	4.42437	0.135171	0	0.00174561	NA
GAD1	Oocyte	19.3745	8.84364	5.01055	7.02482	2.91976	4.04602	3.1418	0.0390455	NA
GADD45A	8-cell	0.524474	0.248188	0.126181	4.86582	80.5028	24.8642	24.38	15.2075	NA
GADD45B	8-cell	0.241089	0	0	3.25762	50.9587	3.81904	1.69351	3.86269	NA
GAGE12B	8-cell	0	0	0	0.364972	2.43483	1.49689	0.505543	0.0825007	NA
GAGE12C	8-cell	0.0296575	0	0	0.745048	5.19113	4.17411	1.01137	0.349326	NA
GAGE12D	8-cell	0	0.0387251	0	0.814395	5.2014	4.24004	0.869443	0.318072	NA
GAGE12E	8-cell	0	0	0	0.61349	4.96843	4.07636	1.05524	0.326319	NA
GAGE12F	8-cell	0	0	0	0.413559	2.83387	2.69745	0.88901	0.158792	NA
GAGE12G	8-cell	0	0	0	0.684082	4.33237	3.59654	0.70948	0.28526	NA
GAGE12H	8-cell	0	0.0402411	0	0.469901	3.29435	2.28769	0.449572	0.192791	NA
GAGE2A	8-cell	0	0	0	1.20736	6.14457	8.01936	0.801126	0.16183	NA
GAGE2C	8-cell	0.0310382	0	0	1.21885	4.33106	4.6792	0.807452	0.120875	NA
GAGE2D	8-cell	0	0	0	0.912937	3.55801	4.06291	0.440195	0.0769195	NA
GAGE2E	8-cell	0	0	0	1.41836	6.0058	8.28127	0.974887	0.0673323	NA
GAGE8	8-cell	0	0	0	1.10528	4.6731	5.4828	0.918038	0.151907	NA
GALE	Blastocytes	0.431476	0.319301	0.242724	0.0103051	0.336532	1.73119	16.1474	44.3352	NA
GALK1	Blastocytes	0.0895351	0.807557	0.961198	0.216289	0.821511	10.6182	4.78509	36.6747	NA
GALM	Morula	0.347436	0.522826	0.427003	0.98604	9.10293	27.1622	12.3432	10.7069	NA
GALNT10	Blastocytes	0.101892	0.0820244	0.0718387	0.169459	0.430196	1.7594	2.44477	24.4312	NA
GANAB	Blastocytes	0.2833	0.456924	0.414137	0.801946	2.5679	2.10706	3.23404	6.59055	NA
GAPDH	Blastocytes	91.3095	131.636	168.503	335.016	434.522	299.515	3384.61	3243.76	NA
GART	Blastocytes	2.20658	2.77844	1.87839	1.64472	9.31253	16.9377	41.9971	71.5927	NA
GART	Morula	2.20658	2.77844	1.87839	1.64472	9.31253	16.9377	41.9971	71.5927	NA
GAS2L3	Oocyte	15.3106	6.48918	5.65245	7.2852	0.588397	0.700874	0.00851309	2.36157	NA
GAS5	Morula	186.266	162.556	269.687	440.829	606.693	681.625	243.353	249.202	NA
GAS6	Blastocytes	2.30662	1.13708	0.482643	0.879468	0.436559	0.935824	53.2234	16.3796	NA
GAS7	4-cell	8.10689	15.6632	15.0131	21.3775	3.44641	2.78908	8.86639	12.32	NA
GATA2	Blastocytes	0.0391721	0.00765296	0.0288238	0.998984	5.52398	0.904581	28.1537	134.337	NA
GATA3	Blastocytes	0.260945	0.114801	0.0787848	1.55989	13.1983	9.7656	44.6017	244.383	NA
GATA6	8-cell	0	0	0	0.121737	139.724	173.248	115.692	52.7823	NA
GATA6	Morula	0	0	0	0.121737	139.724	173.248	115.692	52.7823	NA
GATAD1	Blastocytes	0.630466	0.475022	0.323805	0.384764	0.821537	1.8055	11.0046	21.6884	NA
GBF1	4-cell	8.80559	14.0882	9.92383	15.018	3.21	6.07059	2.12151	2.6435	NA
GBP6	Oocyte	1.98985	0.137894	0.133873	0.0987943	0.0499135	0.0842677	0.0568221	0.0512153	NA
GBX2	8-cell	0.294177	0.691711	0.242067	3.23457	27.8369	21.8958	12.8242	0.133361	NA
GBX2	Morula	0.294177	0.691711	0.242067	3.23457	27.8369	21.8958	12.8242	0.133361	NA
GCFC1	8-cell	3.09212	8.15621	3.34959	3.83778	28.3216	10.3042	13.5763	10.5517	NA
GCH1	Oocyte	205.147	147.469	113.888	102.544	11.7196	1.27548	2.799	29.6342	NA
GCNT3	4-cell	7.33663	121.792	103.489	212.716	26.915	10.8798	1.37888	0.0735561	NA
GCSH	Blastocytes	0.752382	0.511509	0.150934	0.137049	4.51964	9.26479	27.3517	48.7117	NA
GDE1	Blastocytes	0.654986	0.58246	0.347798	1.44152	11.6324	70.2894	63.2616	110.756	NA
GDE1	Morula	0.654986	0.58246	0.347798	1.44152	11.6324	70.2894	63.2616	110.756	NA
GDF9	2-cell	957.426	1565.34	1902.26	1251.29	652.937	99.9326	0.224851	1.76067	NA
GDI2	2-cell	64.721	256.916	378.477	350.938	172.607	89.2462	205.486	219.996	NA
GDPD1	Morula	0.506688	0.48093	0.742698	0.828919	2.49625	19.2207	6.11645	6.6337	NA
GEMIN5	2-cell	771.204	620.204	1004.66	351.597	51.2597	21.6285	14.7869	12.3238	NA
GFOD2	Morula	0.740767	1.41216	1.18276	1.41509	5.48722	7.95314	1.27824	2.19973	NA
GGA2	Blastocytes	0.640676	5.43035	5.01839	7.53166	4.91513	9.11247	17.6288	21.16	NA
GGA3	4-cell	3.45809	16.2519	11.7076	20.5899	6.16533	11.0799	17.2648	7.73663	NA
GGCT	Oocyte	169.769	97.7352	70.2164	60.8797	19.5177	11.4662	36.6901	66.3218	NA
GGNBP2	Oocyte	353.419	235.186	178.489	50.9954	122.914	83.697	49.3445	62.2632	NA
GHITM	Blastocytes	4.80136	30.677	18.4575	44.908	75.6806	123.443	138.868	146.537	NA
GINS2	2-cell	191.316	464.642	578.062	230.787	83.241	81.8705	30.3044	160.09	NA
GIP	8-cell	0	0	0.0304642	1.46376	70.3411	118.274	0.593697	1.64892	NA
GIP	Morula	0	0	0.0304642	1.46376	70.3411	118.274	0.593697	1.64892	NA
GIT2	4-cell	31.7232	85.3065	58.9185	95.0771	11.8686	5.29223	3.22084	4.49899	NA
GIT2	Zygote	31.7232	85.3065	58.9185	95.0771	11.8686	5.29223	3.22084	4.49899	NA
GJA1	Blastocytes	2.80715	3.22513	0.937274	2.91852	45.182	79.0866	203.351	278.841	NA
GK5	Morula	0.285061	0.486346	0.288712	0.300009	0.655383	1.94218	1.85427	4.69441	NA
GKAP1	Zygote	38.0925	108.755	64.5856	47.2562	14.7824	16.3273	8.75225	7.43675	NA
GLA	8-cell	1.8526	4.16399	2.37072	8.73234	48.8961	20.9708	40.3252	41.9666	NA
GLA	Blastocytes	1.8526	4.16399	2.37072	8.73234	48.8961	20.9708	40.3252	41.9666	NA
GLDC	Blastocytes	0.507598	0.189926	0.106055	0.46219	1.1512	1.52297	83.7614	28.5279	NA
GLIPR2	Blastocytes	1.16074	1.89871	0.534354	0.581891	1.32357	15.2685	37.73	88.1566	NA
GLO1	Blastocytes	25.4628	21.6521	23.4961	22.247	63.6314	114.578	88.1177	124.658	NA
GLRX3	Blastocytes	4.11534	15.8848	12.189	14.3378	50.7307	75.3459	78.2239	133.604	NA
GLRX5	Blastocytes	27.2478	19.0607	9.07818	9.36958	47.868	31.2617	52.1808	79.5325	NA
GLS	8-cell	1.10006	0.741044	0.528867	1.16289	50.931	10.1856	0.477184	1.95052	NA
GLS	Morula	1.10006	0.741044	0.528867	1.16289	50.931	10.1856	0.477184	1.95052	NA
GLS2	Oocyte	11.1799	3.14471	0.965188	16.4756	2.19482	0.0617134	0	0.0297044	NA
GLTSCR1	Oocyte	15.9557	9.45158	8.6349	4.89393	0.631759	0.837462	1.54462	0.1625	NA
GLUL	8-cell	1.46296	7.80839	5.56502	5.05198	328.716	176.151	63.464	38.4838	NA
GMCL1L	Oocyte	1.59611	2.29177	0.669215	0.5556	0.573698	0.39976	0.0540572	0.620624	NA
GMCL1L	Zygote	1.59611	2.29177	0.669215	0.5556	0.573698	0.39976	0.0540572	0.620624	NA
GMEB1	4-cell	13.1511	27.1266	22.3759	42.9665	16.3788	11.9401	5.35737	5.21713	NA
GMPPB	Blastocytes	0.0186902	0.399534	0.339403	0.460558	4.37129	5.94399	9.74961	24.3613	NA
GMPS	Morula	3.47802	6.03554	3.76723	5.78859	54.7082	116.53	36.603	69.6303	NA
GNA11	Oocyte	753.933	286.503	263.454	268.187	80.2458	78.7978	51.4078	39.459	NA
GNA14	4-cell	99.115	105.238	90.1673	145.585	13.2459	6.64078	0.607825	0.0138439	NA
GNAI3	8-cell	10.8323	29.0864	24.1793	34.6865	66.3178	35.8268	23.1546	27.447	NA
GNAL	8-cell	0.11703	0.141385	0.219063	0.143156	10.2803	7.41397	2.29414	1.17424	NA
GNAL	Morula	0.11703	0.141385	0.219063	0.143156	10.2803	7.41397	2.29414	1.17424	NA
GNAS	Blastocytes	11.0216	13.1578	10.3966	22.0836	19.1639	12.9281	181.109	113.522	NA
GNAT2	4-cell	44.0459	47.647	23.9649	77.8615	11.2649	4.18417	0	0.0489995	NA
GNB2L1	Blastocytes	235.707	138.591	182.305	418.848	1455.92	3694.21	2726.34	1827.86	NA
GNB2L1	Morula	235.707	138.591	182.305	418.848	1455.92	3694.21	2726.34	1827.86	NA
GNG10	Blastocytes	28.2147	17.6184	5.19098	3.29779	2.36778	9.33299	97.3753	171.346	NA
GNG2	4-cell	10.7992	30.1505	17.4121	28.1149	9.71642	1.79119	0.853086	0.104368	NA
GNL3	Morula	20.8405	69.7069	73.8864	74.4887	107.963	180.743	97.6531	149.497	NA
GNPNAT1	Blastocytes	0.694115	2.51682	0.738896	0.819802	17.244	18.0196	22.3948	45.2399	NA
GOLGA2	Oocyte	43.0133	31.0215	27.188	12.6241	10.6181	11.9366	12.5298	16.2976	NA
GOLGA6L5	Oocyte	8.50685	4.62728	5.05245	7.6193	1.71082	0.912286	0.119821	0.139787	NA
GOLM1	4-cell	23.2918	61.1712	42.9511	104.489	34.0386	13.4436	9.60193	4.66975	NA
GOPC	Oocyte	46.1141	26.5127	21.2361	22.7336	7.74931	5.26441	9.2299	11.2837	NA
GOSR1	8-cell	13.6253	7.44837	7.71812	14.759	232.087	667.668	138.35	36.0888	NA
GOSR1	Morula	13.6253	7.44837	7.71812	14.759	232.087	667.668	138.35	36.0888	NA
GOSR2	Morula	7.7862	23.6787	16.6638	30.2275	42.8043	61.8491	4.62176	14.6894	NA
GOT1	4-cell	16.3489	31.0365	30.9409	60.0274	12.3457	11.1503	82.3988	50.6913	NA
GPAA1	Blastocytes	1.38273	1.81879	0.908413	0.890693	0.835877	2.73686	20.9276	21.1783	NA
GPATCH3	8-cell	1.64024	6.10503	3.51827	5.9541	158.696	120.335	6.40352	5.48199	NA
GPATCH3	Morula	1.64024	6.10503	3.51827	5.9541	158.696	120.335	6.40352	5.48199	NA
GPATCH4	Morula	64.551	48.7857	45.6222	62.045	166.773	233.803	112.601	142.335	NA
GPI	Blastocytes	5.94202	22.314	18.7003	33.7443	8.51037	10.549	65.1429	50.5376	NA
GPKOW	4-cell	3.12413	16.4504	17.9887	35.7049	18.2321	16.7678	0.467142	4.12993	NA
GPLD1	Oocyte	33.705	20.7055	24.3217	15.7488	5.1589	0.508573	0.499435	0.824507	NA
GPR125	Oocyte	16.1564	6.5395	4.54105	12.6217	4.48663	1.43024	1.81571	2.61687	NA
GPR133	Oocyte	25.0274	4.87646	2.64216	4.37085	0.831956	0.0307828	1.96354	0.0147629	NA
GPR155	8-cell	0.38403	0.489892	0.356342	0.338491	13.8102	12.2239	0.24383	2.4012	NA
GPR155	Morula	0.38403	0.489892	0.356342	0.338491	13.8102	12.2239	0.24383	2.4012	NA
GPR172A	Blastocytes	1.32461	2.40654	3.75115	1.76752	5.20469	17.1147	21.1772	12.9791	NA
GPR172A	Morula	1.32461	2.40654	3.75115	1.76752	5.20469	17.1147	21.1772	12.9791	NA
GPR172B	Morula	0.135207	0.103746	0.0819302	0.0394752	3.38259	4.21619	6.50634	0.888458	NA
GPR3	Oocyte	13.1034	2.10797	3.01078	10.4014	1.7272	0.523165	2.01814	0.00232362	NA
GPR37L1	Morula	0.113249	0.21664	0.139527	0.677926	4.49351	4.51361	0.240532	0.467732	NA
GPR39	4-cell	11.8259	44.2813	35.0015	60.2625	7.20755	0.23074	0.00483525	0.00443942	NA
GPR39	Zygote	11.8259	44.2813	35.0015	60.2625	7.20755	0.23074	0.00483525	0.00443942	NA
GPR65	Morula	0.194826	0.179755	0.300063	0.424067	0.847868	1.51178	0.817377	0.872655	NA
GPR85	2-cell	1.15	6.50069	13.965	6.3396	2.37342	5.16662	2.80913	3.60932	NA
GPRC5A	Blastocytes	1.20305	0.499934	2.4628	0.635964	0.915926	0.695348	7.69465	97.6181	NA
GPS1	Blastocytes	7.09475	5.58984	4.34094	11.8075	17.7544	20.4473	48.1672	49.0955	NA
GPSM2	Zygote	5.70944	17.7665	12.6813	21.6061	3.0192	4.0366	0.93509	2.35283	NA
GPX1	Morula	33.8714	28.1604	17.5538	55.6047	157.733	234.964	284.058	142.127	NA
GPX4	Blastocytes	3.05346	1.21971	0.845881	3.76921	63.2017	163.501	144.114	145.979	NA
GRAP2	2-cell	1.07761	0.912475	2.60389	6.13756	0.400723	0.326884	0	0	NA
GRAPL	Morula	0	0	0.00631109	0	2.43904	7.67733	4.05175	0.00712427	NA
GRB2	8-cell	2.05257	1.80807	0.394184	0.922039	108.903	57.7058	42.3557	58.7482	NA
GRHL2	4-cell	4.92967	10.2816	9.37127	21.0458	3.61995	2.44825	1.87557	7.25568	NA
GRIA1	4-cell	0.541243	1.95016	0.949	4.79096	0.59505	0.0186105	0	0	NA
GRIA1	Zygote	0.541243	1.95016	0.949	4.79096	0.59505	0.0186105	0	0	NA
GRINA	4-cell	0.431627	3.88615	1.82187	6.16178	1.82789	1.75775	2.1449	0.596529	NA
GRIP1	Oocyte	19.1734	7.17084	5.25817	4.59252	0.604574	0.921922	0.00269527	0.541855	NA
GRIPAP1	4-cell	4.71831	8.69186	6.18938	16.3391	3.13828	3.05337	1.62181	3.56033	NA
GRK5	4-cell	12.8868	22.0567	13.4095	32.7206	8.44014	4.58966	13.0835	0.29347	NA
GRK6	Blastocytes	0.0124736	0.299466	0.318264	0.261957	0.340627	0.637934	1.76887	4.65426	NA
GRTP1	Oocyte	180.7	86.0348	82.8992	88.3225	16.0548	4.63991	5.34507	22.4928	NA
GRWD1	8-cell	0.818765	6.06598	5.51425	6.47979	107.033	95.9134	51.5733	39.959	NA
GSDMB	8-cell	0	0.0250126	0.0258737	0.102742	2.62902	1.3464	0.227458	0.609699	NA
GSTO1	Blastocytes	1.8989	0.675422	0.196692	0.912293	0.725387	2.12776	123.975	79.3309	NA
GSTP1	Blastocytes	7.10471	2.28281	1.12251	1.92152	11.3533	9.84567	1260.98	684.529	NA
GSTZ1	Blastocytes	0.484698	2.22263	0.991415	4.39911	0.739798	9.13119	22.3485	20.0679	NA
GTF2A1	8-cell	2.50984	3.93153	1.66391	3.47413	27.5662	26.1174	1.45333	4.32226	NA
GTF2B	Oocyte	438.338	167.6	112.791	49.6413	180.509	52.1664	39.0695	50.4657	NA
GTF2E2	8-cell	1.41119	3.43829	1.93839	3.88388	54.5223	31.3237	14.0418	43.9338	NA
GTF2H3	Blastocytes	1.39799	1.26166	0.668708	1.91698	4.9131	5.61589	18.3656	26.897	NA
GTF3A	Blastocytes	2.40434	3.70786	2.66248	3.68839	10.9057	34.573	144.366	121.714	NA
GTPBP3	8-cell	0.144709	0.791814	0.381975	0.329786	15.4832	25.793	4.87021	7.05688	NA
GTPBP3	Morula	0.144709	0.791814	0.381975	0.329786	15.4832	25.793	4.87021	7.05688	NA
GTPBP4	8-cell	9.48855	7.77054	9.02926	20.489	239.888	116.577	57.8843	122.279	NA
GTSE1	Oocyte	115.305	74.2365	63.0154	43.4387	14.6017	20.0924	26.4049	27.5619	NA
GTSF1	2-cell	118.076	431.268	682.096	325.283	67.0098	45.2129	95.4499	116.187	NA
GUF1	Blastocytes	1.24976	3.22297	1.74367	1.98665	10.0733	15.4948	25.7726	28.4462	NA
GUK1	Blastocytes	0.494996	1.292	0.490286	1.50521	1.74196	4.88216	4.35379	16.9838	NA
GUSBP1	8-cell	0.790209	0.678967	0.768931	1.00578	69.5391	21.7456	2.96913	3.50073	NA
GUSBP1	Morula	0.790209	0.678967	0.768931	1.00578	69.5391	21.7456	2.96913	3.50073	NA
GYG1	2-cell	194.387	573.697	1068.33	859.287	308.681	35.4571	64.9386	36.4533	NA
GYG1	4-cell	194.387	573.697	1068.33	859.287	308.681	35.4571	64.9386	36.4533	NA
GYLTL1B	Blastocytes	0	0	0.0247348	0.114122	0	0.44659	11.7854	63.1217	NA
H1FNT	8-cell	0	0	0	0.503076	22.2214	21.0661	0	0.413602	NA
H1FNT	Morula	0	0	0	0.503076	22.2214	21.0661	0	0.413602	NA
H1FOO	2-cell	2828.39	2390.11	4944.73	5225.38	1143.53	70.548	1.45956	0.435121	NA
H1FOO	4-cell	2828.39	2390.11	4944.73	5225.38	1143.53	70.548	1.45956	0.435121	NA
H2AFY	Blastocytes	7.59639	5.16443	3.0363	5.94924	7.97001	19.0978	57.4448	120.215	NA
H2AFZ	8-cell	0.512971	0.376122	0.481762	21.0197	3225.85	3801.59	962.617	1073.42	NA
H2AFZ	Morula	0.512971	0.376122	0.481762	21.0197	3225.85	3801.59	962.617	1073.42	NA
H3F3B	2-cell	1866.58	1774.66	2358.39	1412.98	1518.72	1581.95	379.986	511.625	NA
HABP2	4-cell	60.3394	132.081	124.91	293.697	77.9551	5.62811	0.637501	0.0414175	NA
HADH	4-cell	10.4594	7.27827	6.12721	33.689	13.2598	4.09571	36.4522	18.4122	NA
HADHA	Blastocytes	8.11214	9.90382	5.99353	11.739	6.57796	9.2767	32.3273	30.8453	NA
HADHB	Blastocytes	8.62377	4.86142	2.72567	7.45271	4.27547	8.58845	54.3344	32.1167	NA
HAGH	4-cell	21.0878	45.9038	28.1189	48.5525	14.6543	0.464327	4.01596	3.73526	NA
HAS3	Oocyte	63.8726	41.2494	37.2683	44.1199	3.54338	4.84834	0.100409	4.21356	NA
HAT1	8-cell	25.6817	25.2026	18.8075	32.4382	234.558	307.341	135.094	59.4827	NA
HAT1	Morula	25.6817	25.2026	18.8075	32.4382	234.558	307.341	135.094	59.4827	NA
HAUS1	Blastocytes	7.00898	23.4021	16.2763	22.4209	3.87387	2.45595	91.9296	42.6151	NA
HAUS2	Morula	1.30916	0.686307	0.752791	2.48481	12.6598	29.1559	11.0179	14.2224	NA
HAUS3	8-cell	3.55723	4.07028	1.51693	0.509267	14.5411	7.43827	0.96926	4.56053	NA
HAUS4	4-cell	174.243	56.1231	66.8594	136.966	54.7924	8.28623	39.6098	18.7419	NA
HAUS4	Oocyte	174.243	56.1231	66.8594	136.966	54.7924	8.28623	39.6098	18.7419	NA
HAUS8	4-cell	19.2437	39.2154	39.7259	99.9881	27.6109	27.8898	3.25438	12.7471	NA
HAVCR1	Blastocytes	0.0257234	0.0686973	0.0422291	0.27646	7.16914	18.3095	9.59978	65.2362	NA
HAX1	Blastocytes	5.74379	15.8357	8.81842	13.7676	21.3236	150.226	115.646	106.801	NA
HBEGF	8-cell	0.496628	0.398977	0.148485	0.749156	11.5068	18.4157	0.149666	0.327755	NA
HBP1	Oocyte	64.1878	26.6726	22.5216	44.1754	27.0069	18.2464	5.55985	9.05752	NA
HBXIP	Blastocytes	59.6778	36.3682	24.0271	22.7042	90.1266	151.774	142.921	150.428	NA
HCG11	8-cell	0.153235	0.216109	0.20206	0.177694	2.87042	2.09439	2.72101	0.433875	NA
HDAC1	Blastocytes	7.27127	6.60902	5.23718	7.54356	11.322	31.2364	18.7512	26.5639	NA
HDAC2	8-cell	2.91797	7.15188	4.84045	2.4564	54.1079	56.0595	24.2588	42.1666	NA
HDAC9	4-cell	53.9917	51.0428	66.0486	129.425	38.364	12.6741	0	0.00823797	NA
HDC	4-cell	20.5487	80.5576	107.555	129.656	30.1086	5.2778	0.00516492	0.0114135	NA
HDDC2	Blastocytes	1.1915	5.37184	5.04213	6.57779	7.4436	20.8123	76.8547	94.4595	NA
HDDC3	Blastocytes	0.14712	0.0764929	0.0353834	0.0203454	1.02451	10.5236	41.6822	64.8002	NA
HDGF	Blastocytes	22.3359	41.1703	35.9881	34.4444	6.89447	17.6898	58.9995	90.7502	NA
HDGFL1	Zygote	0.334492	1.15051	0.359142	0.838964	0.279743	0.113664	0	0.257091	NA
HDGFRP2	4-cell	4.04821	34.5092	26.7733	58.9511	49.7	21.0942	11.0236	16.3855	NA
HDHD1	Blastocytes	17.2126	1.87858	4.14898	4.49347	2.04473	9.37406	33.5452	38.4968	NA
HDHD3	8-cell	0.885917	6.29659	4.57951	4.71594	21.2229	34.2399	2.17144	7.98284	NA
HDLBP	4-cell	10.2248	31.2284	31.9424	60.0232	20.8445	22.4852	31.946	40.8063	NA
HEATR3	8-cell	0.0735714	0.161028	0.20704	0.194719	12.2475	9.87961	1.72223	3.80538	NA
HEATR3	Morula	0.0735714	0.161028	0.20704	0.194719	12.2475	9.87961	1.72223	3.80538	NA
HEATR7A	8-cell	0.50624	0.802057	0.727794	1.03777	3.36763	4.2234	0.938935	1.58334	NA
HEBP2	Blastocytes	0.838551	0.191757	0.254293	0.104731	2.44266	5.86065	4.51414	32.5079	NA
HECA	8-cell	0.469408	0.57413	0.381435	1.32407	6.03393	4.12642	0.124051	1.55612	NA
HELZ	Oocyte	40.5321	28.8212	23.3636	30.8607	9.22641	8.66403	10.7584	8.49182	NA
HERV-V1	8-cell	0.467187	0.695719	0.890887	1.23892	4.14259	5.30449	1.56673	3.28794	NA
HERV-V1	Morula	0.467187	0.695719	0.890887	1.23892	4.14259	5.30449	1.56673	3.28794	NA
HES2	8-cell	0.0924027	0.065292	0.110639	0.184572	8.6985	14.1707	0.340778	0.393544	NA
HES2	Morula	0.0924027	0.065292	0.110639	0.184572	8.6985	14.1707	0.340778	0.393544	NA
HES6	Oocyte	89.5098	44.5912	35.5114	28.928	13.0074	1.61613	0.00996739	3.03093	NA
HEXB	Oocyte	151.651	69.9344	63.56	24.3292	10.4255	6.27198	13.0034	46.9878	NA
HHEX	Oocyte	283.689	138.647	63.5196	32.4787	7.0774	9.63532	0.0595473	0.703943	NA
HHEX	Zygote	283.689	138.647	63.5196	32.4787	7.0774	9.63532	0.0595473	0.703943	NA
HHLA1	Zygote	0.673847	7.4932	2.22381	6.71187	0.561318	0.0135409	1.03715	0	NA
HIF3A	Zygote	0.377892	1.62742	0.877393	2.63629	0.099287	0.10771	0.0810272	0.0742373	NA
HIP1R	4-cell	4.60884	17.0264	11.9188	27.0553	7.96637	3.33903	9.71946	5.0753	NA
HIPK1	8-cell	4.61241	9.24399	4.85203	6.37144	10.9778	6.42	3.48974	4.69375	NA
HIPK3	8-cell	1.39757	3.82264	2.11883	7.10923	117.096	21.2153	2.6753	1.26109	NA
HIPK3	Morula	1.39757	3.82264	2.11883	7.10923	117.096	21.2153	2.6753	1.26109	NA
HIST1H1A	4-cell	39.9173	220.144	191.077	321.878	50.5662	38.4457	5.47076	2.52885	NA
HIST1H1C	8-cell	0.0437923	0	0.239323	0.755527	140.554	35.8948	22.0572	7.36302	NA
HIST1H1C	Morula	0.0437923	0	0.239323	0.755527	140.554	35.8948	22.0572	7.36302	NA
HIST1H1E	4-cell	5.38539	29.6023	7.61168	49.3445	29.6445	11.6035	19.0273	5.82362	NA
HIST1H2AC	8-cell	0.0893204	0.111799	0.990947	2.00165	109.348	18.3181	0.237047	1.50392	NA
HIST1H2AC	Morula	0.0893204	0.111799	0.990947	2.00165	109.348	18.3181	0.237047	1.50392	NA
HIST1H2AD	8-cell	0	0	0	0.308415	13.8745	2.53549	0.0452086	3.14507	NA
HIST1H2AH	Zygote	3.07186	43.0663	12.8665	23.8766	7.34918	0.842216	0	0.628635	NA
HIST1H2AM	8-cell	0	0.795026	0.182506	4.76938	134.396	286.547	14.8407	7.76383	NA
HIST1H2AM	Morula	0	0.795026	0.182506	4.76938	134.396	286.547	14.8407	7.76383	NA
HIST1H2BC	8-cell	0.111395	0.21994	0.266724	7.84741	84.9261	30.8059	0.0328798	0.035505	NA
HIST1H2BC	Morula	0.111395	0.21994	0.266724	7.84741	84.9261	30.8059	0.0328798	0.035505	NA
HIST1H2BD	8-cell	0.0378413	0.161631	0.0854548	1.90298	69.4056	44.6827	7.54661	0.01592	NA
HIST1H2BD	Morula	0.0378413	0.161631	0.0854548	1.90298	69.4056	44.6827	7.54661	0.01592	NA
HIST1H2BE	8-cell	0.0847862	0.315056	0.217098	2.74427	15.8514	14.5022	0.130739	0.0726349	NA
HIST1H2BG	8-cell	0	0	0	1.91924	184.07	97.1717	12.2732	8.46142	NA
HIST1H2BG	Morula	0	0	0	1.91924	184.07	97.1717	12.2732	8.46142	NA
HIST1H2BH	8-cell	0	0	0	0.0588565	39.4367	46.386	0	0.825728	NA
HIST1H2BH	Morula	0	0	0	0.0588565	39.4367	46.386	0	0.825728	NA
HIST1H2BK	8-cell	44.612	93.6449	56.1453	168.498	363.915	293.444	26.0357	2.73386	NA
HIST1H2BN	8-cell	0.411762	0.767009	0.424424	3.52685	19.2829	3.33295	0.0304361	1.85107	NA
HIST1H2BO	8-cell	0.256164	0.227327	0.163772	1.81557	17.0972	21.682	0.0599654	0.0415691	NA
HIST1H3C	8-cell	0.0439514	0	0	1.4296	34.5137	3.8709	1.38351	0.396135	NA
HIST1H3D	8-cell	0	0.0235344	0.00836619	1.12921	40.1329	8.19103	0.358171	0.874393	NA
HIST1H3H	8-cell	0	0	0	0.0515313	20.1891	2.2138	0.0851304	0.0570763	NA
HIST1H4C	Blastocytes	0.0394464	0	0.074832	0.0989344	35.3267	147.798	774.391	371.535	NA
HIST2H2AA3	8-cell	0.422904	1.13455	0.406364	4.38907	74.77	25.9883	0.752482	1.00172	NA
HIST2H2AA3	Morula	0.422904	1.13455	0.406364	4.38907	74.77	25.9883	0.752482	1.00172	NA
HIST2H2AA4	8-cell	0.468117	1.1809	0.421909	4.43857	73.4789	25.8601	0.50539	0.877932	NA
HIST2H2AA4	Morula	0.468117	1.1809	0.421909	4.43857	73.4789	25.8601	0.50539	0.877932	NA
HIST2H2AC	8-cell	0.274377	0.78667	0.233812	0.881517	7.61909	2.30486	0	0.835338	NA
HIST2H2BE	8-cell	0.0945805	0.860847	0.386801	1.5124	35.7071	6.54378	0.0061393	0.0113702	NA
HIST2H2BF	8-cell	0.65966	7.7417	6.15215	21.2656	76.0384	36.4534	19.9311	0.548922	NA
HIST2H3D	8-cell	0.458309	0.595422	0.707462	4.1556	10.1713	2.68867	8.79162	0	NA
HIVEP1	4-cell	8.29826	12.1749	9.40623	17.7206	3.85935	10.2044	0.407379	1.04236	NA
HJURP	4-cell	76.9828	141.621	197.657	208.351	121.887	52.1288	26.5027	22.5467	NA
HKR1	4-cell	3.00432	29.5443	16.3961	55.5846	15.2187	14.8488	6.46949	3.62759	NA
HLA-E	Blastocytes	0.0365225	0.0269917	0.0445816	0.0845025	5.03037	6.6201	56.9559	8.23257	NA
HMBOX1	Oocyte	50.7579	31.2422	30.7158	26.0879	13.819	8.0681	12.628	8.63152	NA
HMGA1	Blastocytes	26.0412	33.2791	38.0644	42.4281	55.1813	46.9513	133.062	98.9758	NA
HMGCR	Blastocytes	14.7078	14.1621	9.25998	15.2578	20.0214	14.1981	65.1361	73.8646	NA
HMGCS1	Blastocytes	1.56063	2.50029	1.00465	1.9007	5.94097	5.53808	48.2595	140.047	NA
HMGN4	8-cell	23.8469	21.2336	14.012	19.5329	157.997	162.478	41.138	20.2526	NA
HMGXB4	Oocyte	131.616	102.689	85.6538	79.8516	22.5297	19.7092	12.3734	11.196	NA
HMHA1	4-cell	57.4063	14.4049	17.0399	33.8519	5.80874	1.40848	5.77245	4.84314	NA
HMHA1	Oocyte	57.4063	14.4049	17.0399	33.8519	5.80874	1.40848	5.77245	4.84314	NA
HMOX1	Blastocytes	0.341547	0.127512	0.276434	0.70791	6.39119	25.8757	4.21575	24.8285	NA
HN1	Blastocytes	14.4811	11.2824	9.95267	21.6861	208.412	624.184	354.892	315.378	NA
HN1	Morula	14.4811	11.2824	9.95267	21.6861	208.412	624.184	354.892	315.378	NA
HN1L	Blastocytes	5.53658	9.79437	6.30724	3.5285	4.04587	12.9379	44.8603	59.8793	NA
HNF1A	4-cell	6.3173	16.1937	16.0677	37.5594	14.9011	3.42439	0.00611911	0.0214983	NA
HNF4A	Morula	0	0	0	0	4.58816	6.79377	2.5958	0.0834548	NA
HNRNPA3	Blastocytes	1.95075	4.36601	4.30427	2.66885	30.1621	46.1565	50.4255	103.08	NA
HNRNPA3P1	Blastocytes	0.0421001	0.0690346	0.0936955	0.134426	1.02092	1.67148	3.48134	7.66301	NA
HNRNPAB	8-cell	4.83327	4.16223	3.37667	4.06598	539.557	283.14	163.672	213.334	NA
HNRNPCL1	8-cell	0.129494	0.0183637	0.0982213	5.61571	249.815	49.8234	1.2625	2.11782	NA
HNRNPCL1	Morula	0.129494	0.0183637	0.0982213	5.61571	249.815	49.8234	1.2625	2.11782	NA
HNRNPD	Blastocytes	24.9057	80.8021	58.811	38.7831	182.305	323.881	316.595	417.07	NA
HNRNPF	8-cell	286.157	173.51	171.997	149.408	505.633	361.056	315.918	460.436	NA
HNRNPH1	8-cell	7.9166	10.1846	9.63944	14.9712	130.637	134.398	70.3179	50.8688	NA
HNRNPH1	Morula	7.9166	10.1846	9.63944	14.9712	130.637	134.398	70.3179	50.8688	NA
HNRNPH2	8-cell	21.4707	18.1188	14.2027	7.25967	62.5177	18.7856	57.2378	44.1934	NA
HNRNPK	Blastocytes	30.8945	27.0763	17.486	13.5951	107.485	126.522	139.88	174.823	NA
HNRNPL	8-cell	2.80217	1.67548	1.43809	1.14413	35.4218	22.4753	13.2829	17.2212	NA
HNRNPU	8-cell	19.4085	35.0657	25.8332	21.5449	151.681	105.973	45.4285	80.4483	Yes
HNRPDL	8-cell	64.7819	21.9048	13.4701	36.7516	397.536	521.647	225.124	206.436	NA
HNRPDL	Morula	64.7819	21.9048	13.4701	36.7516	397.536	521.647	225.124	206.436	NA
HOXA7	Oocyte	121.169	67.9745	49.68	102.661	13.3927	3.3021	0.0477114	0.724289	NA
HOXC10	8-cell	0	0	0	0.456482	6.03812	6.6201	0	0.90522	NA
HOXC10	Morula	0	0	0	0.456482	6.03812	6.6201	0	0.90522	NA
HOXD8	Oocyte	12.4415	7.84115	4.18151	2.45095	1.5216	4.00635	0	0.00963842	NA
HPDL	Blastocytes	0.0335495	0.0576979	0.0684495	0.0901507	2.31421	26.5168	19.0798	22.722	NA
HPDL	Morula	0.0335495	0.0576979	0.0684495	0.0901507	2.31421	26.5168	19.0798	22.722	NA
HPGD	Blastocytes	0	0.0273659	0	0.160586	0.271887	0.413254	132.164	55.3764	NA
HPS3	Oocyte	12.7808	5.52586	1.81632	3.75708	1.35173	0.454327	4.65321	2.92321	NA
HRSP12	Blastocytes	6.55623	2.30832	0.944288	2.47727	11.5014	14.5772	59.9259	89.1011	NA
HS6ST1	Blastocytes	0.282945	0.331448	0.33157	0.799081	2.43317	10.3249	50.7018	16.4705	NA
HS6ST1	Morula	0.282945	0.331448	0.33157	0.799081	2.43317	10.3249	50.7018	16.4705	NA
HSBP1	Blastocytes	49.8007	21.2915	17.9772	30.1368	24.867	22.2158	27.0725	54.0661	NA
HSD17B12	Blastocytes	7.80406	8.73803	4.90477	2.08056	8.65216	9.48517	46.3673	66.4006	NA
HSDL1	4-cell	18.3399	29.1727	17.7051	28.3842	6.1311	2.47229	0.137888	1.26539	NA
HSDL1	Zygote	18.3399	29.1727	17.7051	28.3842	6.1311	2.47229	0.137888	1.26539	NA
HSF2BP	4-cell	185.298	123.23	83.6566	195.077	56.7193	10.3824	1.68914	3.15544	NA
HSP90AB1	Blastocytes	264.111	191.194	546.313	649.857	310.131	128.348	662.813	959.554	NA
HSP90AB2P	Morula	0.382501	0.902954	0.755302	2.97332	10.7188	37.6072	14.5186	8.94177	NA
HSPA12B	2-cell	0.139939	1.44071	1.74766	0.68008	0.139404	0.0848097	2.85259	0	NA
HSPA1A	4-cell	320.479	77.8436	74.3382	150.891	36.4694	8.99765	31.9401	5.75285	NA
HSPA1A	Oocyte	320.479	77.8436	74.3382	150.891	36.4694	8.99765	31.9401	5.75285	NA
HSPA1B	4-cell	147.271	46.3293	44.5799	163.264	39.0434	7.65755	38.5192	7.62326	NA
HSPA1B	Oocyte	147.271	46.3293	44.5799	163.264	39.0434	7.65755	38.5192	7.62326	NA
HSPA1L	4-cell	2.59047	25.6575	10.8856	28.3374	0.756115	2.85586	0.11444	0.011595	NA
HSPA1L	Zygote	2.59047	25.6575	10.8856	28.3374	0.756115	2.85586	0.11444	0.011595	NA
HSPA2	8-cell	1.40581	7.27575	3.73986	15.8753	89.9219	30.6025	4.41266	3.05411	NA
HSPA4	Blastocytes	18.9387	29.3199	20.2825	24.2916	25.7331	36.2527	155.948	196.504	NA
HSPA5	8-cell	7.71121	41.2576	29.1684	72.242	296.609	272.355	199.102	130.799	NA
HSPA5	Morula	7.71121	41.2576	29.1684	72.242	296.609	272.355	199.102	130.799	NA
HSPA9	Blastocytes	25.2934	49.7992	42.5174	39.1756	137.185	108.013	224.859	225.852	NA
HSPB11	Oocyte	356.36	127.553	83.981	70.8566	50.6806	39.2194	6.33418	37.7571	NA
HSPD1	Blastocytes	14.7409	26.7959	22.2597	23.0294	11.3142	26.8349	484.998	524.019	NA
HSPE1	Blastocytes	126.427	59.6704	53.0377	21.8194	28.0864	23.4757	231.834	226.498	NA
HSPE1	Oocyte	126.427	59.6704	53.0377	21.8194	28.0864	23.4757	231.834	226.498	NA
HTRA2	Blastocytes	9.29537	4.79706	3.33815	7.7531	6.3542	8.31763	18.4871	30.8606	NA
HUS1	Blastocytes	0.563478	2.00219	1.56808	3.81082	5.99853	16.1736	41.7321	22.4385	NA
HUWE1	Blastocytes	0.821039	1.92862	1.69397	1.88285	5.22305	6.73013	8.40302	10.7085	NA
IAH1	2-cell	154.74	143.646	231.081	187.297	44.2476	11.1525	26.1022	5.81053	NA
IARS	Blastocytes	12.1465	7.82655	5.19248	7.4703	8.37317	13.4492	37.3622	46.7956	NA
IBTK	Blastocytes	0.309211	0.297469	0.131841	0.768942	0.665144	4.68005	14.2019	20.8839	NA
ICA1	Oocyte	42.7364	19.348	16.1771	26.9913	8.46972	3.0053	0.0888205	3.16319	NA
ICMT	Blastocytes	17.6299	18.0537	12.6195	15.2809	15.8055	35.4556	37.9527	69.1871	NA
ICOSLG	Morula	0	0	0	0.000819695	1.26715	6.70356	1.15003	1.47204	NA
ICT1	Blastocytes	12.2363	4.97522	5.85598	9.89313	25.5404	45.2375	76.7306	95.1515	NA
ID2	8-cell	3.5312	3.12372	2.08294	35.6429	65.6255	105.875	53.2173	31.2366	NA
IDE	Zygote	11.4399	29.368	22.9926	25.9965	8.28977	3.281	3.89971	9.0868	NA
IDH1	Blastocytes	144.827	76.1905	75.5521	101.793	13.5674	16.1182	412.83	239.381	NA
IDH1	Oocyte	144.827	76.1905	75.5521	101.793	13.5674	16.1182	412.83	239.381	NA
IDH3A	Blastocytes	9.26013	15.8605	7.60123	13.1807	8.75641	15.4974	28.5357	61.5447	NA
IDH3B	Blastocytes	1.20679	1.74592	1.24031	3.21524	17.4313	26.7805	46.3102	53.9645	NA
IER2	2-cell	47.5271	91.2044	75.6924	38.8302	3.52553	13.01	19.6131	24.3483	NA
IER3	8-cell	0.566929	1.21922	0.812946	12.5428	160.324	429.871	25.9438	0.459118	NA
IER3	Morula	0.566929	1.21922	0.812946	12.5428	160.324	429.871	25.9438	0.459118	NA
IER5	8-cell	0.248562	1.21287	0.643312	4.20301	129.045	104.446	41.568	5.23535	NA
IER5	Morula	0.248562	1.21287	0.643312	4.20301	129.045	104.446	41.568	5.23535	NA
IFFO1	4-cell	0.915296	3.89096	2.83222	5.93358	2.0509	1.35411	0.0714741	0.00310663	NA
IFITM1	Blastocytes	0.0661408	0	0	0.292234	1.52841	0	728.517	13.7543	NA
IFITM2	Blastocytes	0	0	0.0418575	0.0239877	0.0215383	0.0117338	97.5464	34.5822	NA
IFITM3	Blastocytes	0.0479224	0	0	0.134619	0.372259	0.387978	410.457	121.461	NA
IFRD1	8-cell	12.2521	9.26153	4.86538	12.7006	112.198	48.7592	28.5241	52.7814	NA
IFRD2	Blastocytes	0.236901	0.0981898	0.074206	0.438193	16.0252	24.6587	26.0879	46.5052	NA
IFT20	Morula	5.42961	7.83238	6.49381	3.55259	25.9061	45.8919	23.04	13.9598	NA
IFT27	Oocyte	12.2027	3.06618	3.69239	13.456	3.46167	1.59008	2.72423	3.69959	NA
IFT74	Oocyte	13.5282	7.31027	5.91809	5.43973	2.98897	3.30092	2.96719	4.96846	NA
IGBP1	4-cell	98.577	31.2878	34.897	107.3	59.3778	44.2731	62.3201	46.3018	NA
IGDCC3	Oocyte	64.0494	23.2992	17.4655	15.0274	5.27448	3.09231	0.359939	9.64171	NA
IGF2BP1	Blastocytes	0.0438526	0.0333908	0.0482901	0.157115	12.6434	23.2268	35.9705	57.0852	NA
IGF2BP3	2-cell	66.0012	148.032	142.349	83.5316	19.3494	20.8007	28.0405	32.7909	NA
IGF2BP3	Zygote	66.0012	148.032	142.349	83.5316	19.3494	20.8007	28.0405	32.7909	NA
IGFBP3	4-cell	36.4032	18.4416	12.7974	49.9777	7.68977	1.58386	0	0.00505057	NA
IGSF10	4-cell	2.87872	6.11984	9.06812	17.452	4.91542	0.819345	0.841992	0.470813	NA
IGSF11	Oocyte	30.5892	20.5672	13.933	3.16956	0.466997	0.266569	0.0415564	0.117565	NA
IKZF5	8-cell	5.28569	2.98596	1.43339	3.88377	24.9107	12.3502	0.169492	6.09845	NA
IL15RA	Oocyte	7.36496	0.489963	0.362395	2.76514	0.217337	0.0467135	0	0	NA
IL16	4-cell	1.07423	3.00229	2.07961	5.43694	0.48074	0.178184	0.00241447	0.000508634	NA
IL28RA	8-cell	1.20247	1.68176	1.93947	1.64526	5.06932	7.64577	2.83937	4.89986	NA
IL4	Oocyte	11.9154	2.49777	1.65089	4.22108	0.58749	0	0	0	NA
IL7	Oocyte	1.65611	0.474244	0.187977	0.00806573	0	0	0	0	NA
IL9	Oocyte	7.09124	0.576451	0.364966	0.916157	0.233097	0	0	0	NA
ILF2	8-cell	167.407	212.703	283.616	306.474	854.754	782.99	310.778	383.448	NA
ILVBL	Blastocytes	0.102332	0.0982242	0.132655	0.0297329	0.228053	3.22026	4.69184	15.1594	NA
IMP3	8-cell	16.1834	11.1043	10.8279	14.5297	239.656	357.911	52.5617	93.0838	NA
IMP3	Morula	16.1834	11.1043	10.8279	14.5297	239.656	357.911	52.5617	93.0838	NA
IMP4	8-cell	0.648681	6.13052	3.44405	10.3023	105.487	94.5177	30.4056	51.4088	NA
IMPA1	4-cell	23.3898	37.6932	37.8635	57.444	12.2616	7.74639	8.64871	4.79562	NA
IMPDH1	8-cell	0.3637	0.468995	0.318033	0.162514	68.5141	61.4407	26.7359	22.5609	NA
IMPDH1	Morula	0.3637	0.468995	0.318033	0.162514	68.5141	61.4407	26.7359	22.5609	NA
IMPDH2	Blastocytes	58.3784	17.937	19.9807	59.244	76.0943	32.2039	251.964	224.496	NA
ING1	8-cell	2.33102	3.78199	1.96676	6.2966	26.174	17.3057	3.55061	8.05458	NA
ING2	8-cell	23.3452	15.6188	7.11065	5.34155	152.215	162.564	46.1557	29.7627	NA
INGX	Morula	0.564009	0.816944	0.683131	1.26133	5.92981	7.14555	1.45003	1.90226	NA
INO80	8-cell	7.25476	8.73072	4.95024	5.12264	20.3185	12.0608	6.12242	8.51551	NA
INO80C	Morula	14.9492	5.09803	5.59072	9.21139	103.611	94.5318	29.3018	24.3612	NA
INPP5E	Oocyte	31.3188	16.4466	11.0141	10.8987	0.812725	0.357854	0.329131	0.343578	NA
INTS10	Oocyte	75.1303	17.7433	15.4951	37.9677	13.7784	16.81	21.0895	16.7686	NA
INTS4	Morula	2.40086	2.30348	1.71676	4.0769	19.2355	17.5416	7.09931	6.08446	NA
INTS6	8-cell	9.20471	12.8807	6.23933	4.60949	29.7402	18.5796	0.615581	8.98185	NA
IP6K1	4-cell	7.89198	15.9305	9.56675	24.0792	1.70126	5.38841	5.4299	2.4136	NA
IPO5	Blastocytes	5.18369	6.87544	5.81352	17.8398	25.4497	27.7547	67.1953	133.973	NA
IPO7	Blastocytes	2.9313	5.70689	4.08572	5.18353	14.3812	28.6082	23.3454	28.7257	NA
IPO8	2-cell	135.395	199.636	221.367	122.022	25.0354	4.67945	1.95116	6.16443	NA
IPO8	Zygote	135.395	199.636	221.367	122.022	25.0354	4.67945	1.95116	6.16443	NA
IPPK	8-cell	1.91538	5.53706	2.85344	4.36245	8.87256	4.04177	3.98506	3.40568	NA
IQCB1	Oocyte	42.3981	28.1341	12.124	10.7533	2.33015	4.26225	13.546	7.80683	NA
IQCD	4-cell	26.6487	7.10597	6.25347	21.0712	5.4701	6.70887	0.0106591	0.712777	NA
IQCD	Oocyte	26.6487	7.10597	6.25347	21.0712	5.4701	6.70887	0.0106591	0.712777	NA
IRAK2	Oocyte	7.57724	2.9149	2.2691	3.38686	0.737177	0.364367	0.0290831	0.0825099	NA
IRF3	Blastocytes	0.160411	0.144224	0.155974	0.238738	3.82831	10.4092	20.5279	23.0737	NA
IRF4	8-cell	0.00941135	0.0199815	0.0044661	0.452083	6.47771	0.314937	0	0.000964813	NA
IRF8	Oocyte	81.3165	52.8816	27.8729	21.1277	0.962292	0.907102	0	0.000921057	NA
IRGM	Zygote	14.8005	43.3606	23.8615	16.8413	2.14106	1.87261	0.00867138	0.0837279	NA
IRGQ	Morula	0.53028	0.807407	0.656919	0.573366	3.88537	14.0094	2.48101	2.04922	NA
IRX3	8-cell	0	0	0	0	4.85179	5.38442	0.334676	0.107405	NA
IRX3	Morula	0	0	0	0	4.85179	5.38442	0.334676	0.107405	NA
IRX5	8-cell	0.0466196	0.0329352	0.006577	1.16726	31.9593	10.8979	0	0	NA
IRX5	Morula	0.0466196	0.0329352	0.006577	1.16726	31.9593	10.8979	0	0	NA
ISCA1	Blastocytes	6.04271	5.80374	3.17997	2.85867	29.4536	34.8496	32.8162	70.0614	NA
ISCA2	Blastocytes	0.416798	2.46494	1.63164	2.71668	13.4972	18.0099	46.7626	45.1989	NA
ISL1	Oocyte	27.6162	20.3581	9.3014	15.9909	4.07687	10.6985	0.0153086	0.00180678	NA
ISOC1	Oocyte	73.0523	51.0038	31.2409	14.7011	6.37684	10.6112	13.6505	20.5844	NA
ISPD	4-cell	5.23433	9.04091	6.5805	15.8655	3.99627	1.20081	1.13737	1.70324	NA
ISY1	8-cell	2.20939	5.02276	3.45049	7.85516	181.09	103.67	45.1433	50.0355	NA
ISY1	Morula	2.20939	5.02276	3.45049	7.85516	181.09	103.67	45.1433	50.0355	NA
ITGA5	Morula	0	0	0.0213233	0.22457	2.97132	21.853	0	0.0537526	NA
ITGAE	Oocyte	16.3377	6.37252	4.64372	9.36124	2.9337	1.48449	7.41677	4.06602	NA
ITGB1BP1	Blastocytes	7.82645	10.4549	5.88094	20.0137	7.40171	14.7528	43.2036	59.4895	NA
ITM2B	Blastocytes	5.63918	9.53349	5.33874	6.10981	22.2807	24.7548	77.731	115.468	NA
ITPA	Blastocytes	14.0793	8.61993	6.36363	17.6404	13.3121	46.207	106.558	73.4129	NA
ITPKA	8-cell	0.201892	0.132659	0.327241	0.480229	6.55544	8.66287	0.00769926	0	NA
IWS1	2-cell	558.475	845.917	1056.44	404.506	126.927	70.1327	47.5201	52.0838	NA
JAKMIP1	Oocyte	6.73036	0.984542	0.571812	1.42592	0.273447	0.0997463	0	0	NA
JARID2	Oocyte	390.643	251.235	181.241	76.4529	20.0612	7.7194	31.4075	15.6582	NA
JDP2	Blastocytes	0.210965	1.28976	0.933746	0.947244	0.120662	0.238372	2.16659	5.24354	NA
JKAMP	8-cell	0.481801	0.988123	0.405023	0.28559	45.5041	41.3813	11.9862	28.0464	NA
JPH3	4-cell	6.55509	4.09398	3.40855	11.2664	4.68418	0.511531	0.00682794	0.0022132	NA
JTB	Blastocytes	26.0177	11.4706	6.40372	8.6134	4.8108	24.0824	45.8459	111.375	NA
JUB	Morula	0.0584383	0.0490586	0.0843099	0.17712	7.09505	11.9855	0.600307	6.82475	NA
JUP	Blastocytes	23.2129	8.42217	7.05072	20.2009	3.06933	1.46761	38.8068	123.597	NA
KALRN	4-cell	8.19738	16.8852	15.885	28.0575	6.51703	0.777964	0.090254	0.0878162	NA
KATNAL1	4-cell	30.145	50.4878	47.8582	65.0381	9.64359	7.56597	2.86521	1.49851	NA
KATNB1	4-cell	7.32869	13.006	9.86633	19.8907	5.74598	3.30596	0.421986	4.34789	NA
KCMF1	Zygote	9.90323	19.8061	11.6239	10.3851	3.30379	6.33484	9.65902	19.3496	NA
KCNH8	Oocyte	4.33228	3.02369	2.41795	3.77334	1.22139	0.927392	0	0.0876039	NA
KCNIP4	Zygote	2.23508	4.31251	2.51623	5.38401	0.764725	0.228629	0.107857	0.00101961	NA
KCNJ6	Oocyte	9.631	3.96237	2.09028	2.5675	0.371647	0.0876879	0.607224	0	NA
KCNK1	Blastocytes	0	0	0	1.12473	5.17038	10.4119	5.31435	30.5828	NA
KCNK9	4-cell	8.71133	28.9863	27.8411	87.7399	4.89745	1.91321	0	0.0161888	NA
KCNMB4	8-cell	0.022575	0.048946	0.136513	0.342439	13.3314	6.69125	0.904716	3.20589	NA
KCNN2	Oocyte	51.3023	24.0912	18.0601	31.5299	5.76385	8.67982	0.415109	0.466995	NA
KCNS3	Zygote	3.22566	7.18301	3.07805	3.0644	1.01865	0.238718	9.70875	0.0430879	NA
KCTD5	Oocyte	267.549	74.5827	59.7732	69.21	50.9601	27.1215	9.26309	11.8839	NA
KCTD6	8-cell	0.00838047	0	0.0115865	0.153998	18.933	7.67088	10.17	3.04178	NA
KDELC1	Oocyte	17.8049	4.81187	2.79305	6.04953	1.96249	2.3531	0.00953978	0.94015	NA
KDELC2	Morula	0.252089	0.358175	0.495444	0.346142	0.94302	1.51042	1.44901	3.23858	NA
KDELR1	Blastocytes	9.51542	10.8838	14.8584	15.0895	25.6672	25.751	33.8308	40.5249	NA
KDM1B	Zygote	16.617	62.7425	33.5201	44.5645	17.1061	0.829634	0.50125	0.0588267	NA
KDM5B	8-cell	0.774577	0.87078	0.490093	1.54074	175.578	46.1315	35.7925	38.8744	NA
KDM5D	Morula	0	0	0	0	0.136711	2.60941	0.603433	2.47991	NA
KDM6A	Oocyte	32.9412	24.0569	16.2585	11.7082	3.83775	2.46046	3.02813	3.48323	NA
KEAP1	Morula	0.640133	1.25597	1.38799	3.7726	6.64688	24.0534	13.1659	11.3713	NA
KHDC1	8-cell	0.607683	0.0904572	0	4.79789	291.535	264.578	1.52375	7.13857	NA
KHDC1	Morula	0.607683	0.0904572	0	4.79789	291.535	264.578	1.52375	7.13857	NA
KHDC1L	Morula	0	0	0	11.6701	1997.38	4286.24	2846.81	1664.51	NA
KHDRBS3	Oocyte	107.897	47.2065	21.5279	15.5278	21.8339	23.7753	56.8477	148.498	NA
KHK	4-cell	1.49259	8.50374	5.18192	12.573	2.34101	1.19728	0	0.888605	NA
KIAA0020	Morula	40.3018	38.7264	24.6789	19.5277	110.858	110.733	68.8534	78.336	NA
KIAA0090	Blastocytes	0.404518	0.768201	0.55838	0.833776	1.31905	3.16669	5.29673	7.3146	NA
KIAA0101	Blastocytes	2.82668	2.88187	2.95365	3.31521	10.5475	15.2294	11.5172	38.989	NA
KIAA0114	Blastocytes	47.1294	35.655	23.0882	43.5881	91.64	174.948	153.976	307.288	NA
KIAA0174	8-cell	10.3066	12.2062	7.58028	12.5571	117.336	102.173	42.7125	52.6569	NA
KIAA0174	Morula	10.3066	12.2062	7.58028	12.5571	117.336	102.173	42.7125	52.6569	NA
KIAA0182	4-cell	12.445	38.0161	24.0033	37.3275	2.36471	1.20979	6.10509	15.9872	NA
[truncated: 2,772 more rows]
